# Supplementary material for: Characterization by LC-MS/MS analysis of KLH vaccine conjugated with a tick antigen peptide
Source: Royal Society of Chemistry journal article supplement (doi:10.1039/d4an01449a), 2025-01-01
Supplement: d4an01449a2.xlsx [file d4an01449a2.xlsx]

## Sheet: Table SI
Table SI. Sequence verification of KLH1 using the Peaks software.
Digestion	Peptide	PTM	Mass	ppm	m/z	z	Scan	Start	End
LEP	ENLVRK.S	G peptide	757.445	-1.7	379.729	2	2357	1	6
v8	K.SVEHLTQEE.T	G peptide	1070.49	0.1	536.251	2	8006	7	15
v8	K.SVEHLTQEETLDLQAALR.E	G peptide	2052.05	0.1	685.024	3	36696	7	24
LEP	K.SVEHLTQEETLDLQAALRELQMDSSSIGFQK.I	L peptide	3502.72	-0.4	876.688	4	54185	7	37
LEP	K.SVEHLTQEETLDLQA.A	non-specific cleavage	1711.83	5.6	856.925	2	35108	7	21
LEP	K.SVEHLTQEETLDLQAALR.E	non-specific cleavage	2052.05	2.8	1027.03	2	39911	7	24
LEP	K.SVEHLTQEETLDLQAALREL.Q	non-specific cleavage	2294.18	1.3	765.733	3	53642	7	26
LEP	K.SVEHLTQEETLDLQAALRELQM.D	non-specific cleavage	2553.27	5.1	1277.65	2	54267	7	28
LEP	K.SVEHLTQEETLDLQAALRELQM(+15.99).D	non-specific cleavage, Oxidation (M)	2569.27	1.9	857.432	3	53694	7	28
trypsin	K.SVEHLTQEETLDLQAALRELQM(+15.99)DSSSIGFQK.I	Oxidation (M)	3518.72	1.3	880.688	4	50770	7	37
LEP	K.SVEHLTQEETLDLQAALRELQM(+15.99)DSSSIGFQK.I	Oxidation (M)	3518.72	-0.5	1173.91	3	54077	7	37
trypsin	K.SVEHLTQEETLDLQAALR.E	T peptide	2052.05	0.8	1027.03	2	38000	7	24
trypsin	S.VEHLTQEETLDLQAALR.E	non specific cleavage	1965.02	1.3	656.014	3	36379	8	24
trypsin	H.LTQEETLDLQAALR.E	non specific cleavage	1599.85	1.1	800.932	2	39716	11	24
v8	E.TLDLQAALR.E	G peptide	999.571	0.6	500.793	2	32813	16	24
LEP	E.TLDLQAALRELQMDSSSIGFQK.I	non-specific cleavage	2450.25	1	817.757	3	54528	16	37
LEP	A.ALRELQMDSSSIGFQK.I	non-specific cleavage	1808.91	2.1	603.978	3	31727	22	37
LEP	A.ALRELQM(+15.99)DSSSIGFQK.I	non-specific cleavage, Oxidation (M)	1824.9	2.8	609.31	3	25473	22	37
LEP	A.LRELQMDSSSIGFQK.I	non-specific cleavage	1737.87	0.3	580.298	3	30068	23	37
LEP	A.LRELQM(+15.99)DSSSIGFQK.I	non-specific cleavage, Oxidation (M)	1753.87	1.2	585.63	3	22832	23	37
LEP	L.RELQMDSSSIGFQK.I	non-specific cleavage	1624.79	3.2	542.605	3	24800	24	37
LEP	R.ELQMDSSSIGFQK.I	non-specific cleavage	1468.69	0	735.351	2	31533	25	37
trypsin	R.ELQM(+15.99)DSSSIGFQK.I	Oxidation (M)	1484.68	1.1	743.349	2	20120	25	37
LEP	R.ELQM(+15.99)DSSSIGFQK.I	Oxidation (M)	1484.68	1.2	743.349	2	22572	25	37
LEP	L.QM(+15.99)DSSSIGFQK.I	non-specific cleavage, Oxidation (M)	1242.56	-1.7	622.284	2	16080	27	37
LEP	K.IAAAHGAPASC(+57.02)VHK.D	Carbamidomethylation	1388.7	0.2	463.907	3	5101	38	51
LEP	I.AAAHGAPASC(+57.02)VHK.D	non-specific cleavage, Carbamidomethylation	1275.61	-1.1	426.212	3	5116	39	51
LEP	A.AAHGAPASC(+57.02)VHK.D	non-specific cleavage, Carbamidomethylation	1204.58	-0.3	402.533	3	5143	40	51
trypsin	M.PTFPHWHR.A	non specific cleavage	1076.53	-0.1	539.272	2	24568	63	70
v8	M.PTFPHWHR.A	non-specific cleavage	1076.53	-1.1	359.85	3	23129	63	70
LEP	T.FPHWHR.A	non-specific cleavage	878.43	1.4	440.223	2	18376	65	70
LEP	R.AYVVHMER.A	non-specific cleavage	1003.49	0.9	502.753	2	13847	71	78
trypsin	R.AYVVHM(+15.99)ER.A	Oxidation (M)	1019.49	-0.9	340.836	3	11656	71	78
trypsin	R.AYVVHMER.A	T peptide	1003.49	1.1	502.753	2	11594	71	78
trypsin	A.YVVHMER.A	non specific cleavage	932.454	2.5	467.235	2	11595	72	78
trypsin	Y.VVHMER.A	non-specific cleavage	769.39	3.3	385.704	2	11597	73	78
v8	Y.VVHMER.A	non-specific cleavage	769.39	1	385.703	2	10686	73	78
LEP	W.TEPITQLPSLAADPVYIDSQGGK.A	non-specific cleavage	2399.22	1.3	800.749	3	50475	95	117
trypsin	S.LAADPVYIDSQGGK.A	non specific cleavage	1432.72	0.2	717.367	2	25026	104	117
LEP	A.ADPVYIDSQGGK.A	non-specific cleavage	1248.6	0.7	625.307	2	18388	106	117
v8	D.PVYIDSQGGK.A	G peptide	1062.53	3.3	532.276	2	11082	108	117
trypsin	D.PVYIDSQGGK.A	non specific cleavage	1062.53	0.7	532.275	2	12045	108	117
LEP	D.PVYIDSQGGK.A	non-specific cleavage	1062.53	3.5	532.276	2	14398	108	117
v8	K.AHTNYWYR.G	G peptide	1109.5	-0.8	555.759	2	11301	118	125
LEP	K.AHTNYWYRGNIDFLDK.K	L peptide	2011.95	0	1006.98	2	35222	118	133
trypsin	K.AHTNYWYR.G	T peptide	1109.5	-0.4	370.842	3	12394	118	125
LEP	N.YWYRGNIDFLDK.K	non-specific cleavage	1588.77	1	530.597	3	39475	122	133
LEP	Y.WYRGNIDFLDK.K	non-specific cleavage	1425.7	0.8	476.242	3	35343	123	133
LEP	W.YRGNIDFLDK.K	non-specific cleavage	1239.62	-2.9	620.818	2	35259	124	133
LEP	R.GNIDFLDK.K	non-specific cleavage	920.46	-0.7	461.237	2	29532	126	133
trypsin	R.GNIDFLDK.K	T peptide	920.46	0.8	461.238	2	25651	126	133
LEP	G.NIDFLDK.K	non-specific cleavage	863.439	2	432.728	2	31445	127	133
LEP	N.IDFLDK.K	non-specific cleavage	749.396	1.3	375.706	2	28629	128	133
LEP	K.TNRAVDDRLFEK.V	L peptide	1462.75	-1.2	732.383	2	15884	135	146
LEP	T.NRAVDDRLFEK.V	non-specific cleavage	1361.71	-1.1	454.908	3	15926	136	146
LEP	K.VKPGQHTHLMESVLDALEQDEFC(+57.02)K.F	Carbamidomethylation	2810.34	-0.9	703.591	4	46093	147	170
LEP	K.VKPGQHTHLM(+15.99)ESVLDALEQDEFC(+57.02)K.F	Oxidation (M); Carbamidomethylation	2826.33	-0.1	707.59	4	37267	147	170
LEP	K.PGQHTHLMESVLDALEQDEFC(+57.02)K.F	Carbamidomethylation	2583.17	-0.1	862.065	3	50008	149	170
LEP	K.PGQHTHLM(+15.99)ESVLDALEQDEFC(+57.02)K.F	Oxidation (M); Carbamidomethylation	2599.17	-4.7	867.393	3	41080	149	170
LEP	H.THLMESVLDALEQDEFC(+57.02)K.F	non-specific cleavage, Carbamidomethylation	2163.98	0.8	722.335	3	53951	153	170
LEP	H.LMESVLDALEQDEFC(+57.02)K.F	non-specific cleavage, Carbamidomethylation	1925.88	0.1	963.945	2	54216	155	170
v8	H.LMESVLDALEQDEFC(+57.02)K.F	non-specific cleavage, Carbamidomethylation	1925.88	-0.4	963.944	2	49248	155	170
v8	E.SVLDALEQDEFC(+57.02)K.F	Carbamidomethylation	1552.71	-1.2	777.36	2	41467	158	170
v8	S.VLDALEQDEFC(+57.02)K.F	non-specific cleavage, Carbamidomethylation	1465.68	1.3	733.846	2	30141	159	170
trypsin	K.FEIQFELAHNAIHYLVGGK.H	T peptide	2185.13	0.5	547.29	4	50374	171	189
LEP	K.FEIQFELAHNAIHYLVGGK.H	T peptide	2185.13	3	547.292	4	53469	171	189
LEP	E.IQFELAHNAIHYLVGGK.H	non-specific cleavage	1909.02	3.7	478.264	4	44626	173	189
LEP	F.ELAHNAIHYLVGGK.H	non-specific cleavage	1520.81	3.5	507.946	3	27207	176	189
LEP	L.AHNAIHYLVGGK.H	non-specific cleavage	1278.68	0.4	320.678	4	15928	178	189
v8	L.AHNAIHYLVGGK.H	non-specific cleavage	1278.68	1	427.235	3	17807	178	189
LEP	A.HNAIHYLVGGK.H	non-specific cleavage	1207.65	0.8	403.556	3	15644	179	189
v8	A.HNAIHYLVGGK.H	non-specific cleavage	1207.65	1.3	403.557	3	17867	179	189
trypsin	H.NAIHYLVGGK.H	non specific cleavage	1070.59	0.3	536.301	2	17985	180	189
LEP	H.NAIHYLVGGK.H	non-specific cleavage	1070.59	1.7	536.302	2	20462	180	189
v8	H.NAIHYLVGGK.H	non-specific cleavage	1070.59	1.8	536.302	2	17232	180	189
LEP	N.AIHYLVGGK.H	non-specific cleavage	956.544	1.1	479.28	2	16934	181	189
LEP	A.IHYLVGGK.H	non-specific cleavage	885.507	0.2	443.761	2	20540	182	189
LEP	H.YLVGGK.H	non-specific cleavage	635.364	2.7	318.69	2	10526	184	189
trypsin	K.HDYSMANLEYTAYDPIFFLH.H	non specific cleavage	2446.09	-0.1	816.372	3	51290	190	209
trypsin	K.HDYSMANLEYTAYDPIFFLHH.S	non specific cleavage	2583.15	-1.1	646.795	4	50607	190	210
trypsin	K.HDYSM(+15.99)ANLEYTAYDPIFFLHH.S	non specific cleavage, Oxidation (M)	2599.15	0.4	650.794	4	50073	190	210
trypsin	K.HDYSM(+15.99)ANLEYTAYDPIFFLHHSNVDR.I	Oxidation (M)	3170.42	0.8	793.613	4	46887	190	215
trypsin	K.HDYSMANLEYTAYDPIFFLHHSNVDR.I	T peptide	3154.42	1.5	789.615	4	48354	190	215
trypsin	Y.SMANLEYTAYDPIFFLHHSNVDR.I	non specific cleavage	2739.28	-0.6	685.826	4	48732	193	215
trypsin	M.ANLEYTAYDPIFFLH.H	non specific cleavage	1812.87	1.4	907.445	2	51548	195	209
trypsin	M.ANLEYTAYDPIFFLHH.S	non specific cleavage	1949.93	-0.2	650.984	3	50624	195	210
trypsin	M.ANLEYTAYDPIFFLHHSNVDR.I	non specific cleavage	2521.2	-4.2	841.405	3	45516	195	215
trypsin	A.NLEYTAYDPIFFLH.H	non specific cleavage	1741.84	1.8	871.926	2	51579	196	209
trypsin	A.NLEYTAYDPIFFLHH.S	non specific cleavage	1878.89	0.9	627.306	3	50640	196	210
trypsin	A.NLEYTAYDPIFFLHHSNVDR.I	non specific cleavage	2450.17	0	613.549	4	45513	196	215
v8	E.YTAYDPIFFLHHSNVDR.I	G peptide	2094	0.1	524.506	4	39036	199	215
v8	E.YTAYDPIFFLH.H	non-specific cleavage	1385.67	-0.6	693.84	2	49624	199	209
trypsin	Y.TAYDPIFFLHHSNVDR.I	non specific cleavage	1930.93	0.6	483.741	4	37675	200	215
v8	Y.TAYDPIFFLHH.S	non-specific cleavage	1359.66	3.8	680.841	2	45356	200	210
v8	Y.TAYDPIFFLHHSNVDR.I	non-specific cleavage	1930.93	-2.2	644.65	3	38555	200	215
v8	T.AYDPIFFLHH.S	non-specific cleavage	1258.61	1.5	630.315	2	45290	201	210
v8	T.AYDPIFFLHHSNVDR.I	non-specific cleavage	1829.88	4	610.971	3	38554	201	215
trypsin	A.YDPIFFLHH.S	non specific cleavage	1187.58	-1.9	594.794	2	47070	202	210
trypsin	A.YDPIFFLHHSNVDR.I	non specific cleavage	1758.85	0.6	440.719	4	35871	202	215
v8	A.YDPIFFLHH.S	non-specific cleavage	1187.58	-0.7	594.795	2	45341	202	210
v8	A.YDPIFFLHHSNVDR.I	non-specific cleavage	1758.85	-1	587.289	3	38620	202	215
v8	Y.DPIFFLHHSNVDR.I	non-specific cleavage	1595.78	4.6	798.903	2	38603	203	215
v8	D.PIFFLHHSNVDR.I	G peptide	1480.76	-3.1	741.384	2	38612	204	215
trypsin	D.PIFFLHHSNVDR.I	non specific cleavage	1480.76	2.7	371.198	4	23349	204	215
v8	I.FFLHHSNVDR.I	non-specific cleavage	1270.62	1.5	636.319	2	38548	206	215
v8	R.LQELR.N	G peptide	657.381	0.8	329.698	2	6259	223	227
LEP	K.AMDC(+57.02)AQELLHQK.M	Carbamidomethylation	1442.66	0	722.34	2	23195	233	244
LEP	K.AM(+15.99)DC(+57.02)AQELLHQK.M	Oxidation (M); Carbamidomethylation	1458.66	1.4	487.228	3	17941	233	244
LEP	A.MDC(+57.02)AQELLHQK.M	non-specific cleavage, Carbamidomethylation	1371.63	-1.4	686.82	2	23205	234	244
LEP	M.DC(+57.02)AQELLHQK.M	non-specific cleavage, Carbamidomethylation	1240.59	-0.8	621.3	2	23196	235	244
LEP	D.C(+57.02)AQELLHQK.M	non-specific cleavage, Carbamidomethylation	1125.56	-2.5	563.786	2	23235	236	244
v8	D.TLNLNGMTPEELK.T	G peptide	1458.74	3.7	730.379	2	34812	263	275
LEP	L.NLNGMTPEELK.T	non-specific cleavage	1244.61	0.3	623.311	2	26082	265	275
LEP	K.TYLDERSSRARAFASFRLK.G	L peptide	2273.2	6.4	569.312	4	38072	276	294
trypsin	R.ARAFASFR.L	T peptide	924.493	0.9	309.172	3	13307	285	292
v8	R.AFASFR.L	G peptide	697.355	0.3	349.685	2	17272	287	292
LEP	R.AFASFRLK.G	non-specific cleavage	938.534	1.4	313.852	3	25861	287	294
LEP	A.FASFRLK.G	non-specific cleavage	867.497	1	434.756	2	25909	288	294
LEP	F.ASFRLK.G	non-specific cleavage	720.428	0.4	361.221	2	25897	289	294
LEP	K.GFGGSANVFVYVC(+57.02)IPDDNDRNDDHC(+57.02)EK.A	Carbamidomethylation	3099.31	2.3	775.836	4	44367	295	321
LEP	S.ANVFVYVC(+57.02)IPDDNDRNDDHC(+57.02)EK.A	Carbamidomethylation	2694.14	4.2	674.546	4	37726	300	321
LEP	N.VFVYVC(+57.02)IPDDNDRNDDHC(+57.02)EK.A	non-specific cleavage, Carbamidomethylation	2509.06	4.3	628.276	4	33674	302	321
v8	F.VYVC(+57.02)IPDDNDR.N	non-specific cleavage, Carbamidomethylation	1364.6	0.3	683.309	2	24898	304	314
v8	K.AGDFFVLGGPSEMK.W	G peptide	1453.69	-1.2	727.852	2	42389	322	335
trypsin	K.AGDFFVLGGPSEM(+15.99)K.W	Oxidation (M)	1469.69	0.4	735.851	2	40084	322	335
LEP	K.AGDFFVLGGPSEM(+15.99)K.W	Oxidation (M)	1469.69	2.1	735.852	2	44576	322	335
v8	K.AGDFFVLGGPSEM(+15.99)K.W	Oxidation (M)	1469.69	-0.9	735.85	2	38365	322	335
trypsin	K.AGDFFVLGGPSEMK.W	T peptide	1453.69	2.2	727.854	2	44174	322	335
LEP	K.WQFYRPYLFDLSDTVHK.M	L peptide	2214.09	-0.6	1108.05	2	49100	336	352
trypsin	K.WQFYRPYLFDLSDTVHK.M	T peptide	2214.09	-0.9	554.529	4	47673	336	352
LEP	Q.FYRPYLFDLSDTVHK.M	non-specific cleavage	1899.95	1.2	634.325	3	41307	338	352
trypsin	F.YRPYLFDLSDTVHK.M	non specific cleavage	1752.88	2.3	585.303	3	35014	339	352
v8	F.YRPYLFDLSDTVHK.M	non-specific cleavage	1752.88	1.6	439.229	4	33531	339	352
trypsin	Y.RPYLFDLSDTVHK.M	non specific cleavage	1589.82	5.4	530.95	3	31728	340	352
LEP	Y.RPYLFDLSDTVHK.M	non-specific cleavage	1589.82	1.6	530.948	3	33639	340	352
v8	R.PYLFDLSDTVHK.M	G peptide	1433.72	-3.2	478.912	3	37095	341	352
trypsin	R.PYLFDLSDTVHK.M	T peptide	1433.72	-0.3	478.913	3	38691	341	352
trypsin	Y.LFDLSDTVHK.M	non specific cleavage	1173.6	1	392.209	3	27917	343	352
LEP	Y.LFDLSDTVHK.M	non-specific cleavage	1173.6	1.3	392.209	3	30635	343	352
LEP	L.FDLSDTVHK.M	non-specific cleavage	1060.52	1.5	531.268	2	30089	344	352
v8	L.FDLSDTVHK.M	non-specific cleavage	1060.52	-0.5	531.266	2	26856	344	352
LEP	L.DGHYTVK.A	non-specific cleavage	818.392	0.6	410.204	2	8170	358	364
v8	K.GFTDPPVK.H	G peptide	859.444	-0.2	430.729	2	16118	392	399
trypsin	K.GFTDPPVK.H	T peptide	859.444	0.3	430.729	2	16732	392	399
LEP	G.FTDPPVK.H	non-specific cleavage	802.423	-0.1	402.219	2	19340	393	399
LEP	F.TDPPVK.H	non-specific cleavage	655.354	1	328.685	2	19365	394	399
v8	H.QSANLLVR.K	non-specific cleavage	899.519	0	450.767	2	17147	402	409
trypsin	Q.SANLLVR.K	non specific cleavage	771.46	0.4	386.738	2	17214	403	409
LEP	Q.SANLLVRK.N	non-specific cleavage	899.555	1.3	450.786	2	11410	403	410
LEP	K.NINDLTREEVLNLREAFHK.F	L peptide	2310.21	2.7	463.05	5	41795	411	429
LEP	K.NINDLTREEVLNLR.E	non-specific cleavage	1697.91	2.6	566.977	3	37588	411	424
LEP	K.NINDLTREEVLNLREA.F	non-specific cleavage	1897.99	2.6	633.671	3	39170	411	426
trypsin	K.NINDLTR.E	T peptide	844.44	1.9	423.228	2	12168	411	417
trypsin	N.INDLTR.E	non specific cleavage	730.397	0.8	366.206	2	11781	412	417
LEP	I.NDLTREEVLNLREAFHK.F	non-specific cleavage	2083.08	3.4	695.37	3	41839	413	429
v8	R.EEVLNLR.E	G peptide	871.476	0.2	436.745	2	20747	418	424
trypsin	R.E(-18.01)EVLNLR.E	Pyro-glu from E	853.466	0.3	427.74	2	21589	418	424
trypsin	R.EEVLNLR.E	T peptide	871.476	1	436.746	2	22135	418	424
trypsin	E.VLNLR.E	non specific cleavage	613.391	-0.5	307.703	2	21684	420	424
LEP	K.FQEDRSVDGYQATAEYHGLPARC(+57.02)PRPDAK.D	Carbamidomethylation	3333.56	0.7	667.719	5	21681	430	458
LEP	K.FQEDRSVDGYQATAEYH.G	non-specific cleavage	2014.87	1.3	1008.44	2	20232	430	446
LEP	K.FQEDRSVDGYQATAEYHGLPAR.C	non-specific cleavage	2509.16	1.8	837.396	3	24652	430	451
LEP	K.FQEDRSVDGYQATAEYHGLPARC(+57.02)PRPD.A	non-specific cleavage, Carbamidomethylation	3134.43	2.5	627.894	5	24009	430	456
LEP	Q.EDRSVDGYQATAEYHGLPARC(+57.02)PRPDAK.D	non-specific cleavage, Carbamidomethylation	3058.43	1.9	765.617	4	21605	432	458
v8	R.SVDGYQATAEYHGLPAR.C	G peptide	1833.86	1.6	612.296	3	20356	435	451
trypsin	R.SVDGYQATAEYH.G	non specific cleavage	1339.57	2.5	670.793	2	14343	435	446
LEP	R.SVDGYQATAEYHGLPARC(+57.02)PRPDAK.D	non-specific cleavage, Carbamidomethylation	2658.26	1.7	665.574	4	20139	435	458
trypsin	R.SVDGYQATAEYHGLPAR.C	T peptide	1833.86	-2.5	917.937	2	21400	435	451
trypsin	V.DGYQATAEYHGLPAR.C	non specific cleavage	1647.76	-2.5	824.887	2	21442	437	451
trypsin	D.GYQATAEYHGLPAR.C	non specific cleavage	1532.74	-0.5	767.375	2	21474	438	451
trypsin	G.YQATAEYHGLPAR.C	non specific cleavage	1475.72	-5.6	738.861	2	21508	439	451
trypsin	Y.QATAEYHGLPAR.C	non specific cleavage	1312.65	0.4	657.334	2	21472	440	451
trypsin	Q.ATAEYHGLPAR.C	non specific cleavage	1184.59	3.3	593.306	2	21503	441	451
LEP	Q.ATAEYHGLPARC(+57.02)PRPDAK.D	non-specific cleavage, Carbamidomethylation	2008.99	-0.9	670.67	3	21640	441	458
trypsin	A.TAEYHGLPAR.C	non specific cleavage	1113.56	5.1	557.788	2	21557	442	451
trypsin	T.AEYHGLPAR.C	non specific cleavage	1012.51	1.2	507.262	2	10530	443	451
trypsin	E.YHGLPAR.C	non specific cleavage	812.429	1.2	407.222	2	9296	445	451
trypsin	M.PIFPHWHR.L	non specific cleavage	1088.57	-1.3	545.29	2	28939	469	476
trypsin	P.IFPHWHR.L	non specific cleavage	991.514	1.2	496.765	2	20318	470	476
trypsin	H.RLFVTQVEDALVGR.G	non specific cleavage	1601.89	1	534.971	3	41941	476	489
trypsin	R.LFVT(-18.01)QVEDALVGR.G	Dehydration	1427.78	0.2	714.896	2	49433	477	489
LEP	R.LFVTQVEDALVGR.G	non-specific cleavage	1445.79	1.7	723.902	2	50924	477	489
trypsin	R.LFVTQVEDALVGR.G	T peptide	1445.79	3.9	723.904	2	49827	477	489
trypsin	F.VTQVEDALVGR.G	non specific cleavage	1185.64	4.1	593.827	2	23375	479	489
trypsin	T.QVEDALVGR.G	non specific cleavage	985.519	1.8	493.768	2	16256	481	489
trypsin	Q.VEDALVGR.G	non specific cleavage	857.461	2.2	429.738	2	13290	482	489
LEP	K.TYVDSHGASHTNPFHSSVIAFEENAPHTK.R	L peptide	3179.47	-1.2	795.874	4	28188	520	548
v8	K.TYVDSHGASHTNPFH.S	non-specific cleavage	1668.73	-0.5	418.189	4	11316	520	534
trypsin	F.HSSVIAFEENAPHTK.R	non specific cleavage	1665.81	0.4	556.278	3	16108	534	548
LEP	H.SSVIAFEENAPHTK.R	non-specific cleavage	1528.75	2.4	510.592	3	23590	535	548
LEP	S.SVIAFEENAPHTK.R	non-specific cleavage	1441.72	1.7	481.582	3	22911	536	548
LEP	S.VIAFEENAPHTK.R	non-specific cleavage	1354.69	1.1	452.57	3	19654	537	548
LEP	K.RQIDQRLFK.P	L peptide	1202.69	1.4	301.68	4	14181	549	557
LEP	K.RQIDQRLF.K	non-specific cleavage	1074.59	0.2	359.205	3	21665	549	556
LEP	R.QIDQRLFK.P	non-specific cleavage	1046.59	2.3	524.302	2	19575	550	557
LEP	Q.IDQRLFK.P	non-specific cleavage	918.529	1	460.272	2	14199	551	557
LEP	I.DQRLFK.P	non-specific cleavage	805.445	1.7	403.73	2	19627	552	557
v8	K.PATFGHHTDLFNQILYAFE.Q	G peptide	2220.06	-1	741.028	3	49639	558	576
v8	K.PATFGHHTDLFNQILYAFEQE.D	G peptide	2477.16	-0.5	826.729	3	49828	558	578
v8	E.ITHNTIHAWTGGSE.H	G peptide	1522.72	0.5	762.366	2	14672	589	602
v8	E.ITHNTIHAWTGGSEH.F	non-specific cleavage	1659.78	-0.4	554.265	3	10520	589	603
trypsin	H.FSMSSLHYTAFDPLFYFHHSNVDR.L	non specific cleavage	2917.33	0.8	584.473	5	50041	604	627
v8	F.SMSSLHYTAFDPLFYFHHSNVDR.L	non-specific cleavage	2770.26	0.9	693.573	4	43522	605	627
trypsin	M.SSLHYTAFDPLFYFHHSNVDR.L	non specific cleavage	2552.19	0	511.445	5	43331	607	627
v8	M.SSLHYTAFDPLFYFHHSNVDR.L	non-specific cleavage	2552.19	1.7	639.055	4	41653	607	627
v8	S.SLHYTAFDPLFYFH.H	non-specific cleavage	1756.83	-0.3	586.615	3	49205	608	621
v8	S.SLHYTAFDPLFYFHHSNVDR.L	non-specific cleavage	2465.16	0.1	617.296	4	42120	608	627
trypsin	L.HYTAFDPLFYFHHSNVDR.L	non specific cleavage	2265.04	1.3	567.268	4	40552	610	627
v8	H.YTAFDPLFYFH.H	non-specific cleavage	1419.65	2	710.834	2	49964	611	621
v8	D.PLFYFHHSNVDR.L	G peptide	1530.74	0.3	383.692	4	20201	616	627
v8	R.LWAVWQALQMR.R	G peptide	1400.74	1	701.377	2	49583	628	638
LEP	R.LWAVWQALQMRR.H	non-specific cleavage	1556.84	-2.1	779.426	2	49274	628	639
trypsin	R.LWAVWQALQMR.R	T peptide	1400.74	-0.8	701.376	2	51242	628	638
v8	R.AHC(+57.02)AISLE.H	Carbamidomethylation	899.417	-0.7	450.716	2	16879	645	652
LEP	K.THANAMPNK.I	L peptide	982.466	-1.5	492.239	2	2339	671	679
LEP	K.IYDYENVLHYTYEDLTFGGISLENIEK.M	L peptide	3237.54	3.4	1619.78	2	54608	680	706
trypsin	K.IYDYENVLHYTYEDLTFGGISLENIEK.M	T peptide	3237.54	-0.5	1080.19	3	51236	680	706
v8	E.NVLHYTYE.D	G peptide	1037.48	0.6	519.749	2	19280	685	692
v8	E.NVLHYTYEDLTFGGISLE.N	G peptide	2069.99	1.7	1036.01	2	49193	685	702
LEP	N.VLHYTYEDLTFGGISLENIEK.M	non-specific cleavage	2440.22	1	1221.12	2	51900	686	706
trypsin	H.YTYEDLTFGGISLENIEK.M	non specific cleavage	2091	3.4	1046.51	2	50740	689	706
LEP	Y.TYEDLTFGGISLENIEK.M	non-specific cleavage	1927.94	3.5	964.981	2	52701	690	706
v8	E.DLTFGGISLE.N	G peptide	1050.52	-0.7	526.269	2	50022	693	702
LEP	K.MIHENQQEDRIYAGFLLAGIRTSANVDIFIK.T	L peptide	3561.84	0.2	713.375	5	53838	707	737
LEP	K.MIHENQQEDRIYAGFLLAGIR.T	non-specific cleavage	2473.25	0.5	619.321	4	45979	707	727
LEP	K.MIHENQQEDRIYAGFLLAGIRTS.A	non-specific cleavage	2661.33	-0.5	666.34	4	46478	707	729
trypsin	K.M(+15.99)IHENQQEDR.I	Oxidation (M)	1314.56	3.2	658.29	2	2342	707	716
LEP	K.M(+15.99)IHENQQEDRIYAGFLLAGIRTSANVDIFIK.T	Oxidation (M)	3577.84	0.8	716.575	5	53790	707	737
trypsin	K.MIHENQQEDR.I	T peptide	1298.57	-0.5	650.291	2	2656	707	716
trypsin	K.MIHENQQEDRIYAGFLLAGIR.T	T peptide	2473.25	0.9	619.321	4	44400	707	727
trypsin	R.IYAGFLLAGIR.T	T peptide	1192.7	2.1	597.357	2	50732	717	727
trypsin	Y.AGFLLAGIR.T	non specific cleavage	916.549	1.8	459.283	2	41282	719	727
trypsin	G.FLLAGIR.T	non specific cleavage	788.491	0.6	395.253	2	36888	721	727
LEP	A.GIRTSANVDIFIK.T	non-specific cleavage	1432.8	1	478.609	3	33734	725	737
LEP	G.IRTSANVDIFIK.T	non-specific cleavage	1375.78	-0.4	459.601	3	32570	726	737
trypsin	R.TS(-18.01)ANVDIFIK.T	Dehydration	1088.59	5.8	545.304	2	34110	728	737
v8	R.TSANVDIFIK.T	G peptide	1106.6	5.8	554.309	2	33113	728	737
LEP	R.TSANVDIFIK.T	non-specific cleavage	1106.6	1	554.306	2	36261	728	737
trypsin	R.TSANVDIFIK.T	T peptide	1106.6	1.1	554.307	2	34508	728	737
LEP	S.ANVDIFIK.T	non-specific cleavage	918.518	0	460.266	2	34730	730	737
LEP	K.AGT(-18.01)FAVLGGSK.E	Dehydration	988.534	-1	495.274	2	27885	746	756
LEP	K.AGTFAVLGGSK.E	L peptide	1006.54	0.6	504.28	2	28444	746	756
trypsin	K.AGTFAVLGGSK.E	T peptide	1006.54	0	504.28	2	25666	746	756
LEP	A.GTFAVLGGSK.E	non-specific cleavage	935.508	0.6	468.761	2	26987	747	756
LEP	G.TFAVLGGSK.E	non-specific cleavage	878.486	1.4	440.251	2	27923	748	756
LEP	T.FAVLGGSK.E	non-specific cleavage	777.438	-1.6	389.726	2	31590	749	756
LEP	K.WGFDRVFK.F	L peptide	1053.54	1.1	352.188	3	35044	760	767
LEP	W.GFDRVFK.F	non-specific cleavage	867.46	0.8	434.738	2	34601	761	767
LEP	G.FDRVFK.F	non-specific cleavage	810.439	0.5	406.227	2	34650	762	767
LEP	K.FDIT(-18.01)HVLK.D	Dehydration	953.533	2.5	477.775	2	35576	768	775
v8	K.FDITHVLK.D	G peptide	971.544	1.8	486.78	2	32167	768	775
trypsin	K.FDITHVLK.D	T peptide	971.544	2.8	486.781	2	33419	768	775
LEP	K.FDITHVLK.D	T peptide	971.544	0.9	486.78	2	35476	768	775
LEP	F.DITHVLK.D	non-specific cleavage	824.476	2	413.246	2	35492	769	775
LEP	D.ITHVLK.D	non-specific cleavage	709.449	1.3	355.732	2	35523	770	775
v8	E.VTVDITEVDGTK.L	G peptide	1275.66	0.9	638.836	2	25421	787	798
LEP	V.TVDITEVDGTK.L	non-specific cleavage	1176.59	0.3	589.301	2	22235	788	798
trypsin	T.VDITEVDGTK.L	non specific cleavage	1075.54	0.7	538.778	2	17820	789	798
LEP	T.VDITEVDGTK.L	non-specific cleavage	1075.54	2.6	538.779	2	20675	789	798
v8	T.VDITEVDGTK.L	non-specific cleavage	1075.54	0.3	538.777	2	17288	789	798
v8	K.LASSLIPHASVIR.E	G peptide	1362.8	0.5	682.407	2	29200	799	811
LEP	K.LASSLIPHASVIR.E	non-specific cleavage	1362.8	1.5	682.408	2	32610	799	811
LEP	K.LASSLIPHASVIREH.A	non-specific cleavage	1628.9	-0.2	815.457	2	28059	799	813
trypsin	K.LASSLIPHASVIR.E	T peptide	1362.8	1.4	455.274	3	30450	799	811
trypsin	L.ASSLIPHASVIR.E	non specific cleavage	1249.71	1.7	625.865	2	30611	800	811
LEP	L.ASSLIPHASVIREH.A	non-specific cleavage	1515.82	0.3	506.279	3	28091	800	813
trypsin	A.SSLIPHASVIR.E	non specific cleavage	1178.68	0.7	590.346	2	30515	801	811
LEP	A.SSLIPHASVIREH.A	non-specific cleavage	1444.78	2.2	723.398	2	28063	801	813
v8	A.SSLIPHASVIR.E	non-specific cleavage	1178.68	-0.5	590.346	2	29270	801	811
LEP	S.SLIPHASVIREH.A	non-specific cleavage	1357.75	-0.3	679.88	2	28092	802	813
LEP	S.LIPHASVIREH.A	non-specific cleavage	1270.71	0.7	318.686	4	16664	803	813
LEP	L.IPHASVIREH.A	non-specific cleavage	1157.63	-0.5	579.822	2	28069	804	813
trypsin	I.PHASVIR.E	non specific cleavage	778.445	-2.5	390.229	2	30581	805	811
LEP	I.PHASVIREH.A	non-specific cleavage	1044.55	3.4	523.282	2	28048	805	813
LEP	K.N(-17.03)VDRLSPEEMNELRK.A	Ammonia-loss (N)	1811.88	2.3	453.979	4	22152	835	849
LEP	K.NVDRLSPEEMNELRK.A	L peptide	1828.91	0.9	610.644	3	22668	835	849
LEP	K.NVDRLSPEEM(+15.99)NELRK.A	Oxidation (M)	1844.9	1.1	615.976	3	21746	835	849
trypsin	K.NVDRLSPEEMNELRK.A	T peptide	1828.91	1	458.235	4	19894	835	849
LEP	N.VDRLSPEEMNELRK.A	non-specific cleavage	1714.87	-0.1	572.63	3	22164	836	849
LEP	N.VDRLSPEEM(+15.99)NELRK.A	non-specific cleavage, Oxidation (M)	1730.86	0.6	577.962	3	14847	836	849
LEP	V.DRLSPEEMNELRK.A	non-specific cleavage	1615.8	-1.5	539.606	3	22322	837	849
LEP	V.DRLSPEEM(+15.99)NELRK.A	non-specific cleavage, Oxidation (M)	1631.79	1.8	544.939	3	14931	837	849
LEP	D.RLSPEEMNELRK.A	non-specific cleavage	1500.77	2.7	501.266	3	22183	838	849
trypsin	R.LSPEEMNELR.K	T peptide	1216.58	3.4	609.297	2	24045	839	848
trypsin	R.LSPEEMNELRK.A	T peptide	1344.67	-0.4	449.231	3	17999	839	849
LEP	S.PEEMNELRK.A	non-specific cleavage	1144.55	0.9	382.526	3	22178	841	849
LEP	P.EEMNELRK.A	non-specific cleavage	1047.5	-1.7	524.757	2	22218	842	849
LEP	K.ALALLK.E	L peptide	627.432	0.3	314.723	2	27913	850	855
LEP	K.ALALLKEDK.S	L peptide	999.596	1.6	500.806	2	20934	850	858
LEP	K.S(-18.01)AGGFQQLGAFHGEPK.W	Dehydration	1611.78	8	538.271	3	26993	859	874
LEP	K.SAGGFQQLGAFHGEPK.W	L peptide	1629.79	0.4	815.903	2	26842	859	874
trypsin	K.SAGGFQQLGAFHGEPK.W	T peptide	1629.79	0.5	815.903	2	25003	859	874
LEP	S.AGGFQQLGAFHGEPK.W	non-specific cleavage	1542.76	-1	772.385	2	26986	860	874
LEP	A.GGFQQLGAFHGEPK.W	non-specific cleavage	1471.72	1.1	736.869	2	26898	861	874
LEP	G.GFQQLGAFHGEPK.W	non-specific cleavage	1414.7	2.4	708.359	2	26937	862	874
LEP	F.QQLGAFHGEPK.W	non-specific cleavage	1210.61	-3.7	606.31	2	26923	864	874
LEP	K.WC(+57.02)PSPEASK.K	Carbamidomethylation	1060.46	1	531.24	2	14549	875	883
LEP	W.C(+57.02)PSPEASK.K	non-specific cleavage, Carbamidomethylation	874.385	-2.4	438.199	2	2546	876	883
trypsin	M.SVFPHWHR.L	non specific cleavage	1064.53	-2.5	533.271	2	16424	893	900
v8	M.SVFPHWHR.L	non-specific cleavage	1064.53	1.8	533.273	2	15713	893	900
trypsin	R.LLT(-18.01)VQSENALR.R	Dehydration	1224.68	-4.5	613.346	2	24779	901	911
v8	R.LLTVQSENALR.R	G peptide	1242.69	1.9	622.355	2	23624	901	911
LEP	R.LLTVQSENALRR.H	non-specific cleavage	1398.79	0.7	467.272	3	21684	901	912
LEP	R.LLTVQSENALRRH.G	non-specific cleavage	1535.85	0.8	384.971	4	18070	901	913
LEP	R.LLTVQSENALRRHGYDGALPYWDWTSPLNHLPELADHEK.Y	non-specific cleavage	4541.25	2.6	757.885	6	49512	901	939
trypsin	R.LLTVQSENALR.R	T peptide	1242.69	0.5	622.354	2	25072	901	911
trypsin	L.TVQSENALR.R	non specific cleavage	1016.52	-1	509.269	2	24850	903	911
LEP	L.TVQSENALRRHGYDGALPYWDWTSPLNHLPELADHEK.Y	non-specific cleavage	4315.08	5.5	864.029	5	46742	903	939
LEP	R.RHGYDGALPYWDWTSPLNHLPELADHEK.Y	non-specific cleavage	3316.57	2.6	830.152	4	48778	912	939
trypsin	R.RHGYDGALPYWDWTSPLNHLPELADHEK.Y	T peptide	3316.57	-3.3	830.147	4	47439	912	939
trypsin	R.HGY(-18.01)DGALPYWDWTSPLNHLPELADHEK.Y	Dehydration	3142.46	-0.2	786.621	4	50093	913	939
v8	R.HGYDGALPYWDWTSPLNHLPE.L	G peptide	2467.12	-0.8	823.381	3	49219	913	933
trypsin	R.HGYDGALPYWDWTSPLNHLPELADHEK.Y	T peptide	3160.47	0.3	1054.5	3	50133	913	939
trypsin	L.PYWDWTSPLNHLPELADHEK.Y	non specific cleavage	2447.15	2.4	612.797	4	50161	920	939
LEP	K.YVDPEDGVEK.H	L peptide	1149.52	1.8	575.768	2	14983	940	949
trypsin	K.YVDPEDGVEK.H	T peptide	1149.52	0.4	575.767	2	12795	940	949
LEP	K.HNPWFDGHIDTVDK.T	L peptide	1679.77	2.1	560.932	3	28364	950	963
trypsin	K.HNPWFDGHIDTVDK.T	T peptide	1679.77	1.7	560.931	3	26077	950	963
LEP	N.PWFDGHIDTVDK.T	non-specific cleavage	1428.67	1.7	715.342	2	28071	952	963
LEP	W.FDGHIDTVDK.T	non-specific cleavage	1145.54	2.5	573.776	2	27998	954	963
LEP	F.DGHIDTVDK.T	non-specific cleavage	998.467	4.3	500.243	2	28030	955	963
LEP	D.GHIDTVDK.T	non-specific cleavage	883.44	-3.5	442.726	2	2692	956	963
LEP	K.LFEQPEFGHYTSIAK.Q	L peptide	1765.87	-0.3	883.941	2	34806	973	987
trypsin	K.LFEQPEFGHYTSIAK.Q	T peptide	1765.87	1.8	589.631	3	32990	973	987
LEP	L.FEQPEFGHYTSIAK.Q	non-specific cleavage	1652.78	4.1	827.402	2	34949	974	987
LEP	F.EQPEFGHYTSIAK.Q	non-specific cleavage	1505.71	1.1	753.866	2	34833	975	987
v8	E.FGHYTSIAK.Q	G peptide	1022.52	0.4	341.847	3	9931	979	987
v8	E.IAHNYIHALVGGAQPYGM(+15.99)ASLR.Y	Oxidation (M)	2354.2	-8.8	589.551	4	28844	1007	1028
trypsin	N.YIHALVGGAQPYGMASLR.Y	non specific cleavage	1902.98	1	635.334	3	34645	1011	1028
trypsin	H.ALVGGAQPYGMASLR.Y	non specific cleavage	1489.77	2.5	745.895	2	33467	1014	1028
trypsin	H.ALVGGAQPYGM(+15.99)ASLR.Y	non specific cleavage, Oxidation (M)	1505.77	2	753.892	2	33643	1014	1028
LEP	H.ALVGGAQPYGMASLR.Y	non-specific cleavage	1489.77	4.1	745.896	2	35516	1014	1028
v8	H.ALVGGAQPYGMASLR.Y	non-specific cleavage	1489.77	1.9	745.894	2	32500	1014	1028
v8	H.ALVGGAQPYGM(+15.99)ASLR.Y	non-specific cleavage, Oxidation (M)	1505.77	-1	753.889	2	24152	1014	1028
v8	Y.GM(+15.99)ASLR.Y	non specific cleavage, Oxidation (M)	649.322	1.9	325.669	2	3047	1023	1028
LEP	S.LRYTAFDPLFYLHH.S	non-specific cleavage	1791.91	1.8	598.312	3	49283	1027	1040
trypsin	R.YT(-18.01)AFDPLFYLHHSNTDR.I	Dehydration	2077.96	-1.4	520.498	4	43193	1029	1045
v8	R.YTAFDPLFYLHHSNTDR.I	G peptide	2095.98	-0.3	1048.99	2	41510	1029	1045
trypsin	R.YTAFDPLFYLHHSNTDR.I	T peptide	2095.98	1.7	525.002	4	43121	1029	1045
trypsin	Y.TAFDPLFYLHHSNTDR.I	non specific cleavage	1932.91	-7.2	645.307	3	43209	1030	1045
v8	Y.TAFDPLFYLHHSNTDR.I	non-specific cleavage	1932.91	-6.4	645.307	3	41498	1030	1045
v8	T.AFDPLFYLHHSNTDR.I	non-specific cleavage	1831.86	4.4	611.631	3	41547	1031	1045
LEP	K.PYNVANC(+57.02)AVTSMREPLQPFGLSANINTDHVTK.E	Carbamidomethylation	3543.72	1.7	1182.25	3	44276	1060	1091
v8	K.PYNVANC(+57.02)AVTSMR.E	Carbamidomethylation	1481.68	1.3	741.846	2	21967	1060	1072
LEP	K.PYNVANC(+57.02)AVTSM(+15.99)REPLQPFGLSANINTDHVTK.E	Carbamidomethylation; Oxidation (M)	3559.72	0.3	890.937	4	39892	1060	1091
v8	Y.NVANC(+57.02)AVTSMR.E	non-specific cleavage, Carbamidomethylation	1221.56	0.1	611.787	2	13854	1062	1072
LEP	A.NC(+57.02)AVTSMREPLQPFGLSANINTDHVTK.E	non-specific cleavage, Carbamidomethylation	2999.46	0.8	750.873	4	39528	1065	1091
LEP	N.C(+57.02)AVTSMREPLQPFGLSANINTDHVTK.E	non-specific cleavage, Carbamidomethylation	2885.42	2.6	722.363	4	39363	1066	1091
LEP	N.C(+57.02)AVTSM(+15.99)REPLQPFGLSANINTDHVTK.E	non-specific cleavage, Carbamidomethylation; Oxidation (M)	2901.41	0.1	726.36	4	35509	1066	1091
LEP	C.AVTSMREPLQPFGLSANINTDHVTK.E	non-specific cleavage	2725.39	1.3	909.47	3	38523	1067	1091
LEP	T.SMREPLQPFGLSANINTDHVT.K	non-specific cleavage	2326.14	0.4	776.387	3	42054	1070	1090
LEP	T.SMREPLQPFGLSANINTDHVTK.E	non-specific cleavage	2454.23	0.3	819.085	3	36269	1070	1091
LEP	T.SM(+15.99)REPLQPFGLSANINTDHVTK.E	non-specific cleavage, Oxidation (M)	2470.23	3.2	618.566	4	33788	1070	1091
LEP	S.MREPLQPFGLSANINTDHVTK.E	non-specific cleavage	2367.2	0	790.074	3	35830	1071	1091
LEP	S.M(+15.99)REPLQPFGLSANINTDHVTK.E	non-specific cleavage, Oxidation (M)	2383.2	-0.3	795.405	3	33779	1071	1091
LEP	M.REPLQPFGLSANINTDHVTK.E	non-specific cleavage	2236.16	-0.2	560.047	4	33454	1072	1091
v8	R.EPLQPFGLSANINTDHVTK.E	G peptide	2080.06	1.5	694.361	3	35615	1073	1091
trypsin	R.EPLQPFGLSANINTDHVT.K	non-specific cleavage	1951.96	1.5	976.991	2	43824	1073	1090
trypsin	R.EPLQPFGLSANINTDHVTK.E	T peptide	2080.06	0.4	1041.04	2	37129	1073	1091
trypsin	Q.PFGLSANINTDHVTK.E	non-specific cleavage	1612.82	4.8	807.422	2	37182	1077	1091
LEP	F.GLSANINTDHVTK.E	non-specific cleavage	1368.7	1.7	685.358	2	16602	1079	1091
trypsin	F.GLSANINTDHVT.K	non-specific cleavage	1240.6	1	621.31	2	19751	1079	1090
trypsin	L.SANINTDHVTK.E	non-specific cleavage	1198.59	2.5	600.306	2	13857	1081	1091
LEP	K.EHSVPFN(-17.03)VFDYK.T	Ammonia-loss (N)	1463.67	0.1	488.898	3	39369	1092	1103
LEP	K.EHSVPFNVFDYK.T	L peptide	1480.7	3	494.575	3	39266	1092	1103
LEP	K.EHSVPFNVF.D	non-specific cleavage	1074.51	0.5	538.264	2	43733	1092	1100
LEP	H.SVPFNVFDYK.T	non-specific cleavage	1214.6	1.7	608.307	2	45615	1094	1103
v8	H.SVPFNVFDYK.T	non-specific cleavage	1214.6	0.4	608.306	2	42178	1094	1103
LEP	V.PFNVFDYK.T	non-specific cleavage	1028.5	1.2	515.256	2	45665	1096	1103
LEP	F.NVFDYK.T	non-specific cleavage	784.375	0.8	393.195	2	20911	1098	1103
LEP	K.TNFNYEYDTLEFNGLSISQLNK.K	L peptide	2609.23	2.3	1305.62	2	53775	1104	1125
LEP	L.EFNGLSISQLNK.K	non-specific cleavage	1348.7	-2.8	675.355	2	37418	1114	1125
v8	E.FN(-17.03)GLSISQLNK.K	Ammonia-loss (N)	1202.63	-2.4	602.321	2	31613	1115	1125
v8	E.FNGLSISQLNK.K	G peptide	1219.66	0.6	610.836	2	32340	1115	1125
LEP	F.NGLSISQLNK.K	non-specific cleavage	1072.59	1.1	537.302	2	25738	1116	1125
LEP	G.LSISQLNK.K	non-specific cleavage	901.523	0.4	451.769	2	23537	1118	1125
v8	K.SQDRFFAGFLLSGFK.K	G peptide	1718.88	0.7	573.967	3	49132	1132	1146
LEP	K.SQDRFFAGFLLSGFK.K	L peptide	1718.88	1	573.967	3	54120	1132	1146
LEP	K.SQDRFFAG.F	non-specific cleavage	926.425	0.7	464.22	2	21973	1132	1139
trypsin	K.SQDRFFAGFLLSGFK.K	T peptide	1718.88	0.7	573.967	3	50795	1132	1146
v8	R.FFAGFLLSGFK.K	G peptide	1232.66	3.2	617.339	2	49928	1136	1146
LEP	R.FFAGFLLSGFK.K	non-specific cleavage	1232.66	-0.3	617.337	2	54907	1136	1146
trypsin	R.FFAGFLLSGFK.K	T peptide	1232.66	1	617.337	2	51587	1136	1146
LEP	F.FAGFLLSGFK.K	non-specific cleavage	1085.59	1.7	543.804	2	51956	1137	1146
LEP	F.AGFLLSGFK.K	non-specific cleavage	938.523	1.3	470.269	2	43556	1138	1146
LEP	A.GFLLSGFK.K	non-specific cleavage	867.485	1.9	434.751	2	42452	1139	1146
LEP	G.FLLSGFK.K	non-specific cleavage	810.464	0.7	406.24	2	39637	1140	1146
LEP	F.LLSGFK.K	non-specific cleavage	663.395	2.2	332.706	2	21448	1141	1146
trypsin	F.LLSGFK.K	non-specific cleavage	663.395	0	332.705	2	18866	1141	1146
LEP	K.FNIC(+57.02)TDSSNC(+57.02)HPAGEFYLLGDENEMPWAYDRVFK.Y	Carbamidomethylation	4081.77	0.9	1361.6	3	53737	1153	1186
v8	K.FNIC(+57.02)TDSSNC(+57.02)HPAGE.F	Carbamidomethylation	1707.66	-0.1	854.838	2	18776	1153	1167
LEP	K.FNIC(+57.02)TDSSNC(+57.02)HPAGEFYLLGDENEM(+15.99)PWAYDRVFK.Y	Carbamidomethylation; Oxidation (M)	4097.77	-1.1	1025.45	4	51129	1153	1186
LEP	K.FNIC(+57.02)TDSSNC(+57.02)HPAGEFYLLGDENEMPWAYDR.V	non-specific cleavage, Carbamidomethylation	3707.54	0	1236.85	3	53706	1153	1183
LEP	L.GDENEMPWAYDRVFK.Y	non-specific cleavage	1855.82	2	619.615	3	40931	1172	1186
v8	E.NEMPWAYDR.V	G peptide	1180.5	5.8	591.259	2	26277	1175	1183
LEP	K.YDITEKLHDLK.L	L peptide	1373.72	-0.1	458.914	3	26039	1187	1197
LEP	K.LHDLK.L	L peptide	624.36	-1.4	313.187	2	2408	1193	1197
LEP	K.LHAED(-18.01)HFYIDYEVFDLK.P	Dehydration	2135	-2.9	712.672	3	46243	1198	1214
LEP	K.LHAEDHFYIDYEVFDLK.P	L peptide	2153.01	0.4	1077.51	2	46958	1198	1214
LEP	K.LHAEDHFYIDYEVFDLKPA.S	non-specific cleavage	2321.1	4.2	581.285	4	48655	1198	1216
v8	E.DHFYIDYE.V	G peptide	1100.45	0	551.23	2	30867	1202	1209
LEP	H.FYIDYEVFDLK.P	non-specific cleavage	1450.7	1	726.359	2	54244	1204	1214
LEP	K.PASLGKDLFK.Q	L peptide	1074.61	1	359.21	3	26073	1215	1224
LEP	K.QPSVIHEPRIGHHEGEVYQAEVTSANRIRK.N	L peptide	3436.77	2.3	688.363	5	19611	1225	1254
LEP	K.Q(-17.03)PSVIHEPRIGHHEGEVYQAEVTSANRIRK.N	Pyro-glu from Q	3419.74	2	684.958	5	23508	1225	1254
trypsin	K.Q(-17.03)PSVIHEPR.I	Pyro-glu from Q	1044.54	-0.6	523.274	2	8623	1225	1233
trypsin	Q.PSVIHEPR.I	non-specific cleavage	933.503	-1.9	467.758	2	8624	1226	1233
trypsin	R.IGHHEGEVYQAEVTSANR.I	T peptide	1995.94	1.2	998.978	2	11384	1234	1251
LEP	H.HEGEVYQAEVTSANRIRK.N	non-specific cleavage	2086.06	1.5	522.522	4	14789	1237	1254
LEP	A.EVTSANRIRK.N	non-specific cleavage	1172.66	-2.4	391.894	3	2510	1245	1254
trypsin	R.KNIENLSLGELESLR.A	T peptide	1713.93	-0.8	572.316	3	39511	1254	1268
LEP	K.NIENLSLGELESLRAAFLEIENDGTYESIAK.F	L peptide	3437.72	-2.8	860.435	4	55024	1255	1285
LEP	K.NIENLSLGELESL.R	non-specific cleavage	1429.73	1.5	715.873	2	54844	1255	1267
LEP	K.NIENLSLGELESLR.A	non-specific cleavage	1585.83	2.2	793.925	2	49226	1255	1268
LEP	K.NIENLSLGELESLRA.A	non-specific cleavage	1656.87	-0.2	553.297	3	50631	1255	1269
LEP	K.NIENLSLGELESLRAA.F	non-specific cleavage	1727.91	1.9	576.977	3	50795	1255	1270
trypsin	K.NIENLSLGELESLRAAFLEIENDGTYESIAK.F	T peptide	3437.72	2.8	1146.92	3	51831	1255	1285
trypsin	K.NIENLSLGELESLR.A	T peptide	1585.83	-1	793.922	2	47525	1255	1268
LEP	N.IENLSLGELESLR.A	non-specific cleavage	1471.79	2.3	736.903	2	47243	1256	1268
LEP	N.IENLSLGELESLRAAFLEIENDGTYESIAK.F	non-specific cleavage	3323.68	-5.4	1108.89	3	54962	1256	1285
trypsin	N.IENLSLGELESLR.A	non-specific cleavage	1471.79	-0.1	736.901	2	45265	1256	1268
trypsin	N.LSLGELESLR.A	non-specific cleavage	1115.62	1.8	558.818	2	41872	1259	1268
trypsin	S.LGELESLR.A	non-specific cleavage	915.503	0.5	458.759	2	23151	1261	1268
LEP	L.RAAFLEIENDGTYESIAK.F	non-specific cleavage	2026	2.3	676.342	3	36750	1268	1285
LEP	R.AAFLEIENDGTYESIAK.F	non-specific cleavage	1869.9	4.9	935.962	2	42794	1269	1285
trypsin	R.AAFLEIENDGTYESIAK.F	T peptide	1869.9	-0.5	935.957	2	40916	1269	1285
LEP	A.AFLEIENDGTYESIAK.F	non-specific cleavage	1798.86	0.9	900.439	2	41756	1270	1285
LEP	A.FLEIENDGTYESIAK.F	non-specific cleavage	1727.83	0.4	864.92	2	38478	1271	1285
LEP	H.RLYVVVVENALLK.K	non-specific cleavage	1514.92	5.1	505.983	3	45242	1315	1327
LEP	R.LYVVVVENALLK.K	non-specific cleavage	1358.82	1.1	680.417	2	52230	1316	1327
trypsin	R.LYVVVVENALLK.K	T peptide	1358.82	1	680.417	2	50039	1316	1327
LEP	Y.VVVVENALLK.K	non-specific cleavage	1082.67	1.7	542.343	2	35719	1318	1327
v8	K.GSSVAVPYWDWTK.R	G peptide	1494.71	2.7	748.366	2	42289	1329	1341
LEP	K.GSSVAVPYWDWTK.R	L peptide	1494.71	0	748.364	2	46155	1329	1341
trypsin	K.GSSVAVPYWDWTK.R	T peptide	1494.71	2.2	748.366	2	44287	1329	1341
LEP	G.SSVAVPYWDWTK.R	non-specific cleavage	1437.69	0.2	719.854	2	46123	1330	1341
LEP	S.SVAVPYWDWTK.R	non-specific cleavage	1350.66	1.7	676.339	2	46271	1331	1341
v8	S.SVAVPYWDWTK.R	non-specific cleavage	1350.66	2	676.339	2	42701	1331	1341
LEP	S.VAVPYWDWTK.R	non-specific cleavage	1263.63	0.5	632.822	2	48114	1332	1341
LEP	V.AVPYWDWTK.R	non-specific cleavage	1164.56	-1	583.287	2	41098	1333	1341
LEP	K.RIEHLPHLISDATYYNSRQHHYETNPFHHGK.I	L peptide	3796.84	8.1	633.818	6	24220	1342	1372
LEP	K.RIEHLPHLISDATYYNSR.Q	non-specific cleavage	2184.11	2	547.035	4	27783	1342	1359
LEP	K.RIEHLPHLISDATYYNSRQH.H	non-specific cleavage	2449.23	2.9	490.854	5	25175	1342	1361
trypsin	K.RIEHLPHLISDATYYNSR.Q	T peptide	2184.11	1.4	729.044	3	25884	1342	1359
trypsin	R.IEHLPHLISDATYYN(-17.03)SR.Q	Ammonia-loss (N)	2010.98	4.8	671.337	3	31247	1343	1359
v8	R.IEHLPHLISDATYYNSR.Q	G peptide	2028.01	3.7	677.012	3	28280	1343	1359
trypsin	R.IEHLPHLISDATYYNSR.Q	T peptide	2028.01	2.1	508.01	4	30049	1343	1359
LEP	H.LISDATYYNSRQHHYETNPFHHGK.I	non-specific cleavage	2914.35	0.8	729.596	4	17187	1349	1372
trypsin	H.LISDATYYNSR.Q	non-specific cleavage	1301.63	-2.1	651.818	2	18732	1349	1359
trypsin	R.Q(-17.03)HHYETNPFHHGK.I	Pyro-glu from Q	1613.71	1.3	404.436	4	6386	1360	1372
LEP	K.ITHENEITTRDPK.D	L peptide	1552.78	-0.4	389.203	4	6270	1373	1385
LEP	K.ITHENEITTRD.P	non-specific cleavage	1327.64	6	664.83	2	7090	1373	1383
trypsin	K.ITHENEITTR.D	T peptide	1212.61	-2.2	607.311	2	5051	1373	1382
trypsin	K.ITHENEITTRDPK.D	T peptide	1552.78	-0.8	518.602	3	5126	1373	1385
LEP	I.THENEITTRDPK.D	non-specific cleavage	1439.7	-0.4	720.857	2	6292	1374	1385
LEP	T.HENEITTRDPK.D	non-specific cleavage	1338.65	0.2	447.225	3	6250	1375	1385
LEP	H.ENEITTRDPK.D	non-specific cleavage	1201.59	-0.9	601.804	2	6276	1376	1385
LEP	I.TTRDPK.D	non-specific cleavage	716.382	-1.2	359.198	2	6242	1380	1385
v8	K.DSLFHSDYFYE.Q	G peptide	1421.58	0	711.796	2	41819	1386	1396
v8	E.QVLYALE.Q	G peptide	834.449	0	418.232	2	34758	1397	1403
LEP	H.NALHSLLGGK.G	non-specific cleavage	1008.57	1.8	505.294	2	22961	1419	1428
LEP	K.YSMSNLDYAAFDPVFFLH.H	non-specific cleavage	2135.97	1.6	1068.99	2	55487	1431	1448
LEP	K.YSMSNLDYAAFDPVFFLHH.A	non-specific cleavage	2273.03	-1.1	758.682	3	54748	1431	1449
v8	K.YSMSNLDYAAFDPVFFLHH.A	non-specific cleavage	2273.03	1.6	758.683	3	49777	1431	1449
trypsin	K.YSMSNLDYAAFDPVFFLHH.A	non-specific cleavage	2273.03	2.2	758.684	3	51434	1431	1449
trypsin	K.YSMSNLDYAAFDPVFFLHHATTD.R	non-specific cleavage	2661.18	-0.3	888.068	3	51273	1431	1453
LEP	K.YSM(+15.99)SNLDYAAFDPVFFLH.H	non-specific cleavage, Oxidation (M)	2151.96	3	1076.99	2	55231	1431	1448
trypsin	K.YSM(+15.99)SNLDYAAFDPVFFLHHATTDR.I	Oxidation (M)	2833.28	0.4	709.328	4	50405	1431	1454
trypsin	K.YSMSNLDYAAFDPVFFLHHATTDR.I	T peptide	2817.29	0	1409.65	2	50700	1431	1454
trypsin	Y.SMSNLDYAAFDPVFFLHHATTDR.I	non-specific cleavage	2654.22	-0.1	885.748	3	50543	1432	1454
trypsin	Y.SMSNLDYAAFDPVFFLH.H	non-specific cleavage	1972.9	-0.2	987.458	2	52081	1432	1448
v8	Y.SM(+15.99)SNLDYAAFDPVFFLH.H	non-specific cleavage, Oxidation (M)	1988.9	1.6	995.458	2	50192	1432	1448
trypsin	Y.SM(+15.99)SNLDYAAFDPVFFLHHATTDR.I	non-specific cleavage, Oxidation (M)	2670.22	1.2	668.562	4	50295	1432	1454
LEP	M.SNLDYAAFDPVFFLH.H	non-specific cleavage	1754.83	-0.9	878.422	2	55302	1434	1448
v8	M.SNLDYAAFDPVFFLH.H	non-specific cleavage	1754.83	-7.5	878.416	2	50277	1434	1448
trypsin	M.SNLDYAAFDPVFFLHHATTDR.I	non-specific cleavage	2436.15	1.9	610.046	4	50365	1434	1454
trypsin	M.SNLDYAAFDPVFFLH.H	non-specific cleavage	1754.83	2.3	878.424	2	51990	1434	1448
trypsin	M.SNLDYAAFDPVFFLHH.A	non-specific cleavage	1891.89	0.8	631.638	3	51166	1434	1449
trypsin	S.NLDYAAFDPVFFLHHATTDR.I	non-specific cleavage	2349.12	-1.3	588.286	4	50471	1435	1454
LEP	L.DYAAFDPVFFLH.H	non-specific cleavage	1440.67	0.9	721.344	2	55491	1437	1448
trypsin	L.DYAAFDPVFFLHHATTDR.I	non-specific cleavage	2121.99	0.6	708.338	3	50079	1437	1454
trypsin	Y.AAFDPVFFLHHATTDR.I	non-specific cleavage	1843.9	3.6	615.643	3	43600	1439	1454
trypsin	A.AFDPVFFLHHATTDR.I	non-specific cleavage	1772.86	0.1	591.962	3	42458	1440	1454
LEP	K.RPYREANC(+57.02)AIQLMHTPLQPFDK.S	Carbamidomethylation	2684.33	3.2	672.092	4	35761	1468	1489
v8	R.EANC(+57.02)AIQLMHTPLQPFDK.S	Carbamidomethylation	2112.01	0.7	705.012	3	40561	1472	1489
LEP	R.EANC(+57.02)AIQLMHTPLQPFDK.S	non-specific cleavage, Carbamidomethylation	2112.01	1.3	705.013	3	43956	1472	1489
LEP	A.NC(+57.02)AIQLMHTPLQPFDK.S	non-specific cleavage, Carbamidomethylation	1911.93	0.3	956.974	2	42092	1474	1489
LEP	A.NC(+57.02)AIQLM(+15.99)HTPLQPFDK.S	non-specific cleavage, Carbamidomethylation; Oxidation (M)	1927.93	4.5	964.976	2	35130	1474	1489
LEP	N.C(+57.02)AIQLMHTPLQPFDK.S	non-specific cleavage, Carbamidomethylation	1797.89	0.9	600.305	3	41836	1475	1489
LEP	C.AIQLMHTPLQPFDK.S	non-specific cleavage	1637.86	3.3	819.94	2	40458	1476	1489
LEP	A.IQLMHTPLQPFDK.S	non-specific cleavage	1566.82	3.1	523.283	3	38713	1477	1489
LEP	I.QLMHTPLQPFDK.S	non-specific cleavage	1453.74	0.3	727.877	2	40555	1478	1489
LEP	Q.LMHTPLQPFDK.S	non-specific cleavage	1325.68	4.1	442.902	3	29368	1479	1489
trypsin	L.MHTPLQPFDK.S	non-specific cleavage	1212.6	2.9	607.307	2	22830	1480	1489
v8	M.HTPLQPFDK.S	non-specific cleavage	1081.56	0.4	541.785	2	16224	1481	1489
LEP	H.TPLQPFDK.S	non-specific cleavage	944.497	3.9	473.257	2	24162	1482	1489
v8	H.TPLQPFDK.S	non-specific cleavage	944.497	1	473.256	2	20969	1482	1489
trypsin	H.TPLQPFDK.S	non-specific cleavage	944.497	0.6	473.256	2	21776	1482	1489
LEP	K.THATPHDGFEYQNSFGYAYDNLELNHYSIPQLDHMLQERK.R	L peptide	4778.19	-0.6	956.644	5	46813	1499	1538
LEP	K.THATPHDGFEYQNSFGYAYDNLELNHY.S	non-specific cleavage	3202.37	3.1	801.602	4	41557	1499	1525
LEP	K.THATPHDGFEYQNSFGYAYDNLELNHYSIPQLDH.M	non-specific cleavage	3992.77	1.3	999.2	4	46065	1499	1532
LEP	N.SFGYAYDNLELNHYSIPQLDHMLQERK.R	non-specific cleavage	3280.56	-2.1	821.146	4	47498	1512	1538
LEP	N.SFGYAYDNLELNHYSIPQLDHM(+15.99)LQERK.R	non-specific cleavage, Oxidation (M)	3296.56	2.3	825.148	4	42979	1512	1538
v8	E.LNHYSIPQLDHMLQER.K	G peptide	1992.98	-5.4	499.251	4	34551	1522	1537
LEP	Y.SIPQLDHMLQERK.R	non-specific cleavage	1593.83	-2.4	532.283	3	28977	1526	1538
LEP	H.DRVFAGFLLH.N	non-specific cleavage	1173.63	0.2	392.217	3	43660	1541	1550
LEP	K.DC(+57.02)SHEAGMFSILGGQTEMSFVFDRLYK.L	Carbamidomethylation	3124.41	0.5	1042.48	3	54520	1572	1598
LEP	K.DC(+57.02)SHEAGM(+15.99)FSILGGQTEM(+15.99)SFVFDRLYK.L	Carbamidomethylation; Oxidation (M)	3156.4	-0.6	790.107	4	50282	1572	1598
LEP	K.DC(+57.02)SHEAGMFSILGGQTEM(+15.99)SFVFDRLYK.L	Carbamidomethylation; Oxidation (M)	3140.4	0.2	1047.81	3	53896	1572	1598
LEP	K.DC(+57.02)SHEAGMFSILGGQTEM.S	non-specific cleavage, Carbamidomethylation	1968.8	2.2	985.41	2	53156	1572	1589
LEP	K.DC(+57.02)SHEAGMFSILGGQTEMSFVFDR.L	non-specific cleavage, Carbamidomethylation	2720.17	1	907.731	3	54664	1572	1595
LEP	K.DC(+57.02)SHEAGM(+15.99)FSILGGQTEM(+15.99).S	non-specific cleavage, Carbamidomethylation; Oxidation (M)	2000.79	0	1001.4	2	38779	1572	1589
LEP	K.DC(+57.02)SHEAGM(+15.99)FSILGGQTEM(+15.99)SFVFDR.L	non-specific cleavage, Carbamidomethylation; Oxidation (M)	2752.16	3	918.396	3	49173	1572	1595
LEP	K.DC(+57.02)SHEAGMFSILGGQTEM(+15.99)SFVFDR.L	non-specific cleavage, Carbamidomethylation; Oxidation (M)	2736.16	-0.2	913.061	3	54010	1572	1595
LEP	H.EAGMFSILGGQTEMSFVFDRLYK.L	non-specific cleavage	2625.26	5.2	876.099	3	54797	1576	1598
v8	E.AGMFSILGGQTE.M	G peptide	1209.57	0	605.792	2	47779	1577	1588
v8	E.AGM(+15.99)FSILGGQTE.M	Oxidation (M)	1225.56	0.4	613.79	2	38752	1577	1588
LEP	A.GMFSILGGQTEM(+15.99)SFVFDRLYK.L	non-specific cleavage, Oxidation (M)	2441.18	-0.1	814.732	3	54060	1578	1598
LEP	F.SILGGQTEMSFVFDRLYK.L	non-specific cleavage	2090.05	1.2	697.692	3	52505	1581	1598
trypsin	F.SILGGQTEMSFVFDR.L	non-specific cleavage	1685.81	1.9	843.913	2	48890	1581	1595
LEP	F.SILGGQTEM(+15.99)SFVFDRLYK.L	non-specific cleavage, Oxidation (M)	2106.05	3	703.024	3	45484	1581	1598
LEP	S.ILGGQTEMSFVFDRLYK.L	non-specific cleavage	2003.02	-0.8	668.68	3	50303	1582	1598
LEP	S.ILGGQTEM(+15.99)SFVFDRLYK.L	non-specific cleavage, Oxidation (M)	2019.01	0.5	674.012	3	42901	1582	1598
LEP	G.GQTEM(+15.99)SFVFDRLYK.L	non-specific cleavage, Oxidation (M)	1735.82	1.1	579.616	3	36486	1585	1598
v8	E.M(+15.99)SFVFDR.L	Oxidation (M)	916.411	0	459.213	2	31536	1589	1595
LEP	S.FVFDRLYK.L	non-specific cleavage	1086.59	1.4	544.301	2	34715	1591	1598
LEP	F.VFDRLYK.L	non-specific cleavage	939.518	-0.1	470.766	2	34700	1592	1598
LEP	K.LDITKALK.K	L peptide	900.564	-0.5	301.195	3	25400	1599	1606
v8	D.SHVIHSPTILFE.A	G peptide	1378.72	-1.4	460.582	3	31947	1632	1643
LEP	H.SPTILFEAGTDSAHTDDGHTEPVMIRK.D	non-specific cleavage	2924.4	1.1	585.887	5	32402	1637	1663
LEP	T.ILFEAGTDSAHTDDGHTEPVMIRK.D	non-specific cleavage	2639.26	0.6	660.824	4	27336	1640	1663
v8	E.AGTDSAHTDDGHTEPVMIR.K	G peptide	2008.89	-0.8	670.637	3	13304	1644	1662
v8	E.AGTDSAHTDDGHTEPVM(+15.99)IR.K	Oxidation (M)	2024.89	-0.8	675.969	3	10152	1644	1662
v8	A.GTDSAHTDDGHTEPVMIR.K	non-specific cleavage	1937.85	-0.4	646.958	3	13341	1645	1662
v8	G.TDSAHTDDGHTEPVMIR.K	non-specific cleavage	1880.83	-1	627.951	3	13356	1646	1662
v8	T.DSAHTDDGHTEPVMIR.K	non-specific cleavage	1779.78	2.3	594.27	3	12790	1647	1662
v8	K.DITQLDK.R	G peptide	831.434	0.6	416.724	2	14136	1664	1670
LEP	K.DITQLDK.R	L peptide	831.434	0.7	416.724	2	17308	1664	1670
trypsin	K.DITQLDKR.Q	T peptide	987.535	-0.5	494.774	2	11542	1664	1671
LEP	D.ITQLDK.R	non-specific cleavage	716.407	1.4	359.211	2	17415	1665	1670
LEP	I.TQLDK.R	non-specific cleavage	603.323	-0.5	302.668	2	17430	1666	1670
LEP	K.RQQLSLVK.A	L peptide	970.592	0.4	324.538	3	13727	1671	1678
v8	R.QQLSLVK.A	G peptide	814.491	0.9	408.253	2	16642	1672	1678
LEP	R.QQLSLVK.A	non-specific cleavage	814.491	0	408.253	2	19864	1672	1678
trypsin	R.QQLSLVK.A	T peptide	814.491	0.8	408.253	2	17129	1672	1678
LEP	K.ALESMK.A	L peptide	677.342	1.5	339.679	2	6794	1679	1684
LEP	K.ALESM(+15.99)K.A	Oxidation (M)	693.337	-2.1	347.675	2	2348	1679	1684
LEP	K.ADHSSDGFQAIASFHALPPLC(+57.02)PSPAASK.R	Carbamidomethylation	2878.37	-1.3	1440.19	2	47320	1685	1712
v8	K.ADHSSDGFQAIASFHALPPLC(+57.02)PSPAASK.R	Carbamidomethylation	2878.37	-0.9	720.599	4	43871	1685	1712
LEP	K.ADHSSDGFQAIASFH.A	non-specific cleavage	1588.69	0	795.352	2	33208	1685	1699
v8	K.ADHSSDGFQAIASFH.A	non-specific cleavage	1588.69	0.2	795.353	2	29661	1685	1699
trypsin	K.ADHSSDGFQAIASFH.A	non-specific cleavage	1588.69	0.9	795.353	2	31125	1685	1699
LEP	A.IASFHALPPLC(+57.02)PSPAASK.R	non-specific cleavage, Carbamidomethylation	1862.97	1.3	621.999	3	37671	1695	1712
LEP	A.SFHALPPLC(+57.02)PSPAASK.R	non-specific cleavage, Carbamidomethylation	1678.85	1.1	840.433	2	32387	1697	1712
LEP	S.FHALPPLC(+57.02)PSPAASK.R	non-specific cleavage, Carbamidomethylation	1591.82	0.8	531.614	3	31047	1698	1712
LEP	F.HALPPLC(+57.02)PSPAASK.R	non-specific cleavage, Carbamidomethylation	1444.75	0.7	482.591	3	22560	1699	1712
LEP	H.ALPPLC(+57.02)PSPAASK.R	non-specific cleavage, Carbamidomethylation	1307.69	0.3	436.904	3	29446	1700	1712
LEP	L.PPLC(+57.02)PSPAASK.R	non-specific cleavage, Carbamidomethylation	1123.57	-0.9	562.792	2	47348	1702	1712
LEP	H.RLYTVQFQDSLRK.H	non-specific cleavage	1652.9	2.5	414.233	4	24813	1729	1741
trypsin	R.LYT(-18.01)VQFQDSLR.K	Dehydration	1350.69	7.4	676.359	2	35412	1730	1740
v8	R.LYTVQFQDSLR.K	G peptide	1368.7	1.6	685.36	2	33726	1730	1740
v8	R.LYTVQFQDSLRK.H	G peptide	1496.8	1.5	749.408	2	26383	1730	1741
LEP	R.LYTVQFQDSLRK.H	non-specific cleavage	1496.8	2.8	749.409	2	29727	1730	1741
trypsin	R.LYTVQFQDSLR.K	T peptide	1368.7	2	685.361	2	35885	1730	1740
trypsin	R.LYTVQFQDSLRK.H	T peptide	1496.8	0.6	749.407	2	27636	1730	1741
LEP	L.YTVQFQDSLRK.H	non-specific cleavage	1383.71	2.1	692.866	2	29770	1731	1741
trypsin	L.YTVQFQDSLRK.H	non-specific cleavage	1383.71	1	692.865	2	27669	1731	1741
LEP	Y.TVQFQDSLRK.H	non-specific cleavage	1220.65	2.1	611.334	2	29759	1732	1741
v8	Y.TVQFQDSLRK.H	non-specific cleavage	1220.65	1.7	611.334	2	26410	1732	1741
trypsin	Y.TVQFQDSLRK.H	non-specific cleavage	1220.65	-0.4	611.333	2	27660	1732	1741
LEP	T.VQFQDSLRK.H	non-specific cleavage	1119.6	1.7	560.81	2	29814	1733	1741
trypsin	T.VQFQDSLRK.H	non-specific cleavage	1119.6	-1.1	560.808	2	27704	1733	1741
v8	K.HGAVVGLPYWDWTLPR.S	G peptide	1865.96	1.4	622.994	3	48717	1742	1757
LEP	K.HGAVVGLPYWDWTLPRSELPELLTVSTIHDPETGRDIPNPFIGSK.I	L peptide	5009.57	1.6	835.937	6	54345	1742	1786
LEP	K.HGAVVGLPYWDWTLPRSELPELL.T	non-specific cleavage	2647.38	1.8	883.469	3	54958	1742	1764
LEP	K.HGAVVGLPYWDWTLPRSELPELLT.V	non-specific cleavage	2748.43	2.5	917.152	3	54857	1742	1765
LEP	K.HGAVVGLPYWDWTLPRSELPELLTVS.T	non-specific cleavage	2934.53	1.4	979.185	3	54968	1742	1767
trypsin	K.HGAVVGLPYWDWTLPR.S	T peptide	1865.96	-1.2	933.985	2	50587	1742	1757
trypsin	K.HGAVVGLPYWDWTLPRSELPELLTVSTIHDPETGRDIPNPFIGSK.I	T peptide	5009.57	5.3	1002.93	5	51034	1742	1786
trypsin	H.GAVVGLPYWDWTLPR.S	non specific cleavage	1728.9	2.6	865.459	2	51515	1743	1757
trypsin	Y.WDWTLPR.S	non-specific cleavage	972.482	1	487.249	2	42292	1751	1757
trypsin	R.SELPELLTVSTIHD.P	non specific cleavage	1552.8	5.5	777.411	2	48524	1758	1771
trypsin	R.SELPELLTVSTIHDPETGRDIPNPF.I	non specific cleavage	2776.39	-2.5	926.469	3	50653	1758	1782
trypsin	R.SELPELLTVSTIHDPETGR.D	T peptide	2093.06	4.4	698.698	3	43438	1758	1776
trypsin	R.SELPELLTVSTIHDPETGRDIPNPFIGSK.I	T peptide	3161.62	1.4	1054.88	3	50169	1758	1786
LEP	S.ELPELLTVSTIHDPETGRDIPNPFIGSK.I	non-specific cleavage	3074.59	3.6	769.658	4	52346	1759	1786
trypsin	E.LPELLTVSTIHDPETGR.D	non specific cleavage	1876.99	8.2	626.676	3	43251	1760	1776
trypsin	L.PELLTVSTIHDPETGR.D	non specific cleavage	1763.91	-0.5	882.96	2	43245	1761	1776
v8	E.LLTVSTIHDPETGR.D	G peptide	1537.81	-0.5	769.912	2	23132	1763	1776
v8	L.TVSTIHDPETGR.D	non-specific cleavage	1311.64	-2.9	656.826	2	23164	1765	1776
LEP	V.STIHDPETGRDIPNPFIGSK.I	non-specific cleavage	2180.09	5.7	727.707	3	31910	1767	1786
LEP	S.TIHDPETGRDIPNPFIGSK.I	non-specific cleavage	2093.05	1	524.271	4	31642	1768	1786
v8	R.DIPNPFIGSK.I	G peptide	1086.57	2.2	544.294	2	37605	1777	1786
trypsin	R.DIPNPFIGSK.I	T peptide	1086.57	1.7	544.294	2	39099	1777	1786
LEP	D.IPNPFIGSK.I	non-specific cleavage	971.544	1.2	486.78	2	34431	1778	1786
trypsin	I.PNPFIGSK.I	non specific cleavage	858.46	1	430.238	2	39165	1779	1786
LEP	K.IEFEGENVHTK.R	L peptide	1301.63	1.6	434.883	3	15854	1787	1797
trypsin	K.IEFEGENVH.T	non specific cleavage	1072.48	0.9	537.249	2	20376	1787	1795
trypsin	K.IEFEGENVHTK.R	T peptide	1301.63	1.9	651.821	2	14423	1787	1797
LEP	E.FEGENVHTK.R	non-specific cleavage	1059.5	1.6	530.757	2	16964	1789	1797
LEP	F.EGENVHTK.R	non-specific cleavage	912.43	1.1	457.223	2	17014	1790	1797
LEP	K.RDINRDRLFQGSTK.T	L peptide	1704.9	0.1	341.988	5	11176	1798	1811
LEP	K.THHNWFIEQA.L	non-specific cleavage	1281.59	-0.6	428.203	3	26920	1812	1821
v8	E.QTNYC(+57.02)DFE.V	Carbamidomethylation	1075.39	2.4	538.704	2	20279	1827	1834
v8	E.IMHNGVHTWVGGK.E	G peptide	1434.72	0.2	359.687	4	11055	1839	1851
v8	E.IM(+15.99)HNGVHTWVGGK.E	Oxidation (M)	1450.71	1	484.579	3	8635	1839	1851
v8	M.HNGVHTWVGGK.E	non-specific cleavage	1190.59	-0.5	596.304	2	11125	1841	1851
v8	H.NGVHTWVGGK.E	non-specific cleavage	1053.54	-1.9	527.774	2	11119	1842	1851
LEP	N.GVHTWVGGK.E	non-specific cleavage	939.493	2.7	470.755	2	11108	1843	1851
v8	K.EPYGIGHLHYASYDPLFYIHHSQTDR.I	G peptide	3115.46	1.1	779.872	4	37126	1852	1877
trypsin	K.EPYGIGHLH.Y	non specific cleavage	1021.5	-0.8	341.506	3	16451	1852	1860
trypsin	K.EPYGIGHLHY.A	non specific cleavage	1184.56	-1.3	593.287	2	24620	1852	1861
trypsin	K.EPYGIGHLHYASYDPLFYIH.H	non specific cleavage	2391.13	0.7	598.791	4	46505	1852	1871
LEP	K.EPYGIGHLH.Y	non-specific cleavage	1021.5	-2.4	511.755	2	18983	1852	1860
LEP	K.EPYGIGHLHYASYDPLFYIHH.S	non-specific cleavage	2528.19	1.1	633.056	4	44191	1852	1872
trypsin	K.E(-18.01)PYGIGHLHYASYDPLFYIHHSQTDR.I	Pyro-glu from E	3097.45	-1.4	775.368	4	38237	1852	1877
trypsin	K.EPYGIGHLHYASYDPLFYIHHSQTDR.I	T peptide	3115.46	1.5	1039.49	3	38218	1852	1877
v8	R.IWAIWQSLQR.F	G peptide	1299.71	1.3	650.862	2	47427	1878	1887
trypsin	R.IWAIWQSLQR.F	T peptide	1299.71	0	650.862	2	50265	1878	1887
LEP	R.FRGLSGSEANC(+57.02)AVNLMK.T	non-specific cleavage, Carbamidomethylation	1852.89	-1.3	927.452	2	31011	1888	1904
trypsin	R.GLSGSEANC(+57.02)AVNLMK.T	Carbamidomethylation	1549.72	0.9	775.869	2	27851	1890	1904
v8	R.GLSGSEANC(+57.02)AVNLMK.T	Carbamidomethylation	1549.72	-3.2	775.866	2	26507	1890	1904
trypsin	R.GLSGSEANC(+57.02)AVNLM(+15.99)K.T	Carbamidomethylation; Oxidation (M)	1565.72	-1.9	783.865	2	27432	1890	1904
LEP	R.GLSGSEANC(+57.02)AVNLMK.T	non-specific cleavage, Carbamidomethylation	1549.72	0.1	775.869	2	29954	1890	1904
trypsin	S.EANC(+57.02)AVNLMK.T	non specific cleavage, Carbamidomethylation	1148.53	-3	575.271	2	19403	1895	1904
LEP	S.EANC(+57.02)AVNLMK.T	non-specific cleavage, Carbamidomethylation	1148.53	1.9	575.274	2	21980	1895	1904
v8	E.ANC(+57.02)AVNLMK.T	Carbamidomethylation	1019.49	-1	510.751	2	16756	1896	1904
LEP	K.PFSFGAPYNLNDHTHDFSK.P	L peptide	2192.99	2.2	549.256	4	35681	1909	1927
LEP	K.PFSFGAPYNLNDHTHDFSKPEDTFDYQK.F	L peptide	3316.47	1.8	1106.5	3	39339	1909	1936
LEP	K.PFSFGAPYNLNDHTH.D	non-specific cleavage	1715.77	2.1	572.932	3	36794	1909	1923
LEP	F.SFGAPYNLNDHTHDFSKPEDTFDYQK.F	non-specific cleavage	3072.35	0.9	1025.13	3	32389	1911	1936
v8	F.SFGAPYNLNDHTH.D	non-specific cleavage	1471.65	1	491.557	3	20441	1911	1923
LEP	A.PYNLNDHTHDFSK.P	non-specific cleavage	1586.71	2.5	529.912	3	35604	1915	1927
v8	A.PYNLNDHTHDFSK.P	non-specific cleavage	1586.71	1.1	529.912	3	22152	1915	1927
LEP	N.DHTHDFSKPEDTFDYQK.F	non-specific cleavage	2108.91	0.9	703.977	3	19048	1920	1936
LEP	K.PEDTFDYQK.F	L peptide	1141.49	-1.9	571.753	2	16620	1928	1936
trypsin	K.PEDTFDYQK.F	T peptide	1141.49	2	571.755	2	14199	1928	1936
LEP	K.FGYIYDTLEFAGWSIR.G	non-specific cleavage	1936.94	0.1	646.653	3	54924	1937	1952
trypsin	K.FGYIYDTLEFAGWSIR.G	T peptide	1936.94	2.3	646.654	3	51624	1937	1952
trypsin	D.TLEFAGWSIR.G	non specific cleavage	1178.61	0.1	590.312	2	45469	1943	1952
v8	E.FAGWSIR.G	G peptide	835.434	-1.1	418.724	2	29252	1946	1952
v8	R.GIDHIVR.N	G peptide	808.456	-1.9	405.234	2	8737	1953	1959
trypsin	R.GIDHIVR.N	T peptide	808.456	-1.2	405.235	2	9549	1953	1959
trypsin	G.IDHIVR.N	non specific cleavage	751.434	-2.7	376.723	2	9570	1954	1959
trypsin	F.LLEGFGTSATVDFQVC(+57.02)R.T	non specific cleavage, Carbamidomethylation	1898.92	1.1	950.468	2	45157	1972	1988
v8	E.GFGTSATVDFQVC(+57.02)R.T	Carbamidomethylation	1543.71	3.5	772.864	2	32010	1975	1988
trypsin	S.ATVDFQVC(+57.02)R.T	non specific cleavage, Carbamidomethylation	1094.52	-1	548.266	2	22409	1980	1988
LEP	S.ATVDFQVC(+57.02)RTAGDC(+57.02)EDAGYFTVLGGEK.E	non-specific cleavage, Carbamidomethylation	2965.32	0	989.448	3	44135	1980	2006
LEP	C.RTAGDC(+57.02)EDAGYFTVLGGEK.E	non-specific cleavage, Carbamidomethylation	2044.92	1.5	682.647	3	33614	1988	2006
trypsin	R.TAGDC(+57.02)EDAGYFTVLGGEK.E	Carbamidomethylation	1888.81	-0.9	945.414	2	37801	1989	2006
v8	R.TAGDC(+57.02)EDAGYFTVLGGEK.E	Carbamidomethylation	1888.81	0.6	945.415	2	36140	1989	2006
LEP	R.TAGDC(+57.02)EDAGYFTVLGGEK.E	non-specific cleavage, Carbamidomethylation	1888.81	0.2	945.415	2	39709	1989	2006
v8	E.DAGYFTVLGGEK.E	G peptide	1255.61	-1.8	628.81	2	36806	1995	2006
v8	D.AGYFTVLGGEK.E	G peptide	1140.58	-9.7	571.293	2	32118	1996	2006
trypsin	Y.FTVLGGEK.E	non specific cleavage	849.46	0.3	425.737	2	21025	1999	2006
LEP	Y.FTVLGGEK.E	non-specific cleavage	849.46	-0.9	425.737	2	23498	1999	2006
LEP	K.EMPWAFDRLYK.Y	L peptide	1454.7	2.8	485.909	3	43169	2007	2017
LEP	K.EM(+15.99)PWAFDRLYK.Y	Oxidation (M)	1470.7	-1.4	491.239	3	40924	2007	2017
LEP	K.E(-18.01)MPWAFDRLYK.Y	Pyro-glu from E	1436.69	0.1	479.904	3	43011	2007	2017
v8	E.MPWAFDR.L	G peptide	921.417	2.1	461.717	2	32230	2008	2014
LEP	M.PWAFDRLYK.Y	non-specific cleavage	1194.62	0.9	598.317	2	42977	2009	2017
LEP	P.WAFDRLYK.Y	non-specific cleavage	1097.57	1.5	549.791	2	43036	2010	2017
LEP	W.AFDRLYK.Y	non-specific cleavage	911.486	-3.1	456.749	2	43035	2011	2017
v8	K.YDITETLDK.M	G peptide	1096.53	0.3	549.272	2	24330	2018	2026
LEP	K.YDITETLDK.M	L peptide	1096.53	1.5	549.273	2	27594	2018	2026
trypsin	K.YDITETLDK.M	T peptide	1096.53	0.3	549.272	2	25312	2018	2026
LEP	Y.DITETLDK.M	non-specific cleavage	933.466	2.3	467.741	2	20663	2019	2026
v8	E.VTITSYDGTVLD.S	G peptide	1282.63	-0.1	642.322	2	36438	2039	2050
trypsin	T.SYDGTVLDSGLIPTPSIIYDPAHHDISSH.H	non specific cleavage	3106.49	0.3	777.63	4	50326	2043	2071
v8	I.PTPSIIYDPAHHDISSH.H	non-specific cleavage	1885.9	0.9	629.64	3	40476	2055	2071
LEP	K.VRHDLSTLSERDIGSLK.Y	L peptide	1925.03	2.2	482.267	4	22743	2078	2094
trypsin	K.VRHDLSTLSER.D	T peptide	1311.69	-0.3	438.237	3	8860	2078	2088
trypsin	K.VRHDLSTLSERDIGSLK.Y	T peptide	1925.03	0.9	482.266	4	20450	2078	2094
trypsin	R.HDLS(-18.01)TLSER.D	Dehydration	1038.51	0.1	347.177	3	9535	2080	2088
trypsin	R.HDLSTLSER.D	T peptide	1056.52	0.8	529.268	2	9875	2080	2088
LEP	H.DLSTLSER.D	non-specific cleavage	919.461	-0.2	460.738	2	19008	2081	2088
LEP	H.DLSTLSERDIGSLK.Y	non-specific cleavage	1532.8	1.4	767.411	2	32754	2081	2094
LEP	D.LSTLSERDIGSLK.Y	non-specific cleavage	1417.78	1.1	473.6	3	25316	2082	2094
LEP	S.TLSERDIGSLK.Y	non-specific cleavage	1217.66	1.3	609.839	2	19447	2084	2094
LEP	L.SERDIGSLK.Y	non-specific cleavage	1003.53	-0.1	502.772	2	19480	2086	2094
LEP	K.YALSSLQADTSADGFAAIASFHGLPAK.C	L peptide	2708.34	0.6	678.094	4	52678	2095	2121
trypsin	K.YALSSLQADTSADGFAAIASFH.G	non specific cleavage	2242.05	0.6	1122.04	2	50769	2095	2116
LEP	K.YALSSLQADTSADGFAA.I	non-specific cleavage	1686.77	3.3	844.397	2	45253	2095	2111
LEP	K.YALSSLQADTSADGFAAIASFH.G	non-specific cleavage	2242.05	0.4	748.359	3	54012	2095	2116
trypsin	K.YALSSLQADTSADGFAAIASFHGLPAK.C	T peptide	2708.34	1.3	903.79	3	50246	2095	2121
trypsin	Y.ALSSLQADTSADGFAAIASFHGLPAK.C	non specific cleavage	2545.28	4.4	849.438	3	48610	2096	2121
LEP	Y.ALSSLQADTSADGFAAIASFHGLPAK.C	non-specific cleavage	2545.28	0.3	849.435	3	50046	2096	2121
trypsin	S.SLQADTSADGFAAIASFH.G	non specific cleavage	1807.84	1.6	904.928	2	45832	2099	2116
LEP	S.SLQADTSADGFAAIASFH.G	non-specific cleavage	1807.84	5.3	904.931	2	47626	2099	2116
LEP	S.SLQADTSADGFAAIASFHGLPAK.C	non-specific cleavage	2274.13	2.3	1138.07	2	47047	2099	2121
LEP	A.DTSADGFAAIASFHGLPAK.C	non-specific cleavage	1874.92	1.7	625.98	3	46658	2103	2121
LEP	D.GFAAIASFHGLPAK.C	non-specific cleavage	1385.75	1	462.923	3	38060	2108	2121
LEP	A.AIASFHGLPAK.C	non-specific cleavage	1110.62	0.5	371.214	3	23675	2111	2121
LEP	I.ASFHGLPAK.C	non-specific cleavage	926.497	1.8	464.257	2	20967	2113	2121
LEP	A.SFHGLPAK.C	non-specific cleavage	855.46	-0.2	428.737	2	21000	2114	2121
trypsin	R.LYT(-18.01)LQFEQALR.R	Dehydration	1362.73	-7.1	682.367	2	42793	2146	2156
v8	R.LYTLQFEQALR.R	G peptide	1380.74	0.2	691.377	2	41057	2146	2156
trypsin	R.LYTLQFEQALR.R	T peptide	1380.74	1.5	691.378	2	43215	2146	2156
trypsin	R.LYTLQFEQALRR.H	T peptide	1536.84	-1.3	513.287	3	36494	2146	2157
LEP	R.RHGSSVAVPYWDWTK.P	non-specific cleavage	1787.87	1	596.966	3	33564	2157	2171
v8	R.HGSSVAVPYWDWTK.P	G peptide	1631.77	0.6	544.932	3	36022	2158	2171
LEP	R.HGSSVAVPYWDWTK.P	non-specific cleavage	1631.77	0.7	816.894	2	39541	2158	2171
trypsin	R.HGSSVAVPYWDWTK.P	T peptide	1631.77	0.7	816.894	2	37883	2158	2171
LEP	K.PIHNIPHLFTDK.E	L peptide	1430.77	0.7	716.391	2	26819	2172	2183
trypsin	K.PIHNIPHLFTDK.E	T peptide	1430.77	-1.1	358.699	4	24858	2172	2183
LEP	P.IHNIPHLFTDK.E	non-specific cleavage	1333.71	1.3	445.579	3	26830	2173	2183
LEP	I.HNIPHLFTDK.E	non-specific cleavage	1220.63	-1.9	611.321	2	38410	2174	2183
LEP	H.NIPHLFTDK.E	non-specific cleavage	1083.57	-1.9	542.792	2	26855	2175	2183
LEP	N.IPHLFTDK.E	non-specific cleavage	969.528	2.2	485.772	2	24756	2176	2183
LEP	I.PHLFTDK.E	non-specific cleavage	856.444	0.8	429.23	2	26825	2177	2183
LEP	H.LFTDK.E	non-specific cleavage	622.333	-0.3	312.173	2	11233	2179	2183
v8	K.EYYDVWR.N	G peptide	1029.46	0.2	515.735	2	27126	2184	2190
LEP	K.EYYDVWR.N	non-specific cleavage	1029.46	3.2	515.737	2	30751	2184	2190
trypsin	K.E(-18.01)YYDVWR.N	Pyro-glu from E	1011.45	1.3	506.73	2	28858	2184	2190
LEP	K.EYYDVWRNK.V	T peptide	1271.59	1	636.805	2	23579	2184	2192
trypsin	K.EYYDVWR.N	T peptide	1029.46	2.2	515.736	2	28688	2184	2190
v8	E.YYDVWR.N	G peptide	900.413	-0.3	451.214	2	23943	2185	2190
LEP	Y.YDVWRNK.V	non-specific cleavage	979.487	0.9	490.752	2	23707	2186	2192
LEP	Y.DVWRNK.V	non-specific cleavage	816.424	0.4	409.219	2	23616	2187	2192
LEP	K.VMPNPFARGYVPSHDTYTVR.D	non-specific cleavage	2306.13	-1	577.538	4	33270	2193	2212
trypsin	K.VM(+15.99)PNPFAR.G	Oxidation (M)	946.469	2	474.243	2	24727	2193	2200
v8	R.GYVPSHDTYTVR.D	G peptide	1393.66	0.2	697.839	2	13489	2201	2212
LEP	R.GYVPSHDTYTVR.D	non-specific cleavage	1393.66	2.1	697.84	2	16774	2201	2212
LEP	R.GYVPSHDTYTVRDVQEGLFHLT.S	non-specific cleavage	2533.22	3	634.315	4	43031	2201	2222
trypsin	R.GYVPSHDTYTVR.D	T peptide	1393.66	4.2	465.563	3	14340	2201	2212
trypsin	Y.VPSHDTYTVR.D	non-specific cleavage	1173.58	-0.4	587.796	2	14187	2203	2212
v8	Y.VPSHDTYTVR.D	non-specific cleavage	1173.58	0.8	587.797	2	13533	2203	2212
trypsin	V.PSHDTYTVR.D	non specific cleavage	1074.51	2	538.263	2	15707	2204	2212
trypsin	P.SHDTYTVR.D	non specific cleavage	977.457	-4.7	489.733	2	14212	2205	2212
trypsin	R.DVQEGLFHLTSTGEH.S	non specific cleavage	1668.77	3.9	835.398	2	35644	2213	2227
v8	E.GLFHLTSTGE.H	G peptide	1060.52	0.6	531.267	2	30155	2217	2226
v8	E.HSALLNQALLALE.Q	G peptide	1391.78	0	696.896	2	48090	2227	2239
v8	E.QHDYC(+57.02)DFAVQFE.V	Carbamidomethylation	1557.62	1	779.818	2	36390	2240	2251
v8	E.Q(-17.03)HDYC(+57.02)DFAVQFE.V	Pyro-glu from Q; Carbamidomethylation	1540.59	0.8	771.304	2	44261	2240	2251
trypsin	H.YLVGGPQVYSLSSLHYASYDPIFFIHHSFVDK.V	non specific cleavage	3685.82	-0.4	738.172	5	50507	2259	2290
trypsin	Y.SLSSLHYASYDPIFFIHHSFVDK.V	non specific cleavage	2709.32	0.4	678.338	4	46151	2268	2290
LEP	Y.SLSSLHYASYDPIFFIHHSFVDK.V	non-specific cleavage	2709.32	1.2	678.339	4	47514	2268	2290
v8	Y.SLSSLHYASYDPIFFIHHSFVDK.V	non-specific cleavage	2709.32	-0.8	678.337	4	55095	2268	2290
trypsin	L.SSLHYASYDPIFFIHHSFVDK.V	non specific cleavage	2509.21	-0.5	837.409	3	45983	2270	2290
v8	L.SSLHYASYDPIFFIHHSFVDK.V	non-specific cleavage	2509.21	-2.6	628.307	4	41517	2270	2290
trypsin	S.SLHYASYDPIFFIHHSFVDK.V	non specific cleavage	2422.17	0.8	606.551	4	43094	2271	2290
LEP	S.SLHYASYDPIFFIH.H	non-specific cleavage	1708.83	2.9	570.617	3	49485	2271	2284
LEP	S.SLHYASYDPIFFIHH.S	non-specific cleavage	1845.88	3.5	616.304	3	43587	2271	2285
LEP	S.SLHYASYDPIFFIHHSFVDK.V	non-specific cleavage	2422.17	0.1	606.551	4	44770	2271	2290
LEP	S.LHYASYDPIFFIHHSFVDK.V	non-specific cleavage	2335.14	0.3	584.793	4	44299	2272	2290
trypsin	L.HYASYDPIFFIHHSFVDK.V	non specific cleavage	2222.06	1.6	556.523	4	40761	2273	2290
LEP	L.HYASYDPIFFIHH.S	non-specific cleavage	1645.77	3.8	549.599	3	40149	2273	2285
LEP	L.HYASYDPIFFIHHSFVDK.V	non-specific cleavage	2222.06	0.7	556.522	4	42444	2273	2290
trypsin	H.YASYDPIFFIHH.S	non specific cleavage	1508.71	0.7	503.911	3	44526	2274	2285
LEP	H.YASYDPIFFIHH.S	non-specific cleavage	1508.71	-0.1	503.91	3	46173	2274	2285
LEP	H.YASYDPIFFIHHSFVDK.V	non-specific cleavage	2085	1.6	522.258	4	46676	2274	2290
v8	H.YASYDPIFFIHHSFVDK.V	non-specific cleavage	2085	1.7	522.258	4	43237	2274	2290
trypsin	Y.ASYDPIFFIHH.S	non specific cleavage	1345.65	-1.2	449.555	3	42239	2275	2285
trypsin	Y.ASYDPIFFIHHSFVDK.V	non specific cleavage	1921.94	-1.9	481.49	4	43338	2275	2290
trypsin	A.SYDPIFFIHHSFVDK.V	non specific cleavage	1850.9	-0.5	463.732	4	42844	2276	2290
LEP	A.SYDPIFFIHHSFVDK.V	non-specific cleavage	1850.9	2.7	926.459	2	44617	2276	2290
trypsin	Y.DPIFFIHHSFVDK.V	non specific cleavage	1600.8	-0.6	534.608	3	38744	2278	2290
trypsin	D.PIFFIHHSFVDK.V	non specific cleavage	1485.78	0.8	743.896	2	45994	2279	2290
LEP	D.PIFFIHHSFVDK.V	non-specific cleavage	1485.78	1.1	372.452	4	33379	2279	2290
LEP	K.VWAVWQALQEK.R	L peptide	1356.72	2.3	679.368	2	49897	2291	2301
trypsin	K.VWAVWQALQEK.R	T peptide	1356.72	1.3	679.368	2	48538	2291	2301
LEP	R.GLPSDRADC(+57.02)AVSLMTQN.M	non-specific cleavage, Carbamidomethylation	1833.84	1.9	917.927	2	34473	2303	2319
v8	R.ADC(+57.02)AVSLMTQNMR.P	Carbamidomethylation	1495.66	0.9	748.837	2	28823	2309	2321
trypsin	R.ADC(+57.02)AVSLMTQNM(+15.99)R.P	Carbamidomethylation; Oxidation (M)	1511.65	1.3	756.835	2	30273	2309	2321
LEP	S.LMTQNMRPF.H	non-specific cleavage	1136.55	2.7	569.282	2	31912	2315	2323
LEP	E.INHNQFTK.K	non-specific cleavage	1000.51	2.4	501.263	2	11820	2327	2334
LEP	K.HAVPNDVFK.Y	L peptide	1025.53	2.2	513.773	2	16929	2336	2344
LEP	V.PNDVFK.Y	non-specific cleavage	718.365	3.4	360.191	2	24481	2339	2344
trypsin	K.Y(-18.01)ELLGYR.Y	Dehydration	894.46	3.3	448.239	2	27753	2345	2351
LEP	K.YELLGYRYDNLEIGGMNLHEIEK.E	L peptide	2768.35	-2.1	923.788	3	47115	2345	2367
LEP	K.YELLGYRYD.N	non-specific cleavage	1190.56	0.6	596.288	2	38918	2345	2353
LEP	K.YELLGYRYDNLEIG.G	non-specific cleavage	1716.84	1.5	859.427	2	48586	2345	2358
LEP	K.YELLGYRYDNLEIGGM(+15.99)NLHEIEK.E	Oxidation (M)	2784.34	-2.2	697.091	4	42781	2345	2367
trypsin	K.YELLGYR.Y	T peptide	912.471	-1.5	457.242	2	27638	2345	2351
v8	R.VFAGFLLHGIR.T	G peptide	1228.71	0.4	615.361	2	41124	2378	2388
trypsin	R.VFAGFLLHGIR.T	T peptide	1228.71	0.1	615.361	2	42694	2378	2388
trypsin	V.FAGFLLHGIR.T	non specific cleavage	1129.64	0.1	565.827	2	42722	2379	2388
v8	V.FAGFLLHGIR.T	non-specific cleavage	1129.64	1.7	565.828	2	41153	2379	2388
trypsin	F.AGFLLHGIR.T	non specific cleavage	982.571	-0.8	492.293	2	42720	2380	2388
trypsin	R.TSADVQFQIC(+57.02)K.T	Carbamidomethylation	1295.62	-0.3	648.816	2	25310	2389	2399
v8	R.TSADVQFQIC(+57.02)K.T	Carbamidomethylation	1295.62	0.2	648.816	2	23974	2389	2399
LEP	S.ADVQFQIC(+57.02)K.T	non-specific cleavage, Carbamidomethylation	1107.54	3.6	554.778	2	26503	2391	2399
LEP	K.TSEDC(+57.02)HHGGQIFVLGGTK.E	Carbamidomethylation	1941.9	1.7	971.959	2	23849	2400	2417
trypsin	K.TSEDC(+57.02)HHGGQIFVLGGTK.E	Carbamidomethylation	1941.9	0.5	486.483	4	21596	2400	2417
LEP	C.HHGGQIFVLGGTK.E	non-specific cleavage	1349.72	-0.5	450.914	3	21434	2405	2417
LEP	H.GGQIFVLGGTK.E	non-specific cleavage	1075.6	0.2	538.809	2	34495	2407	2417
LEP	Q.IFVLGGTK.E	non-specific cleavage	833.501	0.1	417.758	2	30866	2410	2417
v8	K.EMAWAYNR.L	G peptide	1039.45	-3.3	520.733	2	20965	2418	2425
LEP	K.EMAWAYNRLFK.Y	L peptide	1427.7	3.3	714.861	2	39482	2418	2428
LEP	K.EMAWAYNR.L	non-specific cleavage	1039.45	1.4	520.735	2	24489	2418	2425
LEP	K.EM(+15.99)AWAYNR.L	non-specific cleavage, Oxidation (M)	1055.45	1	528.732	2	19621	2418	2425
LEP	K.EM(+15.99)AWAYNRLFK.Y	Oxidation (M)	1443.7	-1.3	722.855	2	36326	2418	2428
LEP	K.E(-18.01)MAWAYNRLFK.Y	Pyro-glu from E	1409.69	0.1	470.904	3	39549	2418	2428
LEP	K.E(-18.01)M(+15.99)AWAYNRLFK.Y	Pyro-glu from E; Oxidation (M)	1425.69	2.7	476.237	3	34583	2418	2428
trypsin	K.EMAWAYNR.L	T peptide	1039.45	2.1	520.736	2	22329	2418	2425
v8	E.MAWAYNR.L	G peptide	910.412	0.3	456.213	2	18542	2419	2425
v8	E.M(+15.99)AWAYNR.L	Oxidation (M)	926.407	1.2	464.211	2	14424	2419	2425
LEP	M.AWAYNRLFK.Y	non-specific cleavage	1167.62	3.4	390.215	3	31311	2420	2428
LEP	A.WAYNRLFK.Y	non-specific cleavage	1096.58	0.3	549.298	2	34636	2421	2428
LEP	W.AYNRLFK.Y	non-specific cleavage	910.502	0.5	456.259	2	31363	2422	2428
v8	K.YDITHALHD.A	G peptide	1083.5	-1.3	542.756	2	20922	2429	2437
v8	K.YDITHALHDAHITPE.D	G peptide	1731.82	-1	866.917	2	31889	2429	2443
LEP	K.YDITHALHDAHITPEDVFHPSEPFFIK.V	L peptide	3175.54	2.4	1059.52	3	50608	2429	2455
LEP	K.YDITHALHDA.H	non-specific cleavage	1154.54	0.3	578.275	2	26508	2429	2438
v8	K.YDITHALHDAH.I	non-specific cleavage	1291.59	0.1	431.539	3	18020	2429	2439
trypsin	K.YDITHALHDAHITPEDVFHPSEPFFIK.V	T peptide	3175.54	-1.6	794.891	4	49386	2429	2455
trypsin	H.ALHDAHITPEDVFHPSEPFFIK.V	non specific cleavage	2546.26	0.5	637.572	4	42514	2434	2455
LEP	H.ALHDAHITPEDVFHPSEPFFIK.V	non-specific cleavage	2546.26	0.6	637.572	4	44225	2434	2455
LEP	A.LHDAHITPEDVFHPSEPFFIK.V	non-specific cleavage	2475.22	1.8	619.814	4	43923	2435	2455
LEP	T.PEDVFHPSEPFFIK.V	non-specific cleavage	1687.82	-0.2	563.615	3	43886	2442	2455
v8	E.DVFHPSEPFFIK.V	G peptide	1461.73	2	488.251	3	41995	2444	2455
LEP	D.VFHPSEPFFIK.V	non-specific cleavage	1346.7	1.9	449.909	3	37497	2445	2455
LEP	A.SILHAPTIIYEPGLDHHE.D	non-specific cleavage	2041.03	-4.2	681.347	3	37821	2469	2486
v8	A.SILHAPTIIYEPGLDHHE.D	non-specific cleavage	2041.03	-2.4	511.263	4	34481	2469	2486
v8	E.DHHSSSMAGHGVR.K	G peptide	1376.6	0.3	345.158	4	2407	2487	2499
trypsin	R.KEINTLTTAEVDNLK.D	T peptide	1687.9	2.6	563.642	3	23804	2500	2514
LEP	K.EINT(-18.01)LTTAEVDNLK.D	Dehydration	1541.79	-2.2	771.903	2	33488	2501	2514
LEP	K.EINTLTTAEVD(-18.01)NLK.D	Dehydration	1541.79	2.6	771.906	2	37542	2501	2514
LEP	K.EINTLTTAEVDNLK.D	L peptide	1559.8	3.1	780.912	2	30154	2501	2514
LEP	K.E(-18.01)INTLTTAEVDNLK.D	Pyro-glu from E	1541.79	-0.7	514.938	3	33415	2501	2514
trypsin	K.EINTLTTAEVDNLK.D	T peptide	1559.8	-0.7	780.909	2	31185	2501	2514
trypsin	K.EINTLTTAEVDNLKDAMR.A	T peptide	2033.01	-1.5	678.676	3	37262	2501	2518
LEP	E.INTLTTAEVDNLK.D	non-specific cleavage	1430.76	0.7	716.389	2	30548	2502	2514
LEP	N.TLTTAEVDNLK.D	non-specific cleavage	1203.63	3.4	602.827	2	24092	2504	2514
LEP	K.DAMRAVMADHGPNGYQAIAAFHGNPPMC(+57.02)PMPDGK.N	Carbamidomethylation	3623.6	3.1	906.91	4	40707	2515	2548
LEP	K.DAMRAVMADHGPNGYQA.I	non-specific cleavage	1802.78	-1.4	902.398	2	25238	2515	2531
LEP	K.DAMRAVMADHGPNGYQAIA.A	non-specific cleavage	1986.9	3.3	994.462	2	32673	2515	2533
LEP	K.DAMRAVMADHGPNGYQAIAAFH.G	non-specific cleavage	2342.07	0.9	781.697	3	37977	2515	2536
LEP	M.RAVMADHGPNGYQAIAAFHGNPPMC(+57.02)PMPDGK.N	non specific cleavage, Carbamidomethylation	3306.49	0	662.306	5	33902	2518	2548
trypsin	R.AVMADHGPNGYQAIAAFHGNPPMC(+57.02)PMPDGK.N	Carbamidomethylation	3150.39	0.7	788.606	4	36132	2519	2548
LEP	R.AVMADHGPNGYQAIAAFHGNPPMC(+57.02)PMPDGK.N	non-specific cleavage, Carbamidomethylation	3150.39	1.8	788.607	4	37807	2519	2548
LEP	R.AVMADHGPNGYQAIAAFHGNPPM(+15.99)C(+57.02)PMPDGK.N	non-specific cleavage, Oxidation (M); Carbamidomethylation	3166.39	4.1	792.607	4	33887	2519	2548
LEP	A.IAAFHGNPPMC(+57.02)PMPDGK.N	non-specific cleavage, Carbamidomethylation	1838.83	-1.2	613.949	3	29076	2532	2548
LEP	A.AFHGNPPMC(+57.02)PMPDGK.N	non-specific cleavage, Carbamidomethylation	1654.71	0.9	552.576	3	21635	2534	2548
LEP	A.AFHGNPPMC(+57.02)PM(+15.99)PDGK.N	non-specific cleavage, Carbamidomethylation; Oxidation (M)	1670.7	-3.9	557.905	3	16730	2534	2548
LEP	A.FHGNPPMC(+57.02)PMPDGK.N	non-specific cleavage, Carbamidomethylation	1583.67	0.2	528.897	3	20514	2535	2548
LEP	A.FHGNPPM(+15.99)C(+57.02)PMPDGK.N	non-specific cleavage, Oxidation (M); Carbamidomethylation	1599.66	3	534.23	3	15451	2535	2548
LEP	H.GNPPMC(+57.02)PMPDGK.N	non-specific cleavage, Carbamidomethylation	1299.54	2.9	650.78	2	20228	2537	2548
v8	K.QMEDALTAHGAR.V	G peptide	1298.6	-0.3	433.875	3	10684	2570	2581
LEP	K.QMEDALTAH.G	non-specific cleavage	1014.44	0.8	508.23	2	17224	2570	2578
LEP	K.QMEDALTAHGA.R	non-specific cleavage	1142.5	1	572.259	2	19350	2570	2580
trypsin	K.QM(+15.99)EDALTAHGAR.V	Oxidation (M)	1314.6	0.8	439.207	3	7960	2570	2581
trypsin	K.Q(-17.03)MEDALTAHGAR.V	Pyro-glu from Q	1281.58	1.7	641.797	2	22071	2570	2581
trypsin	K.Q(-17.03)M(+15.99)EDALTAHGAR.V	Pyro-glu from Q; Oxidation (M)	1297.57	0.6	649.794	2	18007	2570	2581
trypsin	K.QMEDALTAHGAR.V	T peptide	1298.6	0.5	433.875	3	9282	2570	2581
trypsin	Q.MEDALTAHGAR.V	non specific cleavage	1170.55	1.2	586.281	2	11779	2571	2581
trypsin	Q.M(+15.99)EDALTAHGAR.V	non specific cleavage, Oxidation (M)	1186.54	-1.2	594.277	2	6201	2571	2581
trypsin	M.EDALTAHGAR.V	non specific cleavage	1039.5	-0.4	520.759	2	11702	2572	2581
trypsin	E.DALTAHGAR.V	non specific cleavage	910.462	0.4	456.238	2	11657	2573	2581
trypsin	D.ALTAHGAR.V	non specific cleavage	795.435	-2.3	398.724	2	11644	2574	2581
trypsin	A.LTAHGAR.V	non specific cleavage	724.398	-2.9	363.205	2	11709	2575	2581
trypsin	L.TAHGAR.V	non specific cleavage	611.314	-0.6	306.664	2	11660	2576	2581
LEP	T.AFTALPTFVTDEEDNPFHHGHIDYLGVDTTRSPRDK.L	non-specific cleavage	4097.95	-3	820.595	5	44217	2592	2627
trypsin	A.FTALPTFVTDEEDNPFHHGHIDYLGVDTTR.S	non specific cleavage	3443.61	0.1	689.729	5	46907	2593	2622
trypsin	F.TALPTFVTDEEDNPFHHGHIDYLGVDTTR.S	non specific cleavage	3296.54	-1.5	825.14	4	43224	2594	2622
v8	F.TALPTFVTDEEDNPFHHGHIDYLGVDTTR.S	non-specific cleavage	3296.54	-1.4	825.14	4	41623	2594	2622
trypsin	T.ALPTFVTDEEDNPFHHGHIDYLGVDTTR.S	non specific cleavage	3195.49	2.8	640.107	5	42350	2595	2622
trypsin	T.FVTDEEDNPFHHGHIDYLGVDTTR.S	non specific cleavage	2813.27	-1.9	704.323	4	33531	2599	2622
trypsin	H.HGHIDYLGVDTTR.S	non specific cleavage	1482.72	-0.1	495.248	3	16519	2610	2622
LEP	H.HGHIDYLGVDTTRSPRDK.L	non-specific cleavage	2066.03	2.8	414.214	5	14421	2610	2627
trypsin	H.GHIDYLGVDTTR.S	non specific cleavage	1345.66	1.7	449.562	3	21385	2611	2622
LEP	H.GHIDYLGVDTTRSPRDK.L	non-specific cleavage	1928.97	0.6	643.998	3	17114	2611	2627
v8	H.GHIDYLGVDTTR.S	non-specific cleavage	1345.66	-0.5	449.561	3	20400	2611	2622
trypsin	H.IDYLGVDTTR.S	non specific cleavage	1151.58	-0.9	576.798	2	27372	2613	2622
v8	H.IDYLGVDTTR.S	non-specific cleavage	1151.58	0.2	576.798	2	26051	2613	2622
trypsin	Y.LGVDTTR.S	non specific cleavage	760.408	0.9	381.212	2	8252	2616	2622
trypsin	K.LFNDPER.G	T peptide	889.429	-4.3	445.72	2	13742	2628	2634
trypsin	L.FNDPER.G	non specific cleavage	776.345	0.6	389.18	2	13890	2629	2634
v8	R.GSESFFYR.Q	G peptide	991.44	-2.7	496.726	2	23049	2635	2642
trypsin	R.GSESFFYR.Q	T peptide	991.44	2.2	496.728	2	24458	2635	2642
trypsin	Y.GMSTLEYTTYDPLFWLH.H	non specific cleavage	2072.96	2	1037.49	2	51993	2678	2694
trypsin	Y.GMSTLEYTTYDPLFWLHH.A	non specific cleavage	2210.01	2.2	737.68	3	51194	2678	2695
trypsin	Y.GMSTLEYTTYDPLFWLHHANTDR.I	non specific cleavage	2767.27	1.3	923.432	3	50245	2678	2700
trypsin	Y.GM(+15.99)STLEYTTYDPLFWLHH.A	non specific cleavage, Oxidation (M)	2226.01	0.8	743.011	3	50970	2678	2695
trypsin	Y.GM(+15.99)STLEYTTYDPLFWLHHANTDR.I	non specific cleavage, Oxidation (M)	2783.26	2.1	696.825	4	49173	2678	2700
trypsin	M.STLEYTTYDPLFWLHH.A	non specific cleavage	2021.95	0.3	674.992	3	51004	2680	2695
trypsin	S.TLEYTTYDPLFWLHH.A	non specific cleavage	1934.92	4	645.983	3	51038	2681	2695
trypsin	S.TLEYTTYDPLFWLHHANTDR.I	non specific cleavage	2492.18	1.7	624.052	4	48852	2681	2700
v8	E.YTTYDPLFWLHHANTDR.I	G peptide	2149	1.1	538.258	4	55054	2684	2700
v8	T.TYDPLFWLHHANTDR.I	non-specific cleavage	1884.89	-1.8	629.303	3	42220	2686	2700
v8	L.FWLHHANTDR.I	non-specific cleavage	1295.62	1.4	648.816	2	42231	2691	2700
v8	F.WLHHANTDR.I	non-specific cleavage	1148.55	-0.9	575.28	2	42288	2692	2700
v8	R.IWAIWQALQEYR.G	G peptide	1575.82	1.8	788.919	2	49925	2701	2712
trypsin	R.GLPYDHANC(+57.02)EIQAMK.R	Carbamidomethylation	1745.79	-0.4	873.9	2	23023	2713	2727
v8	R.GLPYDHANC(+57.02)E.I	Carbamidomethylation	1174.47	0.2	588.243	2	12792	2713	2722
v8	R.GLPYDHANC(+57.02)EIQAMK.R	Carbamidomethylation	1745.79	0.2	582.936	3	21845	2713	2727
trypsin	R.GLPYDHANC(+57.02)EIQAM(+15.99)K.R	non-specific cleavage, Carbamidomethylation; Oxidation (M)	1761.78	-1.9	881.896	2	23040	2713	2727
trypsin	L.PYDHANC(+57.02)EIQAM(+15.99)K.R	non specific cleavage, Carbamidomethylation; Oxidation (M)	1591.68	0.4	796.846	2	16999	2715	2727
trypsin	P.YDHANC(+57.02)EIQAMK.R	non specific cleavage, Carbamidomethylation	1478.63	-2.2	740.32	2	23073	2716	2727
trypsin	H.ANC(+57.02)EIQAMK.R	non specific cleavage, Carbamidomethylation	1063.48	0.6	532.747	2	11124	2719	2727
LEP	H.ANC(+57.02)EIQAMK.R	non-specific cleavage, Carbamidomethylation	1063.48	-0.8	532.746	2	13325	2719	2727
LEP	A.NC(+57.02)EIQAMK.R	non-specific cleavage, Carbamidomethylation	992.442	3.6	497.23	2	12671	2720	2727
LEP	K.RPLRPFSDPIN(-17.03)HNAFTHSNAK.P	Ammonia-loss (N)	2401.2	3.4	481.25	5	19856	2728	2748
LEP	K.RPLRPFSDPINHNAFTHSNAK.P	L peptide	2418.23	1.4	605.566	4	19893	2728	2748
LEP	K.RPLRPFSDPINHNAFTHSNA.K	non-specific cleavage	2290.14	1.4	573.542	4	23563	2728	2747
v8	K.RPLRPFSDPINHNAFTH.S	non-specific cleavage	2018.02	0	505.513	4	21485	2728	2744
trypsin	K.RPLRPFSDPINHNAFTHSNAKPTDVFEYSR.F	T peptide	3512.73	-2.6	703.552	5	28788	2728	2757
v8	R.PLRPFSD.P	G peptide	830.429	-1.9	416.221	2	18720	2729	2735
v8	R.PLRPFSDPINHNAFTHSNAK.P	G peptide	2262.13	0.8	566.54	4	21163	2729	2748
trypsin	R.PLRPFSDPINHNAFTHSNAKPTDVFEYSR.F	T peptide	3356.63	-3.3	672.332	5	32749	2729	2757
LEP	F.SDPINHNAFTHSNAK.P	non-specific cleavage	1651.77	0.6	413.95	4	10370	2734	2748
v8	K.PTDVFEYSR.F	G peptide	1112.51	-0.4	557.264	2	21491	2749	2757
LEP	K.PTDVFEYSRFNFQYDNLRFHGMTIK.K	L peptide	3124.49	-1	625.904	5	46063	2749	2773
LEP	K.PTDVFEYSRFNFQYDNLRFH.G	non-specific cleavage	2594.2	-2.7	649.555	4	47332	2749	2768
trypsin	K.PTDVFEYSR.F	T peptide	1112.51	0.3	557.264	2	23002	2749	2757
LEP	Y.SRFNFQYDNLR.F	non-specific cleavage	1458.7	0.9	730.358	2	28066	2756	2766
LEP	Y.SRFNFQYDNLRFH.G	non-specific cleavage	1742.83	-1.8	581.949	3	33526	2756	2768
v8	R.FNFQYDNLR.F	G peptide	1215.57	1	608.792	2	32502	2758	2766
LEP	R.FNFQYDNLR.F	non-specific cleavage	1215.57	4.2	608.793	2	35095	2758	2766
trypsin	R.FNFQYDNLR.F	T peptide	1215.57	-0.2	406.196	3	33141	2758	2766
trypsin	F.NFQYDNLR.F	non-specific cleavage	1068.5	0.1	535.257	2	33157	2759	2766
trypsin	R.FHGMTIK.K	T peptide	832.427	-0.8	417.22	2	11944	2767	2773
trypsin	F.HGMTIK.K	non-specific cleavage	685.358	-0.9	343.686	2	12003	2768	2773
v8	K.EEDRTFAAFLLHGIK.K	G peptide	1745.91	4	582.98	3	43125	2784	2798
LEP	K.EEDRTFAAFLLHGIK.K	L peptide	1745.91	0.1	873.962	2	46337	2784	2798
LEP	K.EEDRTFAAFLLHGIKK.S	L peptide	1874.01	3.5	469.51	4	40438	2784	2799
LEP	K.E(-18.01)EDRTFAAFLLHGIK.K	Pyro-glu from E	1727.9	1.6	576.975	3	52968	2784	2798
trypsin	K.EEDRTFAAFLLHGIK.K	T peptide	1745.91	0.9	582.978	3	44734	2784	2798
LEP	E.EDRTFAAFLLHGIK.K	non-specific cleavage	1616.87	2.2	539.964	3	46358	2785	2798
v8	R.TFAAFLLHGIK.K	G peptide	1216.7	1	609.356	2	42505	2788	2798
LEP	R.TFAAFLLHGIK.K	non-specific cleavage	1216.7	2.3	609.357	2	45843	2788	2798
trypsin	R.TFAAFLLHGIK.K	T peptide	1216.7	0.9	609.356	2	44119	2788	2798
trypsin	T.FAAFLLHGIK.K	non-specific cleavage	1115.65	-1.2	558.831	2	44199	2789	2798
v8	F.AAFLLHGIK.K	non-specific cleavage	968.581	-0.3	485.298	2	42569	2790	2798
LEP	A.AFLLHGIK.K	non-specific cleavage	897.544	1.6	449.78	2	27083	2791	2798
trypsin	A.AFLLHGIK.K	non-specific cleavage	897.544	0.8	449.779	2	44226	2791	2798
LEP	A.FLLHGIK.K	non-specific cleavage	826.506	4.8	414.262	2	46386	2792	2798
LEP	F.LLHGIK.K	non-specific cleavage	679.438	1	340.727	2	24462	2793	2798
trypsin	K.SADVSFDVC(+57.02)NHDGEC(+57.02)HFAGTFAILGGEHEMPWSFDR.L	Carbamidomethylation	4096.72	1	820.352	5	50061	2800	2835
trypsin	H.FAGTFAILGGEHEMPWSFDR.L	non-specific cleavage	2267.05	-1.8	756.688	3	50601	2816	2835
LEP	R.LFRYDITQVLK.Q	non-specific cleavage	1394.79	0.9	465.938	3	42362	2836	2846
trypsin	R.LFRYDITQVLK.Q	T peptide	1394.79	0.4	465.938	3	40571	2836	2846
LEP	L.FRYDITQVLK.Q	non-specific cleavage	1281.71	1.3	641.862	2	42438	2837	2846
trypsin	R.YDITQVLK.Q	T peptide	978.539	1.7	490.277	2	35610	2839	2846
LEP	K.QMHLEYDSDFTFHMRIIDTSGK.Q	L peptide	2670.22	2.6	668.564	4	43125	2847	2868
LEP	K.QMHLEYDSDFTFH.M	non-specific cleavage	1668.69	1.3	557.237	3	37063	2847	2859
LEP	K.QM(+15.99)HLEYDSDFTFHMRIIDTSGK.Q	Oxidation (M)	2686.22	2.7	538.252	5	38607	2847	2868
trypsin	K.QM(+15.99)HLEYDSDFTFHMR.I	Oxidation (M)	1971.82	1.4	493.964	4	30257	2847	2861
LEP	K.Q(-17.03)MHLEYDSDFTFHMRIIDTSGK.Q	Pyro-glu from Q	2653.19	3.2	664.308	4	47627	2847	2868
trypsin	K.Q(-17.03)MHLEYDSDFTFHMR.I	Pyro-glu from Q	1938.8	0.8	647.275	3	42686	2847	2861
LEP	K.Q(-17.03)M(+15.99)HLEYDSDFTFHMRIIDTSGK.Q	Pyro-glu from Q; Oxidation (M)	2669.19	-5.6	668.301	4	43723	2847	2868
trypsin	K.QMHLEYDSDFTFHMR.I	T peptide	1955.83	-0.3	652.95	3	35070	2847	2861
LEP	M.HLEYDSDFTFHMR.I	non-specific cleavage	1696.73	3.6	566.586	3	32210	2849	2861
v8	E.YDSDFTFHMR.I	G peptide	1317.54	1.6	659.781	2	26339	2852	2861
v8	D.SDFTFHMR.I	G peptide	1039.45	2.4	520.736	2	26368	2854	2861
LEP	H.MRIIDTSGK.Q	non-specific cleavage	1019.54	-0.1	340.855	3	14220	2860	2868
LEP	K.QLPSDLIK.M	L peptide	912.528	1.4	457.272	2	30407	2869	2876
LEP	K.M(+15.99)PTVEHSPGGK.H	Oxidation (M)	1154.54	1.5	578.278	2	3105	2877	2887
LEP	M.PTVEHSPGGK.H	non-specific cleavage	1007.5	3.3	504.761	2	8304	2878	2887
LEP	P.TVEHSPGGK.H	non specific cleavage	910.451	-0.3	456.233	2	8410	2879	2887
LEP	K.HHEDHHEDILVRK.N	L peptide	1663.82	1.1	555.614	3	4049	2892	2904
trypsin	K.HHEDHHEDILVR.K	T peptide	1535.72	-2.5	384.937	4	5863	2892	2903
v8	E.DHHEDILVR.K	G peptide	1132.56	-0.9	567.288	2	10065	2895	2903
LEP	E.DHHEDILVRK.N	non-specific cleavage	1260.66	0.7	421.227	3	7885	2895	2904
LEP	K.NIHSLSHHEAEELRDALYK.L	L peptide	2261.12	0.9	754.714	3	23372	2905	2923
trypsin	K.NIHSLSHHEAEELR.D	T peptide	1670.81	-1.9	418.71	4	7069	2905	2918
LEP	I.HSLSHHEAEELRDALYK.L	non-specific cleavage	2033.99	-1.4	679.004	3	23446	2907	2923
trypsin	I.HSLSHHEAEELR.D	non-specific cleavage	1443.69	0.4	482.236	3	7159	2907	2918
LEP	H.SLSHHEAEELRDALYK.L	non-specific cleavage	1896.93	-0.4	949.473	2	21939	2908	2923
trypsin	L.SHHEAEELR.D	non-specific cleavage	1106.51	0.4	554.263	2	4427	2910	2918
LEP	K.LQNDESHGGYEHIAGFHGYPNLC(+57.02)PEK.G	Carbamidomethylation	2968.32	0	743.087	4	28814	2924	2949
trypsin	K.LQNDESHGGYEHIAGFHGYPNLC(+57.02)PEK.G	Carbamidomethylation	2968.32	1.1	743.088	4	26671	2924	2949
LEP	N.DESHGGYEHIAGFHGYPNLC(+57.02)PEK.G	non-specific cleavage, Carbamidomethylation	2613.13	0.3	654.291	4	29266	2927	2949
LEP	H.IAGFHGYPNLC(+57.02)PEK.G	non-specific cleavage, Carbamidomethylation	1601.77	1.5	534.93	3	29662	2936	2949
LEP	G.FHGYPNLC(+57.02)PEK.G	non-specific cleavage, Carbamidomethylation	1360.62	-1.9	454.548	3	21815	2939	2949
LEP	H.GYPNLC(+57.02)PEK.G	non-specific cleavage, Carbamidomethylation	1076.5	4.5	539.258	2	20333	2941	2949
LEP	K.HGSHLGIPYWDWTQTISSLPTFFADSGNNNPFFK.Y	L peptide	3880.83	0.9	971.215	4	55139	2982	3015
LEP	K.HGSHLGIPYWDWTQ.T	non-specific cleavage	1695.78	3.9	566.269	3	45663	2982	2995
trypsin	K.HGSHLGIPYWDWTQTISSLPTFFADSGNNNPFFK.Y	T peptide	3880.83	4.4	971.218	4	51855	2982	3015
LEP	Q.TISSLPTFFADSGNNNPFFK.Y	non-specific cleavage	2203.06	3.7	1102.54	2	54523	2996	3015
trypsin	Q.TISSLPTFFADSGNNNPFFK.Y	non-specific cleavage	2203.06	2.9	1102.54	2	51199	2996	3015
LEP	S.SLPTFFADSGNNNPFFK.Y	non-specific cleavage	1901.89	-0.2	634.972	3	54087	2999	3015
trypsin	S.SLPTFFADSGNNNPFFK.Y	non-specific cleavage	1901.89	3.3	951.958	2	50842	2999	3015
v8	S.SLPTFFADSGNNNPFFK.Y	non-specific cleavage	1901.89	1.7	951.956	2	49044	2999	3015
LEP	F.ADSGNNNPFFK.Y	non-specific cleavage	1209.54	1.4	605.779	2	26037	3005	3015
v8	F.ADSGNNNPFFK.Y	non-specific cleavage	1209.54	1.3	605.779	2	22500	3005	3015
trypsin	F.ADSGNNNPFFK.Y	non-specific cleavage	1209.54	2.8	605.78	2	23896	3005	3015
LEP	A.DSGNNNPFFK.Y	non-specific cleavage	1138.5	4.2	570.262	2	28418	3006	3015
LEP	K.YHIRSINQDTVRDVNEAIFQQTK.F	L peptide	2774.41	1.5	694.611	4	33063	3016	3038
LEP	H.IRSINQDTVRDVNEAIFQQTK.F	non-specific cleavage	2474.29	1.4	619.58	4	33616	3018	3038
trypsin	R.SINQDTVR.D	T peptide	931.472	0	466.743	2	5528	3020	3027
trypsin	R.SINQDTVRDVNEAIFQQTK.F	T peptide	2205.1	2	736.043	3	33876	3020	3038
LEP	S.INQDTVRDVNEAIFQQTK.F	non-specific cleavage	2118.07	-0.5	707.03	3	34119	3021	3038
LEP	I.NQDTVRDVNEAIFQQTK.F	non-specific cleavage	2004.99	-1	669.335	3	29066	3022	3038
v8	R.DVNEAIFQQTK.F	G peptide	1291.64	2.6	646.829	2	25044	3028	3038
LEP	R.DVNEAIFQQTK.F	non-specific cleavage	1291.64	2.1	646.829	2	28544	3028	3038
trypsin	R.DVNEAIFQQTK.F	T peptide	1291.64	-3	646.826	2	26102	3028	3038
trypsin	L.QALEEDNYC(+57.02)DFEVQYEILHNEVH.A	non-specific cleavage, Carbamidomethylation	2893.25	-0.7	965.423	3	45030	3051	3073
LEP	Q.ALEEDNYC(+57.02)DFEVQYEILHNEVHALIGGAEK.Y	non-specific cleavage, Carbamidomethylation	3504.61	1	877.162	4	54050	3052	3081
v8	E.VHALIGGAE.K	G peptide	865.466	-0.4	433.74	2	16578	3072	3080
LEP	K.YSMSTLEYSAFDPYFMIHHASLDK.I	L peptide	2852.28	3.8	951.772	3	52601	3082	3105
LEP	K.YSMSTLEYSAFDPYFMIH.H	non-specific cleavage	2200.95	0.3	1101.48	2	54891	3082	3099
LEP	K.YSMSTLEYSAFDPYFMIHH.A	non-specific cleavage	2338.01	0.7	780.344	3	54140	3082	3100
LEP	K.YSMSTLEYSAFDPYFMIHHA.S	non-specific cleavage	2409.04	-0.6	804.022	3	54074	3082	3101
LEP	K.YSM(+15.99)STLEYSAFDPYFMIHHA.S	non-specific cleavage, Oxidation (M)	2425.04	1.2	809.355	3	52313	3082	3101
LEP	K.YSM(+15.99)STLEYSAFDPYFM(+15.99)IHHASLDK.I	Oxidation (M)	2884.27	4.4	722.079	4	43414	3082	3105
LEP	K.YSM(+15.99)STLEYSAFDPYFMIHHASLDK.I	Oxidation (M)	2868.28	-1.3	957.098	3	49275	3082	3105
trypsin	K.YSM(+15.99)STLEYSAFDPYFMIHHASLDK.I	Oxidation (M)	2868.28	2.7	718.079	4	47909	3082	3105
trypsin	K.YSMSTLEYSAFDPYFMIHHASLDK.I	T peptide	2852.28	2.3	714.08	4	50229	3082	3105
LEP	Y.SMSTLEYSAFDPYFMIHHASLDK.I	non-specific cleavage	2689.22	-2.1	673.311	4	50647	3083	3105
trypsin	Y.SMSTLEYSAFDPYFMIHHA.S	non-specific cleavage	2245.98	0.8	749.668	3	50546	3083	3101
trypsin	Y.SM(+15.99)STLEYSAFDPYFMIHHASLDK.I	non-specific cleavage, Oxidation (M)	2705.21	0.7	677.311	4	46805	3083	3105
LEP	S.MSTLEYSAFDPYFMIHHASLDK.I	non-specific cleavage	2602.19	1	651.555	4	50188	3084	3105
trypsin	M.STLEYSAFDPYFMIHHASLDK.I	non specific cleavage	2471.15	-0.5	824.722	3	46778	3085	3105
LEP	M.STLEYSAFDPYFMIHH.A	non-specific cleavage	1956.87	7	653.302	3	51523	3085	3100
LEP	M.STLEYSAFDPYFMIHHA.S	non-specific cleavage	2027.91	-1.6	676.976	3	51307	3085	3101
LEP	M.STLEYSAFDPYFMIHHASLDK.I	non-specific cleavage	2471.15	1.3	1236.58	2	48370	3085	3105
LEP	S.TLEYSAFDPYFMIHH.A	non-specific cleavage	1869.84	-2.5	624.286	3	51577	3086	3100
LEP	S.TLEYSAFDPYFMIHHASLDK.I	non-specific cleavage	2384.11	1.2	597.037	4	48408	3086	3105
trypsin	S.TLEYSAFDPYFMIHHASLDK.I	non-specific cleavage	2384.11	-0.1	795.712	3	46825	3086	3105
LEP	S.TLEYSAFDPYFM(+15.99)IHHASLDK.I	non-specific cleavage, Oxidation (M)	2400.11	1.5	801.045	3	42047	3086	3105
LEP	L.EYSAFDPYFMIHHASLDK.I	non-specific cleavage	2169.98	2.8	543.505	4	44871	3088	3105
v8	E.YSAFDPYFMIHHASLDK.I	G peptide	2040.94	2.7	511.244	4	40562	3089	3105
LEP	Y.SAFDPYFMIHH.A	non-specific cleavage	1363.6	3	455.543	3	43177	3090	3100
LEP	Y.SAFDPYFMIHHA.S	non-specific cleavage	1434.64	2.4	718.328	2	43357	3090	3101
LEP	Y.SAFDPYFMIHHASLDK.I	non-specific cleavage	1877.88	1.1	470.477	4	41343	3090	3105
trypsin	Y.SAFDPYFMIHHASLDK.I	non-specific cleavage	1877.88	0.7	626.967	3	39631	3090	3105
LEP	S.AFDPYFMIHHA.S	non-specific cleavage	1347.61	2.5	450.211	3	42440	3091	3101
LEP	S.AFDPYFMIHHASLDK.I	non-specific cleavage	1790.85	1.3	448.719	4	40633	3091	3105
LEP	D.PYFMIHHASLDK.I	non-specific cleavage	1457.71	1.2	365.436	4	22916	3094	3105
trypsin	Y.FMIHHASLDK.I	non-specific cleavage	1197.6	1.7	400.207	3	12234	3096	3105
v8	Y.FMIHHASLDK.I	non-specific cleavage	1197.6	-6.6	599.802	2	40317	3096	3105
LEP	F.MIHHASLDK.I	non-specific cleavage	1050.53	2.4	526.273	2	41442	3097	3105
trypsin	F.MIHHASLDK.I	non-specific cleavage	1050.53	-0.4	526.271	2	12291	3097	3105
trypsin	M.IHHASLDK.I	non specific cleavage	919.487	1.2	460.752	2	12312	3098	3105
LEP	M.IHHASLDK.I	non-specific cleavage	919.487	-0.5	307.503	3	2302	3098	3105
LEP	K.PAHAGSC(+57.02)AGDIMHVPLHPFNYESVNNDDFTRENSLPNAVVDSHRFNYK.Y	Carbamidomethylation	5438.5	-0.1	777.936	7	41192	3120	3167
trypsin	K.PAHAGSC(+57.02)AGDIMHM(sub V)PLHPFNYESVNNDDFTR.E	Carbamidomethylation	3499.51	5	700.913	5	30190	3120	3150
trypsin	K.PAHAGSC(+57.02)AGDIMHVPLHPFNYESVNNDDFTR.E	Carbamidomethylation	3467.54	-0.8	867.892	4	37965	3120	3150
LEP	K.PAHAGSC(+57.02)AGDIMHVPLHPF.N	non-specific cleavage, Carbamidomethylation	2012.93	0.6	504.241	4	38085	3120	3138
LEP	K.PAHAGSC(+57.02)AGDIMHVPLHPFNYESVNNDDFTREN.S	non-specific cleavage, Carbamidomethylation	3710.63	0.7	928.665	4	39619	3120	3152
trypsin	H.AGSC(+57.02)AGDIMHVPLHPFNYESVNNDDFTR.E	non-specific cleavage, Carbamidomethylation	3162.39	-3	791.603	4	41561	3123	3150
LEP	H.AGSC(+57.02)AGDIMHVPLHPFNYESVNNDDFTREN.S	non-specific cleavage, Carbamidomethylation	3405.48	2.8	852.379	4	43171	3123	3152
trypsin	S.C(+57.02)AGDIMHVPLHPFNYESVNNDDFTR.E	non-specific cleavage, Carbamidomethylation	2947.3	0.3	737.833	4	41728	3126	3150
LEP	C.AGDIMHVPLHPFNYESVNNDDFTREN.S	non-specific cleavage	3030.36	-2.2	758.595	4	42557	3127	3152
trypsin	C.AGDIMHVPLHPFNYESVNNDDFTR.E	non-specific cleavage	2787.27	-1.1	930.097	3	40964	3127	3150
LEP	D.IMHVPLHPFNYESVNNDDFTREN.S	non-specific cleavage	2787.27	1.9	697.826	4	38546	3130	3152
LEP	M.HVPLHPFNYESVNNDDFTREN.S	non-specific cleavage	2543.15	0.7	848.723	3	30798	3132	3152
v8	F.NYESVNNDDFTR.E	non-specific cleavage	1472.62	1.9	737.317	2	15472	3139	3150
trypsin	F.NYESVNNDDFTREN.S	non-specific cleavage	1715.7	-2.4	858.856	2	16689	3139	3152
LEP	N.YESVNNDDFTREN.S	non-specific cleavage	1601.66	3.3	801.84	2	18003	3140	3152
LEP	Y.ESVNNDDFTREN.S	non-specific cleavage	1438.6	0.5	720.306	2	13971	3141	3152
trypsin	Y.ESVNNDDFTR.E	non-specific cleavage	1195.51	2.1	598.764	2	10837	3141	3150
v8	E.SVNNDDFTR.E	G peptide	1066.47	-0.4	534.241	2	8276	3142	3150
LEP	S.VNNDDFTREN.S	non-specific cleavage	1222.52	-0.1	612.268	2	10361	3143	3152
v8	R.ENSLPNAVVDSHR.F	G peptide	1436.7	3	479.909	3	16400	3151	3163
trypsin	R.E(-18.01)NSLPNAVVDSHR.F	Pyro-glu from E	1418.69	0	473.904	3	16850	3151	3163
trypsin	R.ENSLPNAVVDSHR.F	T peptide	1436.7	-0.4	719.357	2	16840	3151	3163
trypsin	E.NSLPNAVVDSHR.F	non-specific cleavage	1307.66	0	654.836	2	16833	3152	3163
trypsin	N.SLPNAVVDSHR.F	non specific cleavage	1193.62	-0.1	597.815	2	16794	3153	3163
LEP	N.SLPNAVVDSHRFNYK.Y	non-specific cleavage	1745.88	3.8	873.953	2	24289	3153	3167
trypsin	S.LPNAVVDSHR.F	non-specific cleavage	1106.58	-3.1	554.297	2	16801	3154	3163
trypsin	L.PNAVVDSHR.F	non-specific cleavage	993.499	3.4	497.759	2	14058	3155	3163
trypsin	P.NAVVDSHR.F	non specific cleavage	896.446	-0.3	449.23	2	16912	3156	3163
LEP	P.NAVVDSHRFNYK.Y	non-specific cleavage	1448.72	2.6	725.367	2	24353	3156	3167
LEP	K.YDNLNLHGHNIEELEEVLRSLRLK.S	L peptide	2903.53	0.6	581.713	5	53178	3168	3191
LEP	K.YDNLNLHGHNIEELEEVLR.S	non-specific cleavage	2306.13	2.1	577.541	4	43092	3168	3186
trypsin	K.YDNLNLHGHNIEELEEVLR.S	T peptide	2306.13	5	577.542	4	41184	3168	3186
trypsin	K.YDNLNLHGHNIEELEEVLRSLRLK.S	T peptide	2903.53	4.2	581.715	5	50171	3168	3191
trypsin	N.LHGHNIEELEEVLR.S	non specific cleavage	1686.87	-0.3	563.297	3	31909	3173	3186
LEP	H.GHNIEELEEVLRSLRLK.S	non-specific cleavage	2034.12	1.5	509.539	4	50794	3175	3191
v8	R.VFAGFVLSGIR.T	G peptide	1164.67	-1.2	583.339	2	46586	3194	3204
trypsin	R.VFAGFVLSGIR.T	T peptide	1164.67	0.5	583.34	2	48491	3194	3204
v8	K.SGTDSDDEYAGSFVILGGAK.E	G peptide	1987.9	1.8	994.96	2	41954	3215	3234
LEP	K.SGTDSDDEYAGSFVILGGAK.E	L peptide	1987.9	-0.3	994.957	2	45512	3215	3234
trypsin	K.SGTDSDDEYAGSFVILGGAK.E	T peptide	1987.9	2.7	994.96	2	42541	3215	3234
v8	E.YAGSFVILGGAK.E	G peptide	1181.64	-0.5	591.829	2	36406	3223	3234
LEP	Y.AGSFVILGGAK.E	non-specific cleavage	1018.58	2	510.299	2	34969	3224	3234
LEP	G.SFVILGGAK.E	non-specific cleavage	890.523	1.7	446.269	2	34256	3226	3234
LEP	S.FVILGGAK.E	non-specific cleavage	803.49	-0.3	402.752	2	31022	3227	3234
LEP	R.LYRFDITETVHNLNLTDDHVK.F	non-specific cleavage	2542.28	2.3	509.465	5	41827	3243	3263
v8	R.FDITETVHNLNLTD.D	G peptide	1630.78	2.4	816.401	2	39605	3246	3259
LEP	K.FRFDLK.K	L peptide	824.454	-0.7	413.234	2	26929	3264	3269
LEP	F.RFDLK.K	non-specific cleavage	677.386	0.1	339.7	2	26956	3265	3269
LEP	K.KYDHTELDASVLPAPIIVRRPNNAVFDIIEIPIGK.D	L peptide	3913.15	-1.9	979.292	4	53834	3270	3304
LEP	K.KYDHTELDASVLPAPIIVR.R	non-specific cleavage	2136.16	3.4	535.048	4	43491	3270	3288
LEP	K.KYDHTELDASVLPAPIIVRRPN.N	non-specific cleavage	2503.35	2.3	626.847	4	38631	3270	3291
LEP	K.KYDHTELDASVLPAPIIVRRPNN.A	non-specific cleavage	2617.4	1.5	655.358	4	37929	3270	3292
LEP	K.YDHTELDASVLPAPIIVRRPNNAVFDIIEIPIGK.D	L peptide	3785.05	-2.2	947.268	4	54171	3271	3304
LEP	K.YDHTELDASVLPAPIIVR.R	non-specific cleavage	2008.06	8.1	1005.05	2	48334	3271	3288
LEP	K.YDHTELDASVLPAPIIVRRPN.N	non-specific cleavage	2375.26	0.7	594.823	4	42755	3271	3291
trypsin	K.YDHTELDASVLPAPIIVR.R	T peptide	2008.06	0.1	1005.04	2	46569	3271	3288
trypsin	K.YDHTELDASVLPAPIIVRRPNNAVFDIIEIPIGK.D	T peptide	3785.05	1.6	758.019	5	50861	3271	3304
LEP	S.VLPAPIIVRRPNNAVFDIIEIPIGK.D	non-specific cleavage	2753.63	0.2	689.415	4	54027	3280	3304
LEP	L.PAPIIVRRPNNAVFDIIEIPIGK.D	non-specific cleavage	2541.48	-7.1	848.161	3	54199	3282	3304
LEP	I.IVRRPNNAVFDIIEIPIGK.D	non-specific cleavage	2163.25	2.2	541.822	4	48066	3286	3304
LEP	V.RRPNNAVFDIIEIPIGK.D	non-specific cleavage	1951.1	1.9	651.375	3	47037	3288	3304
v8	R.RPNNAVFD.I	G peptide	931.451	0	466.733	2	11121	3289	3296
LEP	R.RPNNAVFDIIEIPIGK.D	non-specific cleavage	1795	2.1	599.342	3	52537	3289	3304
trypsin	R.RPNNAVFDIIEIPIGK.D	T peptide	1795	2.3	599.342	3	50357	3289	3304
trypsin	P.NNAVFDIIEIPIGK.D	non specific cleavage	1541.85	3.8	771.933	2	51360	3291	3304
trypsin	N.NAVFDIIEIPIGK.D	non specific cleavage	1427.8	1.7	714.91	2	51402	3292	3304
LEP	N.NAVFDIIEIPIGK.D	non-specific cleavage	1427.8	0	714.908	2	54739	3292	3304
trypsin	N.AVFDIIEIPIGK.D	non specific cleavage	1313.76	3	657.889	2	51338	3293	3304
LEP	N.AVFDIIEIPIGK.D	non-specific cleavage	1313.76	-0.4	657.887	2	54655	3293	3304
LEP	A.VFDIIEIPIGK.D	non-specific cleavage	1242.72	2	622.37	2	54344	3294	3304
LEP	V.FDIIEIPIGK.D	non-specific cleavage	1143.65	3.1	572.836	2	52894	3295	3304
LEP	F.DIIEIPIGK.D	non-specific cleavage	996.586	1.4	499.301	2	45481	3296	3304
LEP	D.IIEIPIGK.D	non-specific cleavage	881.559	1.1	441.787	2	37804	3297	3304
v8	K.DVNLPPK.V	G peptide	781.433	2.2	391.725	2	14558	3305	3311
LEP	K.DVNLPPK.V	L peptide	781.433	0	391.724	2	17434	3305	3311
trypsin	K.DVNLPPK.V	T peptide	781.433	1.5	391.724	2	15549	3305	3311
LEP	K.IMFMSVDEAVTTPMLNLGSYTAMFK.C	L peptide	2796.32	3.1	1399.17	2	55534	3320	3344
LEP	K.IM(+15.99)FMSVDEAVTTPM(+15.99)LNLGSYTAM(+15.99)FK.C	Oxidation (M)	2844.31	-0.2	949.11	3	54326	3320	3344
LEP	K.IMFMSVDEAVTTPM(+15.99)LNLGSYTAM(+15.99)FK.C	Oxidation (M)	2828.31	0.8	943.779	3	54617	3320	3344
LEP	K.IMFMSVDEAVTTPM(+15.99)LNLGSYTAMFK.C	Oxidation (M)	2812.32	1.7	938.449	3	55032	3320	3344
trypsin	F.MSVDEAVTTPMLNLGSYTAMFK.C	non-specific cleavage	2405.13	2.3	1203.58	2	51510	3323	3344
trypsin	M.SVDEAVTTPMLNLGSYTAMFK.C	non specific cleavage	2274.09	0	1138.05	2	51291	3324	3344
LEP	M.SVDEAVTTPMLNLGSYTAMFK.C	non-specific cleavage	2274.09	-0.2	759.038	3	54601	3324	3344
LEP	M.SVDEAVTTPM(+15.99)LNLGSYTAMFK.C	non-specific cleavage, Oxidation (M)	2290.09	0	1146.05	2	53981	3324	3344
v8	E.AVTTPMLNLGSYTAMFK.C	G peptide	1843.92	-0.2	922.968	2	49386	3328	3344
LEP	M.LNLGSYTAMFK.C	non-specific cleavage	1243.63	0.9	622.821	2	45772	3334	3344
trypsin	N.LGSYTAMFK.C	non specific cleavage	1016.5	0.6	509.258	2	29162	3336	3344
v8	K.VPPFSFHAFE.L	G peptide	1176.56	4	589.29	2	44537	3347	3356
LEP	K.VPPFSFHAFELGK.M	L peptide	1474.76	1.9	492.595	3	46249	3347	3359
v8	K.VPPFSFH.A	non-specific cleavage	829.412	2.1	415.714	2	33225	3347	3353
trypsin	K.VPPFSFHAFELGK.M	T peptide	1474.76	0.4	492.594	3	44692	3347	3359
LEP	V.PPFSFHAFELGK.M	non-specific cleavage	1375.69	1	688.854	2	46346	3348	3359
trypsin	P.PFSFHAFELGK.M	non specific cleavage	1278.64	-0.8	640.327	2	44790	3349	3359
LEP	P.PFSFHAFELGK.M	non-specific cleavage	1278.64	-1	427.22	3	46375	3349	3359
LEP	P.FSFHAFELGK.M	non-specific cleavage	1181.59	-2.3	591.799	2	46419	3350	3359
LEP	F.SFHAFELGK.M	non-specific cleavage	1034.52	2.6	345.848	3	26009	3351	3359
LEP	S.FHAFELGK.M	non-specific cleavage	947.486	1.4	474.751	2	26075	3352	3359
LEP	H.AFELGK.M	non-specific cleavage	663.359	1.9	332.688	2	18857	3354	3359
LEP	K.MYSVESGDYFMTASTTELC(+57.02)NDNNLRIHVHVDDE	non-specific cleavage, Carbamidomethylation	3861.66	1.2	966.422	4	45371	3360	3392
LEP	K.M(+15.99)YSVESGDYFMTASTTELC(+57.02)NDNNLRIHVHVDDE	non-specific cleavage, Oxidation (M); Carbamidomethylation	3877.65	1.5	970.421	4	44404	3360	3392
trypsin	M.TASTTELC(+57.02)NDNNLR.I	non specific cleavage, Carbamidomethylation	1607.72	1.7	804.869	2	14445	3371	3384
LEP	M.TASTTELC(+57.02)NDNNLR.I	non-specific cleavage, Carbamidomethylation	1607.72	1.5	804.869	2	17054	3371	3384
LEP	M.TASTTELC(+57.02)NDNNLRIHVHVDDE	non-specific cleavage, Carbamidomethylation	2552.16	-1.4	639.045	4	26942	3371	3392
LEP	A.STTELC(+57.02)NDNNLR.I	non-specific cleavage, Carbamidomethylation	1435.64	-1.8	718.824	2	15161	3373	3384
trypsin	A.STTELC(+57.02)NDNNLR.I	non-specific cleavage, Carbamidomethylation	1435.64	0.2	718.825	2	12572	3373	3384
v8	E.LC(+57.02)NDNNLR.I	Carbamidomethylation	1017.47	-0.6	509.74	2	4984	3377	3384

## Sheet: Table SII
Table SII. Sequence verification of KLH2 using the Peaks software.
Digestion	Peptide	PTM	Mass	ppm	m/z	z	Scan	Start	End
LEP	V(+43.01)DTVVRK.N	Carbamylation	858.492	0.7	430.254	2	17704	1	7
LEP	VDTVVRK.N	LEP Peptide	815.486	-0.8	408.75	2	3280	1	7
LEP	VDTVVRKNVDSLSSDEVLALEK.A	LEP Peptide	2415.29	2.8	806.105	3	34240	1	22
LEP	K.NVD(-18.01)SLSSDEVLALEK.A	Dehydration	1599.8	1.2	800.908	2	43395	8	22
LEP	K.NVDSLSSDEVLALEK.A	LEP Peptide	1617.81	1	809.913	2	37568	8	22
trypsin	K.NVDSLSSDEVLALEK.A		1617.81	2.4	809.914	2	37569	8	22
Glu-C	K.NVDSLSSDEVLALEK.A		1617.81		809.913	2	36142	8	22
LEP	N.VDSLSSDEVLALEK.A	non-specific cleavage	1503.77	0.3	752.891	2	38462	9	22
LEP	D.SLSSDEVLALEK.A	non-specific cleavage	1289.67	3.5	645.845	2	34453	11	22
LEP	L.SSDEVLALEK.A	non-specific cleavage	1089.56	2.9	545.787	2	25780	13	22
LEP	S.SDEVLALEK.A	non-specific cleavage	1002.52	2.2	502.27	2	25590	14	22
LEP	S.DEVLALEK.A	non-specific cleavage	915.491	3	458.754	2	26504	15	22
LEP	D.EVLALEK.A	non-specific cleavage	800.464	-0.7	401.239	2	22210	16	22
Glu-C	E.VLALEK.A		671.422		336.718	2	14176	17	22
trypsin	K.ALDDLQQDDSNQGYQAIAGYHGVPTMC(+57.02)VDK.H	Carbamidomethylation	3308.47	-0.9	1103.83	3	38836	23	52
LEP	K.ALDDLQQDDSNQGYQAIAGYHGVPTMC(+57.02)VDK.H	LEP Peptide, Carbamidomethylation	3308.47	-0.3	1103.83	3	41026	23	52
LEP	K.ALDDLQQDDSNQGYQA.I	non-specific cleavage	1779.75	2	890.886	2	26738	23	38
Glu-C	K.ALDDLQQDDSNQGYQAIAGYH.G	non-specific cleavage	2321.02		1161.51	2	31632	23	43
trypsin	K.ALDDLQQDDSNQGYQAIAGYH.G	non-specific cleavage	2321.02	2.1	1161.52	2	33253	23	43
LEP	K.ALDDLQQDDSNQGYQAIAGYH.G	non-specific cleavage	2321.02	2.4	1161.52	2	35361	23	43
LEP	K.ALDDLQQDDSNQGYQAIAGYHGVPTM(+15.99)C(+57.02)VDK.H	Oxidation (M); Carbamidomethylation	3324.47	0.6	1109.16	3	36012	23	52
LEP	A.IAGYHGVPTMC(+57.02)VDK.H	Carbamidomethylation, non-specific cleavage	1546.73	-1.1	774.37	2	24966	39	52
LEP	A.GYHGVPTMC(+57.02)VDK.H	Carbamidomethylation, non-specific cleavage	1362.61	1.4	455.21	3	19764	41	52
LEP	G.YHGVPTMC(+57.02)VDK.H	Carbamidomethylation, non-specific cleavage	1305.58	1.5	436.203	3	18821	42	52
LEP	Y.HGVPTMC(+57.02)VDK.H	Carbamidomethylation, non-specific cleavage	1142.52	0.2	572.268	2	14262	43	52
trypsin	H.GMPSFPLWHR.L	non-specific cleavage	1226.6	5	614.311	2	40155	63	72
trypsin	H.GM(+15.99)PSFPLWHR.L	Oxidation (M), non-specific cleavage	1242.6	-0.1	415.206	3	32597	63	72
trypsin	H.GM(+15.99)PSFPLWHR.L	Oxidation (M), non-specific cleavage	1242.6	-0.1	415.206	3	32597	63	72
trypsin	M.PSFPLWHR.L	non-specific cleavage	1038.54	2	520.278	2	40133	65	72
trypsin	S.FPLWHR.L	non-specific cleavage	854.455	1	428.235	2	25382	67	72
LEP	H.RLYVVQLER.A	non-specific cleavage	1174.68	0.5	392.568	3	26230	72	80
trypsin	R.LY(-18.01)VVQLER.A	Dehydration, non-specific cleavage	1000.57	-0.6	501.292	2	30673	73	80
LEP	R.LYVVQLER.A	non-specific cleavage	1018.58	2.5	510.299	2	32704	73	80
trypsin	R.LYVVQLER.A		1018.58	3.1	510.299	2	30980	73	80
Glu-C	R.LYVVQLER.A		1018.58		510.298	2	29821	73	80
trypsin	L.YVVQLER.A	non-specific cleavage	905.497	-1.1	453.755	2	30621	74	80
trypsin	Y.VVQLER.A	non-specific cleavage	742.434	-0.8	372.224	2	30666	75	80
LEP	R.ALIRK.K	non-specific cleavage	599.412	-1.8	300.713	2	2351	81	85
Glu-C	K.ATISIPYWDWTSE.L		1567.72		784.866	2	50113	87	99
Glu-C	E.LTHLPE.L		708.381		355.197	2	12746	100	105
LEP	K.AHDNSWYRADITFLNK.K	LEP Peptide	1949.94	-1.3	975.975	2	36067	120	135
LEP	K.AHDNSWYRADITFLNKK.T	LEP Peptide	2078.03	-1.7	520.515	4	31138	120	136
LEP	K.AHDNSWYRADIT.F	non-specific cleavage	1447.65	1.1	724.832	2	22978	120	131
Glu-C	K.AHDNSWYR.A		1047.45		524.734	2	6693	120	127
LEP	H.DNSWYRADITFLNK.K	non-specific cleavage	1741.84	0.5	581.622	3	44105	122	135
LEP	N.SWYRADITFLNK.K	non-specific cleavage	1512.77	-2.2	505.264	3	39034	124	135
LEP	W.YRADITFLNK.K	non-specific cleavage	1239.66	3	414.229	3	28917	126	135
LEP	R.ADITFLNK.K	non-specific cleavage	920.497	0.7	461.256	2	30178	128	135
trypsin	R.ADITFLNK.K		920.497	-0.4	461.255	2	27870	128	135
Glu-C	R.ADITFLNK.K		920.497		461.255	2	26696	128	135
LEP	A.DITFLNK.K	non-specific cleavage	849.46	0.7	425.737	2	31857	129	135
LEP	D.ITFLNK.K	non-specific cleavage	734.433	-0.1	368.224	2	24523	130	135
trypsin	D.ITFLNK.K	non-specific cleavage	734.433	1	368.224	2	27988	130	135
LEP	K.TSRAVDDRLFEK.V	LEP Peptide	1435.74	1	359.943	4	15851	137	148
LEP	T.SRAVDDRLFEK.V	non-specific cleavage	1334.69	2	445.906	3	16117	138	148
LEP	K.VQPGHHTRLMEGILDALEQDEFC(+57.02)K.F	Carbamidomethylation, non-specific cleavage	2822.35	-1.9	941.788	3	47367	149	172
LEP	K.VQPGHHTRLM(+15.99)EGILDALEQDEFC(+57.02)K.F	Oxidation (M); Carbamidomethylation	2838.34	4.2	947.125	3	39176	149	172
LEP	H.HTRLMEGILDALEQDEFC(+57.02)K.F	Carbamidomethylation, non-specific cleavage	2304.09	0.5	769.037	3	52004	154	172
LEP	H.TRLMEGILDALEQDEFC(+57.02)K.F	Carbamidomethylation, non-specific cleavage	2167.03	0.9	723.351	3	54139	155	172
LEP	H.TRLM(+15.99)EGILDALEQDEFC(+57.02)K.F	Oxidation (M); Carbamidomethylation, non-specific cleavage	2183.02	0.5	728.682	3	47788	155	172
LEP	H.TRLM(+15.99)EGILDALEQDEFC(+57.02)K.F	Oxidation (M); Carbamidomethylation, non-specific cleavage	2183.02	0.5	728.682	3	47788	155	172
trypsin	R.LMEGILDALEQDEFC(+57.02)K.F	Carbamidomethylation	1909.88	2.7	955.95	2	51051	157	172
Glu-C	R.LMEGILDALEQDEFC(+57.02)K.F	Carbamidomethylation	1909.88		955.947	2	49384	157	172
LEP	R.LMEGILDALEQDEFC(+57.02)K.F	Carbamidomethylation, non-specific cleavage	1909.88	1.2	955.948	2	54355	157	172
trypsin	R.LM(+15.99)EGILDALEQDEFC(+57.02)K.F	Oxidation (M); Carbamidomethylation	1925.88	0.6	963.945	2	50099	157	172
LEP	R.LM(+15.99)EGILDALEQDEFC(+57.02)K.F	Oxidation (M); Carbamidomethylation, non-specific cleavage	1925.88	0.5	963.945	2	51720	157	172
LEP	R.LM(+15.99)EGILDALEQDEFC(+57.02)K.F	Oxidation (M); Carbamidomethylation, non-specific cleavage	1925.88	0.5	963.945	2	51720	157	172
Glu-C	R.LMEGILDALE.Q		1102.56		552.287	2	50084	157	166
Glu-C	E.GILDALEQDEFC(+57.02)K.F	Carbamidomethylation	1536.71		769.368	2	45770	160	172
LEP	G.ILDALEQDEFC(+57.02)K.F	Carbamidomethylation, non-specific cleavage	1479.69	1.6	740.854	2	36664	161	172
trypsin	K.FEIQFELAHNAIHYLVGGR.H		2213.14	2.4	1107.58	2	50442	173	191
Glu-C	E.LAHNAIHYLVGGR.H		1419.77		355.951	4	19086	179	191
trypsin	L.AHNAIHYLVGGR.H	non-specific cleavage	1306.69	-2.4	436.569	3	14283	180	191
Glu-C	L.AHNAIHYLVGGR.H	non-specific cleavage	1306.69		436.57	3	18832	180	191
trypsin	A.HNAIHYLVGGR.H	non-specific cleavage	1235.65	0.1	412.891	3	13923	181	191
Glu-C	A.HNAIHYLVGGR.H	non-specific cleavage	1235.65		412.891	3	18469	181	191
Glu-C	H.NAIHYLVGGR.H	non-specific cleavage	1098.59		550.305	2	18800	182	191
trypsin	H.NAIHYLVGGR.H	non-specific cleavage	1098.59	1.8	550.305	2	19043	182	191
Glu-C	N.AIHYLVGGR.H	non-specific cleavage	984.551		493.283	2	18244	183	191
trypsin	N.AIHYLVGGR.H	non-specific cleavage	984.551	0.4	493.283	2	19093	183	191
Glu-C	A.IHYLVGGR.H	non-specific cleavage	913.513		457.764	2	14799	184	191
trypsin	A.IHYLVGGR.H	non-specific cleavage	913.513	2	457.765	2	15424	184	191
Glu-C	I.HYLVGGR.H	non-specific cleavage	800.429		401.221	2	14819	185	191
trypsin	R.HTYSMSHLEYTSYDPLFFLH.H	non-specific cleavage	2487.12	2.3	830.049	3	50115	192	211
trypsin	R.HTYSM(+15.99)SHLEYTSYDPLFFLHHSNTDR.I	Oxidation (M)	3213.43	1.5	804.365	4	38936	192	217
Glu-C	R.HTYSM(+15.99)SHLE.Y	Oxidation (M)	1119.47		560.741	2	4598	192	200
trypsin	R.HTYSMSHLEYTSYDPLFFLHHSNTDR.I		3197.43	2.5	800.367	4	41840	192	217
Glu-C	R.HTYSMSHLE.Y		1103.47		552.741	2	10002	192	200
trypsin	Y.SMSHLEYTSYDPLFFLHHSNTDR.I	non-specific cleavage	2796.26	0.6	560.26	5	43199	195	217
trypsin	S.MSHLEYTSYDPLFFLHHSNTDR.I	non-specific cleavage	2709.23	-0.4	678.314	4	42744	196	217
trypsin	M.SHLEYTSYDPLFFLHHSNTDR.I	non-specific cleavage	2578.19	1.4	516.646	5	41447	197	217
LEP	M.SHLEYTSYDPLFFLHH.S	non-specific cleavage	2004.94	3	502.243	4	48995	197	212
trypsin	S.HLEYTSYDPLFFLHH.S	non-specific cleavage	1917.9	1.8	640.31	3	48324	198	212
Glu-C	H.LEYTSYDPLFFLHH.S	non-specific cleavage	1780.85		594.621	3	49083	199	212
Glu-C	E.YTSYDPLFFLHHSN.T	non-specific cleavage	1739.79		580.94	3	45139	201	214
Glu-C	E.YTSYDPLFFLH.H	non-specific cleavage	1401.66		701.839	2	49775	201	211
Glu-C	E.YTSYDPLFFLHHSNTD.R		1955.87		652.965	3	45253	201	216
Glu-C	E.YTSYDPLFFLHHSNTDR.I		2111.97		529	4	40671	201	217
Glu-C	Y.TSYDPLFFLHHSNTDR.I	non-specific cleavage	1948.91		650.643	3	40173	202	217
trypsin	Y.TSYDPLFFLHHSNTDR.I	non-specific cleavage	1948.91	-3.7	488.232	4	40410	202	217
Glu-C	Y.TSYDPLFFLHH.S	non-specific cleavage	1375.66		688.836	2	46072	202	212
trypsin	T.SYDPLFFLHHSNTDR.I	non-specific cleavage	1847.86	3	616.962	3	39952	203	217
Glu-C	T.SYDPLFFLHHSNTDR.I	non-specific cleavage	1847.86		924.937	2	40313	203	217
trypsin	S.YDPLFFLHHSNTDR.I	non-specific cleavage	1760.83	1.4	587.95	3	40551	204	217
trypsin	Y.DPLFFLHHSNTDR.I	non-specific cleavage	1597.76	0.1	533.595	3	33771	205	217
Glu-C	Y.DPLFFLHHSNTDR.I	non-specific cleavage	1597.76		799.89	2	40231	205	217
trypsin	D.PLFFLHHSNTDR.I	non-specific cleavage	1482.74	2.2	742.377	2	41535	206	217
Glu-C	D.PLFFLHHSNTDR.I		1482.74		742.376	2	37054	206	217
trypsin	P.LFFLHHSNTDR.I	non-specific cleavage	1385.68	1.5	693.85	2	41599	207	217
trypsin	L.FFLHHSNTDR.I	non-specific cleavage	1272.6	-1.2	637.307	2	38655	208	217
Glu-C	L.FFLHHSNTDR.I	non-specific cleavage	1272.6		637.306	2	40169	208	217
Glu-C	F.FLHHSNTDR.I	non-specific cleavage	1125.53		563.773	2	37001	209	217
trypsin	F.FLHHSNTDR.I	non-specific cleavage	1125.53	0.7	563.773	2	38665	209	217
trypsin	K.DPNSADC(+57.02)AHNLIHTPMEPFDR.D	Carbamidomethylation	2436.06	1.6	813.028	3	33210	232	252
trypsin	K.DPNSADC(+57.02)AHNLIHTPMEPFDRDTNPLDLTR.E	Carbamidomethylation	3461.57	-1.3	1154.86	3	42155	232	261
Glu-C	K.DPNSADC(+57.02)AHNLIHTPMEPFDR.D	Carbamidomethylation	2436.06		813.026	3	31805	232	252
LEP	K.DPNSADC(+57.02)AHNLIHTPMEPFDRDTNPLDLTREH.A	Carbamidomethylation, non-specific cleavage	3727.67	-3.9	932.922	4	42355	232	263
LEP	K.DPNSADC(+57.02)AHNLIHTPMEPFDRDTNPLDLTR.E	Carbamidomethylation, non-specific cleavage	3461.57	5.8	866.405	4	44003	232	261
LEP	K.DPNSADC(+57.02)AHNLIHTPM(+15.99)EPFDRDTNPLDLTREH.A	Carbamidomethylation; Oxidation (M), non-specific cleavage	3743.67	-3	749.739	5	40257	232	263
LEP	D.PNSADC(+57.02)AHNLIHTPMEPFDRDTNPLDLTREH.A	Carbamidomethylation, non-specific cleavage	3612.65	-4.1	723.534	5	39758	233	263
LEP	C.AHNLIHTPMEPFDRDTNPLDLTREH.A	non-specific cleavage	2968.43	2.6	743.115	4	36949	239	263
trypsin	H.NLIHTPMEPFDR.D	non-specific cleavage	1468.71	0.5	490.579	3	31362	241	252
Glu-C	H.NLIHTPMEPFDRDTNPLDLTR.E	non-specific cleavage	2494.23		624.564	4	40475	241	261
LEP	H.NLIHTPMEPFDRDTNPLDLTREH.A	non-specific cleavage	2760.33	0	691.09	4	41363	241	263
trypsin	H.NLIHTPMEPFDRDTNPLDLTR.E	non-specific cleavage	2494.23	-2.7	624.562	4	42188	241	261
LEP	H.NLIHTPMEPFDRDTNPLDLTR.E	non-specific cleavage	2494.23	0.8	624.565	4	43955	241	261
Glu-C	H.NLIHTPM(+15.99)EPFDR.D	Oxidation (M), non-specific cleavage	1484.71		495.91	3	23483	241	252
Glu-C	H.NLIHTPM(+15.99)EPFDR.D	Oxidation (M), non-specific cleavage	1484.71		495.91	3	23483	241	252
LEP	N.LIHTPMEPFDRDTNPLDLTREH.A	non-specific cleavage	2646.29	-0.8	530.264	5	39748	242	263
LEP	L.IHTPMEPFDRDTNPLDLTREH.A	non-specific cleavage	2533.2	1.2	634.308	4	37160	243	263
LEP	H.TPMEPFDRDTNPLDLTREH.A	non-specific cleavage	2283.06	0.4	571.772	4	38176	245	263
LEP	H.TPM(+15.99)EPFDRDTNPLDLTREH.A	Oxidation (M), non-specific cleavage	2299.05	0.7	575.771	4	34181	245	263
LEP	H.TPM(+15.99)EPFDRDTNPLDLTREH.A	Oxidation (M), non-specific cleavage	2299.05	0.7	575.771	4	34181	245	263
Glu-C	R.DTNPLDLTR.E	non-specific cleavage	1043.52		522.77	2	27622	253	261
trypsin	R.DTNPLDLTR.E		1043.52	0.6	522.77	2	28836	253	261
trypsin	D.TNPLDLTR.E	non-specific cleavage	928.498	2.7	465.257	2	23806	254	261
Glu-C	D.TNPLDLTR.E		928.498		465.257	2	22775	254	261
trypsin	T.NPLDLTR.E	non-specific cleavage	827.45	0.5	414.733	2	28738	255	261
trypsin	N.PLDLTR.E	non-specific cleavage	713.407	0.3	357.711	2	28772	256	261
LEP	K.PADSFDYGRLGYQYDDLSLNGMSPEELNVYLGERAAK.E	LEP Peptide	4152.94	-2.9	831.592	5	53212	266	302
Glu-C	K.PADSFDYGR.L	non-specific cleavage	1026.44		514.228	2	13962	266	274
LEP	K.PADSFDYGR.L	non-specific cleavage	1026.44	1.2	514.228	2	17356	266	274
LEP	K.PADSFDYGRLGYQYDDLSLN.G	non-specific cleavage	2308.03	0.4	1155.02	2	46973	266	285
LEP	K.PADSFDYGRLGYQYDDLSLNGMSPEELNVYLGER.A	non-specific cleavage	3882.77	1.7	1295.27	3	54007	266	299
LEP	K.PADSFDYGRLGYQYDDLSLNGM(+15.99)SPEELNVYLGERAAK.E	Oxidation (M), non-specific cleavage	4168.93	1.9	1043.24	4	49068	266	302
LEP	K.PADSFDYGRLGYQYDDLSLNGM(+15.99)SPEELNVYLGERAAK.E	Oxidation (M), non-specific cleavage	4168.93	1.9	1043.24	4	49068	266	302
trypsin	K.PADSFDYGR.L		1026.44	0.3	514.228	2	15071	266	274
trypsin	R.LGYQYDDLSLNGM(+15.99)SPEELNVYLGER.A	Oxidation (M)	2890.33	5.5	1446.18	2	50220	275	299
trypsin	R.LGYQYDDLSLNGMSPEELNVYLGER.A		2874.34	0.9	1438.18	2	50906	275	299
LEP	N.GMSPEELNVYLGERAAK.E	non-specific cleavage	1862.92	0.4	621.981	3	36695	286	302
Glu-C	E.ELNVYLGER.A		1091.56		546.786	2	26497	291	299
Glu-C	E.LNVYLGER.A	non-specific cleavage	962.519		482.266	2	23364	292	299
LEP	K.ERTFASFILSGFGGSAN.V	non-specific cleavage	1759.85	0.8	880.934	2	54639	303	319
Glu-C	N.VVVYVC(+57.02)RPAHDE.I	Carbamidomethylation, non-specific cleavage	1442.7		481.906	3	14754	320	331
LEP	K.AGDFFLLGGPTEMK.W	LEP Peptide	1481.72	2.1	741.87	2	50983	340	353
Glu-C	K.AGDFFLLGGPTEM(+15.99)K.W	Oxidation (M)	1497.72		749.866	2	43205	340	353
LEP	K.AGDFFLLGGPTEM(+15.99)K.W	Oxidation (M)	1497.72	-0.8	749.865	2	49640	340	353
LEP	K.AGDFFLLGGPTEM(+15.99).K	Oxidation (M), non-specific cleavage	1369.62	-0.6	685.818	2	54783	340	352
LEP	K.AGDFFLLGGPTEM(+15.99).K	Oxidation (M), non-specific cleavage	1369.62	-0.6	685.818	2	54783	340	352
trypsin	K.AGDFFLLGGPTEMK.W		1481.72	2	741.87	2	49078	340	353
Glu-C	K.AGDFFLLGGPTEMK.W		1481.72		741.869	2	46489	340	353
LEP	A.GDFFLLGGPTEMK.W	non-specific cleavage	1410.69	-0.1	706.35	2	50532	341	353
Glu-C	D.FFLLGGPTEMK.W	non-specific cleavage	1238.64		620.327	2	45142	343	353
LEP	D.FFLLGGPTEMK.W	non-specific cleavage	1238.64	3.4	620.328	2	48698	343	353
Glu-C	D.FFLLGGPTEM(+15.99)K.W	Oxidation (M)	1254.63		628.321	2	40993	343	353
LEP	K.WGFYRAYHFDVTDSVASIDDDGHGHYYVK.S	LEP Peptide	3419.53	2.4	684.914	5	41802	354	382
trypsin	K.WGFYR.A		727.344	1.4	364.68	2	26746	354	358
LEP	Y.RAYHFDVTDSVASIDDDGHGHYYVK.S	non-specific cleavage	2866.29	-1	717.58	4	30299	358	382
Glu-C	R.AYHFDVTDSVASIDDDGHGHYYVK.S	non-specific cleavage	2710.19		678.556	4	30775	359	382
LEP	R.AYHFDVTDSVASIDDDGHGHYYVK.S	non-specific cleavage	2710.19	0.2	1356.1	2	34082	359	382
trypsin	R.AYHFDVTDSVASIDDDGHGHYYVK.S		2710.19	0.4	904.405	3	32331	359	382
LEP	A.YHFDVTDSVASIDDDGHGHYYVK.S	non-specific cleavage	2639.16	1.8	528.84	5	33900	360	382
LEP	Y.HFDVTDSVA.S	non-specific cleavage	989.445	4.3	495.732	2	24081	361	369
LEP	Y.HFDVTDSVASIDDDGHGH.Y	non-specific cleavage	1922.8	0.4	641.942	3	27430	361	378
LEP	Y.HFDVTDSVASIDDDGHGHYYVK.S	non-specific cleavage	2476.09	0.5	1239.05	2	30463	361	382
LEP	T.DSVASIDDDGHGHYYVK.S	non-specific cleavage	1876.82	3.2	626.617	3	34092	366	382
LEP	D.SVASIDDDGHGHYYVK.S	non-specific cleavage	1761.8	-4.3	588.27	3	34125	367	382
trypsin	V.ASIDDDGHGHYYVK.S	non-specific cleavage	1575.7	0.3	788.855	2	31884	369	382
LEP	V.ASIDDDGHGHYYVK.S	non-specific cleavage	1575.7	-3.3	788.852	2	33711	369	382
trypsin	A.SIDDDGHGHYYVK.S	non-specific cleavage	1504.66	0.1	753.336	2	32271	370	382
LEP	A.SIDDDGHGHYYVK.S	non-specific cleavage	1504.66	0.1	753.336	2	33709	370	382
trypsin	I.DDDGHGHYYVK.S	non-specific cleavage	1304.54	0.3	653.279	2	32265	372	382
LEP	I.DDDGHGHYYVK.S	non-specific cleavage	1304.54	-0.3	653.278	2	33715	372	382
LEP	D.DDGHGHYYVK.S	non-specific cleavage	1189.52	-0.1	595.765	2	11358	373	382
Glu-C	D.GHGHYYVK.S	non-specific cleavage	959.461		320.828	3	2537	375	382
LEP	K.SELFSVNGSALSNDILRQPTLVHRPAK.G	LEP Peptide	2948.58	-0.6	590.723	5	42227	383	409
trypsin	K.SELFSVNGSALSNDILR.Q		1820.93	2.3	911.473	2	48335	383	399
Glu-C	S.ALSNDILR.Q	non-specific cleavage	900.503		451.259	2	21407	392	399
LEP	S.ALSNDILRQPTLVHRPAK.G	non-specific cleavage	2028.16	0.5	406.639	5	24461	392	409
LEP	A.LSNDILRQPTLVHRPAK.G	non-specific cleavage	1957.12	-1.9	490.287	4	24572	393	409
LEP	L.SNDILRQPTLVHRPAK.G	non-specific cleavage	1844.04	3	462.018	4	24500	394	409
LEP	S.NDILRQPTLV.H	non-specific cleavage	1167.66	0.8	584.838	2	36303	395	404
LEP	N.DILRQPTLVHRPAK.G	non-specific cleavage	1642.96	1.2	411.748	4	18252	396	409
LEP	I.LRQPTLVHRPAK.G	non-specific cleavage	1414.85	3.4	472.626	3	24520	398	409
Glu-C	R.QPTLVHR.P	non-specific cleavage	849.482		425.748	2	5177	400	406
trypsin	R.Q(-17.03)PTLVHRPAK.G	Pyro-glu from Q	1128.64	-1	565.327	2	4300	400	409
Glu-C	R.Q(-17.03)PTLVHR.P	Pyro-glu from Q	832.456		417.235	2	5205	400	406
trypsin	L.VHRPAK.G	non-specific cleavage	706.424	-0.8	354.219	2	4289	404	409
LEP	K.GHFDKPPVPVAQANLAVRK.N	LEP Peptide	2043.14	2.4	511.793	4	25185	410	428
LEP	K.GHFDKPPVPVAQ.A	non-specific cleavage	1290.67	0.9	646.344	2	23351	410	421
Glu-C	K.GHFDKPPVPVAQANLAVR.K	non-specific cleavage	1915.04		639.354	3	26913	410	427
LEP	K.GHFDKPPVPVAQANLAVR.K	non-specific cleavage	1915.04	-2.1	639.354	3	30250	410	427
LEP	K.GHFDKPPVPVAQANLA.V	non-specific cleavage	1659.87	1.5	830.945	2	32109	410	425
trypsin	K.GHFDKPPVPVAQANLAVR.K		1915.04	-0.6	639.355	3	28046	410	427
trypsin	K.GHFDKPPVPVAQANLAVRK.N		2043.14	-3	682.051	3	22846	410	428
LEP	H.FDKPPVPVAQANLAVRK.N	non-specific cleavage	1849.06	1	617.36	3	24927	412	428
LEP	F.DKPPVPVAQANLAVRK.N	non-specific cleavage	1701.99	2.8	426.506	4	24155	413	428
LEP	K.PPVPVAQANLAVRK.N	LEP Peptide	1458.87	1.9	487.297	3	25585	415	428
LEP	V.PVAQANLAVRK.N	non-specific cleavage	1165.69	0.4	583.854	2	39398	418	428
LEP	V.AQANLAVRK.N	non-specific cleavage	969.572	1.7	485.794	2	24935	420	428
LEP	A.QANLAVRK.N	non-specific cleavage	898.535	-2.3	450.274	2	24982	421	428
LEP	Q.ANLAVRK.N	non-specific cleavage	770.476	-0.1	386.245	2	3245	422	428
trypsin	R.KNINDLTAEETYSLR.K		1765.88	3.7	589.638	3	25282	428	442
LEP	K.NIN(-17.03)DLTAEETYSLRK.A	Ammonia-loss (N)	1748.86	0.5	583.96	3	28151	429	443
LEP	K.NINDLTAEETYSLRK.A	LEP Peptide	1765.88	0.1	883.95	2	28147	429	443
LEP	K.NINDLTAEETYSLR.K	non-specific cleavage	1637.79	-0.5	819.902	2	34644	429	442
trypsin	K.NINDLTAEETYSLR.K		1637.79	0.4	819.903	2	33114	429	442
trypsin	K.NINDLTAEETYSLRK.A		1765.88	1.2	589.636	3	26053	429	443
LEP	N.INDLTAEETYSLRK.A	non-specific cleavage	1651.84	1.8	826.93	2	24412	430	443
LEP	I.NDLTAEETYSLRK.A	non-specific cleavage	1538.76	-0.6	770.386	2	28138	431	443
LEP	N.DLTAEETYSLRK.A	non-specific cleavage	1424.71	-2.3	713.363	2	28177	432	443
LEP	D.LTAEETYSLRK.A	non-specific cleavage	1309.69	-2.9	655.849	2	28206	433	443
LEP	L.TAEETYSLRK.A	non-specific cleavage	1196.6	0.4	599.309	2	28189	434	443
LEP	K.AM(+15.99)ERFQNDK.S	Oxidation (M)	1153.52	-2.9	577.765	2	2526	444	452
LEP	M.ERFQNDK.S	non-specific cleavage	935.446	-1.3	468.73	2	2543	446	452
LEP	K.SVDGYQATVEFHALPARC(+57.02)PRPDAK.D	LEP Peptide, Carbamidomethylation	2684.31	4.2	537.872	5	27496	453	476
LEP	K.SVDGYQATVEFH.A	non-specific cleavage	1351.6	-1.2	676.809	2	28302	453	464
Glu-C	K.SVDGYQATVEFHALPAR.C	non-specific cleavage	1859.92		620.98	3	30654	453	469
LEP	K.SVDGYQATVEFHALPAR.C	non-specific cleavage	1859.92	-0.7	620.979	3	33968	453	469
trypsin	K.SVDGYQATVEFHALPAR.C		1859.92	1.4	930.967	2	32013	453	469
LEP	V.DGYQATVEFHALPARC(+57.02)PRPDAK.D	Carbamidomethylation, non-specific cleavage	2498.21	1.8	833.746	3	27469	455	476
trypsin	V.DGYQATVEFHALPAR.C	non-specific cleavage	1673.82	0.8	837.916	2	32029	455	469
trypsin	D.GYQATVEFHALPAR.C	non-specific cleavage	1558.79	-1.8	780.4	2	32064	456	469
trypsin	G.YQATVEFHALPAR.C	non-specific cleavage	1501.77	0.4	751.891	2	32129	457	469
LEP	Y.QATVEFHALPARC(+57.02)PRPDAK.D	Carbamidomethylation, non-specific cleavage	2163.1	0.1	722.041	3	27561	458	476
trypsin	Y.QATVEFHALPAR.C	non-specific cleavage	1338.7	-0.6	670.359	2	32052	458	469
LEP	Q.ATVEFHALPARC(+57.02)PRPDAK.D	Carbamidomethylation, non-specific cleavage	2035.04	2.8	679.357	3	27470	459	476
trypsin	Q.ATVEFHALPAR.C	non-specific cleavage	1210.65	-4	606.328	2	32092	459	469
LEP	A.TVEFHALPARC(+57.02)PRPDAK.D	Carbamidomethylation, non-specific cleavage	1964.01	2.5	492.01	4	18708	460	476
LEP	A.TVEFHALPAR.C	non-specific cleavage	1139.61	1.2	380.877	3	22906	460	469
trypsin	A.TVEFHALPAR.C	non-specific cleavage	1139.61	0.9	570.812	2	32067	460	469
LEP	T.VEFHALPARC(+57.02)PRPDAK.D	Carbamidomethylation, non-specific cleavage	1862.96	1.5	466.747	4	17411	461	476
LEP	V.EFHALPARC(+57.02)PRPDAK.D	Carbamidomethylation, non-specific cleavage	1763.89	4.1	588.973	3	18633	462	476
Glu-C	E.FHALPAR.C		810.45		406.233	2	8922	463	469
trypsin	H.RLFVTQVEDALLR.R	non-specific cleavage	1558.88	0.4	520.635	3	44320	494	506
Glu-C	R.LFVTQVEDALLR.R	non-specific cleavage	1402.78		702.399	2	41578	495	506
LEP	R.LFVTQVEDALLRRGS.T	non-specific cleavage	1702.94	0.9	568.653	3	49370	495	509
LEP	R.LFVTQVEDALLR.R	non-specific cleavage	1402.78	0.8	702.399	2	53746	495	506
trypsin	R.LFVTQVEDALLR.R		1402.78	1.4	702.399	2	50633	495	506
trypsin	R.LFVTQVEDALLRR.G		1558.88	1.3	780.45	2	47348	495	507
trypsin	F.VTQVEDALLR.R	non-specific cleavage	1142.63	-0.2	572.322	2	27734	497	506
trypsin	F.VTQVEDALLRR.G	non-specific cleavage	1298.73	0.5	650.373	2	47411	497	507
trypsin	V.TQVEDALLRR.G	non-specific cleavage	1199.66	0.1	600.838	2	47457	498	507
trypsin	T.QVEDALLR.R	non-specific cleavage	942.513	2.5	472.265	2	21128	499	506
trypsin	Q.VEDALLR.R	non-specific cleavage	814.455	1.2	408.235	2	17946	500	506
Glu-C	E.TYLDPVTGETK.N	non-specific cleavage	1222.61		612.313	2	21044	533	543
LEP	K.NNPFHHAQVAFENGVTSRNPDAK.L	LEP Peptide	2549.22	0.8	850.746	3	22192	544	566
trypsin	K.NNPFHHAQVAFENGVTSR.N		2023.96	0.6	675.661	3	21704	544	561
LEP	H.HAQVAFENGVTSRNPDAK.L	non-specific cleavage	1939.95	1.8	647.658	3	15082	549	566
trypsin	N.AIHAWVGGSEK.Y	non-specific cleavage	1153.59	-0.5	385.536	3	13176	605	615
LEP	N.AIHAWVGGSEK.Y	non-specific cleavage	1153.59	-0.6	385.536	3	15525	605	615
Glu-C	A.IHAWVGGSEK.Y	non-specific cleavage	1082.55		361.858	3	10487	606	615
trypsin	A.IHAWVGGSEK.Y	non-specific cleavage	1082.55	-0.9	542.282	2	11546	606	615
LEP	A.IHAWVGGSEK.Y	non-specific cleavage	1082.55	0.4	542.283	2	13791	606	615
Glu-C	K.YSMSSLHYT.A	non-specific cleavage	1087.46	0.2	544.74	2	21523	616	624
Glu-C	K.YSMSSLHY.T	non-specific cleavage	986.417	1.6	494.216	2	23442	616	623
Glu-C	K.YSMSSLHYTAFDPIFYLH.H	non-specific cleavage	2191.01	0.1	731.343	3	49158	616	633
trypsin	K.YSMSSLHYTAFDPIFYLH.H	non-specific cleavage	2191.01	2.6	1096.51	2	50806	616	633
LEP	K.YSMSSLHYTAFDPIFYLHH.S	non-specific cleavage	2328.07	-3.6	777.027	3	51140	616	634
trypsin	K.YSM(+15.99)SSLHYTAFDPIFYLH.H	Oxidation (M), non-specific cleavage	2207	0.3	736.675	3	50498	616	633
trypsin	K.YSM(+15.99)SSLHYTAFDPIFYLH.H	Oxidation (M), non-specific cleavage	2207	0.3	736.675	3	50498	616	633
trypsin	K.YSMSSLHYTAFDPIFYLHHSNVDR.L		2899.34	-0.2	967.453	3	44573	616	639
Glu-C	K.YSMSSLHYTAFDPIFYLHHSNVDR.L		2899.34	2	725.843	4	43187	616	639
trypsin	Y.SMSSLHYTAFDPIFYLHHSNVDR.L	non-specific cleavage	2736.28	2.5	548.264	5	42383	617	639
trypsin	Y.SM(+15.99)SSLHYTAFDPIFYLHHSNVDR.L	Oxidation (M), non-specific cleavage	2752.27	0.4	551.462	5	40331	617	639
trypsin	Y.SM(+15.99)SSLHYTAFDPIFYLHHSNVDR.L	Oxidation (M), non-specific cleavage	2752.27	0.4	551.462	5	40331	617	639
Glu-C	M.SSLHYTAFDPIFYLHHSNVDR.L	non-specific cleavage	2518.2	-0.7	630.558	4	38802	619	639
trypsin	M.SSLHYTAFDPIFYLHHSNVDR.L	non-specific cleavage	2518.2	0	630.558	4	40263	619	639
Glu-C	M.SSLHYTAFDPIFYLHH.S	non-specific cleavage	1946.93	-0.2	487.74	4	43700	619	634
LEP	M.SSLHYTAFDPIFYLHH.S	non-specific cleavage	1946.93	0.3	649.985	3	47058	619	634
trypsin	S.SLHYTAFDPIFYLHHSNVDR.L	non-specific cleavage	2431.17	2.6	608.802	4	40379	620	639
Glu-C	S.SLHYTAFDPIFYLHH.S	non-specific cleavage	1859.9	0.3	620.974	3	43975	620	634
LEP	S.SLHYTAFDPIFYLHH.S	non-specific cleavage	1859.9	1.4	465.983	4	47270	620	634
LEP	S.SLHYTAFDPIFYLH.H	non-specific cleavage	1722.84	0.9	575.288	3	52632	620	633
Glu-C	S.SLHYTAFDPIFYLHHSNVDR.L	non-specific cleavage	2431.17	1.8	608.801	4	55109	620	639
trypsin	S.LHYTAFDPIFYLHHSNVDR.L	non-specific cleavage	2344.14	-2.1	587.041	4	39851	621	639
trypsin	L.HYTAFDPIFYLHHSNVDR.L	non-specific cleavage	2231.05	-0.6	558.771	4	36628	622	639
trypsin	H.YTAFDPIFYLHHSNVDR.L	non-specific cleavage	2094	-0.6	699.005	3	41568	623	639
Glu-C	Y.TAFDPIFYLHHSNVDR.L	non-specific cleavage	1930.93	3.2	644.654	3	36794	624	639
trypsin	Y.TAFDPIFYLHHSNVDR.L	non-specific cleavage	1930.93	1.9	483.741	4	38366	624	639
Glu-C	T.AFDPIFYLHHSNVDR.L	non-specific cleavage	1829.88	-5.1	610.966	3	39860	625	639
Glu-C	A.FDPIFYLHHSNVDR.L	non-specific cleavage	1758.85	2.1	587.291	3	33678	626	639
Glu-C	D.PIFYLHHSNVDR.L		1496.75	3.6	499.926	3	33750	628	639
Glu-C	I.FYLHHSNVDR.L	non-specific cleavage	1286.62	3.6	644.317	2	42840	630	639
Glu-C	F.YLHHSNVDR.L	non-specific cleavage	1139.55	1.9	570.782	2	38918	631	639
trypsin	F.YLHHSNVDR.L	non-specific cleavage	1139.55	-1.7	570.78	2	44596	631	639
trypsin	R.LWAIWQALQIR.R		1396.8	2.8	699.408	2	51786	640	650
Glu-C	R.LWAIWQALQIR.R		1396.8	-1.6	699.405	2	50135	640	650
LEP	K.AHC(+57.02)ASSQEREPLK.P	Carbamidomethylation, non-specific cleavage	1511.72	-1.3	504.912	3	2600	657	669
LEP	S.SQEREPLK.P	non-specific cleavage	985.519	1.4	493.768	2	8480	662	669
LEP	H.YRYDDLQFGGMTMSELEEYIHK.Q	non-specific cleavage	2724.22	0.3	682.062	4	52860	701	722
LEP	M.TMSELEEYIHK.Q	non-specific cleavage	1378.64	2.7	460.556	3	30754	712	722
LEP	K.VGSFVVLGGSK.E	LEP Peptide	1048.59	1.5	525.304	2	33021	758	768
trypsin	K.VGSFVVLGGSK.E		1048.59	1.8	525.304	2	30871	758	768
Glu-C	K.VGSFVVLGGSK.E		1048.59	1.1	525.304	2	29531	758	768
LEP	K.WGFDRMYK.Y	LEP Peptide	1101.51	0.8	551.761	2	27442	772	779
LEP	G.FDRMYK.Y	non-specific cleavage	858.406	0.5	430.21	2	29008	774	779
LEP	G.FDRM(+15.99)YK.Y	Oxidation (M), non-specific cleavage	874.401	1.7	438.208	2	21854	774	779
LEP	G.FDRM(+15.99)YK.Y	Oxidation (M), non-specific cleavage	874.401	1.7	438.208	2	21854	774	779
LEP	K.YEITEALK.T	LEP Peptide	965.507	0.2	483.761	2	27368	780	787
LEP	R.RAMADLQDDK.T	non-specific cleavage	1161.54	3.3	581.782	2	8736	854	863
LEP	R.RAM(+15.99)ADLQDDK.T	Oxidation (M), non-specific cleavage	1177.54	0.4	393.521	3	8673	854	863
LEP	R.RAM(+15.99)ADLQDDK.T	Oxidation (M), non-specific cleavage	1177.54	0.4	393.521	3	8673	854	863
LEP	R.AMADLQDDK.T	non-specific cleavage	1005.44	-0.2	503.729	2	12980	855	863
LEP	R.AM(+15.99)ADLQDDK.T	Oxidation (M), non-specific cleavage	1021.44	2.2	511.728	2	12396	855	863
LEP	R.AM(+15.99)ADLQDDK.T	Oxidation (M), non-specific cleavage	1021.44	2.2	511.728	2	12396	855	863
trypsin	R.AMADLQDDK.T		1005.44	-1	503.729	2	10298	855	863
LEP	K.TSGGFQQIAAFHGEPK.W	LEP Peptide	1673.82	-0.2	837.915	2	28361	864	879
trypsin	K.TSGGFQQIAAFHGEPK.W		1673.82	1.8	558.947	3	26386	864	879
trypsin	S.GGFQQIAAFHGEPK.W	non-specific cleavage	1485.74	0.5	743.876	2	25503	866	879
LEP	S.GGFQQIAAFHGEPK.W	non-specific cleavage	1485.74	3.7	496.255	3	27555	866	879
LEP	F.QQIAAFHGEPK.W	non-specific cleavage	1224.63	-0.7	613.319	2	22434	869	879
trypsin	F.QQIAAFHGEPK.W	non-specific cleavage	1224.63	-0.3	613.32	2	25593	869	879
LEP	Q.IAAFHGEPK.W	non-specific cleavage	968.508	2	485.262	2	22352	871	879
LEP	I.AAFHGEPK.W	non-specific cleavage	855.424	0.7	428.719	2	22335	872	879
LEP	K.WC(+57.02)PSPEAEK.K	LEP Peptide, Carbamidomethylation	1102.48	0.6	552.245	2	15579	880	888
LEP	H.GMAVFPHWHR.L	non-specific cleavage	1236.6	2.6	413.207	3	25779	896	905
LEP	M.AVFPHWHR.L	non-specific cleavage	1048.54	1.2	350.519	3	18330	898	905
trypsin	M.AVFPHWHR.L	non-specific cleavage	1048.54	3.6	525.277	2	23865	898	905
LEP	H.WHRLLTVQGENALRK.H	non-specific cleavage	1820.02	1.6	456.012	4	20205	903	917
LEP	W.HRLLTVQGENALRK.H	non-specific cleavage	1633.94	0	409.492	4	14816	904	917
LEP	H.RLLTVQGENALRK.H	non-specific cleavage	1496.88	-1.5	499.966	3	17219	905	917
trypsin	R.LLT(-18.01)VQGENALR.K	Dehydration	1194.67	-4.1	598.341	2	25644	906	916
trypsin	R.LLT(-18.01)VQGENALRK.H	Dehydration	1322.77	0.1	441.93	3	18796	906	917
LEP	R.LLTVQGENALRK.H	non-specific cleavage	1340.78	2	447.934	3	21205	906	917
LEP	R.LLTVQGENALR.K	non-specific cleavage	1212.68	1	607.349	2	27947	906	916
trypsin	R.LLTVQGENALR.K		1212.68	2.7	607.35	2	26001	906	916
trypsin	R.LLTVQGENALRK.H		1340.78	1.3	447.934	3	18794	906	917
Glu-C	R.LLTVQGENALR.K		1212.68	2.4	607.35	2	24787	906	916
Glu-C	R.LLTVQGENALRK.H		1340.78	0	671.396	2	18081	906	917
trypsin	L.LTVQGENALRK.H	non-specific cleavage	1227.69	0.7	614.854	2	18765	907	917
LEP	L.LTVQGENALRK.H	non-specific cleavage	1227.69	2.1	614.855	2	21241	907	917
trypsin	L.LTVQGENALR.K	non-specific cleavage	1099.6	1.9	550.808	2	25691	907	916
trypsin	L.TVQGENALRK.H	non-specific cleavage	1114.61	-1.7	558.311	2	18739	908	917
LEP	L.TVQGENALRK.H	non-specific cleavage	1114.61	0.3	372.544	3	21321	908	917
trypsin	L.TVQGENALR.K	non-specific cleavage	986.514	-1.4	494.264	2	25665	908	916
trypsin	T.VQGENALRK.H	non-specific cleavage	1013.56	1.2	507.789	2	18837	909	917
LEP	T.VQGENALRK.H	non-specific cleavage	1013.56	2.6	507.789	2	21258	909	917
LEP	Q.GENALRK.H	non-specific cleavage	786.435	1.2	394.225	2	21263	911	917
LEP	K.HGFTGGLPYWDWTR.S	non-specific cleavage	1691.78	-1.6	846.898	2	45726	918	931
trypsin	K.HGFTGGLPYWDWTR.S		1691.78	1.8	846.901	2	44141	918	931
Glu-C	K.HGFTGGLPYWDWTR.S		1691.78	-1.9	564.934	3	42158	918	931
Glu-C	F.TGGLPYWDWTR.S	non-specific cleavage	1350.64	1	676.326	2	42591	921	931
Glu-C	H.HGHIDSVGHDTTR.D	non-specific cleavage	1430.66	-0.9	477.895	3	2501	960	972
Glu-C	H.GHIDSVGHDTTR.D	non-specific cleavage	1293.61	-0.9	432.209	3	2836	961	972
Glu-C	I.DSVGHDTTR.D	non-specific cleavage	986.442	-3.9	494.226	2	17096	964	972
LEP	D.VRDDLYQSPGFGHYTDIAK.Q	non-specific cleavage	2181.05	-0.5	728.023	3	29791	974	992
trypsin	R.DDLYQSPGFGH.Y	non-specific cleavage	1234.53	0.3	618.27	2	25470	976	986
trypsin	R.DDLYQSPGFGHYTDIAK.Q		1925.88	0.7	642.968	3	32443	976	992
Glu-C	R.DDLYQSPGFGHYTD.I		1613.66	-1.8	807.837	2	29409	976	989
trypsin	D.LYQSPGFGHYTDIAK.Q	non-specific cleavage	1695.83	3.4	566.284	3	32521	978	992
trypsin	L.YQSPGFGHYTDIAK.Q	non-specific cleavage	1582.74	-1.9	792.376	2	32496	979	992
trypsin	Y.QSPGFGHYTDIAK.Q	non-specific cleavage	1419.68	5.3	710.85	2	32468	980	992
trypsin	Q.SPGFGHYTDIAK.Q	non-specific cleavage	1291.62	-1	646.817	2	28642	981	992
LEP	Q.SPGFGHYTDIAK.Q	non-specific cleavage	1291.62	1.2	646.818	2	30574	981	992
trypsin	S.PGFGHYTDIAK.Q	non-specific cleavage	1204.59	3.2	603.303	2	28525	982	992
Glu-C	E.IAHNFIHALVGGNEPYSM(+15.99)SSLR.Y	Oxidation (M)	2428.2	-0.9	810.405	3	31839	1012	1033
Glu-C	E.IAHNFIHALVGGNEPYSMSSLR.Y		2412.2	-0.2	604.057	4	36959	1012	1033
trypsin	A.HNFIHALVGGNEPYSMSSLR.Y	non-specific cleavage	2228.08	1.9	558.028	4	35532	1014	1033
trypsin	H.NFIHALVGGNEPYSMSSLR.Y	non-specific cleavage	2091.02	0	698.014	3	40881	1015	1033
trypsin	F.IHALVGGNEPYSMSSLR.Y	non-specific cleavage	1829.91	1.9	610.978	3	30062	1017	1033
Glu-C	H.ALVGGNEPYSMSSLR.Y	non-specific cleavage	1579.77	0.8	790.891	2	30199	1019	1033
trypsin	H.ALVGGNEPYSMSSLR.Y	non-specific cleavage	1579.77	3.4	790.893	2	30886	1019	1033
trypsin	H.ALL(sub V)GGNEPYSMSSLR.Y	non-specific cleavage	1593.78	-1.5	797.897	2	35140	1019	1033
LEP	H.ALVGGNEPYSMSSLRYTTYDPIFFLH.R	non-specific cleavage	2977.43	1.2	993.486	3	54328	1019	1044
trypsin	H.ALVGGNEPYSM(+15.99)SSLR.Y	Oxidation (M), non-specific cleavage	1595.76	0.7	798.889	2	26668	1019	1033
LEP	H.ALVGGNEPYSM(+15.99)SSLR.Y	Oxidation (M), non-specific cleavage	1595.76	1.9	798.889	2	25782	1019	1033
LEP	H.ALVGGNEPYSM(+15.99)SSLR.Y	Oxidation (M), non-specific cleavage	1595.76	1.9	798.889	2	25782	1019	1033
trypsin	H.ALVGGNEPYSM(+15.99)SSLR.Y	Oxidation (M), non-specific cleavage	1595.76	0.7	798.889	2	26668	1019	1033
trypsin	A.LVGGNEPYSMSSLR.Y	non-specific cleavage	1508.73	-6.5	755.367	2	28316	1020	1033
Glu-C	L.VGGNEPYSMSSLR.Y	non-specific cleavage	1395.65	2	698.831	2	21856	1021	1033
trypsin	L.VGGNEPYSMSSLR.Y	non-specific cleavage	1395.65	4.4	698.833	2	31932	1021	1033
trypsin	N.EPYSMSSLR.Y	non-specific cleavage	1068.49	-0.4	535.253	2	20138	1025	1033
LEP	S.SLRYTTYDPIFFLH.R	non-specific cleavage	1771.89	2.1	591.64	3	51024	1031	1044
trypsin	R.GKPYNTANC(+57.02)AIASMR.K	Carbamidomethylation	1652.78	1.1	551.933	3	16361	1063	1077
trypsin	K.PYNTANC(+57.02)AIASMR.K	Carbamidomethylation	1467.66	1.5	734.838	2	21849	1065	1077
Glu-C	K.PYNTANC(+57.02)AIASMR.K	Carbamidomethylation	1467.66	0.3	734.837	2	20521	1065	1077
trypsin	K.PYNTANC(+57.02)AIASM(+15.99)R.K	Carbamidomethylation; Oxidation (M)	1483.65	1.5	742.836	2	13354	1065	1077
LEP	K.PYNTANC(+57.02)AIASMRK.P	LEP Peptide, Carbamidomethylation	1595.75	2	532.927	3	18561	1065	1078
trypsin	N.TANC(+57.02)AIASMR.K	Carbamidomethylation, non-specific cleavage	1093.5	-1.1	547.757	2	13615	1068	1077
trypsin	N.C(+57.02)AIASMR.K	Carbamidomethylation, non-specific cleavage	807.373	-0.5	404.694	2	10713	1071	1077
trypsin	R.KPLQPFGLDSVINPDDETR.E		2140.08	2.2	714.369	3	41064	1078	1096
LEP	K.PLQPFGLDSVINPDDETREHSVPFRVFDYK.N	LEP Peptide	3516.73	-0.9	1173.25	3	50909	1079	1108
LEP	K.PLQPFGLDSVINPDDETREH.S	non-specific cleavage	2278.09	1.4	1140.05	2	46188	1079	1098
LEP	K.PLQPFGLDSVINPDDETREHSVPFR.V	non-specific cleavage	2864.41	0.1	717.11	4	46493	1079	1103
LEP	K.PLQPFGLDSVINPDDETR.E	non-specific cleavage	2011.98	0.7	1007	2	50226	1079	1096
trypsin	K.PLQPFGLDSVINPDDETR.E		2011.98	2.8	1007	2	46012	1079	1096
trypsin	K.PLQPFGLDSVINPDDETREHSVPFR.V		2864.41	0.1	717.11	4	44909	1079	1103
trypsin	P.LQPFGLDSVINPDDETR.E	non-specific cleavage	1914.93	2.2	958.476	2	46856	1080	1096
trypsin	F.GLDSVINPDDETREH.S	non-specific cleavage	1695.77	0.4	566.264	3	23012	1084	1098
Glu-C	F.GLDSVINPDDETR.E	non-specific cleavage	1429.67	0.7	715.842	2	25039	1084	1096
LEP	F.GLDSVINPDDETREH.S	non-specific cleavage	1695.77	1.4	848.893	2	25059	1084	1098
trypsin	F.GLDSVINPDDETR.E	non-specific cleavage	1429.67	1.3	715.842	2	26193	1084	1096
trypsin	L.DSVINPDDETR.E	non-specific cleavage	1259.56	2.1	630.79	2	14395	1086	1096
trypsin	L.DSVINPDDETREH.S	non-specific cleavage	1525.66	-2.5	763.838	2	22621	1086	1098
LEP	L.DSVINPDDETREH.S	non-specific cleavage	1525.66	1.3	763.841	2	25087	1086	1098
LEP	D.SVINPDDETREH.S	non-specific cleavage	1410.64	2.2	706.328	2	12085	1087	1098
trypsin	R.E(-18.01)HSVPFR.V	Pyro-glu from E	852.424	0.4	427.219	2	8985	1097	1103
trypsin	R.EHSVPFR.V		870.435	0.6	436.225	2	8935	1097	1103
LEP	P.FRVFDYK.N	non-specific cleavage	973.502	-0.4	487.758	2	35342	1102	1108
LEP	K.NNFDYEYESLAFNGLSIAQLDRELQRRK.S	LEP Peptide	3388.68	-0.5	678.743	5	52022	1109	1136
LEP	K.NNFDYEYESLAFNGLSIAQLDRELQR.R	non-specific cleavage	3104.48	0.2	1035.84	3	54312	1109	1134
LEP	K.NNFDYEYESLAFNGLSIAQLDR.E	non-specific cleavage	2578.2	-0.8	860.406	3	54537	1109	1130
trypsin	K.NNFDYEYESLAFNGLSIAQLDRELQR.R		3104.48	0.8	1035.84	3	50974	1109	1134
trypsin	K.NNFDYEYESLAFNGLSIAQLDRELQRRK.S		3388.68	1	678.744	5	50012	1109	1136
Glu-C	E.YESLAFNGLSIAQLDR.E		1795.91	0.7	898.963	2	48269	1115	1130
trypsin	Y.ESLAFNGLSIAQLDR.E	non-specific cleavage	1632.85	0.9	817.432	2	48816	1116	1130
Glu-C	E.SLAFN(-17.03)GLSIAQLDR.E	Ammonia-loss (N)	1486.78	-8.2	744.39	2	45949	1117	1130
LEP	E.SLAFNGLSIAQLDRELQRRK.S	non-specific cleavage	2314.29	1.4	772.437	3	51871	1117	1136
Glu-C	E.SLAFNGLSIAQLDR.E		1503.8	2.3	752.911	2	46374	1117	1130
LEP	S.LAFNGLSIAQLDRELQRRK.S	non-specific cleavage	2227.25	2.2	557.822	4	42282	1118	1136
trypsin	S.LAFNGLSIAQLDR.E	non-specific cleavage	1416.77	1.4	709.394	2	47165	1118	1130
LEP	S.LAFNGLSIAQLDR.E	non-specific cleavage	1416.77	1.1	709.394	2	48943	1118	1130
LEP	S.LAFNGLSIAQLDRELQR.R	non-specific cleavage	1943.06	0.8	648.694	3	50409	1118	1134
Glu-C	L.AFNGLSIAQLDR.E	non-specific cleavage	1303.69	1.3	652.852	2	38534	1119	1130
trypsin	L.AFNGLSIAQLDR.E	non-specific cleavage	1303.69	0.4	652.852	2	40057	1119	1130
LEP	L.AFNGLSIAQLDR.E	non-specific cleavage	1303.69	-0.2	652.851	2	42031	1119	1130
LEP	L.AFNGLSIAQLDRELQR.R	non-specific cleavage	1829.97	2.6	611	3	45402	1119	1134
trypsin	A.FNGLSIAQLDR.E	non-specific cleavage	1232.65	0.9	617.333	2	38446	1120	1130
trypsin	F.NGLSIAQLDR.E	non-specific cleavage	1085.58	1.2	543.799	2	29155	1121	1130
LEP	N.GLSIAQLDR.E	non-specific cleavage	971.54	1	486.778	2	30868	1122	1130
LEP	N.GLSIAQLDRELQR.R	non-specific cleavage	1497.83	1.2	500.283	3	37846	1122	1134
LEP	L.SIAQLDRELQR.R	non-specific cleavage	1327.72	0.8	443.581	3	23767	1124	1134
LEP	S.IAQLDRELQR.R	non-specific cleavage	1240.69	-0.3	414.57	3	18381	1125	1134
LEP	K.SHDRVFAGFLLHEIGQS.A	non-specific cleavage	1911.96	1.8	478.998	4	43988	1137	1153
LEP	K.SHD(-18.01)RVFAGFLLHEIGQSALVK.F	Dehydration	2305.23	0.8	577.316	4	44356	1137	1157
LEP	K.SHDRVFAGFLLHEIGQS(-18.01)ALVK.F	Dehydration	2305.23	2.4	462.055	5	46100	1137	1157
LEP	K.SHDRVFAGFLLHEIGQSALVK.F	LEP Peptide	2323.24	-0.1	581.818	4	46045	1137	1157
trypsin	K.SHDRVFAGFLLHEIGQSALVK.F		2323.24	4.3	775.425	3	44703	1137	1157
LEP	H.DRVFAGFLLHEIGQSALVK.F	non-specific cleavage	2099.15	2.3	700.726	3	52250	1139	1157
LEP	R.VFAGFLLHEIGQS.A	non-specific cleavage	1416.74	2.3	709.379	2	52859	1141	1153
LEP	R.VFAGFLLHEIGQSALVK.F	non-specific cleavage	1828.02	0.1	915.02	2	53176	1141	1157
trypsin	R.VFAGFLLHEIGQSALVK.F		1828.02	0.1	915.02	2	50455	1141	1157
Glu-C	R.VFAGFLLHE.I		1031.54	2.1	516.78	2	44185	1141	1149
LEP	F.AGFLLHEIGQSALVK.F	non-specific cleavage	1581.89	2.1	791.953	2	40982	1143	1157
trypsin	F.AGFLLHEIGQSALVK.F	non-specific cleavage	1581.89	-2.6	791.949	2	50479	1143	1157
LEP	A.GFLLHEIGQSALVK.F	non-specific cleavage	1510.85	-1.7	504.623	3	39630	1144	1157
LEP	G.FLLHEIGQSALVK.F	non-specific cleavage	1453.83	1	485.618	3	36706	1145	1157
LEP	F.LLHEIGQSALVK.F	non-specific cleavage	1306.76	2.7	654.389	2	24781	1146	1157
LEP	L.LHEIGQSALVK.F	non-specific cleavage	1193.68	1.7	398.9	3	18061	1147	1157
LEP	H.EIGQSALVK.F	non-specific cleavage	943.534	0.2	472.774	2	18452	1149	1157
LEP	K.FYVC(+57.02)K.H	LEP Peptide, Carbamidomethylation	715.336	0.4	358.676	2	13865	1158	1162
Glu-C	E.FYILGDEAEM(+15.99)PWR.Y	Oxidation (M)	1641.75	1.3	821.883	2	45254	1175	1187
Glu-C	E.FYILGDEAEMPWR.Y		1625.75	1	813.885	2	48133	1175	1187
Glu-C	Y.ILGDEAEMPWR.Y	non-specific cleavage	1315.62	1.5	658.82	2	35271	1177	1187
Glu-C	E.AEMPWR.Y		788.364	-0.1	395.189	2	19467	1182	1187
LEP	K.YEITQQLHDLDLHVGD(-18.01)NFFLK.Y	Dehydration	2526.25	-2.2	843.09	3	51918	1194	1214
LEP	K.YEITQQLHDLDLHVGDNFFLK.Y	LEP Peptide	2544.26	1.7	849.097	3	51944	1194	1214
LEP	K.YEITQQLHDL.D	non-specific cleavage	1258.62	2.7	630.319	2	36523	1194	1203
trypsin	K.YEITQQLHDLDLHVGDNFFLK.Y		2544.26	1.7	849.097	3	50090	1194	1214
Glu-C	K.YEITQQLHDLD.L		1373.65	-1.4	687.83	2	30647	1194	1204
LEP	Y.EITQQLHDLDLHVGDNFFLK.Y	non-specific cleavage	2381.2	-4.1	596.305	4	49584	1195	1214
LEP	E.ITQQLHDLDLHVGDNFFLK.Y	non-specific cleavage	2252.16	3	751.729	3	51974	1196	1214
Glu-C	E.ITQQLHDLDLHVGD.N		1602.8	-0.4	535.274	3	29903	1196	1209
LEP	I.TQQLHDLDLHVGDNFFLK.Y	non-specific cleavage	2139.07	0.4	714.033	3	52034	1197	1214
LEP	T.QQLHDLDLHVGDNFFLK.Y	non-specific cleavage	2038.03	-2.3	680.348	3	44319	1198	1214
LEP	Q.LHDLDLHVGDNFFLK.Y	non-specific cleavage	1781.91	2.2	594.979	3	44611	1200	1214
LEP	H.DLDLHVGDNFFLK.Y	non-specific cleavage	1531.77	-2.1	766.889	2	50268	1202	1214
LEP	D.LDLHVGDNFFLK.Y	non-specific cleavage	1416.74	0.6	473.254	3	46770	1203	1214
LEP	D.LHVGDNFFLK.Y	non-specific cleavage	1188.63	1	397.217	3	35822	1205	1214
LEP	H.VGDNFFLK.Y	non-specific cleavage	938.486	1.4	470.251	2	34936	1207	1214
LEP	G.DNFFLK.Y	non-specific cleavage	782.396	0.7	392.206	2	33735	1209	1214
LEP	K.YEAFDLNGGSLGGSIFSQPSVIFEPAAGSHQADEYREAVTSASHIRK.N	LEP Peptide	4995.41	-1.2	1249.86	4	49967	1215	1261
LEP	K.YEAFDLNGGSLGGSIFSQPSVIFEPAAGSHQADEYREA.V	non-specific cleavage	4015.85	2.8	1339.63	3	54121	1215	1252
LEP	K.YEAFDLNGGSLGGSIFSQPSVIFEPAAGSHQA.D	non-specific cleavage	3252.54	0.4	1085.19	3	54697	1215	1246
LEP	K.YEAFDLNGGSLGGSIFSQPSVIFEPAAGSHQAD.E	non-specific cleavage	3367.56	-0.9	1123.53	3	54752	1215	1247
LEP	K.YEAFDLNGGSLGGSIFSQPSVIFEPAAGSH.Q	non-specific cleavage	3053.44	0.9	1018.82	3	54938	1215	1244
trypsin	K.YEAFDLNGGSLGGSIFSQPSVIFEPAAGSHQADEYREAVTSASHIRK.N		4995.41	7	1000.1	5	48963	1215	1261
trypsin	Y.EAFDLNGGSLGGSIFSQPSVIFEPAAGSHQADEYR.E	non-specific cleavage	3652.71	4.8	1218.58	3	50734	1216	1250
Glu-C	E.AFDLNGGSLGGSIFSQPSVIFEPAAGSH.Q	non-specific cleavage	2761.33	1.8	1381.68	2	49865	1217	1244
Glu-C	E.AFDLNGGSLGGSIFSQPSVIFEPAAGSHQADE.Y		3204.5	-1.9	1069.17	3	49607	1217	1248
Glu-C	E.AFDLNGGSLGGSIFSQPSVIFEPAAGSHQADEYR.E		3523.66	0.4	881.924	4	49078	1217	1250
trypsin	F.DLNGGSLGGSIFSQPSVIFEPAAGSHQADEYR.E	non-specific cleavage	3305.56	-4.3	1102.86	3	50492	1219	1250
Glu-C	S.IFSQPSVIFEPAAGSHQADEYR.E	non-specific cleavage	2448.17	0.4	817.065	3	36439	1229	1250
trypsin	S.IFSQPSVIFEPAAGSH.Q	non-specific cleavage	1685.84	0.9	843.929	2	43724	1229	1244
LEP	I.FSQPSVIFEPAAGSHQADEYREAVTSASHIRK.N	non-specific cleavage	3514.72	0.8	586.795	6	34646	1230	1261
trypsin	F.SQPSVIFEPAAGSHQADEYR.E	non-specific cleavage	2188.02	-1.2	730.346	3	27405	1231	1250
Glu-C	F.SQPSVIFEPAAGSH.Q	non-specific cleavage	1425.69	-0.7	713.851	2	29773	1231	1244
LEP	Q.PSVIFEPAAGSHQADEYREAVTSASHIRK.N	non-specific cleavage	3152.56	1.9	789.15	4	49980	1233	1261
LEP	S.VIFEPAAGSHQADEYREAVTSASHIRK.N	non-specific cleavage	2968.48	-4.5	743.124	4	28219	1235	1261
LEP	A.AGSHQADEYREAVTSASHIRK.N	non-specific cleavage	2312.13	-2	463.432	5	15440	1241	1261
LEP	S.HQADEYREAVTSASHIRK.N	non-specific cleavage	2097.04	0.7	420.415	5	14550	1244	1261
LEP	Q.ADEYREAVTSASHIRK.N	non-specific cleavage	1831.92	2.5	458.988	4	15033	1246	1261
LEP	A.DEYREAVTSASHIRK.N	non-specific cleavage	1760.88	2.5	441.228	4	14709	1247	1261
LEP	D.EYREAVTSASHIRK.N	non-specific cleavage	1645.85	-0.2	549.625	3	8359	1248	1261
LEP	E.YREAVTSASHIRK.N	non-specific cleavage	1516.81	2.4	506.612	3	14776	1249	1261
LEP	Y.REAVTSASHIRK.N	non-specific cleavage	1353.75	-2.7	452.255	3	2428	1250	1261
trypsin	R.EAVTSASHIR.K		1069.55	0.1	357.524	3	4980	1251	1260
LEP	E.AVTSASHIRK.N	non-specific cleavage	1068.6	-2.9	357.208	3	2347	1252	1261
trypsin	A.VTSASHIR.K	non-specific cleavage	869.472	0.4	435.743	2	5433	1253	1260
LEP	V.TSASHIRK.N	non-specific cleavage	898.498	-3.9	450.255	2	2434	1254	1261
trypsin	V.TSASHIR.K	non-specific cleavage	770.404	-1.9	386.208	2	5429	1254	1260
LEP	T.SASHIRK.N	non-specific cleavage	797.451	-4	399.731	2	2435	1255	1261
LEP	K.NIRDLSEGEIESIRSAFLQIQK.E	LEP Peptide	2545.35	1.7	637.346	4	51878	1262	1283
LEP	K.NIRDLSEGEIESIRS.A	non-specific cleavage	1716.86	3.6	573.297	3	29342	1262	1276
LEP	K.NIRDLSEGEIESIR.S	non-specific cleavage	1629.83	2.3	544.286	3	29590	1262	1275
LEP	K.NIRDLSEGEIESIRSA.F	non-specific cleavage	1787.9	0.7	894.959	2	31822	1262	1277
LEP	K.NIRDLSEGEIESIRSAF.L	non-specific cleavage	1934.97	1.5	645.998	3	44595	1262	1278
trypsin	K.NIRDLSEGEIESIR.S		1629.83	1.2	815.924	2	27560	1262	1275
trypsin	K.NIRDLSEGEIESIRSAFLQIQK.E		2545.35	-1	637.344	4	49958	1262	1283
LEP	N.IRDLSEGEIESIRSAFLQIQK.E	non-specific cleavage	2431.31	0.9	811.444	3	48170	1263	1283
trypsin	R.DLS(-18.01)EGEIESIR.S	Dehydration	1228.59	1.1	615.305	2	27553	1265	1275
LEP	R.DLSEGEIESIRSAFLQIQK.E	non-specific cleavage	2162.12	2.6	1082.07	2	53867	1265	1283
trypsin	R.DLSEGEIESIR.S		1246.6	1	624.31	2	27915	1265	1275
Glu-C	R.DLSEGEIESIR.S		1246.6	2.1	624.311	2	26292	1265	1275
LEP	E.GEIESIRSAFLQIQK.E	non-specific cleavage	1717.94	1.8	859.977	2	51348	1269	1283
LEP	E.IESIRSAFLQIQK.E	non-specific cleavage	1531.87	0.8	766.944	2	51317	1271	1283
LEP	I.ESIRSAFLQIQK.E	non-specific cleavage	1418.79	-3.7	710.399	2	51297	1272	1283
LEP	S.IRSAFLQIQK.E	non-specific cleavage	1202.71	2	401.913	3	25639	1274	1283
LEP	R.SAFLQIQK.E	non-specific cleavage	933.528	0.2	467.772	2	27658	1276	1283
trypsin	R.SAFLQIQK.E		933.528	1.1	467.772	2	25410	1276	1283
LEP	S.AFLQIQK.E	non-specific cleavage	846.496	1	424.256	2	26915	1277	1283
LEP	A.FLQIQK.E	non-specific cleavage	775.459	0.4	388.737	2	21630	1278	1283
trypsin	A.FLQIQK.E	non-specific cleavage	775.459	-0.1	388.737	2	25582	1278	1283
LEP	K.EGIYENIAK.F	LEP Peptide	1035.52	3.2	518.771	2	27293	1284	1292
LEP	K.E(-18.01)GIYENIAK.F	Pyro-glu from E	1017.51	1.2	509.764	2	22066	1284	1292
trypsin	K.EGIYENIAK.F		1035.52	2.9	518.771	2	19542	1284	1292
LEP	E.GIYENIAK.F	non-specific cleavage	906.481	1.6	454.248	2	19741	1285	1292
LEP	K.PGLC(+57.02)EHDGHPVAC(+57.02).C	Carbamidomethylation, non-specific cleavage	1447.6	0.4	483.54	3	12913	1297	1309
LEP	R.LYVLQVENALLER.G	non-specific cleavage	1558.87	-0.1	780.443	2	53104	1323	1335
LEP	R.LYVLQVENALLERGS.A	non-specific cleavage	1702.93	3.4	852.473	2	53114	1323	1337
LEP	R.LYVLQVENALLERGSA.V	non-specific cleavage	1773.96	2	887.99	2	53325	1323	1338
LEP	R.LYVLQVENALLERGSAVAVPYWDWTEK.A	non-specific cleavage	3148.62	0.5	788.163	4	54665	1323	1349
trypsin	R.LYVLQVENALLER.G		1558.87	-1.2	520.631	3	50576	1323	1335
Glu-C	R.LYVLQVENALLER.G		1558.87	3.4	780.446	2	48385	1323	1335
LEP	Y.VLQVENALLERGS.A	non-specific cleavage	1426.78	-1.2	714.395	2	38087	1325	1337
LEP	Y.VLQVENALLER.G	non-specific cleavage	1282.72	-1.2	642.369	2	38216	1325	1335
LEP	Y.VLQVENALLERGSAVAVPYWDWTEK.A	non-specific cleavage	2872.48	4.6	1437.25	2	53919	1325	1349
trypsin	L.QVENALLER.G	non-specific cleavage	1070.57	0	536.293	2	19917	1327	1335
LEP	E.NALLERGSAVAVPYWDWTEK.A	non-specific cleavage	2304.15	1.8	769.06	3	47658	1330	1349
Glu-C	E.NALLER.G		714.402	0.3	358.209	2	10235	1330	1335
LEP	N.ALLERGSAVAVPYWDWTEK.A	non-specific cleavage	2190.11	2.2	1096.07	2	47094	1331	1349
LEP	A.LLERGSAVAVPYWDWTEK.A	non-specific cleavage	2119.07	3.1	707.367	3	45482	1332	1349
LEP	R.GSAVAVPYWDWTEK.A	non-specific cleavage	1607.76	1.4	804.889	2	47039	1336	1349
trypsin	R.GSAVAVPYWDWTEK.A		1607.76	0.3	536.928	3	45347	1336	1349
LEP	S.AVAVPYWDWTEK.A	non-specific cleavage	1463.71	-0.5	732.861	2	46805	1338	1349
LEP	A.VAVPYWDWTEK.A	non-specific cleavage	1392.67	0.5	697.343	2	45898	1339	1349
LEP	V.AVPYWDWTEK.A	non-specific cleavage	1293.6	2.7	647.811	2	41395	1340	1349
LEP	Y.WDWTEK.A	non-specific cleavage	863.381	-0.1	432.698	2	25851	1344	1349
LEP	K.ADSLPSLIN.D	non-specific cleavage	928.486	2.5	465.252	2	42961	1350	1358
LEP	K.ADSLPSLINDATYFNSRSQ.T	non-specific cleavage	2098	1.4	1050.01	2	49748	1350	1368
LEP	K.ADSLPSLINDATYFNSRS.Q	non-specific cleavage	1969.94	-1.7	985.975	2	50241	1350	1367
LEP	K.ADSLPSLINDATYFNSR.S	non-specific cleavage	1882.91	3.7	942.464	2	50956	1350	1366
LEP	K.ADSLPSLINDATYFNSRSQTFDPNPFFRGH.I	non-specific cleavage	3413.61	0	854.409	4	53769	1350	1379
LEP	K.ADSLPSLINDATYFNSRSQTFDPNPFFRGHIAFEN.A	non-specific cleavage	3987.88	-1.8	1330.3	3	53978	1350	1384
LEP	K.ADSLPSLINDATYFNSRSQTFDPNPFFR.G	non-specific cleavage	3219.53	-0.5	805.888	4	54268	1350	1377
LEP	K.ADSLPSLINDATYFN.S	non-specific cleavage	1639.77	-2	820.892	2	54684	1350	1364
trypsin	K.ADSLPSLINDATYFNSR.S		1882.91	3.1	942.463	2	49157	1350	1366
Glu-C	K.ADSLPSLINDATYFNSR.S		1882.91	2	942.462	2	46421	1350	1366
trypsin	D.SLPSLINDATYFNSR.S	non-specific cleavage	1696.84	0.7	849.429	2	46024	1352	1366
Glu-C	D.SLPSLINDATYFNSR.S		1696.84	-1.2	849.427	2	44177	1352	1366
trypsin	L.PSLINDATYFNSR.S	non-specific cleavage	1496.73	-2.5	749.368	2	49034	1354	1366
LEP	S.LINDATYFNSR.S	non-specific cleavage	1312.64	-2.3	657.326	2	28140	1356	1366
trypsin	N.DATYFNSR.S	non-specific cleavage	972.43	-1	487.222	2	13915	1359	1366
Glu-C	D.ATYFNSR.S		857.403	-0.2	429.709	2	9067	1360	1366
LEP	N.SRSQTFDPNPFFRGHIAFENAVTSRDPQPELWDNK.D	non-specific cleavage	4102.97	2.6	821.603	5	43605	1365	1399
LEP	R.SQTFDPNPFFRGHIAFENAVTSRD.P	non-specific cleavage	2752.3	0.4	689.082	4	44321	1367	1390
LEP	R.SQTFDPNPFFRGHIAFEN.A	non-specific cleavage	2122.99	-1.2	708.668	3	45889	1367	1384
LEP	R.SQTFDPNPFFRGHIAFENAVTSRDPQPELWDNK.D	non-specific cleavage	3859.83	-0.5	965.965	4	46741	1367	1399
LEP	R.SQTFDPNPFFRGHIAF.E	non-specific cleavage	1879.9	0.5	627.641	3	49059	1367	1382
trypsin	R.SQTFDPNPFFR.G		1354.63	2.1	678.324	2	41294	1367	1377
Glu-C	R.SQTFDPNPFFR.G		1354.63	0.5	678.323	2	39471	1367	1377
trypsin	Q.TFDPNPFFR.G	non-specific cleavage	1139.54	1.2	570.778	2	40953	1369	1377
LEP	Q.TFDPNPFFR.G	non-specific cleavage	1139.54	2.3	570.779	2	42762	1369	1377
LEP	Q.TFDPNPFFRGHIAFENAVTSRDPQPELWDNK.D	non-specific cleavage	3644.74	1.2	729.957	5	47012	1369	1399
LEP	D.PNPFFRGHIAFENAVTSRDPQPELWDNK.D	non-specific cleavage	3281.6	-1.2	657.327	5	41288	1372	1399
LEP	F.FRGHIAFENAVTSRDPQPELWDNK.D	non-specific cleavage	2826.38	0.1	707.603	4	32800	1376	1399
trypsin	R.GHIAFEN(-17.03)AVTSR.D	Ammonia-loss (N)	1283.63	4	428.884	3	17915	1378	1389
LEP	R.GHIAFEN.A	non-specific cleavage	786.366	-2.4	394.189	2	15414	1378	1384
LEP	R.GHIAFENAVTSRD.P	non-specific cleavage	1415.68	1.2	472.901	3	21174	1378	1390
trypsin	R.GHIAFENAVTSR.D		1300.65	1	434.558	3	18204	1378	1389
Glu-C	R.GHIAFENAVTSR.D		1300.65	0.3	651.334	2	17238	1378	1389
trypsin	G.HIAFENAVTSR.D	non-specific cleavage	1243.63	-0.4	622.822	2	18042	1379	1389
trypsin	H.IAFENAVTSR.D	non-specific cleavage	1106.57	2.3	554.295	2	23464	1380	1389
LEP	H.IAFENAVTSRDPQPELWDNK.D	non-specific cleavage	2329.13	1.3	1165.58	2	38359	1380	1399
LEP	A.FENAVTSRDPQPELWDNK.D	non-specific cleavage	2145.01	0.7	716.012	3	29966	1382	1399
LEP	F.ENAVTSRDPQPELWDNK.D	non-specific cleavage	1997.94	2.2	999.982	2	25325	1383	1399
trypsin	E.NAVTSR.D	non-specific cleavage	646.34	0.7	324.177	2	17924	1384	1389
LEP	N.AVTSRDPQPELWDNK.D	non-specific cleavage	1754.86	1.2	878.438	2	23182	1385	1399
LEP	V.TSRDPQPELWDNK.D	non-specific cleavage	1584.75	1.4	793.385	2	23239	1387	1399
LEP	T.SRDPQPELWDNK.D	non-specific cleavage	1483.71	1.8	742.861	2	20741	1388	1399
LEP	S.RDPQPELWDNK.D	non-specific cleavage	1396.67	-1.2	466.565	3	20965	1389	1399
trypsin	R.DPQPELWDNK.D		1240.57	1	621.294	2	26465	1390	1399
LEP	D.PQPELWDNK.D	non-specific cleavage	1125.55	-2.6	563.779	2	24961	1391	1399
LEP	Q.PELWDNK.D	non-specific cleavage	900.434	-0.2	451.224	2	23250	1393	1399
LEP	K.DFYENVMLALEQDNFC(+57.02)DFEIQLELIHNALHSRLGGRAK.Y	LEP Peptide, Carbamidomethylation	4505.19	1.3	751.873	6	55141	1400	1437
LEP	K.DFYENVM(+15.99)LALEQDNFC(+57.02)DFEIQLELIHNALHSRLGGRAK.Y	Oxidation (M); Carbamidomethylation	4521.18	-0.5	754.538	6	54685	1400	1437
trypsin	M.LALEQDNFC(+57.02)DFEIQLELIHNALHSR.L	Carbamidomethylation, non-specific cleavage	3024.48	-1.6	757.125	4	50940	1407	1431
LEP	A.LEQDNFC(+57.02)DFEIQLELIHNALHSRLGGRAK.Y	Carbamidomethylation, non-specific cleavage	3422.72	-0.4	685.55	5	52324	1409	1437
LEP	L.ELIHNALHSRLGGRAK.Y	non-specific cleavage	1771	0.9	443.757	4	13650	1422	1437
Glu-C	E.LIHNALHSR.L		1059.59	1.2	354.206	3	3848	1423	1431
Glu-C	I.HNALHSR.L	non-specific cleavage	833.426	-0.1	417.72	2	3662	1425	1431
LEP	H.NALHSRLGGRAK.Y	non-specific cleavage	1278.73	-1.7	427.249	3	2411	1426	1437
LEP	N.ALHSRLGGRAK.Y	non-specific cleavage	1164.68	-0.6	389.235	3	2298	1427	1437
Glu-C	K.YSLSSLDYTAFDPVFFLHH.A	non-specific cleavage	2258.07	1.9	753.698	3	49937	1438	1456
Glu-C	K.YSLSSLDYTAFDPVFFLH.H	non-specific cleavage	2121.01	0	1061.51	2	50556	1438	1455
trypsin	K.YSLSSLDYTAFDPVFFLHH.A	non-specific cleavage	2258.07	0.6	753.697	3	51578	1438	1456
LEP	K.YSLSSLDYTAFDPVFFLHHA.N	non-specific cleavage	2329.11	3.3	777.378	3	54810	1438	1457
LEP	K.YSLSSLDYTAFDPVFFLHH.A	non-specific cleavage	2258.07	-0.3	753.697	3	54904	1438	1456
LEP	K.YSLSSLDYTAFDPVFFLH.H	non-specific cleavage	2121.01	4.2	1061.52	2	55634	1438	1455
trypsin	K.YSLSSLDYTAFDPVFFLHHANVDR.I		2813.34	0.8	1407.68	2	50801	1438	1461
Glu-C	Y.SLSSLDYTAFDPVFFLHHANVDR.I	non-specific cleavage	2650.28	1.9	884.436	3	49010	1439	1461
Glu-C	Y.SLSSLDYTAFDPVFFLH.H	non-specific cleavage	1957.95	1.2	979.982	2	50471	1439	1455
trypsin	Y.SLSSLDYTAFDPVFFLHHANVDR.I	non-specific cleavage	2650.28	0.3	663.578	4	50619	1439	1461
trypsin	Y.SLSSLDYTAFDPVFFLH.H	non-specific cleavage	1957.95	2.8	979.983	2	52191	1439	1455
trypsin	S.LSSLDYTAFDPVFFLHHANVDR.I	non-specific cleavage	2563.25	-0.6	641.819	4	50554	1440	1461
trypsin	L.SSLDYTAFDPVFFLHHANVDR.I	non-specific cleavage	2450.17	1.1	613.549	4	50345	1441	1461
trypsin	L.SSLDYTAFDPVFFLH.H	non-specific cleavage	1757.83	2.9	879.925	2	52033	1441	1455
Glu-C	S.SLDYTAFDPVFFLHH.A	non-specific cleavage	1807.86	0.6	603.627	3	49608	1442	1456
trypsin	S.SLDYTAFDPVFFLHHANVDR.I	non-specific cleavage	2363.13	0.6	591.791	4	50406	1442	1461
trypsin	S.SLDYTAFDPVFFLHH.A	non-specific cleavage	1807.86	-0.1	603.626	3	51267	1442	1456
trypsin	S.SLDYTAFDPVFFLH.H	non-specific cleavage	1670.8	1.4	836.408	2	52072	1442	1455
LEP	S.SLDYTAFDPVFFLHH.A	non-specific cleavage	1807.86	1	603.627	3	54585	1442	1456
LEP	S.SLDYTAFDPVFFLH.H	non-specific cleavage	1670.8	2.2	836.408	2	55391	1442	1455
trypsin	L.DYTAFDPVFFLHHANVDR.I	non-specific cleavage	2163.02	0.1	541.762	4	49886	1444	1461
trypsin	D.YTAFDPVFFLHHANVDR.I	non-specific cleavage	2047.99	2.4	513.006	4	45833	1445	1461
Glu-C	D.YTAFDPVFFLHHANVDR.I		2047.99	-0.6	683.67	3	43927	1445	1461
trypsin	Y.TAFDPVFFLHHANVDR.I	non-specific cleavage	1884.93	-1.2	472.238	4	43287	1446	1461
trypsin	A.FDPVFFLHHANVDR.I	non-specific cleavage	1712.84	2.7	571.956	3	41120	1448	1461
trypsin	F.DPVFFLHHANVDR.I	non-specific cleavage	1565.77	0.4	783.894	2	50813	1449	1461
trypsin	D.PVFFLHHANVDR.I	non-specific cleavage	1450.75	1.3	726.382	2	50435	1450	1461
Glu-C	D.PVFFLHHANVDR.I		1450.75	-2.6	363.693	4	20656	1450	1461
LEP	H.HANVDRIWAIWQDLQR.Y	non-specific cleavage	2020.04	-0.9	674.353	3	49933	1456	1471
trypsin	A.IWQDLQR.Y	non-specific cleavage	957.503	0.1	479.759	2	19913	1465	1471
trypsin	R.KKPYNEADC(+57.02)AVNEMR.K	Carbamidomethylation, non-specific cleavage	1823.83	1	608.951	3	10793	1474	1488
LEP	K.KPYN(-17.03)EADC(+57.02)AVNEMRK.P	Ammonia-loss (N); Carbamidomethylation	1806.8	2.5	452.709	4	13747	1475	1489
trypsin	K.KPYNEADC(+57.02)AVNEMR.K	Carbamidomethylation	1695.73	0.1	848.875	2	13473	1475	1488
LEP	K.KPYNEADC(+57.02)AVNEMRK.P	Carbamidomethylation, non-specific cleavage	1823.83	0.3	608.951	3	10007	1475	1489
LEP	K.KPYNEADC(+57.02)AVNEM(+15.99)RK.P	Carbamidomethylation; Oxidation (M)	1839.82	0	614.282	3	6254	1475	1489
LEP	K.PYN(-17.03)EADC(+57.02)AVNEMRK.P	Ammonia-loss (N); Carbamidomethylation	1678.71	6.3	560.58	3	17250	1476	1489
trypsin	K.PYNEADC(+57.02)AVNEMR.K	Carbamidomethylation	1567.64	0.2	784.827	2	18345	1476	1488
LEP	K.PYNEADC(+57.02)AVNEM(+15.99)RK.P	Carbamidomethylation; Oxidation (M)	1711.73	0.7	571.584	3	17226	1476	1489
LEP	K.PYNEADC(+57.02)AVNEMRK.P	LEP Peptide, Carbamidomethylation	1695.73	0.2	848.875	2	17218	1476	1489
LEP	P.YNEADC(+57.02)AVNEMRK.P	Carbamidomethylation, non-specific cleavage	1598.68	-1	800.347	2	17256	1477	1489
LEP	Y.NEADC(+57.02)AVNEMRK.P	Carbamidomethylation, non-specific cleavage	1435.62	-0.3	718.816	2	17275	1478	1489
LEP	N.EADC(+57.02)AVNEMRK.P	Carbamidomethylation, non-specific cleavage	1321.58	1.4	441.533	3	8187	1479	1489
LEP	E.ADC(+57.02)AVNEMRK.P	Carbamidomethylation, non-specific cleavage	1192.53	0	398.518	3	13716	1480	1489
LEP	D.C(+57.02)AVNEMRK.P	Carbamidomethylation, non-specific cleavage	1006.47	0.2	504.242	2	13696	1482	1489
LEP	C.AVNEMRK.P	non-specific cleavage	846.438	0.1	424.226	2	13728	1483	1489
trypsin	R.KPLQPFNNPELNSDSMTLK.H		2172.09	2.1	725.038	3	33498	1489	1507
LEP	K.PLQPFNNPELNSDSMTLK.H	LEP Peptide	2043.99	3	1023.01	2	42641	1490	1507
LEP	K.PLQPFNNPELNSDSM(+15.99)TLK.H	Oxidation (M)	2059.99	4.6	687.673	3	36917	1490	1507
LEP	F.NNPELNSDSMTLK.H	non-specific cleavage	1461.68	1.2	731.847	2	23977	1495	1507
LEP	F.NNPELNSDSM(+15.99)TLK.H	Oxidation (M)	1477.67	-0.3	739.843	2	16014	1495	1507
LEP	N.NPELNSDSMTLK.H	non-specific cleavage	1347.63	3.4	674.827	2	24570	1496	1507
LEP	N.PELNSDSMTLK.H	non-specific cleavage	1233.59	-4.2	617.8	2	42567	1497	1507
trypsin	K.HNLPQDS(-18.01)FDYQNR.F	Dehydration	1614.72	0.5	539.247	3	17405	1508	1520
LEP	K.HNLPQDSFDYQNRFRYQYDNLQFNHFSIQK.L	LEP Peptide	3861.8	-1.1	644.64	6	39827	1508	1537
LEP	K.HNLPQDSFDYQNR.F	non-specific cleavage	1632.73	-1	817.37	2	19788	1508	1520
trypsin	K.HNLPQDSFDYQNR.F		1632.73	1.7	545.251	3	17233	1508	1520
Glu-C	K.HNLPQDSFDYQNR.F		1632.73	0.5	545.25	3	16553	1508	1520
Glu-C	H.NLPQDSFDYQNR.F	non-specific cleavage	1495.67	1.5	748.843	2	21918	1509	1520
trypsin	H.NLPQDSFDYQNR.F	non-specific cleavage	1495.67	1.7	748.843	2	23368	1509	1520
LEP	H.NLPQDSFDYQNRFRYQYDNLQFNHFSIQK.L	non-specific cleavage	3724.74	2.6	745.958	5	42867	1509	1537
trypsin	N.LPQDSFDYQNR.F	non-specific cleavage	1381.63	1.3	691.821	2	21208	1510	1520
trypsin	L.PQDSFDYQNR.F	non-specific cleavage	1268.54	0.1	635.278	2	23122	1511	1520
trypsin	S.FDYQNR.F	non-specific cleavage	841.372	-0.3	421.693	2	17348	1515	1520
LEP	R.FRYQYDNLQFNHFSIQK.L	non-specific cleavage	2247.09	-1.4	562.778	4	36426	1521	1537
Glu-C	R.YQYDNLQFNHF.S	non-specific cleavage	1487.65	1.5	744.832	2	36726	1523	1533
LEP	R.YQYDNLQFNHFSIQK.L	non-specific cleavage	1943.92	2.9	648.981	3	36753	1523	1537
trypsin	R.YQYDNLQFNHF.S	non-specific cleavage	1487.65	-1.2	744.83	2	38679	1523	1533
trypsin	R.YQYDNLQFNHFSIQK.L		1943.92	-3	648.977	3	35511	1523	1537
Glu-C	R.YQYDNLQFNHFSIQK.L		1943.92	-3.2	972.962	2	33389	1523	1537
trypsin	Q.YDNLQFNHFSIQK.L	non-specific cleavage	1652.79	-0.7	827.404	2	35078	1525	1537
LEP	Y.DNLQFNHFSIQK.L	non-specific cleavage	1489.73	0.7	497.585	3	32143	1526	1537
Glu-C	D.NLQFNHFSIQK.L		1374.7	0.4	688.36	2	26712	1527	1537
LEP	F.NHFSIQK.L	non-specific cleavage	872.45	1.7	437.233	2	8158	1531	1537
LEP	N.HFSIQK.L	non-specific cleavage	758.408	0.4	380.211	2	8039	1532	1537
LEP	H.FSIQK.L	non-specific cleavage	621.349	-1.2	311.681	2	13815	1533	1537
LEP	K.LDQTIQARK.Q	LEP Peptide	1071.6	-0.8	358.208	3	6272	1538	1546
LEP	K.LDQTIQAR.K	non-specific cleavage	943.509	0.2	472.762	2	11140	1538	1545
trypsin	K.LDQTIQAR.K		943.509	0.2	472.762	2	8948	1538	1545
Glu-C	K.LDQTIQAR.K		943.509	1.2	472.762	2	8171	1538	1545
LEP	D.QTIQARK.Q	non-specific cleavage	843.493	-3.7	422.752	2	6322	1540	1546
LEP	H.NIGTSAVVDIYIC(+57.02)VEQGGEQNC(+57.02)K.T	Carbamidomethylation, non-specific cleavage	2553.18	0.4	852.069	3	50703	1559	1581
Glu-C	D.IYIC(+57.02)VEQGGEQNC(+57.02)K.T	Carbamidomethylation	1696.75	1.4	849.386	2	21995	1568	1581
LEP	K.TKAGSFTILGGETEMPFHFDRLYK.F	LEP Peptide	2744.36	2.1	687.1	4	47093	1582	1605
LEP	K.AGS(-18.01)FTILGGETEMPFHFDRLYK.F	Dehydration	2497.21	-9.6	625.304	4	51518	1584	1605
LEP	K.AGSFTILGGETEMPFHFDRLYK.F	LEP Peptide	2515.22	1.7	1258.62	2	51341	1584	1605
LEP	K.AGSFTILGGETEMPFHFDR.L	non-specific cleavage	2110.98	2.2	1056.5	2	51641	1584	1602
LEP	K.AGSFTILGGETEMPFHFDRLY.K	non-specific cleavage	2387.13	-0.1	796.716	3	54251	1584	1604
LEP	K.AGSFTILGGETEMPFHFD.R	non-specific cleavage	1954.88	0.2	978.446	2	54651	1584	1601
LEP	K.AGSFTILGGETEM(+15.99)PFHFDRLYK.F	Oxidation (M)	2531.22	2.9	1266.62	2	46709	1584	1605
trypsin	K.AGSFTILGGETEM(+15.99)PFHFDR.L	Oxidation (M)	2126.97	2.1	1064.5	2	44351	1584	1602
LEP	K.AGSFTILGGETEM(+15.99)PFHFDR.L	Oxidation (M), non-specific cleavage	2126.97	5.6	1064.5	2	46069	1584	1602
LEP	K.AGSFTILGGETEM(+15.99)PFHFDR.L	Oxidation (M), non-specific cleavage	2126.97	5.6	1064.5	2	46069	1584	1602
trypsin	K.AGSFTILGGETEMPFHFDR.L		2110.98	2.2	704.668	3	50005	1584	1602
trypsin	K.AGSFTILGGETEMPFHFDRLYK.F		2515.22	-1.6	839.413	3	49981	1584	1605
LEP	A.GSFTILGGETEMPFHFDRLYK.F	non-specific cleavage	2444.18	-1.4	815.734	3	51339	1585	1605
LEP	G.SFTILGGETEMPFHFDRLYK.F	non-specific cleavage	2387.16	-0.1	796.728	3	51508	1586	1605
LEP	G.SFTILGGETEM(+15.99)PFHFDRLYK.F	Oxidation (M), non-specific cleavage	2403.16	-3.5	601.794	4	46808	1586	1605
LEP	G.SFTILGGETEM(+15.99)PFHFDRLYK.F	Oxidation (M), non-specific cleavage	2403.16	-3.5	601.794	4	46808	1586	1605
Glu-C	F.TILGGETEMPFHFDR.L	non-specific cleavage	1748.82	-1	583.946	3	40245	1588	1602
trypsin	F.TILGGETEMPFHFDR.L	non-specific cleavage	1748.82	1.9	583.948	3	42000	1588	1602
LEP	T.ILGGETEMPFHFDRLYK.F	non-specific cleavage	2052.01	-1	685.011	3	51403	1589	1605
LEP	T.ILGGETEM(+15.99)PFHFDRLYK.F	Oxidation (M), non-specific cleavage	2068.01	-1.2	518.009	4	37359	1589	1605
LEP	T.ILGGETEM(+15.99)PFHFDRLYK.F	Oxidation (M), non-specific cleavage	2068.01	-1.2	518.009	4	37359	1589	1605
LEP	I.LGGETEMPFHFDRLYK.F	non-specific cleavage	1938.93	-6.8	647.313	3	51388	1590	1605
LEP	I.LGGETEM(+15.99)PFHFDRLYK.F	Oxidation (M), non-specific cleavage	1954.92	-5.2	978.465	2	46729	1590	1605
LEP	I.LGGETEM(+15.99)PFHFDRLYK.F	Oxidation (M), non-specific cleavage	1954.92	-5.2	978.465	2	46729	1590	1605
LEP	L.GGETEMPFHFDRLYK.F	non-specific cleavage	1825.85	0.5	913.931	2	51421	1591	1605
LEP	L.GGETEM(+15.99)PFHFDRLYK.F	Oxidation (M), non-specific cleavage	1841.84	-1.3	614.953	3	46750	1591	1605
LEP	L.GGETEM(+15.99)PFHFDRLYK.F	Oxidation (M), non-specific cleavage	1841.84	-1.3	614.953	3	46750	1591	1605
LEP	E.TEMPFHFDRLYK.F	non-specific cleavage	1582.76	0.9	528.595	3	37260	1594	1605
LEP	T.EMPFHFDRLYK.F	non-specific cleavage	1481.71	-1.3	494.911	3	36137	1595	1605
LEP	E.MPFHFDRLYK.F	non-specific cleavage	1352.67	-4.8	677.339	2	51406	1596	1605
LEP	K.FD(-18.01)ITSALHK.L	Dehydration	1012.53	2.3	507.276	2	41119	1606	1614
LEP	K.FDIT(-18.01)SALHK.L	Dehydration	1012.53	1.2	507.275	2	31016	1606	1614
LEP	K.FDITSALHK.L	LEP Peptide	1030.54	0.9	516.28	2	31517	1606	1614
LEP	F.DITSALHK.L	non-specific cleavage	883.476	2.1	442.746	2	30956	1607	1614
LEP	D.ITSALHK.L	non-specific cleavage	768.449	1.9	385.233	2	30959	1608	1614
LEP	I.TSALHK.L	non-specific cleavage	655.365	0.4	328.69	2	30976	1609	1614
LEP	H.KLGVPLDGHGFDIK.V	non-specific cleavage	1494.82	1.8	499.281	3	33090	1614	1627
LEP	K.LGVPLD(-18.01)GHGFDIK.V	Dehydration	1348.71	-0.7	675.364	2	38497	1615	1627
LEP	K.LGVPLDGHGFDIK.V	LEP Peptide	1366.72	1.9	684.371	2	39120	1615	1627
trypsin	K.LGVPLDGHGFDIK.V		1366.72	3.6	684.372	2	37040	1615	1627
LEP	L.GVPLDGHGFDIK.V	non-specific cleavage	1253.64	1.4	627.828	2	38795	1616	1627
LEP	G.VPLDGHGFDIK.V	non-specific cleavage	1196.62	1.9	599.318	2	38855	1617	1627
LEP	V.PLDGHGFDIK.V	non-specific cleavage	1097.55	2.1	549.784	2	38793	1618	1627
LEP	P.LDGHGFDIK.V	non-specific cleavage	1000.5	-1.3	501.255	2	38853	1619	1627
LEP	L.DGHGFDIK.V	non-specific cleavage	887.414	-1.5	444.714	2	38955	1620	1627
LEP	D.GHGFDIK.V	non-specific cleavage	772.387	-1.2	387.2	2	38917	1621	1627
LEP	Y.DGLSQHNLVRK.E	non-specific cleavage	1265.68	0.3	633.849	2	7791	1661	1671
trypsin	Y.DGLSQHNLVR.K	non-specific cleavage	1137.59	2.2	569.803	2	13182	1661	1670
LEP	L.SQHNLVRK.E	non-specific cleavage	980.552	-1.2	491.282	2	7795	1664	1671
LEP	K.EVSSLTTLEK.H	LEP Peptide	1105.59	2.7	553.802	2	24167	1672	1681
LEP	K.E(-18.01)VSSLTTLEK.H	Pyro-glu from E	1087.58	2	544.796	2	23613	1672	1681
Glu-C	K.EVSSLTTLE.K		977.492	-0.3	489.753	2	29236	1672	1680
LEP	E.VSSLTTLEK.H	non-specific cleavage	976.544	1.6	489.28	2	23666	1673	1681
LEP	V.SSLTTLEK.H	non-specific cleavage	877.476	0.7	439.745	2	23647	1674	1681
LEP	S.SLTTLEK.H	non-specific cleavage	790.444	0.7	396.229	2	14835	1675	1681
trypsin	K.NMQADDSPDGYQAIASFHALPPLC(+57.02)PSPSAAHR.H	Carbamidomethylation	3420.56	-6.4	856.142	4	43731	1690	1721
LEP	K.NMQADDSPDGYQAIAS.F	non-specific cleavage	1681.69	-1.1	841.851	2	28280	1690	1705
trypsin	K.NMQADDSPDGYQAIASFH.A	non-specific cleavage	1965.82	1	983.916	2	34893	1690	1707
LEP	K.NMQADDSPDGYQAIASFH.A	non-specific cleavage	1965.82	1.7	983.917	2	36414	1690	1707
LEP	K.NM(+15.99)QADDSPDGYQAIA.S	Oxidation (M), non-specific cleavage	1610.65	3.2	806.336	2	26344	1690	1704
LEP	K.NM(+15.99)QADDSPDGYQAIASFH.A	Oxidation (M), non-specific cleavage	1981.81	-4.3	991.909	2	34124	1690	1707
LEP	K.NM(+15.99)QADDSPDGYQAIA.S	Oxidation (M), non-specific cleavage	1610.65	3.2	806.336	2	26344	1690	1704
LEP	K.NM(+15.99)QADDSPDGYQAIASFH.A	Oxidation (M), non-specific cleavage	1981.81	-4.3	991.909	2	34124	1690	1707
trypsin	K.NM(+15.99)QADDSPDGYQAIASFH.A	Oxidation (M), non-specific cleavage	1981.81	0.4	991.913	2	32216	1690	1707
trypsin	K.NM(+15.99)QADDSPDGYQAIASFH.A	Oxidation (M), non-specific cleavage	1981.81	0.4	991.913	2	32216	1690	1707
trypsin	K.NM(+15.99)QADDSPDGYQAIASFHALPPLC(+57.02)PSPSAAHR.H	Oxidation (M); Carbamidomethylation, non-specific cleavage	3436.56	0.3	860.147	4	42836	1690	1721
trypsin	K.NM(+15.99)QADDSPDGYQAIASFHALPPLC(+57.02)PSPSAAHR.H	Oxidation (M); Carbamidomethylation, non-specific cleavage	3436.56	0.3	860.147	4	42836	1690	1721
trypsin	N.MQADDSPDGYQAIASFHALPPLC(+57.02)PSPSAAHR.H	Carbamidomethylation, non-specific cleavage	3306.52	-1	827.636	4	43800	1691	1721
LEP	M.QADDSPDGYQAIASFH.A	non-specific cleavage	1720.73	-0.4	861.373	2	34565	1692	1707
LEP	D.SPDGYQAIASFH.A	non-specific cleavage	1291.58	4.2	646.802	2	32344	1696	1707
trypsin	Y.QAIASFHALPPLC(+57.02)PSPSAAHR.H	Carbamidomethylation, non-specific cleavage	2227.13	-0.7	557.79	4	34032	1701	1721
LEP	A.IASFHALPPLC(+57.02)PSPSAAHRHAC(+57.02).C	Carbamidomethylation, non-specific cleavage	2396.16	1.4	799.729	3	28368	1703	1724
LEP	A.IASFHALPPLC(+57.02)PSPSAAHRH.A	Carbamidomethylation, non-specific cleavage	2165.1	2.5	542.282	4	28881	1703	1722
trypsin	A.IASFHALPPLC(+57.02)PSPSAAHR.H	Carbamidomethylation, non-specific cleavage	2028.04	2.3	508.017	4	31350	1703	1721
LEP	A.IASFHALPPLC(+57.02)PSPSAAHR.H	Carbamidomethylation, non-specific cleavage	2028.04	2.2	508.017	4	33332	1703	1721
LEP	A.SFHALPPLC(+57.02)PSPSAAHRHAC(+57.02).C	Carbamidomethylation, non-specific cleavage	2212.04	0.6	554.018	4	23166	1705	1724
LEP	A.SFHALPPLC(+57.02)PSPSAAHRH.A	Carbamidomethylation, non-specific cleavage	1980.97	0.4	496.251	4	23504	1705	1722
LEP	A.SFHALPPLC(+57.02)PSPSAAHR.H	Carbamidomethylation, non-specific cleavage	1843.92	-0.2	461.986	4	27810	1705	1721
LEP	S.FHALPPLC(+57.02)PSPSAAHRHAC(+57.02).C	Carbamidomethylation, non-specific cleavage	2125.01	0.7	532.26	4	22051	1706	1724
Glu-C	S.FHALPPLC(+57.02)PSPSAAHR.H	Carbamidomethylation, non-specific cleavage	1756.88	-0.6	586.635	3	23368	1706	1721
trypsin	S.FHALPPLC(+57.02)PSPSAAHR.H	Carbamidomethylation, non-specific cleavage	1756.88	0.7	440.228	4	24490	1706	1721
LEP	F.HALPPLC(+57.02)PSPSAAHRHAC(+57.02).C	Carbamidomethylation, non-specific cleavage	1977.94	1.8	495.493	4	15548	1707	1724
Glu-C	F.HALPPLC(+57.02)PSPSAAHR.H	Carbamidomethylation, non-specific cleavage	1609.81	0.1	403.461	4	16194	1707	1721
trypsin	F.HALPPLC(+57.02)PSPSAAHR.H	Carbamidomethylation, non-specific cleavage	1609.81	-1.5	537.611	3	16422	1707	1721
LEP	H.ALPPLC(+57.02)PSPSAAHRHAC(+57.02).C	Carbamidomethylation, non-specific cleavage	1840.88	2.3	461.229	4	19560	1708	1724
LEP	H.ALPPLC(+57.02)PSPSAAHRH.A	Carbamidomethylation, non-specific cleavage	1609.81	0.2	403.461	4	19901	1708	1722
Glu-C	H.ALPPLC(+57.02)PSPSAAHR.H	Carbamidomethylation, non-specific cleavage	1472.76	0.7	491.926	3	21934	1708	1721
trypsin	H.ALPPLC(+57.02)PSPSAAHR.H	Carbamidomethylation, non-specific cleavage	1472.76	0.8	491.926	3	22483	1708	1721
LEP	L.PPLC(+57.02)PSPSAAHRHAC(+57.02).C	Carbamidomethylation, non-specific cleavage	1656.76	1	553.262	3	19608	1710	1724
Glu-C	L.PPLC(+57.02)PSPSAAHR.H	Carbamidomethylation, non-specific cleavage	1288.63	-1	430.552	3	21392	1710	1721
LEP	L.PPLC(+57.02)PSPSAAHR.H	Carbamidomethylation, non-specific cleavage	1288.63	5.9	645.328	2	24802	1710	1721
Glu-C	P.PLC(+57.02)PSPSAAHR.H	Carbamidomethylation, non-specific cleavage	1191.58	-0.2	596.798	2	21480	1711	1721
trypsin	P.PLC(+57.02)PSPSAAHR.H	Carbamidomethylation, non-specific cleavage	1191.58	1.1	596.799	2	25817	1711	1721
LEP	C.PSPSAAHRHAC(+57.02).C	Carbamidomethylation, non-specific cleavage	1189.54	1	397.521	3	19645	1714	1724
LEP	C.PSPSAAHRH.A	non-specific cleavage	958.473	0.9	480.244	2	19994	1714	1722
trypsin	C.PSPSAAHR.H	non-specific cleavage	821.414	-1.1	411.714	2	25752	1714	1721
LEP	M.ATFPQWHRLYTVQFEDSLK.R	non-specific cleavage	2365.19	3	592.305	4	42389	1730	1748
LEP	H.RLYTVQFEDSLK.R	non-specific cleavage	1497.78	1.2	749.899	2	31715	1737	1748
LEP	R.LYTVQFEDSLK.R	non-specific cleavage	1341.68	-0.1	671.848	2	39916	1738	1748
trypsin	R.LYTVQFEDSLK.R		1341.68	-1.2	671.847	2	37912	1738	1748
Glu-C	R.LYTVQFEDSLK.R		1341.68	2.4	671.85	2	34595	1738	1748
trypsin	Y.TVQFEDSLK.R	non-specific cleavage	1065.53	0.4	533.775	2	22495	1740	1748
LEP	Y.TVQFEDSLK.R	non-specific cleavage	1065.53	2.8	533.776	2	22822	1740	1748
LEP	V.QFEDSLK.R	non-specific cleavage	865.418	-0.6	433.716	2	16026	1742	1748
LEP	Q.FEDSLK.R	non-specific cleavage	737.36	1.5	369.688	2	13462	1743	1748
LEP	K.RHGSIVGLPYWDWLK.P		1825.96	1.5	457.499	4	48168	1749	1763
trypsin	R.HGSIVGLPYWDWLK.P		1669.86	3.6	835.941	2	50638	1750	1763
Glu-C	R.HGSIVGLPYWDWLK.P		1669.86	1	835.939	2	48874	1750	1763
trypsin	H.GSIVGLPYWDWLK.P	non-specific cleavage	1532.8	1.2	767.409	2	51582	1751	1763
LEP	H.GSIVGLPYWDWLK.P	non-specific cleavage	1532.8	0.5	767.409	2	54892	1751	1763
LEP	G.SIVGLPYWDWLK.P	non-specific cleavage	1475.78	0	738.898	2	54921	1752	1763
Glu-C	S.IVGLPYWDWLK.P	non-specific cleavage	1388.75	-5.1	695.378	2	49892	1753	1763
LEP	S.IVGLPYWDWLK.P	non-specific cleavage	1388.75	0.2	695.382	2	54872	1753	1763
trypsin	V.GLPYWDWLK.P	non-specific cleavage	1176.6	3.4	589.308	2	50671	1755	1763
LEP	V.GLPYWDWLK.P	non-specific cleavage	1176.6	1	589.306	2	53793	1755	1763
trypsin	G.LPYWDWLK.P	non-specific cleavage	1119.58	-2.7	560.793	2	50659	1756	1763
LEP	L.PYWDWLK.P	non-specific cleavage	1006.49	-0.6	504.253	2	48035	1757	1763
Glu-C	K.PQSALPDLVT(-18.01)QE.T	Dehydration	1278.65	0.9	640.331	2	38367	1764	1775
trypsin	K.PQSALPDLVTQETYEH.L	non-specific cleavage	1826.87	0.8	609.964	3	37872	1764	1779
LEP	K.PQSALPDLVTQETYEH.L	non-specific cleavage	1826.87	1.7	914.443	2	39672	1764	1779
LEP	K.PQSALPDLVTQE.T	non-specific cleavage	1296.66	0.1	649.335	2	42020	1764	1775
LEP	K.PQSALPDLVTQETYEHLFS.H	non-specific cleavage	2174.05	0.6	725.692	3	54265	1764	1782
LEP	K.PQSALPDLVTQETYEHLF.S	non-specific cleavage	2087.02	1.8	1044.52	2	54331	1764	1781
trypsin	K.PQSALPDLVTQETYEHLFSHK.T		2439.21	2.1	814.078	3	46060	1764	1784
Glu-C	K.PQSALPDLVTQE.T		1296.66	-0.9	649.335	2	38800	1764	1775
Glu-C	K.PQSALPDLVTQETYE.H		1689.81	0	845.912	2	42053	1764	1778
LEP	K.PQSALPDLVTQETYEHLFSHK.T		2439.21	2.6	610.811	4	47640	1764	1784
trypsin	S.ALPDLVTQETYEH.L	non-specific cleavage	1514.73	-2.1	758.368	2	35153	1767	1779
LEP	S.ALPDLVTQETYEH.L	non-specific cleavage	1514.73	1.6	758.371	2	37223	1767	1779
LEP	S.ALPDLVTQETYEHLFSHK.T	non-specific cleavage	2127.06	1.6	532.774	4	46272	1767	1784
LEP	L.PDLVTQETYEHLFSHK.T	non-specific cleavage	1942.94	-0.8	648.654	3	46319	1769	1784
LEP	L.VTQETYEHLFSHK.T	non-specific cleavage	1617.78	-0.5	809.896	2	47749	1772	1784
LEP	V.TQETYEHLFSHK.T	non-specific cleavage	1518.71	-2.6	760.361	2	49605	1773	1784
LEP	H.LFSHK.T	non-specific cleavage	630.349	-1.5	316.181	2	2916	1780	1784
Glu-C	K.TFPNPFLK.A		962.523	-0.3	482.268	2	38122	1785	1792
LEP	K.TFPNPFLK.A		962.523	-0.3	482.268	2	41994	1785	1792
LEP	T.FPNPFLK.A	non-specific cleavage	861.475	-1.1	431.744	2	41607	1786	1792
LEP	F.PNPFLK.A	non-specific cleavage	714.406	0.7	358.211	2	41569	1787	1792
LEP	K.ANIEFEGEGVTTER.D	non-specific cleavage	1550.72	2.4	776.37	2	27058	1793	1806
trypsin	K.ANIEFEGEGVTTER.D		1550.72	-1.8	776.366	2	25672	1793	1806
trypsin	K.ANIEFEGEGVTTERDVDAEHLFAK.G		2676.27	1.4	893.097	3	35445	1793	1816
Glu-C	K.ANIEFEGEGVTTER.D		1550.72	-2.1	776.366	2	23566	1793	1806
LEP	K.ANIEFEGEGVTTERDVDAEHLFAK.G		2676.27	0	670.074	4	38907	1793	1816
trypsin	A.NIEFEGEGVTTER.D	non-specific cleavage	1479.68	-2	740.848	2	24593	1794	1806
LEP	A.NIEFEGEGVTTERDVDAEHLFAK.G	non-specific cleavage	2605.23	4.6	869.421	3	37417	1794	1816
trypsin	N.IEFEGEGVTTER.D	non-specific cleavage	1365.64	-3.5	683.826	2	23074	1795	1806
LEP	N.IEFEGEGVTTERDVDAEHLFAK.G	non-specific cleavage	2491.19	1.9	623.805	4	37411	1795	1816
LEP	I.EFEGEGVTTERDVDAEHLFAK.G	non-specific cleavage	2378.1	-2.2	793.706	3	37325	1796	1816
LEP	E.FEGEGVTTERDVDAEHLFAK.G	non-specific cleavage	2249.06	0.8	750.695	3	37318	1797	1816
Glu-C	E.FEGEGVTTER.D		1123.51	0.1	562.765	2	10361	1797	1806
LEP	E.RDVDAEHLFAK.G	non-specific cleavage	1299.66	3.4	434.228	3	19634	1806	1816
LEP	R.DVDAEHLFAK.G	non-specific cleavage	1143.56	-0.9	382.192	3	27548	1807	1816
trypsin	R.DVDAEHLFAK.G		1143.56	-0.8	572.785	2	25187	1807	1816
LEP	D.VDAEHLFAK.G	non-specific cleavage	1028.53	3.7	515.274	2	23841	1808	1816
trypsin	D.VDAEHLFAK.G	non-specific cleavage	1028.53	0.3	515.272	2	25284	1808	1816
trypsin	V.DAEHLFAK.G	non-specific cleavage	929.461	0.5	465.738	2	25219	1809	1816
LEP	V.DAEHLFAK.G	non-specific cleavage	929.461	2	465.738	2	27600	1809	1816
trypsin	D.AEHLFAK.G	non-specific cleavage	814.434	-0.3	408.224	2	25269	1810	1816
Glu-C	E.QENYC(+57.02)DFE.I	Carbamidomethylation	1103.39	1.2	552.701	2	20439	1835	1842
Glu-C	E.ILHNGIHSWVGGSK.T		1503.79	-2.7	752.903	2	14775	1847	1860
Glu-C	I.LHNGIHSWVGGSK.T	non-specific cleavage	1390.71	-0.3	696.362	2	14847	1848	1860
LEP	L.HNGIHSWVGGSK.T	non-specific cleavage	1277.63	0.5	426.883	3	9747	1849	1860
Glu-C	L.HNGIHSWVGGSK.T	non-specific cleavage	1277.63	-0.2	639.82	2	14796	1849	1860
Glu-C	H.NGIHSWVGGSK.T	non-specific cleavage	1140.57	-1.4	571.29	2	14886	1850	1860
Glu-C	N.GIHSWVGGSK.T	non-specific cleavage	1026.52	0.3	514.27	2	10267	1851	1860
trypsin	N.GIHSWVGGSK.T	non-specific cleavage	1026.52	-0.8	343.182	3	11426	1851	1860
LEP	N.GIHSWVGGSK.T	non-specific cleavage	1026.52	1	343.183	3	13498	1851	1860
LEP	K.THSIGHLH.Y	non-specific cleavage	900.457	-1.5	301.159	3	2729	1861	1868
Glu-C	K.THSIGHLHY.A	non-specific cleavage	1063.52	-1.4	355.513	3	8179	1861	1869
LEP	K.THSIGHLHYASYDPLFYIH.H	non-specific cleavage	2270.09	-2.3	568.529	4	38235	1861	1879
trypsin	K.THSIGHLHYASYDPLFYIHHSQTDR.I		2994.42	1.4	749.612	4	29410	1861	1885
Glu-C	K.THSIGHLHYASYDPLFYIHHSQTDR.I		2994.42	0.1	599.891	5	30075	1861	1885
trypsin	H.SIGHLHYASYDPLFYIHHSQTDR.I	non-specific cleavage	2756.31	1.4	552.27	5	32446	1863	1885
Glu-C	H.SIGHLHYASYDPLFYIHHSQTDR.I	non-specific cleavage	2756.31	-0.8	690.084	4	55126	1863	1885
Glu-C	F.YIHHSQTDR.I	non-specific cleavage	1155.54	-3.2	578.777	2	31441	1877	1885
trypsin	I.WAIWQALQEHR.G	non-specific cleavage	1436.73	0.3	719.373	2	49897	1887	1897
trypsin	W.AIWQALQEHR.G	non-specific cleavage	1250.65	2.6	626.335	2	45823	1888	1897
LEP	K.EAHC(+57.02)ALEQMK.D	Carbamidomethylation	1215.54	2.1	608.777	2	10552	1903	1912
LEP	K.EAHC(+57.02)ALEQMKDPLK.P	Carbamidomethylation	1668.8	3	418.208	4	21794	1903	1916
LEP	K.EAHC(+57.02)ALEQM(+15.99)K.D	Carbamidomethylation; Oxidation (M)	1231.53	0.1	616.774	2	10614	1903	1912
LEP	K.E(-18.01)AHC(+57.02)ALEQMK.D	Pyro-glu from E; Carbamidomethylation	1197.53	-0.1	599.771	2	17987	1903	1912
LEP	K.E(-18.01)AHC(+57.02)ALEQM(+15.99)K.D	Pyro-glu from E; Carbamidomethylation; Oxidation (M)	1213.52	-0.8	607.768	2	9791	1903	1912
Glu-C	E.AHC(+57.02)ALEQM(+15.99)K.D	Carbamidomethylation; Oxidation (M)	1102.49	9.7	552.258	2	2768	1904	1912
LEP	A.HC(+57.02)ALEQMK.D	Carbamidomethylation, non-specific cleavage	1015.46	-0.1	508.736	2	10702	1905	1912
LEP	A.HC(+57.02)ALEQMKDPLKPFSFGSPYNLNK.R	Carbamidomethylation, non-specific cleavage	2820.37	-7.9	706.095	4	45025	1905	1928
trypsin	H.C(+57.02)ALEQMK.D	Carbamidomethylation, non-specific cleavage	878.399	1.4	440.207	2	10272	1906	1912
LEP	C.ALEQMK.D	non-specific cleavage	718.368	1.2	360.192	2	6667	1907	1912
trypsin	K.DPLKPFSFGSPYNLNK.R		1822.93	2.8	608.651	3	41859	1913	1928
LEP	K.DPLKPFSFGSPYNLNK.R		1822.93	1.7	608.65	3	43667	1913	1928
LEP	K.PFS(-18.01)FGSPYNLNK.R	Dehydration	1351.66	-9	676.829	2	38250	1917	1928
trypsin	K.PFSFGSPYNLNK.R		1369.67	-2	685.839	2	36424	1917	1928
Glu-C	K.PFSFGSPYNLNK.R		1369.67	-6.4	685.836	2	34633	1917	1928
LEP	K.PFSFGSPYNLNK.R		1369.67	0.7	685.841	2	38277	1917	1928
LEP	P.FSFGSPYNLNK.R	non-specific cleavage	1272.61	2.7	637.316	2	36669	1918	1928
trypsin	F.SFGSPYNLNK.R	non-specific cleavage	1125.55	0.7	563.78	2	21652	1919	1928
LEP	S.FGSPYNLNK.R	non-specific cleavage	1038.51	-0.1	520.264	2	22303	1920	1928
LEP	S.PYNLNK.R	non-specific cleavage	747.391	3.1	374.704	2	12010	1923	1928
LEP	K.RTQEFSKPEDTFDYHRFGYEYDSLEFVGM(+15.99)SVSSLHNYIK.Q	Oxidation (M)	4737.18	1.1	948.443	5	49180	1929	1967
trypsin	K.RTQEFSKPEDTFDYHR.F		2054.94	4.7	514.746	4	14554	1929	1944
LEP	K.RTQEFSK.P		894.456	-1.3	448.235	2	2323	1929	1935
LEP	K.RTQEFSKPEDTFDYHRFGYEYDSLEFVGMSVSSLHNYIK.Q		4721.18	-1	945.242	5	51610	1929	1967
trypsin	R.TQEFSKPEDTFDYHR.F		1898.84	1.8	475.719	4	18747	1930	1944
trypsin	T.QEFSKPEDTFDYHR.F	non-specific cleavage	1797.8	1.4	600.273	3	18368	1931	1944
trypsin	Q.EFSKPEDTFDYHR.F	non-specific cleavage	1669.74	-0.4	557.586	3	18317	1932	1944
trypsin	E.FSKPEDTFDYHR.F	non-specific cleavage	1540.69	4.8	514.575	3	18360	1933	1944
Glu-C	E.FSKPEDTFDYHR.F		1540.69	0.4	386.181	4	14993	1933	1944
trypsin	F.SKPEDTFDYHR.F	non-specific cleavage	1393.63	1.4	465.55	3	10196	1934	1944
LEP	F.SKPEDTFDYHRFGYEYDSLEFVGM(+15.99)SVSSLHNYIK.Q	Oxidation (M), non-specific cleavage	4075.86	1.4	816.18	5	50778	1934	1967
LEP	F.SKPEDTFDYHRFGYEYDSLEFVGM(+15.99)SVSSLHNYIK.Q	Oxidation (M), non-specific cleavage	4075.86	1.4	816.18	5	50778	1934	1967
LEP	K.PEDTFDYH.R	non-specific cleavage	1022.4	1.7	512.207	2	18456	1936	1943
LEP	K.PEDTFDYHRFGYEYDSLEFVGMSVSSLH.N	non-specific cleavage	3326.45	-0.5	832.619	4	53768	1936	1963
LEP	K.PEDTFDYHRFGYEYDSLEFVGM(+15.99)SVSSLHNYIK.Q	Oxidation (M)	3860.73	3.4	773.156	5	53516	1936	1967
trypsin	K.PEDTFDYHR.F		1178.5	5.5	590.26	2	18322	1936	1944
Glu-C	K.PEDTFDYHR.F		1178.5	1.4	393.841	3	10765	1936	1944
LEP	K.PEDTFDYHRFGYEYDSLEFVGMSVSSLHNYIK.Q		3844.74	-0.1	962.191	4	53899	1936	1967
trypsin	P.EDTFDYHR.F	non-specific cleavage	1081.45	0.2	541.731	2	11847	1937	1944
trypsin	E.DTFDYHR.F	non-specific cleavage	952.404	-0.6	477.209	2	11871	1938	1944
trypsin	R.FGYEYDSLEFVGMSVSSLH.N	non-specific cleavage	2165.96	2.8	1083.99	2	51210	1945	1963
trypsin	R.FGYEYDSLEFVGM(+15.99)SVSSLHNYIK.Q	Oxidation (M)	2700.24	-1.2	901.087	3	50573	1945	1967
trypsin	R.FGYEYDSLEFVGM(+15.99)SVS(-18.01)SLHNYIK.Q	Oxidation (M); Dehydration	2682.23	0.1	895.085	3	50655	1945	1967
LEP	D.SLEFVGM(+15.99)SVSSLHNYIK.Q	Oxidation (M), non-specific cleavage	1925.96	4	642.995	3	43105	1951	1967
LEP	D.SLEFVGM(+15.99)SVSSLHNYIK.Q	Oxidation (M), non-specific cleavage	1925.96	4	642.995	3	43105	1951	1967
Glu-C	E.FVGMSVSSLHNYIK.Q		1580.8	-2.3	791.407	2	35300	1954	1967
Glu-C	V.GMSVSSLHNYIK.Q	non-specific cleavage	1334.67	-1.4	668.339	2	35391	1956	1967
LEP	M.SVSSLHNYIK.Q	non-specific cleavage	1146.6	1.7	574.31	2	17944	1958	1967
LEP	S.VSSLHNYIK.Q	non-specific cleavage	1059.57	1.4	530.794	2	18012	1959	1967
LEP	S.SLHNYIK.Q	non-specific cleavage	873.471	-0.2	437.743	2	9555	1961	1967
LEP	S.LHNYIK.Q	non-specific cleavage	786.439	-1.7	394.226	2	9585	1962	1967
LEP	L.HNYIK.Q	non-specific cleavage	673.355	-0.9	337.684	2	9590	1963	1967
LEP	K.QQQEAD(-18.01)RVFAGFLLK.G	Dehydration	1730.91	-0.2	577.977	3	44846	1968	1982
LEP	K.QQQEADRVFAGF.L	non-specific cleavage	1394.66	2.6	698.338	2	36583	1968	1979
trypsin	K.Q(-17.03)QQEADRVFAGFLLK.G	Pyro-glu from Q	1731.89	0.5	866.955	2	50827	1968	1982
LEP	K.Q(-17.03)QQEADRVFAGFLLK.G	Pyro-glu from Q	1731.89	-0.4	578.305	3	53977	1968	1982
LEP	K.QQQEADRVFAGFLLK.G		1748.92	3.1	875.471	2	44805	1968	1982
LEP	Q.QQEADRVFAGFLLK.G	non-specific cleavage	1620.86	0.4	541.295	3	44919	1969	1982
LEP	Q.QEADRVFAGFLLK.G	non-specific cleavage	1492.8	-2.4	747.407	2	44863	1970	1982
LEP	Q.EADRVFAGFLLK.G	non-specific cleavage	1364.75	1.5	455.923	3	44517	1971	1982
LEP	E.ADRVFAGFLLK.G	non-specific cleavage	1235.7	-1.1	618.858	2	44884	1972	1982
LEP	A.DRVFAGFLLK.G	non-specific cleavage	1164.67	2.9	389.23	3	43309	1973	1982
LEP	R.VFAGFLLK.G	non-specific cleavage	893.537	-0.3	447.776	2	45418	1975	1982
trypsin	R.VFAGFLLK.G		893.537	0.2	447.776	2	44219	1975	1982
LEP	F.AGFLLK.G	non-specific cleavage	647.401	0.6	324.708	2	27502	1977	1982
LEP	K.GFGQSASVSFDIC(+57.02)RPDQSC(+57.02)QEAGYFSVLGGSSEMPWQFDRLYK.Y	Carbamidomethylation	4893.19	0.3	1224.31	4	53961	1983	2025
Glu-C	E.AGYFSVLGGSSEM(+15.99)PWQFDR.L	Oxidation (M)	2148.96	-2.5	1075.48	2	47496	2004	2022
Glu-C	E.AGYFSVLGGSSEMPWQFDR.L		2132.96	-1.9	711.993	3	49307	2004	2022
LEP	A.GYFSVLGGSSEM(+15.99)PWQFDRLYK.Y	Oxidation (M), non-specific cleavage	2482.16	1.2	828.396	3	50810	2005	2025
LEP	A.GYFSVLGGSSEM(+15.99)PWQFDRLYK.Y	Oxidation (M), non-specific cleavage	2482.16	1.2	828.396	3	50810	2005	2025
Glu-C	F.SVLGGSSEMPWQFDR.L	non-specific cleavage	1694.77	-1.5	848.392	2	41716	2008	2022
trypsin	F.SVLGGSSEMPWQFDR.L	non-specific cleavage	1694.77	-0.5	848.393	2	43698	2008	2022
LEP	F.SVLGGSSEMPWQFDRLYK.Y	non-specific cleavage	2099.01	-0.1	700.679	3	46506	2008	2025
Glu-C	F.SVLGGSSEM(+15.99)PWQFDR.L	Oxidation (M), non-specific cleavage	1710.77	1.6	856.392	2	34860	2008	2022
Glu-C	F.SVLGGSSEM(+15.99)PWQFDR.L	Oxidation (M), non-specific cleavage	1710.77	1.6	856.392	2	34860	2008	2022
LEP	S.VLGGSSEMPWQFDRLYK.Y	non-specific cleavage	2011.98	2.6	1007	2	44893	2009	2025
LEP	S.VLGGSSEM(+15.99)PWQFDRLYK.Y	Oxidation (M), non-specific cleavage	2027.98	0.4	677	3	39651	2009	2025
LEP	S.VLGGSSEM(+15.99)PWQFDRLYK.Y	Oxidation (M), non-specific cleavage	2027.98	0.4	677	3	39651	2009	2025
LEP	L.GGSSEMPWQFDR.L	non-specific cleavage	1395.59	2.7	698.803	2	36443	2011	2022
LEP	L.GGSSEMPWQFDRLYK.Y	non-specific cleavage	1799.83	2.4	600.952	3	40275	2011	2025
LEP	G.GSSEMPWQFDRLYK.Y	non-specific cleavage	1742.81	4.3	581.946	3	40405	2012	2025
LEP	G.SSEMPWQFDRLYK.Y	non-specific cleavage	1685.79	2.7	562.938	3	40584	2013	2025
Glu-C	E.MPWQFDR.L		978.438	-1.3	490.226	2	30312	2016	2022
LEP	K.YDITK.T		638.327	-1.1	320.171	2	9152	2026	2030
LEP	K.YDITKTLK.D		980.554	-0.5	491.284	2	19435	2026	2033
LEP	K.LRYDDT(-18.01)FTIK.V	Dehydration	1252.65	1	418.556	3	27961	2037	2046
trypsin	K.LRYDDTFTIK.V		1270.66	0.2	424.559	3	25614	2037	2046
LEP	K.LRYDDTFTIK.V		1270.66	0.5	636.335	2	27748	2037	2046
LEP	L.RYDDTFTIK.V	non-specific cleavage	1157.57	0.5	579.793	2	27668	2038	2046
trypsin	R.YDDT(-18.01)FTIK.V	Dehydration	983.46	1.7	492.738	2	24213	2039	2046
LEP	R.YDDTFTIK.V	non-specific cleavage	1001.47	-1.1	501.742	2	27756	2039	2046
trypsin	R.YDDTFTIK.V		1001.47	-0.5	501.742	2	24660	2039	2046
Glu-C	R.YDDTFTIK.V		1001.47	-0.4	501.742	2	22776	2039	2046
LEP	Y.DDTFTIK.V	non-specific cleavage	838.407	1.3	420.211	2	23312	2040	2046
LEP	D.DTFTIK.V	non-specific cleavage	723.38	1.5	362.698	2	21124	2041	2046
LEP	K.DIAGAELDSDLIPTPS.V	non-specific cleavage	1612.78	1.9	807.4	2	53852	2051	2066
LEP	R.IRMELSELTER.D	non-specific cleavage	1375.71	0.7	688.864	2	31599	2086	2096
trypsin	R.IRMELSELTER.D		1375.71	0.2	459.578	3	29470	2086	2096
trypsin	R.MELS(-18.01)ELTER.D	Dehydration	1088.52	3.3	545.268	2	27418	2088	2096
trypsin	R.M(+15.99)ELSELTER.D	Oxidation (M)	1122.52	1.1	562.269	2	19891	2088	2096
Glu-C	R.M(+15.99)ELSELTER.D	Oxidation (M)	1122.52	0	562.269	2	17871	2088	2096
trypsin	R.MELSELTER.D		1106.53	1.5	554.272	2	27502	2088	2096
Glu-C	R.MELSELTER.D		1106.53	1.1	554.272	2	26242	2088	2096
trypsin	M.ELSELTER.D	non-specific cleavage	975.487	1.1	488.751	2	15295	2089	2096
LEP	R.DLASLK.S	non-specific cleavage	645.37	1.4	323.693	2	17548	2097	2102
Glu-C	R.SLQADDGVNGYQAIASFHGLPASC(+57.02)HDDEGHE.I	Carbamidomethylation	3296.41	-0.2	825.109	4	35749	2107	2137
LEP	R.SLQADDGVNGYQAIASFHGLPASC(+57.02)HDDEGHEIA.C	Carbamidomethylation, non-specific cleavage	3480.53	-0.6	871.139	4	40901	2107	2139
trypsin	R.SLQADDGVNGYQAIASFH.G	non-specific cleavage	1891.87	0.6	946.943	2	38514	2107	2124
Glu-C	R.SLQADDGVNGYQAIASFHGLPASCHDDEG.H	non-specific cleavage	2973.28	-0.6	992.101	3	38605	2107	2135
trypsin	R.SLQADDGVNGYQAIASFHGLPA.S	non-specific cleavage	2230.07	2.5	1116.04	2	47615	2107	2128
Glu-C	R.SLQADDGVNGYQAIASFH.G	non-specific cleavage	1891.87	0.6	946.943	2	36842	2107	2124
trypsin	H.GM(+15.99)PVFPHWHR.L	Oxidation (M), non-specific cleavage	1278.61	1.6	427.211	3	19748	2144	2153
trypsin	H.GM(+15.99)PVFPHWHR.L	Oxidation (M), non-specific cleavage	1278.61	1.6	427.211	3	19748	2144	2153
trypsin	R.LYTLQMDMALLSHGS.A	non-specific cleavage	1678.81	3	840.413	2	50687	2154	2168
LEP	R.LYTLQMDMALLSHGSAVAIPYWDWTK.P	non-specific cleavage	3009.48	0.9	1004.17	3	54890	2154	2179
trypsin	R.LYTLQM(+15.99)DM(+15.99)ALLSHGSAVAIPYWDWTK.P	Oxidation (M)	3041.47	-2.7	1014.83	3	50725	2154	2179
trypsin	R.LYTLQMDM(+15.99)ALLSHGSAVAIPYWDWTK.P	Oxidation (M)	3025.47	0.9	1009.5	3	51066	2154	2179
Glu-C	R.LYTLQM(+15.99)D.M	Oxidation (M)	898.411	-1.3	450.212	2	23066	2154	2160
trypsin	R.LYTLQMDM(+15.99)ALLSH.G	Oxidation (M), non-specific cleavage	1550.75	3.5	776.384	2	45214	2154	2166
LEP	R.LYTLQMDM(+15.99)ALLSHGSAVAIPYWDWTK.P	Oxidation (M), non-specific cleavage	3025.47	1.7	1009.5	3	54408	2154	2179
trypsin	R.LYTLQMDM(+15.99)ALLSH.G	Oxidation (M), non-specific cleavage	1550.75	3.5	776.384	2	45214	2154	2166
LEP	R.LYTLQMDM(+15.99)ALLSHGSAVAIPYWDWTK.P	Oxidation (M), non-specific cleavage	3025.47	1.7	1009.5	3	54408	2154	2179
trypsin	R.LYTLQMDMALLSHGSAVAIPYWDWTK.P		3009.48	0.5	753.377	4	51565	2154	2179
Glu-C	R.LYTLQMD.M		882.416	0.7	442.215	2	34232	2154	2160
trypsin	L.QMDMALLSHGSAVAIPYWDWTK.P	non-specific cleavage	2519.2	-3	840.737	3	50739	2158	2179
trypsin	M.DMALLSHGSAVAIPYWDWTK.P	non-specific cleavage	2260.1	0.9	754.374	3	50890	2160	2179
LEP	M.DMALLSHGSAVAIPYWDWTK.P	non-specific cleavage	2260.1	-0.5	1131.06	2	54188	2160	2179
Glu-C	D.M(+15.99)ALLSHGSAVAIPYWDWTK.P	Oxidation (M)	2161.07	2.5	721.365	3	46963	2161	2179
Glu-C	D.MALLSHGSAVAIPYWDWTK.P		2145.07	1.6	716.032	3	47990	2161	2179
LEP	M.ALLSHGSAVAIPYWDWTK.P	non-specific cleavage	2014.03	10.2	1008.03	2	48946	2162	2179
LEP	A.LLSHGSAVAIPYWDWTK.P	non-specific cleavage	1942.99	0.4	648.672	3	47090	2163	2179
Glu-C	L.LSHGSAVAIPYWDWTK.P	non-specific cleavage	1829.91	-1.6	610.976	3	41018	2164	2179
trypsin	S.HGSAVAIPYWDWTK.P	non-specific cleavage	1629.79	0	544.272	3	42234	2166	2179
trypsin	H.GSAVAIPYWDWTK.P	non-specific cleavage	1492.73	0.9	747.375	2	48622	2167	2179
LEP	H.GSAVAIPYWDWTK.P	non-specific cleavage	1492.73	1.6	747.376	2	50050	2167	2179
LEP	S.AVAIPYWDWTK.P	non-specific cleavage	1348.68	-0.1	675.348	2	50042	2169	2179
LEP	V.AIPYWDWTK.P	non-specific cleavage	1178.58	2.4	590.297	2	44268	2171	2179
LEP	K.LPDLFTSPEYYDPWRDAVV.N	non-specific cleavage	2282.09	2.3	1142.05	2	54936	2184	2202
LEP	K.LPDLFTSPEYYDPWRDAVVNNPF.A	non-specific cleavage	2754.3	-0.3	1378.15	2	55201	2184	2206
trypsin	K.LPDLFTSPEYYDPWRDAVVNNPFAK.G		2953.43	1	985.484	3	51131	2184	2208
Glu-C	K.LPDLFTSPEYYDPWR.D		1897.89	-0.9	949.951	2	49435	2184	2198
LEP	K.LPDLFTSPEYYDPWRDAVVNNPFAK.G		2953.43	-0.7	1477.72	2	54457	2184	2208
LEP	P.DLFTSPEYYDPWRDAVVNNPFAK.G	non-specific cleavage	2743.29	0.2	915.438	3	54297	2186	2208
LEP	D.PWRDAVVNNPFAK.G	non-specific cleavage	1512.78	1.6	505.269	3	32525	2196	2208
LEP	W.RDAVVNNPFAK.G	non-specific cleavage	1229.65	2.2	410.892	3	21844	2198	2208
Glu-C	R.DAVVNNPFAK.G		1073.55	1.7	537.783	2	26154	2199	2208
LEP	D.AVVNNPFAK.G	non-specific cleavage	958.524	1.9	480.27	2	26133	2200	2208
LEP	A.VVNNPFAK.G	non-specific cleavage	887.486	0.5	444.751	2	21651	2201	2208
LEP	K.SEDAYTVRDPQDILYHLQD.E	non-specific cleavage	2277.05	-2.7	760.024	3	44625	2213	2231
LEP	K.SEDAYTVRDPQDILYHLQDETGTS.V	non-specific cleavage	2752.25	1.6	918.424	3	46708	2213	2236
LEP	K.SEDAYTVRDPQDILYHLQDETGT.S	non-specific cleavage	2665.21	2.8	889.415	3	47530	2213	2235
LEP	K.SEDAYTVRDPQDILYHLQDETGTSVLLDQT.L	non-specific cleavage	3421.62	1	1141.55	3	54008	2213	2242
trypsin	K.SEDAYTVR.D		939.43	0.2	470.722	2	7998	2213	2220
trypsin	R.DPQDILYH.L	non-specific cleavage	999.466	-0.1	500.74	2	25843	2221	2228
Glu-C	R.DPQDILYHLQ.D	non-specific cleavage	1240.61	-1.4	621.311	2	40389	2221	2230
trypsin	R.DPQDILYHLQ.D	non-specific cleavage	1240.61	2.9	621.313	2	41811	2221	2230
Glu-C	R.DPQDILYHLQD.E		1355.64	-0.5	678.825	2	40251	2221	2231
Glu-C	R.DPQDILYHLQDE.T		1484.68	0.6	743.347	2	43068	2221	2232
Glu-C	D.PQDILYHLQDE.T		1369.65	3.6	685.835	2	31128	2222	2232
Glu-C	E.TGTSVLLDQTLLALE.Q		1572.86	3.4	787.441	2	50197	2233	2247
trypsin	L.ALEQTDFC(+57.02)DFEVQFEVVHNAIHYLVGGR.Q	Carbamidomethylation, non-specific cleavage	3292.56	4.2	824.151	4	51722	2245	2272
trypsin	A.LEQTDFC(+57.02)DFEVQFEVVHNAIHYLVGGR.Q	Carbamidomethylation, non-specific cleavage	3221.52	3.2	806.391	4	51674	2246	2272
trypsin	L.EQTDFC(+57.02)DFEVQFEVVHNAIHYLVGGR.Q	Carbamidomethylation, non-specific cleavage	3108.44	2.5	778.119	4	51619	2247	2272
trypsin	T.DFC(+57.02)DFEVQFEVVHNAIHYLVGGR.Q	Carbamidomethylation, non-specific cleavage	2750.29	0.9	688.581	4	51914	2250	2272
Glu-C	E.VVHN(-17.03)AIHYLVGGR.Q	Ammonia-loss (N)	1416.76	1.9	355.199	4	18603	2260	2272
Glu-C	E.VVHNAIHYLVGGR.Q		1433.79	0.7	717.902	2	18445	2260	2272
Glu-C	V.VHNAIHYLVGGR.Q	non-specific cleavage	1334.72	-0.1	445.914	3	18460	2261	2272
LEP	H.NAIHYLVGGRQVYALS.S	non-specific cleavage	1759.94	3.8	880.979	2	35102	2263	2278
trypsin	R.QVYALSSQHYASYDPAFFIHH.S	non-specific cleavage	2480.15	3.4	621.048	4	46945	2273	2293
trypsin	R.QVYALSSQHYASYDPAFFIHHSFVDK.I		3056.45	-0.5	612.296	5	47364	2273	2298
LEP	Q.HYASYDPAFFIHH.S	non-specific cleavage	1603.72	2.5	535.582	3	33772	2281	2293
trypsin	Q.HYASYDPAFFIHHSFVDK.I	non-specific cleavage	2180.01	0	546.01	4	36207	2281	2298
LEP	Q.HYASYDPAFFIHHSFVDK.I	non-specific cleavage	2180.01	0.9	546.011	4	37989	2281	2298
Glu-C	H.YASYDPAFFIHHSFVDK.I	non-specific cleavage	2042.95	-4.7	681.988	3	38897	2282	2298
LEP	H.YASYDPAFFIHHSFVDK.I	non-specific cleavage	2042.95	4.4	1022.49	2	42340	2282	2298
Glu-C	Y.ASYDPAFFIHH.S	non-specific cleavage	1303.6	0.6	435.54	3	33323	2283	2293
LEP	Y.ASYDPAFFIHH.S	non-specific cleavage	1303.6	2.4	435.541	3	36835	2283	2293
trypsin	Y.ASYDPAFFIHHSFVDK.I	non-specific cleavage	1879.89	0	470.98	4	38685	2283	2298
LEP	Y.ASYDPAFFIHHSFVDK.I	non-specific cleavage	1879.89	2.8	470.981	4	40440	2283	2298
Glu-C	A.SYDPAFFIHH.S	non-specific cleavage	1232.56	-5.4	617.285	2	32402	2284	2293
trypsin	A.SYDPAFFIHH.S	non-specific cleavage	1232.56	1.2	617.289	2	34065	2284	2293
LEP	A.SYDPAFFIHH.S	non-specific cleavage	1232.56	1.1	411.861	3	35801	2284	2293
Glu-C	A.SYDPAFFIHHSFVDK.I	non-specific cleavage	1808.85	0.3	603.958	3	36377	2284	2298
trypsin	A.SYDPAFFIHHSFVDK.I	non-specific cleavage	1808.85	0	453.22	4	37998	2284	2298
LEP	A.SYDPAFFIHHSFVDK.I	non-specific cleavage	1808.85	-0.5	453.22	4	39771	2284	2298
LEP	S.YDPAFFIHHSFVDK.I	non-specific cleavage	1721.82	3.9	574.949	3	39286	2285	2298
LEP	Y.DPAFFIHH.S	non-specific cleavage	982.466	-0.3	492.24	2	30709	2286	2293
trypsin	Y.DPAFFIHHSFVDK.I	non-specific cleavage	1558.76	-1.7	520.592	3	38100	2286	2298
LEP	Y.DPAFFIHHSFVDK.I	non-specific cleavage	1558.76	-0.5	520.593	3	39835	2286	2298
LEP	D.PAFFIHHSFVDK.I	non-specific cleavage	1443.73	1.8	722.874	2	41034	2287	2298
trypsin	D.PAFFIHHSFVDK.I	non-specific cleavage	1443.73	0.8	722.873	2	47336	2287	2298
LEP	P.AFFIHHSFVDK.I	non-specific cleavage	1346.68	0.7	674.346	2	41007	2288	2298
LEP	K.IWAVWQAL.Q	non-specific cleavage	985.538	3.1	493.778	2	55712	2299	2306
LEP	K.IWAVWQALQK.K		1241.69	-0.5	621.853	2	51112	2299	2308
LEP	A.VWQALQK.K	non-specific cleavage	871.492	0.2	436.753	2	19780	2302	2308
LEP	K.ADC(+57.02)ALNMMTK.P	Carbamidomethylation	1153.49	5.2	577.757	2	24122	2317	2326
LEP	K.ADC(+57.02)ALNM(+15.99)M(+15.99)TK.P	Carbamidomethylation; Oxidation (M)	1185.48	4	593.751	2	24186	2317	2326
LEP	K.ADC(+57.02)ALNM(+15.99)MTK.P	Carbamidomethylation; Oxidation (M)	1169.49	0.6	585.752	2	22547	2317	2326
LEP	K.ADC(+57.02)ALNMM(+15.99)TK.P	Carbamidomethylation; Oxidation (M)	1169.49	1.2	585.752	2	21841	2317	2326
LEP	A.DC(+57.02)ALNMMTK.P	Carbamidomethylation, non-specific cleavage	1082.46	5.2	542.238	2	24260	2318	2326
LEP	C.ALNMMTK.P	non-specific cleavage	807.398	1.3	404.707	2	16567	2320	2326
LEP	K.PMRPFAHDFNHN(-17.03)GFTK.M	Ammonia-loss (N)	1897.87	2	475.475	4	21812	2327	2342
LEP	K.PMRPFAHDFNHNGFTK.M		1914.89	8.3	639.311	3	20479	2327	2342
LEP	M.RPFAHDFNHNGFTK.M	non-specific cleavage	1686.8	0.3	422.708	4	14759	2329	2342
Glu-C	F.AHDFNHNGFTK.M	non-specific cleavage	1286.58	0.8	429.867	3	5621	2332	2342
trypsin	F.AHDFNHNGFTK.M	non-specific cleavage	1286.58	1.9	429.868	3	6065	2332	2342
trypsin	H.DFNHNGFTK.M	non-specific cleavage	1078.48	3	540.25	2	10767	2334	2342
LEP	H.DFNHNGFTK.M	non-specific cleavage	1078.48	0.9	540.249	2	12868	2334	2342
trypsin	K.M(+15.99)HAVPNTLFDFQDLFYTYDNLEIAGM(+15.99)NVNQLEAEINRRK.S	Oxidation (M)	4661.23	3.6	933.257	5	51326	2343	2381
LEP	K.M(+15.99)HAVPNTLFDFQDLFYTYDNLEIAGM(+15.99)NVNQLEAEINRRK.S	Oxidation (M)	4661.23	1	1166.32	4	54648	2343	2381
LEP	K.M(+15.99)HAVPNTLFDFQDLFYTYDNLEIAGMNVNQLEAEINRRK.S	Oxidation (M)	4645.24	2.1	1549.42	3	54858	2343	2381
LEP	N.TLFDFQDLFYTYDNLEIAGMNVNQLEAEINRRK.S	non-specific cleavage	3979.94	3.7	995.996	4	55184	2349	2381
LEP	Y.DNLEIAGM(+15.99)NVNQLEAEINRRK.S	Oxidation (M), non-specific cleavage	2442.23	2.1	815.085	3	39481	2361	2381
LEP	Y.DNLEIAGM(+15.99)NVNQLEAEINRRK.S	Oxidation (M), non-specific cleavage	2442.23	2.1	815.085	3	39481	2361	2381
LEP	E.IAGMNVNQLEAEINRRK.S	non-specific cleavage	1955.04	1.7	489.767	4	34191	2365	2381
Glu-C	E.IAGM(+15.99)NVNQLE.A	Oxidation (M)	1103.53	2.3	552.773	2	28054	2365	2374
Glu-C	E.IAGMNVNQLE.A		1087.53	1	544.774	2	31835	2365	2374
Glu-C	E.IAGMNVNQLEAE.I		1287.61	2.8	644.816	2	32893	2365	2376
Glu-C	E.IAGMNVNQLEAEINR.R		1670.84	1.2	836.429	2	38957	2365	2379
trypsin	A.GMNVNQLEAEINRR.K	non-specific cleavage	1642.82	1.9	548.615	3	30961	2367	2380
trypsin	A.GMNVNQLEAEINR.R	non-specific cleavage	1486.72	-0.4	744.367	2	34447	2367	2379
trypsin	A.GM(+15.99)NVNQLEAEINR.R	Oxidation (M), non-specific cleavage	1502.71	-3.3	752.362	2	25487	2367	2379
LEP	A.GM(+15.99)NVNQLEAEINRRK.S	Oxidation (M), non-specific cleavage	1786.91	0.9	447.735	4	20880	2367	2381
LEP	A.GM(+15.99)NVNQLEAEINRRK.S	Oxidation (M), non-specific cleavage	1786.91	0.9	447.735	4	20880	2367	2381
trypsin	A.GM(+15.99)NVNQLEAEINR.R	Oxidation (M), non-specific cleavage	1502.71	-3.3	752.362	2	25487	2367	2379
trypsin	M.NVNQLEAEINR.R	non-specific cleavage	1298.66	0.6	650.337	2	23646	2369	2379
trypsin	N.VNQLEAEINR.R	non-specific cleavage	1184.61	1.4	593.316	2	19413	2370	2379
Glu-C	N.QLEAEINR.R	non-specific cleavage	971.504	1.2	486.76	2	12241	2372	2379
trypsin	N.QLEAEINR.R	non-specific cleavage	971.504	-0.6	486.759	2	12908	2372	2379
LEP	L.EAEINRRK.S	non-specific cleavage	1014.56	2.6	508.287	2	28492	2374	2381
trypsin	R.VFAGFLLHGIGR.S		1285.73	-3.4	643.87	2	43884	2386	2397
Glu-C	R.VFAGFLLHGIGR.S		1285.73	1.8	429.585	3	42641	2386	2397
Glu-C	V.FAGFLLHGIGR.S	non-specific cleavage	1186.66	0.7	594.338	2	42281	2387	2397
trypsin	V.FAGFLLHGIGR.S	non-specific cleavage	1186.66	-0.9	594.337	2	43907	2387	2397
Glu-C	F.AGFLLHGIGR.S	non-specific cleavage	1039.59	0.8	520.804	2	42271	2388	2397
trypsin	F.AGFLLHGIGR.S	non-specific cleavage	1039.59	-1.6	520.803	2	43902	2388	2397
Glu-C	A.GFLLHGIGR.S	non-specific cleavage	968.556	-0.7	485.285	2	42341	2389	2397
trypsin	A.GFLLHGIGR.S	non-specific cleavage	968.556	-0.6	485.285	2	43935	2389	2397
LEP	R.SADVRFWIC(+57.02)K.T	Carbamidomethylation, non-specific cleavage	1280.63	1.7	641.325	2	33608	2398	2407
trypsin	R.FWIC(+57.02)K.T	Carbamidomethylation	752.368	0.5	377.191	2	26514	2403	2407
Glu-C	R.FWIC(+57.02)K.T	Carbamidomethylation	752.368	1.3	377.192	2	24571	2403	2407
LEP	R.FWIC(+57.02)K.T	Carbamidomethylation, non-specific cleavage	752.368	0	377.191	2	27625	2403	2407
trypsin	K.TADDC(+57.02)HASGMIFILGGSK.E	Carbamidomethylation	1878.86	2.8	627.296	3	40216	2408	2425
Glu-C	K.TADDC(+57.02)HASGMIFILGGSK.E	Carbamidomethylation	1878.86	-1.5	940.436	2	38649	2408	2425
LEP	K.TADDC(+57.02)HASGMIFILGGSK.E	Carbamidomethylation	1878.86	0.8	940.438	2	41979	2408	2425
LEP	K.TADDC(+57.02)HASGM(+15.99)IFILGGSK.E	Carbamidomethylation; Oxidation (M)	1894.86	1.5	948.436	2	33660	2408	2425
trypsin	K.TADDC(+57.02)HASGM(+15.99)IFILGGSK.E	Carbamidomethylation; Oxidation (M)	1894.86	1.7	632.627	3	31668	2408	2425
Glu-C	H.ASGMIFILGGSK.E	non-specific cleavage	1179.63	0.6	590.824	2	42506	2414	2425
LEP	H.ASGMIFILGGSK.E	non-specific cleavage	1179.63	-0.5	590.823	2	45986	2414	2425
trypsin	H.ASGM(+15.99)IFILGGSK.E	Oxidation (M), non-specific cleavage	1195.63	3.5	598.823	2	35604	2414	2425
trypsin	H.ASGM(+15.99)IFILGGSK.E	Oxidation (M), non-specific cleavage	1195.63	3.5	598.823	2	35604	2414	2425
Glu-C	A.SGMIFILGGSK.E	non-specific cleavage	1108.6	-0.7	555.304	2	42167	2415	2425
trypsin	A.SGMIFILGGSK.E	non-specific cleavage	1108.6	-2.1	555.304	2	43868	2415	2425
LEP	A.SGMIFILGGSK.E	non-specific cleavage	1108.6	1	555.305	2	45629	2415	2425
LEP	A.SGM(+15.99)IFILGGSK.E	Oxidation (M), non-specific cleavage	1124.59	0.8	563.303	2	37194	2415	2425
LEP	A.SGM(+15.99)IFILGGSK.E	Oxidation (M), non-specific cleavage	1124.59	0.8	563.303	2	37194	2415	2425
LEP	S.GMIFILGGSK.E	non-specific cleavage	1021.56	3.4	511.791	2	45424	2416	2425
LEP	S.GM(+15.99)IFILGGSK.E	Oxidation (M), non-specific cleavage	1037.56	2.2	519.787	2	37150	2416	2425
LEP	S.GM(+15.99)IFILGGSK.E	Oxidation (M), non-specific cleavage	1037.56	2.2	519.787	2	37150	2416	2425
trypsin	M.IFILGGSK.E	non-specific cleavage	833.501	0.6	417.758	2	32162	2418	2425
LEP	M.IFILGGSK.E	non-specific cleavage	833.501	0.3	417.758	2	34268	2418	2425
LEP	K.EM(+15.99)HWAYDRNFK.Y	Oxidation (M)	1511.66	0.2	756.838	2	17165	2426	2436
trypsin	K.EMHWAYDR.N		1106.46	0.2	554.237	2	16669	2426	2433
Glu-C	K.EMHWAYDR.N		1106.46	3.9	554.24	2	15665	2426	2433
LEP	K.EMHWAYDRNFK.Y		1495.67	-0.3	748.84	2	22003	2426	2436
LEP	E.MHWAYDRNFK.Y	non-specific cleavage	1366.62	-0.4	456.548	3	22019	2427	2436
Glu-C	E.M(+15.99)HWAYDR.N	Oxidation (M)	993.413	-0.3	332.145	3	8533	2427	2433
Glu-C	E.MHWAYDR.N		977.418	1.4	326.814	3	13708	2427	2433
LEP	M.HWAYDRNFK.Y	non-specific cleavage	1235.58	-1.5	412.868	3	22036	2428	2436
LEP	A.YDRNFK.Y	non-specific cleavage	841.408	0.8	421.712	2	22034	2431	2436
LEP	K.Y(-18.01)DITQALK.A	Dehydration	932.497	7.8	467.259	2	30477	2437	2444
LEP	K.YDITQALKAQ.S	non-specific cleavage	1149.6	-4.9	575.806	2	29893	2437	2446
trypsin	K.YDITQALK.A		950.507	2.2	476.262	2	28125	2437	2444
LEP	K.YDITQALK.A		950.507	1.1	476.261	2	30970	2437	2444
trypsin	K.AQSIHPEDVFDTDAPFFIK.V		2176.05	2.3	726.358	3	49739	2445	2463
LEP	K.AQSIHPEDVFDTDAPFFIK.V		2176.05	2.3	1089.03	2	51084	2445	2463
trypsin	Q.SIHPEDVFDTDAPFFIK.V	non-specific cleavage	1976.95	-0.9	659.991	3	50166	2447	2463
LEP	Q.SIHPEDVFDTDAPFFIK.V	non-specific cleavage	1976.95	0.2	989.484	2	51784	2447	2463
LEP	D.TDAPFFIK.V	non-specific cleavage	937.491	1.1	469.753	2	38115	2456	2463
Glu-C	D.TDAPFFIK.V		937.491	-0.8	469.752	2	34508	2456	2463
LEP	D.APFFIK.V	non-specific cleavage	721.416	1.9	361.716	2	32640	2458	2463
LEP	K.TALPSSAIPAPTIIYSAGEGHTDDHGSDHIA.G	non-specific cleavage	3100.47	2.3	776.127	4	43477	2472	2502
LEP	K.TALPSSAIPAPTIIYSAGEGHTDDHGS.D	non-specific cleavage	2664.27	5	889.101	3	45198	2472	2498
LEP	K.TALPSSAIPAPTIIYSAGEGHTD.D	non-specific cleavage	2268.13	0.2	757.05	3	49675	2472	2494
LEP	K.TALPSSAIPAPTIIYSAGEGH.T	non-specific cleavage	2052.05	4.2	685.028	3	50362	2472	2492
LEP	K.TALPSSAIPAPTII.Y	non-specific cleavage	1350.78	-0.2	676.395	2	54604	2472	2485
trypsin	K.TALPSSAIPAPTIIYSAGEGHTDDHGSDHIAGSGVR.K		3556.72	1.6	712.352	5	38551	2472	2507
Glu-C	K.TALPSSAIPAPTIIYSAGE.G		1857.97	2	929.995	2	49371	2472	2490
LEP	K.TALPSSAIPAPTIIYSAGEGHTDDHGSDHIAGSGVRK.D		3684.81	2.6	922.213	4	36741	2472	2508
LEP	L.PSSAIPAPTIIYSAGEGHTDDHGSDHIAGSGVRK.D	non-specific cleavage	3399.64	3.8	680.939	5	36227	2475	2508
LEP	S.SAIPAPTIIYSAGEGHTDDHGSDHIAGSGVRK.D	non-specific cleavage	3215.56	1.9	536.935	6	29116	2477	2508
trypsin	S.SAIPAPTIIYSAGEGHTDDHGSDHIAGSGVR.K	non-specific cleavage	3087.46	0	772.873	4	30706	2477	2507
LEP	I.PAPTIIYSAGEGHTDDHGSDHIAGSGVRK.D	non-specific cleavage	2944.41	-1.5	589.888	5	36241	2480	2508
LEP	A.PTIIYSAGEGHTDDHGSDHIAGSGVRK.D	non-specific cleavage	2776.32	3.8	695.089	4	37175	2482	2508
LEP	Y.SAGEGHTDDHGSDHIAGSGVRK.D	non-specific cleavage	2188.98	2	548.255	4	2518	2487	2508
Glu-C	Y.SAGEGHTDDHGSDHIAGSGVR.K	non-specific cleavage	2060.89	0.8	516.23	4	3441	2487	2507
trypsin	Y.SAGEGHTDDHGSDHIAGSGVR.K	non-specific cleavage	2060.89	-1.4	516.229	4	3591	2487	2507
Glu-C	E.GHTDDHGSDHIAGSGVR.K		1716.76	1.3	430.197	4	2780	2491	2507
LEP	D.DHGSDHIAGSGVRK.D	non-specific cleavage	1434.7	-2.8	359.68	4	2431	2495	2508
LEP	G.SDHIAGSGVRK.D	non-specific cleavage	1125.59	-1.8	376.203	3	2350	2498	2508
trypsin	R.KDVTSLTASEIENLR.H		1674.88	1.6	559.301	3	31966	2508	2522
trypsin	K.DVTS(-18.01)LTASEIENLR.H	Dehydration	1528.77	0	510.598	3	42128	2509	2522
trypsin	K.DVTSLTAS(-18.01)EIENLR.H	Dehydration	1528.77	-1.7	765.393	2	42841	2509	2522
LEP	K.DVTSLTASEIENLRH.A	non-specific cleavage	1683.84	-0.3	842.928	2	38920	2509	2523
LEP	K.DVTSLTASEIENLRHA.L	non-specific cleavage	1754.88	1.9	585.968	3	41578	2509	2524
LEP	K.DVTSLTASEIENLRHAL.Q	non-specific cleavage	1867.96	1.7	623.663	3	52825	2509	2525
LEP	K.DVTSLTASEIENLRHALQ.S	non-specific cleavage	1996.02	2.5	666.35	3	53387	2509	2526
LEP	K.DVTSLTASEIENLRHALQS.V	non-specific cleavage	2083.05	1	695.359	3	53960	2509	2527
LEP	K.DVTSLTASEIENLRHALQSVM.D	non-specific cleavage	2313.16	0.8	772.062	3	55327	2509	2529
LEP	K.DVTSLTASEIENLRHALQSVMDDDGPNGFQAIAAYHGSPPM.C	non-specific cleavage	4354.03	3	1089.52	4	55343	2509	2549
LEP	K.DVTSLTASEIENLRHALQSVMDDDGPNGFQA.I	non-specific cleavage	3329.55	7.6	1110.86	3	55583	2509	2539
LEP	K.DVTSLTASEIENLRHALQSVM(+15.99)DDDGPNGFQAIAAYHGSPPMC(+57.02).H	Oxidation (M); Carbamidomethylation, non-specific cleavage	4530.05	3.5	1133.52	4	54747	2509	2550
LEP	K.DVTSLTASEIENLRHALQSVM(+15.99)DDDGPNGFQAIAAYHGSPPMC(+57.02).H	Oxidation (M); Carbamidomethylation, non-specific cleavage	4530.05	3.5	1133.52	4	54747	2509	2550
trypsin	K.DVTSLTASEIENLR.H		1546.78	-0.3	774.399	2	42870	2509	2522
Glu-C	K.DVTSLTASEIENLR.H		1546.78	1.8	774.401	2	40657	2509	2522
LEP	V.TSLTASEIENLRH.A	non-specific cleavage	1469.75	-2.6	735.879	2	38949	2511	2523
LEP	T.SLTASEIENLRH.A	non-specific cleavage	1368.7	3.1	685.359	2	25334	2512	2523
trypsin	T.SLTASEIENLR.H	non-specific cleavage	1231.64	0.5	616.828	2	28980	2512	2522
LEP	T.SLTASEIENLR.H	non-specific cleavage	1231.64	3.2	616.83	2	31054	2512	2522
trypsin	S.LTASEIENLR.H	non-specific cleavage	1144.61	1.5	573.312	2	27322	2513	2522
LEP	S.LTASEIENLRH.A	non-specific cleavage	1281.67	1	641.842	2	38983	2513	2523
trypsin	T.ASEIENLR.H	non-specific cleavage	930.477	-2.6	466.245	2	42211	2515	2522
LEP	R.HALQSVMDDDGPNGFQA.I	non-specific cleavage	1800.77	9.2	901.402	2	33297	2523	2539
LEP	R.HALQSVMDDDGPNGFQAIA.A	non-specific cleavage	1984.89	-2.8	993.452	2	41645	2523	2541
LEP	R.HALQSVMDDDGPNGFQAIAAYHGSPPM(+15.99)C(+57.02).H	Oxidation (M); Carbamidomethylation, non-specific cleavage	3001.28	-1	1001.43	3	41712	2523	2550
LEP	R.HALQSVMDDDGPNGFQAIAAYHGSPPM(+15.99)C(+57.02).H	Oxidation (M); Carbamidomethylation, non-specific cleavage	3001.28	-1	1001.43	3	41712	2523	2550
LEP	H.ALQSVMDDDGPNGFQAIA.A	non-specific cleavage	1847.84	1	924.926	2	47955	2524	2541
LEP	H.ALQSVM(+15.99)DDDGPNGFQAIA.A	Oxidation (M), non-specific cleavage	1863.83	-0.5	932.922	2	41646	2524	2541
LEP	H.ALQSVM(+15.99)DDDGPNGFQAIA.A	Oxidation (M), non-specific cleavage	1863.83	-0.5	932.922	2	41646	2524	2541
LEP	H.GMASFPHWHR.L	non-specific cleavage	1224.56	-1.8	409.193	3	21615	2563	2572
trypsin	H.GMASFPHWHR.L	non-specific cleavage	1224.56	4.4	613.29	2	24479	2563	2572
trypsin	H.GM(+15.99)ASFPHWHR.L	Oxidation (M), non-specific cleavage	1240.56	1.7	414.527	3	14333	2563	2572
trypsin	H.GM(+15.99)ASFPHWHR.L	Oxidation (M), non-specific cleavage	1240.56	1.7	414.527	3	14333	2563	2572
trypsin	M.ASFPHWHR.L	non-specific cleavage	1036.5	2.3	519.258	2	12974	2565	2572
LEP	M.ASFPHWHR.L	non-specific cleavage	1036.5	0.4	519.257	2	15407	2565	2572
LEP	A.SFPHWHR.L	non-specific cleavage	965.462	2.1	322.829	3	13426	2566	2572
LEP	H.RLFVK.Q	non-specific cleavage	661.428	2.3	331.722	2	14372	2572	2576
Glu-C	K.QMEDALAAHGAH.I	non-specific cleavage	1249.55	0.5	625.783	2	10364	2577	2588
trypsin	K.QMEDALAAHGAH.I	non-specific cleavage	1249.55	2.3	625.784	2	11327	2577	2588
LEP	K.QMEDALAAHGA.H	non-specific cleavage	1112.49	2.2	557.255	2	18995	2577	2587
trypsin	K.QM(+15.99)EDALAAHGAH.I	Oxidation (M), non-specific cleavage	1265.55	1.4	422.856	3	10195	2577	2588
Glu-C	K.QM(+15.99)EDALAAHGAH.I	Oxidation (M), non-specific cleavage	1265.55	-0.2	422.856	3	5369	2577	2588
Glu-C	K.QM(+15.99)EDALAAHGAH.I	Oxidation (M), non-specific cleavage	1265.55	-0.2	422.856	3	5369	2577	2588
trypsin	K.QM(+15.99)EDALAAHGAH.I	Oxidation (M), non-specific cleavage	1265.55	1.4	422.856	3	10195	2577	2588
Glu-C	Q.MEDALAAHGAH.I	non-specific cleavage	1121.49	-0.8	561.753	2	10439	2578	2588
trypsin	H.IGIPYWDWTSAFSHLPALVTDHEHNPFHHGH.I	non-specific cleavage	3617.7	-2.2	724.546	5	50627	2589	2619
trypsin	N.PFHHGHIAHR.N	non-specific cleavage	1207.61	2	302.911	4	2314	2614	2623
trypsin	R.DM(+15.99)LFNDPEHGSESFFYR.Q	Oxidation (M)	2105.88	1.9	702.968	3	41982	2633	2649
trypsin	R.DMLFNDPEHGSESFFYR.Q		2089.88	-1	1045.95	2	43713	2633	2649
Glu-C	R.DMLFNDPEHGSE.S		1389.55	0.6	695.783	2	31017	2633	2644
trypsin	L.FNDPEHGSESFFYR.Q	non-specific cleavage	1730.73	-1.7	866.372	2	43758	2636	2649
trypsin	F.NDPEHGSESFFYR.Q	non-specific cleavage	1583.66	-3	792.837	2	43767	2637	2649
trypsin	P.EHGSESFFYR.Q	non-specific cleavage	1257.54	4.8	420.19	3	19070	2640	2649
Glu-C	E.ITHNAIHSWTGGHTPYGMSSLE.Y		2395.1	1.1	599.783	4	25318	2669	2690
trypsin	H.NAIHSWTGGHTPYGMSSLEYTAYDPLFYLHHSNTDR.I	non-specific cleavage	4137.87	1.7	828.583	5	44269	2672	2707
trypsin	N.AIHSWTGGHTPYGMSSLEYTAYDPLFYLHHSNTDR.I	non-specific cleavage	4023.83	0.8	805.773	5	43997	2673	2707
trypsin	H.TPYGMSSLEYTAYDPLFYLHHSNTDR.I	non-specific cleavage	3077.39	1.3	770.355	4	48965	2682	2707
trypsin	Y.GMSSLEYTAYDPLFYLHHSNTDR.I	non-specific cleavage	2716.22	0.5	680.063	4	45481	2685	2707
trypsin	Y.GMSSLEYTAYDPLFYLHH.S	non-specific cleavage	2142.97	-3.9	715.328	3	50577	2685	2702
trypsin	Y.GMSSLEYTAYDPLFYLH.H	non-specific cleavage	2005.91	3.5	1003.97	2	51405	2685	2701
trypsin	M.SSLEYTAYDPLFYLHHSNTDR.I	non-specific cleavage	2528.16	8.2	843.734	3	42469	2687	2707
trypsin	M.SSLEYTAYDPLFYLHH.S	non-specific cleavage	1954.91	2.6	652.646	3	49845	2687	2702
LEP	M.SSLEYTAYDPLFYLHH.S	non-specific cleavage	1954.91	-1.4	652.643	3	51284	2687	2702
trypsin	S.SLEYTAYDPLFYLHHSNTDR.I	non-specific cleavage	2441.13	2.3	611.291	4	42542	2688	2707
trypsin	S.SLEYTAYDPLFYLHH.S	non-specific cleavage	1867.88	0.8	623.634	3	49940	2688	2702
trypsin	S.SLEYTAYDPLFYLH.H	non-specific cleavage	1730.82	3.7	866.42	2	51226	2688	2701
LEP	S.SLEYTAYDPLFYLHH.S	non-specific cleavage	1867.88	-1.6	934.945	2	51411	2688	2702
trypsin	L.EYTAYDPLFYLHHSNTDR.I	non-specific cleavage	2241.01	-0.5	561.26	4	38057	2690	2707
LEP	L.EYTAYDPLFYLHH.S	non-specific cleavage	1667.76	2.7	556.929	3	47253	2690	2702
Glu-C	E.YTAYDPLFYLH.H	non-specific cleavage	1401.66	-0.2	701.837	2	47833	2691	2701
Glu-C	E.YTAYDPLFYLHHSNTDR.I		2111.97	2.4	529.001	4	34643	2691	2707
trypsin	Y.TAYDPLFYLHHSNTDR.I	non-specific cleavage	1948.91	2.3	488.235	4	33257	2692	2707
Glu-C	Y.TAYDPLFYLHHSNTDR.I	non-specific cleavage	1948.91	0.5	650.643	3	34474	2692	2707
Glu-C	T.AYDPLFYLHHSNTDR.I	non-specific cleavage	1847.86	-0.4	616.96	3	34473	2693	2707
trypsin	A.YDPLFYLHHSNTDR.I	non-specific cleavage	1776.82	1	593.282	3	30487	2694	2707
Glu-C	A.YDPLFYLHHSNTDR.I	non-specific cleavage	1776.82	-1.1	593.281	3	31554	2694	2707
LEP	K.YRGFQYN(-17.03)AAHC(+57.02)DIQVLK.Q	Ammonia-loss (N); Carbamidomethylation	2064.98	-1.8	517.252	4	27942	2718	2734
LEP	K.YRGFQYNAAHC(+57.02)DIQVLK.Q	Carbamidomethylation	2082.01	0.4	521.51	4	28058	2718	2734
trypsin	R.GFQYN(-17.03)AAHC(+57.02)DIQVLK.Q	Ammonia-loss (N); Carbamidomethylation	1745.82	3.9	582.949	3	28099	2720	2734
trypsin	R.GFQYNAAHC(+57.02)DIQVLK.Q	Carbamidomethylation	1762.85	0.1	882.43	2	28025	2720	2734
Glu-C	R.GFQYNAAHC(+57.02)DIQVLK.Q	Carbamidomethylation	1762.85	3.6	882.433	2	26750	2720	2734
LEP	R.GFQYNAAHC(+57.02)DIQVLK.Q	Carbamidomethylation, non-specific cleavage	1762.85	0.5	882.431	2	30189	2720	2734
LEP	F.QYNAAHC(+57.02)DIQVLK.Q	Carbamidomethylation, non-specific cleavage	1558.76	1	520.593	3	21413	2722	2734
trypsin	F.QYNAAHC(+57.02)DIQVLK.Q	Carbamidomethylation, non-specific cleavage	1558.76	4	780.389	2	28040	2722	2734
LEP	Q.YNAAHC(+57.02)DIQVLK.Q	Carbamidomethylation, non-specific cleavage	1430.7	3.8	716.359	2	27943	2723	2734
trypsin	Q.YNAAHC(+57.02)DIQVLK.Q	Carbamidomethylation, non-specific cleavage	1430.7	2.1	716.358	2	28158	2723	2734
LEP	Y.NAAHC(+57.02)DIQVLK.Q	Carbamidomethylation, non-specific cleavage	1267.63	3.7	634.827	2	30769	2724	2734
trypsin	Y.NAAHC(+57.02)DIQVLK.Q	Carbamidomethylation, non-specific cleavage	1267.63	0.5	634.825	2	31613	2724	2734
LEP	N.AAHC(+57.02)DIQVLK.Q	Carbamidomethylation, non-specific cleavage	1153.59	0.9	577.803	2	27925	2725	2734
LEP	A.AHC(+57.02)DIQVLK.Q	Carbamidomethylation, non-specific cleavage	1082.55	0.1	361.859	3	16103	2726	2734
LEP	A.HC(+57.02)DIQVLK.Q	Carbamidomethylation, non-specific cleavage	1011.52	1.1	506.766	2	16204	2727	2734
Glu-C	H.C(+57.02)DIQVLK.Q	Carbamidomethylation, non-specific cleavage	874.458	-0.9	438.236	2	18593	2728	2734
LEP	C.DIQVLK.Q	non-specific cleavage	714.428	-0.8	358.221	2	22530	2729	2734
Glu-C	D.IQVLK.Q		599.401	-0.3	300.707	2	11890	2730	2734
trypsin	K.QPLKPFSESR.N		1187.63	-0.1	396.884	3	13058	2735	2744
LEP	K.PFSESRNPNPVTRAN.S	non-specific cleavage	1684.83	-4.2	843.418	2	24441	2739	2753
LEP	P.FSESRNPNPVTRAN.S	non-specific cleavage	1587.78	-0.1	794.895	2	13633	2740	2753
LEP	F.SESRNPNPVTRAN.S	non-specific cleavage	1440.71	4.3	721.364	2	19134	2741	2753
LEP	R.ANSRAVDSFDYERLNYQYDTLTFHGHSISELDAMLQERK.K	non-specific cleavage	4619.18	-0.2	924.842	5	45770	2752	2790
LEP	A.NSRAVDSFDYERLNYQYDTLTFHGHSISELDAMLQERK.K	non-specific cleavage	4548.14	-1.6	759.029	6	45885	2753	2790
LEP	N.SRAVDSFDYERLNYQYDTLTFHGHSIS.E	non-specific cleavage	3220.48	2.1	645.106	5	38820	2754	2780
LEP	N.SRAVDSFDYERLNYQYDTLT.F	non-specific cleavage	2455.13	2.4	819.386	3	39328	2754	2773
LEP	N.SRAVDSFDYERLNYQYDTLTFHGHSISELDAMLQERK.K	non-specific cleavage	4434.1	0.4	1109.53	4	45886	2754	2790
LEP	N.SRAVDSFDYERLNYQYDTLTFHGHSISELDAM(+15.99)LQERK.K	Oxidation (M), non-specific cleavage	4450.09	-1.2	891.025	5	41948	2754	2790
LEP	N.SRAVDSFDYERLNYQYDTLTFHGHSISELDAM(+15.99)LQERK.K	Oxidation (M), non-specific cleavage	4450.09	-1.2	891.025	5	41948	2754	2790
trypsin	R.AVDS(-18.01)FDYER.L	Dehydration	1082.47	-0.9	542.24	2	18062	2756	2764
LEP	R.AVDSFDYERLNYQYDTLTFHGHSIS.E	non-specific cleavage	2977.35	1.1	745.346	4	42435	2756	2780
LEP	R.AVDSFDYERLNYQYDTLTFHGHSISELDAMLQERK.K	non-specific cleavage	4190.96	4.8	1048.75	4	48266	2756	2790
trypsin	R.AVDSFDYER.L		1100.48	0.9	551.246	2	18099	2756	2764
Glu-C	R.AVDSFDYER.L		1100.48	1.3	551.247	2	17010	2756	2764
trypsin	V.DSFDYER.L	non-specific cleavage	930.372	-1.3	466.193	2	18087	2758	2764
trypsin	R.LNYQYDTLTFHGH.S	non-specific cleavage	1607.74	-2.1	804.874	2	28699	2765	2777
trypsin	R.LNYQYDTLTFH.G	non-specific cleavage	1413.66	0.2	707.836	2	36398	2765	2775
LEP	R.LNYQYDTLTFHGHSISELDAMLQERK.K	non-specific cleavage	3108.5	1.7	778.133	4	44609	2765	2790
LEP	R.LNYQYDTLTFHGHSISELDAMLQER.K	non-specific cleavage	2980.4	2.3	746.11	4	47994	2765	2789
trypsin	R.LNYQYDTLTFHGHSISELDAM(+15.99)LQER.K	Oxidation (M)	2996.4	0.5	999.807	3	40443	2765	2789
LEP	R.LNYQYDTLTFHGHSISELDAM(+15.99)LQERK.K	Oxidation (M), non-specific cleavage	3124.49	2.3	625.907	5	39171	2765	2790
LEP	R.LNYQYDTLTFHGHSISELDAM(+15.99)LQERK.K	Oxidation (M), non-specific cleavage	3124.49	2.3	625.907	5	39171	2765	2790
trypsin	R.LNYQYDTLTFHGHSISELDAMLQER.K		2980.4	0.2	994.475	3	46345	2765	2789
Glu-C	R.LNYQYDTLTFHGHSISE.L		2023.93	0.1	1012.97	2	30373	2765	2781
LEP	N.YQYDTLTFHGHSISELDAMLQERK.K	non-specific cleavage	2881.37	-0.3	577.281	5	43028	2767	2790
LEP	Y.DTLTFHGHSISELDAMLQERK.K	non-specific cleavage	2427.19	2	607.805	4	40870	2770	2790
LEP	D.TLTFHGHSISELDAMLQERK.K	non-specific cleavage	2312.16	0.9	579.047	4	38041	2771	2790
LEP	L.TFHGHSISELDAMLQERK.K	non-specific cleavage	2098.03	2.3	525.515	4	30500	2773	2790
LEP	T.FHGHSISELDAMLQERK.K	non-specific cleavage	1996.98	1.9	666.668	3	29775	2774	2790
LEP	T.FHGHSISELDAM(+15.99)LQERK.K	Oxidation (M), non-specific cleavage	2012.97	1.7	504.252	4	21699	2774	2790
LEP	T.FHGHSISELDAM(+15.99)LQERK.K	Oxidation (M), non-specific cleavage	2012.97	1.7	504.252	4	21699	2774	2790
LEP	H.SISELDAMLQERK.K	non-specific cleavage	1518.77	3.1	760.395	2	35140	2778	2790
Glu-C	H.SISELDAMLQER.K	non-specific cleavage	1390.68	1.8	696.347	2	38880	2778	2789
trypsin	H.SISELDAMLQER.K	non-specific cleavage	1390.68	0.2	696.346	2	40710	2778	2789
trypsin	H.SISELDAM(+15.99)LQER.K	Oxidation (M), non-specific cleavage	1406.67	-0.2	704.343	2	27764	2778	2789
LEP	H.SISELDAM(+15.99)LQERK.K	Oxidation (M), non-specific cleavage	1534.77	1.1	512.597	3	24506	2778	2790
LEP	H.SISELDAM(+15.99)LQERK.K	Oxidation (M), non-specific cleavage	1534.77	1.1	512.597	3	24506	2778	2790
trypsin	H.SISELDAM(+15.99)LQER.K	Oxidation (M), non-specific cleavage	1406.67	-0.2	704.343	2	27764	2778	2789
LEP	I.SELDAMLQERK.K	non-specific cleavage	1318.65	-2.1	660.333	2	35208	2780	2790
trypsin	S.ELDAMLQER.K	non-specific cleavage	1103.53	-1.1	552.771	2	24911	2781	2789
LEP	S.ELDAMLQER.K	non-specific cleavage	1103.53	2.2	552.773	2	27162	2781	2789
LEP	E.LDAMLQERK.K	non-specific cleavage	1102.58	1	552.298	2	20721	2782	2790
Glu-C	E.LDAM(+15.99)LQER.K	Oxidation (M)	990.48	-0.8	496.247	2	12998	2782	2789
Glu-C	E.LDAMLQER.K		974.486	2	488.251	2	17567	2782	2789
trypsin	R.TFAAFLLHGFGA.S	non-specific cleavage	1250.64	1.5	626.331	2	51404	2795	2806
trypsin	R.TFAAFLLHGF.G	non-specific cleavage	1122.59	2.5	562.302	2	51493	2795	2804
LEP	R.TFAAFLLHGFGA.S	non-specific cleavage	1250.64	0	626.33	2	54730	2795	2806
Glu-C	R.TFAAFLLHGFGASAD.V		1523.74	-0.3	762.878	2	49646	2795	2809
LEP	A.FAGTFAVLGGELEMPWSFER.L	non-specific cleavage	2243.07	3.7	1122.55	2	55248	2823	2842
Glu-C	F.AGTFAVLGGELEM(+15.99)PWSFER.L	Oxidation (M), non-specific cleavage	2112	1	1057.01	2	49338	2824	2842
Glu-C	F.AGTFAVLGGELEM(+15.99)PWSFER.L	Oxidation (M), non-specific cleavage	2112	1	1057.01	2	49338	2824	2842
Glu-C	F.AVLGGELEMPWSFER.L	non-specific cleavage	1719.83	-0.2	860.922	2	49079	2828	2842
trypsin	F.AVLGGELEM(+15.99)PWSFER.L	Oxidation (M), non-specific cleavage	1735.82	0.1	868.919	2	46140	2828	2842
Glu-C	F.AVLGGELEM(+15.99)PWSFER.L	Oxidation (M), non-specific cleavage	1735.82	2	868.921	2	44091	2828	2842
Glu-C	F.AVLGGELEM(+15.99)PWSFER.L	Oxidation (M), non-specific cleavage	1735.82	2	868.921	2	44091	2828	2842
trypsin	F.AVLGGELEM(+15.99)PWSFER.L	Oxidation (M), non-specific cleavage	1735.82	0.1	868.919	2	46140	2828	2842
trypsin	A.VLGGELEMPWSFER.L	non-specific cleavage	1648.79	0.4	825.404	2	50678	2829	2842
trypsin	L.GGELEM(+15.99)PWSFER.L	Oxidation (M), non-specific cleavage	1452.63	2.3	727.326	2	36608	2831	2842
trypsin	L.GGELEM(+15.99)PWSFER.L	Oxidation (M), non-specific cleavage	1452.63	2.3	727.326	2	36608	2831	2842
Glu-C	E.LEM(+15.99)PWSFER.L	Oxidation (M)	1209.55	1.6	605.783	2	32292	2834	2842
Glu-C	E.LEMPWSFER.L		1193.55	-0.6	597.784	2	43449	2834	2842
Glu-C	E.M(+15.99)PWSFER.L	Oxidation (M)	967.422	-0.3	484.718	2	28470	2836	2842
Glu-C	E.MPWSFER.L		951.427	1.3	476.721	2	31062	2836	2842
Glu-C	M.PWSFER.L	non-specific cleavage	820.387	-0.7	411.2	2	30678	2837	2842
LEP	R.LFRYDITK.V	non-specific cleavage	1054.58	2.7	352.535	3	24119	2843	2850
LEP	L.FRYDITK.V	non-specific cleavage	941.497	0.9	471.756	2	23135	2844	2850
LEP	K.QMNLHYDSEFHFELK.I		1936.88	1.1	646.634	3	38318	2854	2868
LEP	M.NLHYDSEFHFELK.I	non-specific cleavage	1677.78	3.4	560.269	3	34457	2856	2868
trypsin	K.IVGTDGTELPSDR.I		1358.67	-0.5	680.341	2	19022	2869	2881
LEP	K.IVGTDGTELPSDRIK.S		1599.85	0.3	800.931	2	23323	2869	2883
LEP	K.EVGSLSLDEANDLK.N		1488.73	2.8	745.375	2	33722	2915	2928
LEP	S.LSLDEANDLK.N	non-specific cleavage	1116.57	2.1	559.292	2	27339	2919	2928
LEP	L.SLDEANDLK.N	non-specific cleavage	1003.48	2.6	502.75	2	14618	2920	2928
Glu-C	E.SIAGYHGYPFLC(+57.02)PE.H	Carbamidomethylation	1609.72	-0.3	805.869	2	40325	2945	2958
LEP	K.EHGSHLGIPYWDWTK.S		1824.86	-0.7	609.293	3	39769	2991	3005
LEP	H.GSHLGIPYWDWTK.S	non-specific cleavage	1558.76	-3	520.591	3	44128	2993	3005
LEP	K.SMIALPAFFADSSNSNPFYK.Y		2206.04	0.3	736.354	3	54841	3006	3025
LEP	A.FFADSSNSNPFYK.Y	non-specific cleavage	1522.67	0.2	762.344	2	35764	3013	3025
LEP	K.YHIM(+15.99)K.A	Oxidation (M)	706.347	-0.9	354.181	2	4241	3026	3030
LEP	K.YHIMK.A		690.352	-1.6	346.183	2	6161	3026	3030
Glu-C	E.ILHNAVHLWLGGT(-18.01)E.T	Dehydration	1540.82	0.3	514.612	3	34516	3077	3090
Glu-C	E.ILHNAVHLWLGGTE.T		1558.83	0.1	780.42	2	34282	3077	3090
Glu-C	A.FSAYDPVFMILHSGLDR.L	non-specific cleavage	1966.96	-0.8	984.487	2	50023	3099	3115
Glu-C	A.FSAYDPVFM(+15.99)ILHSGLDR.L	Oxidation (M), non-specific cleavage	1982.96	-0.8	992.484	2	49623	3099	3115
Glu-C	A.FSAYDPVFM(+15.99)ILHSGLDR.L	Oxidation (M), non-specific cleavage	1982.96	-0.8	992.484	2	49623	3099	3115
Glu-C	F.SAYDPVFMILHSGLDR.L	non-specific cleavage	1819.89	-0.4	607.638	3	49243	3100	3115
Glu-C	F.SAYDPVFMILH.S	non-specific cleavage	1291.63	-0.7	646.82	2	49449	3100	3110
trypsin	F.SAYDPVFMILHSGLDR.L	non-specific cleavage	1819.89	0.2	607.638	3	50874	3100	3115
trypsin	F.SAYDPVFM(+15.99)ILHSGLDR.L	Oxidation (M), non-specific cleavage	1835.89	0.8	612.97	3	49978	3100	3115
trypsin	F.SAYDPVFM(+15.99)ILHSGLDR.L	Oxidation (M), non-specific cleavage	1835.89	0.8	612.97	3	49978	3100	3115
trypsin	D.PVFMILHSGLDR.L	non-specific cleavage	1383.73	-4.5	692.871	2	51494	3104	3115
trypsin	K.C(+57.02)AGHMMDEPLHPFNYESANHDSFTR.A	Carbamidomethylation	2962.22	1.8	593.453	5	28317	3136	3160
LEP	K.C(+57.02)AGHMMDEPLHPFNYESANHDSFTR.A	Carbamidomethylation, non-specific cleavage	2962.22	0.7	593.452	5	30227	3136	3160
LEP	K.C(+57.02)AGHMMDEPLHPFN(-17.03)YESANHDSFTRANAK.P	Carbamidomethylation; Ammonia-loss (N)	3329.41	1.2	666.89	5	33581	3136	3164
LEP	K.PSTVFDSHK.F		1016.49	0.8	339.838	3	9042	3165	3173
trypsin	R.GN(-17.03)SIQEISAIIHDLR.N	Ammonia-loss (N)	1647.86	2.5	824.938	2	51781	3185	3199
trypsin	R.GNSIQEISAIIHDLR.N		1664.88	-2.8	833.447	2	50489	3185	3199
trypsin	N.SIQEISAIIHDLR.N	non-specific cleavage	1493.82	-0.9	498.947	3	47025	3187	3199
Glu-C	E.ISAIIHDLR.N		1036.6	-0.3	519.309	2	21696	3191	3199
Glu-C	I.SAIIHDLR.N	non-specific cleavage	923.519	0.3	462.767	2	21697	3192	3199
LEP	F.AGFVLSGIYTSANVK.I	non-specific cleavage	1525.81	2.6	763.916	2	44365	3206	3220
Glu-C	F.VLSGIYTSANVK.I	non-specific cleavage	1250.69	-0.6	626.35	2	23070	3209	3220
trypsin	F.VLSGIYTSANVK.I	non-specific cleavage	1250.69	-0.4	626.351	2	24266	3209	3220
LEP	F.VLSGIYTSANVK.I	non-specific cleavage	1250.69	2.7	626.352	2	26533	3209	3220
LEP	K.IYLVREGHDDENVGSFVVLGGPK.E		2499.28	0.2	834.099	3	40259	3221	3243
trypsin	R.EGHDDENVGSFVVLGGPK.E		1854.87	0.8	619.299	3	34011	3226	3243
Glu-C	R.EGHDDENVGSFVVLGGPK.E		1854.87	-1.4	619.298	3	32560	3226	3243
Glu-C	E.NVGSFVVLGGPK.E		1172.66	-1.3	587.334	2	34582	3232	3243
LEP	K.EMPWAYER.I	non-specific cleavage	1080.47	1.3	541.243	2	31397	3244	3251
LEP	K.EMPWAYERIFK.Y		1468.72	2	735.367	2	42728	3244	3254
trypsin	R.LNM(+15.99)HHDDTFNFR.L	Oxidation (M)	1561.67	2.6	521.566	3	14463	3264	3275
trypsin	R.LNMHHDDTFNFR.L		1545.68	3.5	516.235	3	19523	3264	3275
Glu-C	R.LNMHHDDTFNFR.L		1545.68	1.5	516.234	3	18561	3264	3275
trypsin	N.MHHDDTFNFR.L	non-specific cleavage	1318.55	-0.1	440.524	3	13662	3266	3275
trypsin	N.M(+15.99)HHDDTFNFR.L	Oxidation (M), non-specific cleavage	1334.55	0.9	445.856	3	12744	3266	3275
trypsin	N.M(+15.99)HHDDTFNFR.L	Oxidation (M), non-specific cleavage	1334.55	0.9	445.856	3	12744	3266	3275
trypsin	M.HHDDTFNFR.L	non-specific cleavage	1187.51	-0.9	594.762	2	13601	3267	3275
trypsin	R.LEVQSYTGEMVTHHLPEPLIIYR.P		2724.39	1	682.107	4	44750	3276	3298
trypsin	R.LEVQSYTGEMVTHHLPEPLIIYRPAK.Q		3020.58	-1.3	756.151	4	41703	3276	3301
Glu-C	E.MVTHHLPEPLIIYR.P		1717.93	1.3	573.653	3	30598	3285	3298
LEP	H.HLPEPLIIYRPAK.Q	non-specific cleavage	1545.9	0	516.308	3	32787	3289	3301
LEP	K.Q(-17.03)EYDVLVIPLGSGHK.L	Pyro-glu from Q	1636.85	2.6	819.432	2	52628	3302	3316
LEP	K.QEYDVLVIPLGSGHK.L		1653.87	1.3	827.945	2	43238	3302	3316
Glu-C	E.YDVLVIPLGSGHK.L		1396.77	0.8	466.598	3	38476	3304	3316
trypsin	N.GYELDHAYSLR.D	non-specific cleavage	1322.63	2.6	662.322	2	22648	3363	3373
trypsin	Y.ELDHAYSLR.D	non-specific cleavage	1102.54	-0.6	552.277	2	14231	3365	3373
LEP	Y.ELDHAYSLRDGHYYIAGPTK.D	non-specific cleavage	2305.11	0.8	577.286	4	25113	3365	3384
Glu-C	E.LDHAYSLR.D		973.498	-0.4	325.507	3	10666	3366	3373
Glu-C	L.DHAYSLR.D	non-specific cleavage	860.414	0.6	431.215	2	9924	3367	3373
Glu-C	D.HAYSLR.D		745.387	1	373.701	2	9969	3368	3373
LEP	H.AYSLRDGHYYIAGPTK.D	non-specific cleavage	1810.9	3.1	604.643	3	22894	3369	3384
LEP	Y.SLRDGHYYIAGPTK.D	non-specific cleavage	1576.8	0.2	395.207	4	18044	3371	3384
LEP	S.LRDGHYYIAGPTK.D	non-specific cleavage	1489.77	-0.2	373.449	4	15277	3372	3384
LEP	L.RDGHYYIAGPTK.D	non-specific cleavage	1376.68	2.8	459.903	3	11522	3373	3384
trypsin	R.D(-18.01)GHYYIAGPTK.D	Dehydration	1202.57	0.9	401.865	3	12954	3374	3384
trypsin	R.DGHYYIAGPTK.D		1220.58	-1.1	611.298	2	16744	3374	3384
trypsin	D.GHYYIAGPTK.D	non-specific cleavage	1105.56	-1.3	553.784	2	15047	3375	3384
LEP	H.YYIAGPTK.D	non-specific cleavage	911.475	0.4	456.745	2	18278	3377	3384
trypsin	R.IHIHIEDE	non-specific cleavage	1004.49	-0.6	503.253	2	16380	3394	3401
Glu-C	R.IHIHIEDE		1004.49	0.9	503.254	2	16416	3394	3401

## Sheet: Table SIII
Table SIII. Identification of Lys residues modified with maleimide (K-MAL) and hydrolyzed maleimide (K-MAL-H) groups, in peptides obtained by digestion of KLH-Cys1pP0 conjugates with Lys-C.
Protein Group	Protein ID	Protein Accession	Peptide	Unique	-10lgP	Mass	Length	ppm	m/z	z	RT	Area Sample 1	Fraction	Source File	#Feature	#Feature Sample 1	Scan	K site	Start	End	PTM
2	1	KLH_1	E(+169.04)NLVRK.S	Y	45.64	926.482	6	1	464.249	2	21.35	0	1	20180718_QX7_JRW_SA_L_II30.raw	0	0	15281	Nt	1	6	K-MAL-H
2	1	KLH_1	K.AHTNYWYRGNIDFLDK(+169.04)K.T	Y	65.09	2309.09	17	1.2	578.28	4	39.69	0	1	20180718_QX7_JRW_SA_L_II30.raw	0	0	37905	133	118	134	K-MAL-H
2	1	KLH_1	N.RAVDDRLFEK(+169.04)VK(+169.04)PGQHTHLMESVLDALEQDEFC(+57.02)K.F	Y	67.11	4378.06	34	-9.3	1095.51	4	45.75	0	1	20180718_QX7_JRW_SA_L_II30.raw	0	0	44866	146, 148	137	170	K-MAL-H; Carbamidomethylation
2	1	KLH_1	K.MGMK(+169.04)LDGHYTVK.A	Y	59.46	1547.71	12	0.1	774.863	2	34.66	0	1	20180718_QX7_JRW_SA_L_II30.raw	0	0	32035	372	385	396	K-MAL-H
2	1	KLH_1	K.GFTDPPVK(+151.03)HHQSANLLVRK.N	Y	45.54	2294.19	19	0.9	574.556	4	28.8	0	1	20180718_QX7_JRW_SA_L_II30.raw	0	0	25164	415	424	442	K-MAL
2	1	KLH_1	H.C(+57.02)AISLEHM(+15.99)HLK(+169.04)PFAFSSPLNNNEK.T	Y	59.8	2968.39	24	2.3	743.105	4	46.54	0	1	20180718_QX7_JRW_SA_L_II30.raw	0	0	43049	668	669	692	Carbamidomethylation; Oxidation (M); K-MAL-H
2	1	KLH_1	H.MHLK(+169.04)PFAFSSPLNNNEK.T	Y	71.75	2142.02	17	2.2	715.016	3	45.55	0	1	20180718_QX7_JRW_SA_L_II30.raw	0	0	44643	668	676	692	K-MAL-H
2	1	KLH_1	K.THANAMPNK(+169.04)IYDYENVLHYTYEDLTFGGISLENIEK.M	Y	100.44	4371.03	36	1.2	1093.77	4	54.52	0	1	20180718_QX7_JRW_SA_L_II30.raw	0	0	54840	690	693	728	K-MAL-H
2	1	KLH_1	K.THANAMPNK(+169.04)IYDYEN.V	Y	35.86	1948.83	15	0.8	975.421	2	39.78	0	1	20180718_QX7_JRW_SA_L_II30.raw	0	0	38013	690	693	707	K-MAL-H
2	1	KLH_1	K.AGTFAVLGGSK(+169.04)EMK.W	Y	67.28	1563.76	14	-0.3	782.887	2	35.35	0	1	20180718_QX7_JRW_SA_L_II30.raw	0	0	32839	767	768	781	K-MAL-H
2	1	KLH_1	K.AGTFAVLGGSK(+169.04)EM(+15.99)K.W	Y	63.17	1579.76	14	-0.4	790.885	2	35.11	0	1	20180718_QX7_JRW_SA_L_II30.raw	0	0	32569	767	768	781	K-MAL-H; Oxidation (M)
2	1	KLH_1	K.EMK(+169.04)WGFDRVFK.F	Y	54.19	1610.76	11	2.7	537.927	3	41.62	0	1	20180718_QX7_JRW_SA_L_II30.raw	0	0	40131	770	779	789	K-MAL-H
2	1	KLH_1	K.FDK(+169.04)VPR.S	Y	26.03	929.461	6	0.2	465.738	2	24.83	0	1	20180718_QX7_JRW_SA_L_II30.raw	0	0	20106	831	835	840	K-MAL-H
2	1	KLH_1	K.WC(+57.02)PSPEASK(+169.04)K.F	Y	49.86	1357.6	10	1.3	679.807	2	24.37	0	1	20180718_QX7_JRW_SA_L_II30.raw	0	0	19931	889	887	896	Carbamidomethylation; K-MAL-H
2	1	KLH_1	K.HNPWFDGHIDTVDK(+169.04)TTTRSVQNK.L	Y	88.64	2864.35	23	1	717.095	4	32.72	0	1	20180718_QX7_JRW_SA_L_II30.raw	0	0	29773	969	962	984	K-MAL-H
2	1	KLH_1	K.HNPWFDGHIDTVDK(+169.04)TTTR.S	Y	68.32	2308.05	18	-1.1	770.357	3	35.38	0	1	20180718_QX7_JRW_SA_L_II30.raw	0	0	32881	969	962	979	K-MAL-H
2	1	KLH_1	K.K(+151.03)LEAIK.S	Y	30.87	851.475	6	1.5	426.745	2	39.09	0	1	20180718_QX7_JRW_SA_L_II30.raw	0	0	37215	1132	1138	1143	K-MAL
2	1	KLH_1	K.K(+169.04)LEAIK.S	Y	28.8	869.486	6	3.3	435.752	2	29.99	0	1	20180718_QX7_JRW_SA_L_II30.raw	0	0	26553	1132	1138	1143	K-MAL-H
2	1	KLH_1	K.SQDRFFAGFLLSGFKK(+169.04)SSLVK.F	Y	86.69	2530.32	21	0	633.588	4	54.32	0	1	20180718_QX7_JRW_SA_L_II30.raw	0	0	54618	1153	1144	1164	K-MAL-H
2	1	KLH_1	K.YDITEK(+169.04)LHDLK.L	Y	59.39	1542.76	11	2.3	515.261	3	41.89	0	1	20180718_QX7_JRW_SA_L_II30.raw	0	0	40444	1198	1199	1209	K-MAL-H
2	1	KLH_1	L.LK(+169.04)K(+169.04)GSSVAVPYWDWTK.R	Y	27.9	2202.06	16	5.7	551.526	4	35.95	0	1	20180718_QX7_JRW_SA_L_II30.raw	0	0	33547	1333, 1344	1338	1353	K-MAL-H
2	1	KLH_1	H.SLLGGK(+169.04)GK.Y	Y	31.33	927.503	8	-0.5	464.759	2	24.93	0	1	20180718_QX7_JRW_SA_L_II30.raw	0	0	20590	1434	1435	1442	K-MAL-H
2	1	KLH_1	K.LDITK(+169.04)ALK.K	Y	33.96	1069.6	8	1.2	535.809	2	38.65	0	1	20180718_QX7_JRW_SA_L_II30.raw	0	0	36704	1609	1611	1618	K-MAL-H
2	1	KLH_1	K.DITQLDK(+169.04)RQQLSLVK.A	Y	47.1	1953.05	15	-1.9	652.024	3	38.94	0	1	20180718_QX7_JRW_SA_L_II30.raw	0	0	37035	1676	1676	1690	K-MAL-H
2	1	KLH_1	K.RQQLSLVK(+169.04)ALESMK.A	Y	73.02	1798.96	14	1.8	600.662	3	48.42	0	1	20180718_QX7_JRW_SA_L_II30.raw	0	0	47902	1684	1683	1696	K-MAL-H
2	1	KLH_1	K.RQQLSLVK(+169.04)ALESM(+15.99)K.A	Y	66.5	1814.96	14	1.2	605.994	3	40.69	0	1	20180718_QX7_JRW_SA_L_II30.raw	0	0	39065	1684	1683	1696	K-MAL-H; Oxidation (M)
2	1	KLH_1	K.HGAVVGLPYWDWTLPRSELPELLTVSTIHDPETGRDIPNPFIGSK(+169.04)IEFEGENVHTK.R	Y	71.64	6462.22	56	0	1078.04	6	54.22	0	1	20180718_QX7_JRW_SA_L_II30.raw	0	0	54506	1792	1754	1809	K-MAL-H
2	1	KLH_1	K.TPLK(+169.04)PFSFGAPYNLNDHTHDFSK.P	Y	104.23	2801.31	23	3.3	701.337	4	46.05	0	1	20180718_QX7_JRW_SA_L_II30.raw	0	0	45196	1914	1917	1939	K-MAL-H
2	1	KLH_1	K.K(+169.04)HAVPNDVFK.Y	Y	55.87	1322.66	10	0	662.338	2	26.88	0	1	20180718_QX7_JRW_SA_L_II30.raw	0	0	22500	2341	2347	2356	K-MAL-H
2	1	KLH_1	K.YELLGYRYDNLEIGGMNLHEIEK(+169.04)EIK.D	Y	56.51	3307.61	26	5.5	1103.55	3	54.01	0	1	20180718_QX7_JRW_SA_L_II30.raw	0	0	54258	2373	2357	2382	K-MAL-H
2	1	KLH_1	K.TSEDC(+57.02)HHGGQIFVLGGTK(+169.04)EM.A	Y	33.62	2371.02	20	5.7	791.352	3	41.44	0	1	20180718_QX7_JRW_SA_L_II30.raw	0	0	39929	2423	2412	2431	Carbamidomethylation; K-MAL-H
2	1	KLH_1	K.LEHELEK(+169.04)QK.E	Y	36.89	1321.65	9	1.1	661.834	2	18.89	0	1	20180718_QX7_JRW_SA_L_II30.raw	0	0	11817	2787	2787	2795	K-MAL-H
2	1	KLH_1	K.EEDRTFAAFLLHGIK(+169.04)K.S	Y	59.32	2043.04	16	3.1	682.024	3	49.12	0	1	20180718_QX7_JRW_SA_L_II30.raw	0	0	48704	2804	2796	2811	K-MAL-H
2	1	KLH_1	N.SLPNAVVDSHRFNYK(+169.04)YDNLNLHGHNIEELEEVLR.S	Y	37.64	4203.04	34	1.8	841.617	5	49.8	0	1	20180718_QX7_JRW_SA_L_II30.raw	0	0	49466	3173	3165	3198	K-MAL-H
2	1	KLH_1	N.SLPNAVVDSHRFNYK(+169.04)YDNLNLHGHNIEELEEVLRSLRLK.S	Y	32.32	4800.44	39	0.8	686.785	7	53.48	0	1	20180718_QX7_JRW_SA_L_II30.raw	0	0	53652	3173	3165	3203	K-MAL-H
2	1	KLH_1	K.FRFDLK(+169.04)K.Y	Y	27.01	1121.59	7	0.7	374.87	3	33.68	0	1	20180718_QX7_JRW_SA_L_II30.raw	0	0	30898	3275	3276	3282	K-MAL-H
2	1	KLH_1	F.RFDLK(+169.04)K(+169.04)YDHTELDASVLPAPIIVRRPNNAVFDIIEIPIGK.D	Y	69.49	4910.6	40	-3.2	819.438	6	53.63	0	1	20180718_QX7_JRW_SA_L_II30.raw	0	0	53816	3275, 3276	3277	3316	K-MAL-H
1	2	KLH_2	V(+169.04)DTVVRK.N	Y	50.3	984.524	7	0.8	493.27	2	25.45	0	1	20180718_QX7_JRW_SA_L_II30.raw	0	0	17092	N-term	1	7	K-MAL-H
1	2	KLH_2	K.ALDDLQQDDSNQGYQAIAGYHGVPTMC(+57.02)VDK(+169.04)HEK.N	Y	80.14	3871.71	33	-1.2	968.933	4	41.82	0	1	20180718_QX7_JRW_SA_L_II30.raw	0	0	40359	52	23	55	Carbamidomethylation; K-MAL-H
1	2	KLH_2	K.TSRAVDDRLFEK(+169.04)VQPGHHTRLMEGILDALEQDEFC(+57.02)K.F	Y	59.74	4409.12	36	4.3	882.835	5	52.76	0	1	20180718_QX7_JRW_SA_L_II30.raw	0	0	52841	148	137	172	K-MAL-H; Carbamidomethylation
1	2	KLH_2	K.AGDFFLLGGPTEMK(+169.04)WGFYR.A	Y	31.57	2360.09	19	0.6	1181.05	2	54.55	0	1	20180718_QX7_JRW_SA_L_II30.raw	0	0	54877	353	340	358	K-MAL-H
1	2	KLH_2	H.RPAK(+151.03)GHFDK(+169.04)PPVPVAQANLAVRK.N	Y	50.29	2815.49	23	5.2	564.108	5	28.1	0	1	20180718_QX7_JRW_SA_L_II30.raw	0	0	24338	409, 414	406	428	K-MAL; K-MAL-H
1	2	KLH_2	K.GHFDK(+151.03)PPVPVAQANLAVRK.N	Y	69.26	2194.16	19	-0.4	732.395	3	41.34	0	1	20180718_QX7_JRW_SA_L_II30.raw	0	0	39812	414	410	428	K-MAL
1	2	KLH_2	K.GHFDK(+169.04)PPVPVAQANLAVRK.N	Y	88.26	2212.18	19	0	738.399	3	41.07	0	1	20180718_QX7_JRW_SA_L_II30.raw	0	0	39506	414	410	428	K-MAL-H
1	2	KLH_2	K.GHFDK(+169.04)PPVPVAQAN.L	Y	54.27	1644.79	14	-1.7	823.401	2	39.15	0	1	20180718_QX7_JRW_SA_L_II30.raw	0	0	37285	414	410	423	K-MAL-H
1	2	KLH_2	K.GHFDK(+169.04)PPVPVAQA.N	Y	44.64	1530.75	13	2.4	766.383	2	43.12	0	1	20180718_QX7_JRW_SA_L_II30.raw	0	0	39315	414	410	422	K-MAL-H
1	2	KLH_2	K.GHFDK(+169.04)PPVPVAQANLA.V	Y	44.39	1828.91	16	-0.9	915.462	2	46.73	0	1	20180718_QX7_JRW_SA_L_II30.raw	0	0	42263	414	410	425	K-MAL-H
1	2	KLH_2	K.GHFDK(+169.04)PPVPVAQ.A	Y	34.98	1459.71	12	5.1	730.866	2	40.45	0	1	20180718_QX7_JRW_SA_L_II30.raw	0	0	37231	414	410	421	K-MAL-H
1	2	KLH_2	K.GHFDK(+169.04)PPVPVA.Q	Y	25.68	1331.65	11	-4.2	666.83	2	46.6	0	1	20180718_QX7_JRW_SA_L_II30.raw	0	0	45808	414	410	420	K-MAL-H
1	2	KLH_2	K.NINDLTAEETYSLRK(+169.04)AMERFQNDK.S	Y	61.04	3054.44	24	1.5	764.617	4	51.1	0	1	20180718_QX7_JRW_SA_L_II30.raw	0	0	50949	443	429	452	K-MAL-H
1	2	KLH_2	K.NINDLTAEETYSLRK(+169.04)AMER.F	Y	29.87	2422.14	19	3	808.391	3	44.76	0	1	20180718_QX7_JRW_SA_L_II30.raw	0	0	43746	443	429	447	K-MAL-H
1	2	KLH_2	K.AMERFQNDK(+169.04)SVDGYQATVEFHALPARC(+57.02)PRPDAK.D	Y	33.06	3972.86	33	3.7	795.583	5	34.9	0	1	20180718_QX7_JRW_SA_L_II30.raw	0	0	32325	452	444	476	K-MAL-H; Carbamidomethylation
1	2	KLH_2	Y.RGK(+151.03)PYNTANC(+57.02)AIASMRKPLQPFGLDSVINPDDETREHSVPFRVFDYK.N	Y	23.08	5586.72	47	-4.8	932.123	6	44.99	0	1	20180718_QX7_JRW_SA_L_II30.raw	0	0	44002	1064	1062	1108	K-MAL; Carbamidomethylation
1	2	KLH_2	A.SMRK(+169.04)PLQPFGLDSVINPDDETREH.S	Y	49.98	2949.39	24	1.7	738.357	4	45.02	0	1	20180718_QX7_JRW_SA_L_II30.raw	0	0	42868	1078	1075	1098	K-MAL-H
1	2	KLH_2	S.MRK(+169.04)PLQPFGLDSVINPDDETREH.S	Y	42.87	2862.36	23	-1.6	716.596	4	46.92	0	1	20180718_QX7_JRW_SA_L_II30.raw	0	0	45020	1078	1076	1098	K-MAL-H
1	2	KLH_2	K.EGIYENIAK(+169.04)FHGK.P	Y	59.8	1673.81	13	1.3	558.943	3	36.18	0	1	20180718_QX7_JRW_SA_L_II30.raw	0	0	32443	1292	1284	1296	K-MAL-H
1	2	KLH_2	K.PLQPFNNPELNSDSMTLK(+169.04)HNLPQDSFDYQNR.F	Y	97.85	3827.75	31	-1.4	957.943	4	50.54	0	1	20180718_QX7_JRW_SA_L_II30.raw	0	0	50313	1507	1490	1520	K-MAL-H
1	2	KLH_2	K.PLQPFNNPELNSDSMTLK(+169.04)HNLPQDSFDYQNRFRYQYDNLQFNHFSIQK.L	Y	75.28	6056.82	48	4.3	1010.48	6	51.33	0	1	20180718_QX7_JRW_SA_L_II30.raw	0	0	51210	1507	1490	1537	K-MAL-H
1	2	KLH_2	K.PLQPFNNPELNSDSMTLK(+169.04)H.N	Y	58.62	2350.09	19	-2.4	784.369	3	40.48	0	1	20180718_QX7_JRW_SA_L_II30.raw	0	0	38831	1507	1490	1508	K-MAL-H
1	2	KLH_2	K.AGSFTILGGETEMPFHFDRLYK(+169.04)FDITSALHK.L	Y	63.45	3696.79	31	-1.3	740.365	5	53.69	0	1	20180718_QX7_JRW_SA_L_II30.raw	0	0	53883	1605	1584	1614	K-MAL-H
1	2	KLH_2	K.FDITSALHK(+169.04)LGVPLDGHGFDIK.V	Y	75.31	2548.3	22	1.9	850.441	3	54.84	0	1	20180718_QX7_JRW_SA_L_II30.raw	0	0	54918	1614	1606	1627	K-MAL-H
1	2	KLH_2	K.EVSSLTTLEK(+169.04)HFLRK.A	Y	56.81	1956.03	15	1.3	490.016	4	44.63	0	1	20180718_QX7_JRW_SA_L_II30.raw	0	0	42402	1681	1672	1686	K-MAL-H
1	2	KLH_2	K.EVSSLTTLEK(+169.04)H.F	Y	34	1411.68	11	-0.4	706.849	2	33.24	0	1	20180718_QX7_JRW_SA_L_II30.raw	0	0	30389	1681	1672	1682	K-MAL-H
1	2	KLH_2	R.KALK(+169.04)NMQADDSPDGYQAIASFH.A	Y	65.23	2575.17	22	3.3	859.399	3	40.96	0	1	20180718_QX7_JRW_SA_L_II30.raw	0	0	38683	1689	1686	1707	K-MAL-H
1	2	KLH_2	K.PQSALPDLVTQETYEHLFSHK(+169.04)TFPNPFLK.A	Y	86.96	3552.76	29	1.4	889.198	4	54.44	0	1	20180718_QX7_JRW_SA_L_II30.raw	0	0	54750	1784	1764	1792	K-MAL-H
1	2	KLH_2	S.ALPDLVTQETYEHLFSHK(+169.04)TFPNPFLK.A	Y	95.85	3240.61	26	-0.3	811.16	4	53.99	0	1	20180718_QX7_JRW_SA_L_II30.raw	0	0	54236	1784	1767	1792	K-MAL-H
1	2	KLH_2	H.LFSHK(+169.04)TFPNPFLK.A	Y	58.16	1743.9	13	-0.2	582.307	3	46.58	0	1	20180718_QX7_JRW_SA_L_II30.raw	0	0	45785	1784	1780	1792	K-MAL-H
1	2	KLH_2	S.HK(+169.04)TFPNPFLK.A	Y	47.33	1396.71	10	-0.7	466.578	3	40.55	0	1	20180718_QX7_JRW_SA_L_II30.raw	0	0	38904	1784	1783	1792	K-MAL-H
1	2	KLH_2	K.YDITK(+169.04)TLK.D	Y	42.47	1149.59	8	2.2	575.805	2	38.71	0	1	20180718_QX7_JRW_SA_L_II30.raw	0	0	36782	2030	2026	2033	K-MAL-H
1	2	KLH_2	K.YDITKTLK(+169.04)DM(+15.99)K.L	Y	52.62	1539.75	11	-2.3	770.88	2	37.16	0	1	20180718_QX7_JRW_SA_L_II30.raw	0	0	34954	2033	2026	2036	K-MAL-H; Oxidation (M)
1	2	KLH_2	K.TLK(+169.04)DMK.L	Y	38.02	903.438	6	-0.4	452.726	2	22.58	0	1	20180718_QX7_JRW_SA_L_II30.raw	0	0	16694	2033	2031	2036	K-MAL-H
1	2	KLH_2	R.DLASLK(+169.04)SAMR.S	Y	33.04	1259.62	10	1.2	630.817	2	42.73	0	1	20180718_QX7_JRW_SA_L_II30.raw	0	0	41404	2102	2097	2106	K-MAL-H
1	2	KLH_2	A.VAIPYWDWTK(+151.03)PISK(+169.04)LPDLFTSPEYYDPWRDAVVNNPFAK.G	Y	50.1	4958.39	39	-2.4	992.683	5	53.86	0	1	20180718_QX7_JRW_SA_L_II30.raw	0	0	54089	2179, 2183	2170	2208	K-MAL; K-MAL-H
1	2	KLH_2	K.PISK(+169.04)LPDLFTSPEYYDPWRDAVVNNPFAK.G	Y	68.34	3547.73	29	9	1183.59	3	54.47	0	1	20180718_QX7_JRW_SA_L_II30.raw	0	0	54794	2183	2180	2208	K-MAL-H
1	2	KLH_2	K.LPDLFTSPEYYDPWRDAVVNNPFAK(+169.04)GYIK.S	Y	95.87	3583.73	29	2.6	1195.59	3	54.43	0	1	20180718_QX7_JRW_SA_L_II30.raw	0	0	54746	2208	2184	2212	K-MAL-H
1	2	KLH_2	K.IWAVWQALQK(+169.04)K.R	Y	65.7	1538.83	11	2.4	770.422	2	53.17	0	1	20180718_QX7_JRW_SA_L_II30.raw	0	0	53310	2308	2299	2309	K-MAL-H
1	2	KLH_2	K.ADC(+57.02)ALNMMTK(+169.04)PMRPFAHDFNHNGFTK.M	Y	53.37	3219.41	26	2	644.891	5	43.7	0	1	20180718_QX7_JRW_SA_L_II30.raw	0	0	42532	2326	2317	2342	Carbamidomethylation; K-MAL-H
1	2	KLH_2	K.TADDC(+57.02)HASGMIFILGGSK(+169.04)EMHWAYDR.N	Y	26.58	3136.35	26	5.7	1046.46	3	47.89	0	1	20180718_QX7_JRW_SA_L_II30.raw	0	0	47298	2412	2408	2433	Carbamidomethylation; K-MAL-H
1	2	KLH_2	K.EMHWAYDRNFK(+169.04)YDITQALK.A	Y	54.37	2597.2	19	5.9	650.311	4	47.87	0	1	20180718_QX7_JRW_SA_L_II30.raw	0	0	46305	2436	2426	2444	K-MAL-H
1	2	KLH_2	R.NFK(+169.04)YDITQALK(+169.04)AQSIHPEDVFDTDAPFFIK.V	Y	38.36	3835.83	30	-3.5	959.961	4	54.28	0	1	20180718_QX7_JRW_SA_L_II30.raw	0	0	54566	2436, 2444	2434	2463	K-MAL-H
1	2	KLH_2	K.YDITQALK(+169.04)AQSIHPEDVFDTDAPFFIK.V	Y	75.22	3277.58	27	1	1093.54	3	56.97	0	1	20180718_QX7_JRW_SA_L_II30.raw	0	0	54669	2444	2437	2463	K-MAL-H
1	2	KLH_2	T.QALK(+169.04)AQSIHPEDVFDTDAPFFIK.V	Y	62.98	2785.36	23	-1.7	929.459	3	54.25	0	1	20180718_QX7_JRW_SA_L_II30.raw	0	0	54536	2444	2441	2463	K-MAL-H
1	2	KLH_2	Q.ALK(+169.04)AQSIHPEDVFDTDAPFFIK.V	Y	72.16	2657.3	22	1.6	886.776	3	54.28	0	1	20180718_QX7_JRW_SA_L_II30.raw	0	0	54571	2444	2442	2463	K-MAL-H
1	2	KLH_2	K.TALPSSAIPAPTIIYSAGEGHTDDHGSDHIAGSGVRK(+169.04).D	Y	29.46	3853.85	37	6.4	643.32	6	40.73	0	1	20180718_QX7_JRW_SA_L_II30.raw	0	0	37751	2444	2472	2508	K-MAL-H
1	2	KLH_2	K.YRGFQYNAAHC(+57.02)DIQVLK(+169.04)QPLK.P	Y	49.5	2717.34	21	2.3	680.343	4	45.41	0	1	20180718_QX7_JRW_SA_L_II30.raw	0	0	44482	2735	2719	2739	Carbamidomethylation; K-MAL-H
1	2	KLH_2	K.QPLK(+169.04)PFSESRNPNPVTRAN.S	Y	29.34	2320.16	19	4.1	774.396	3	31.99	0	1	20180718_QX7_JRW_SA_L_II30.raw	0	0	28912	2739	2736	2754	K-MAL-H
1	2	KLH_2	R.LFRYDITK(+169.04)VLK.Q	Y	53.46	1563.87	11	1.1	522.297	3	45.52	0	1	20180718_QX7_JRW_SA_L_II30.raw	0	0	44610	2851	2844	2854	K-MAL-H

## Sheet: Table SIV
Table SIV. Identification of Lys residues modified with maleimide (K-MAL) and hydrolyzed maleimide (K-MAL-H) groups, in peptides obtained by digestion of KLH-Cys1pP0 conjugates with Lys-C+ trypsin.
Protein Group	Protein ID	Protein Accession	Peptide	Unique	-10lgP	Mass	Length	ppm	m/z	z	RT	Area Sample 1	Fraction	Source File	#Feature	#Feature Sample 1	Scan	K site	Start	End	PTM
2	1	KLH_1	R.EAFHK(+151.03)FQEDR.S	Y	53.21	1456.64	10	1.5	486.554	3	31.74	0	1	20180718_QX7_JRW_SA_T_II30.raw	0	0	24976	445	441	450	K-MAL
2	1	KLH_1	R.EAFHK(+169.04)FQEDR.S	Y	52.8	1474.65	10	0.6	738.332	2	26.42	0	1	20180718_QX7_JRW_SA_T_II30.raw	0	0	18721	445	441	450	K-MAL-H
2	1	KLH_1	F.HSSVIAFEENAPHTK(+169.04)R.Q	Y	37.34	1990.95	16	0.6	664.658	3	29.69	0	1	20180718_QX7_JRW_SA_T_II30.raw	0	0	22575	559	545	560	K-MAL-H
2	1	KLH_1	K.THANAMPNK(+169.04)IYDYENVLHYTYEDLTFGGISLENIEK.M	Y	53.47	4371.03	36	-0.8	1093.76	4	54.93	0	1	20180718_QX7_JRW_SA_T_II30.raw	0	0	51606	690	682	717	K-MAL-H
2	1	KLH_1	R.IWAIWQALQK(+169.04)YR.G	N	74.33	1743.91	12	5.1	872.967	2	54.98	0	1	20180718_QX7_JRW_SA_T_II30.raw	0	0	51662	1061	1052	1063	K-MAL-H
2	1	KLH_1	K.IEFEGENVHTK(+169.04)R.D	Y	50.06	1626.76	12	0.3	543.262	3	28.7	0	1	20180718_QX7_JRW_SA_T_II30.raw	0	0	19054	1803	1793	1804	K-MAL-H
2	1	KLH_1	K.YDITETLDK(+169.04)MNLR.H	Y	45.57	1779.84	13	-2.1	890.923	2	52	0	1	20180718_QX7_JRW_SA_T_II30.raw	0	0	48300	2032	2024	2036	K-MAL-H
2	1	KLH_1	K.VWAVWQALQEK(+169.04)R.G	Y	66.57	1681.86	12	3.8	841.939	2	54.52	0	1	20180718_QX7_JRW_SA_T_II30.raw	0	0	50544	2307	2297	2308	K-MAL-H
2	1	KLH_1	K.K(+169.04)HAVPNDVFK.Y	Y	49.61	1322.66	10	-0.9	441.894	3	27.89	0	1	20180718_QX7_JRW_SA_T_II30.raw	0	0	19995	2341	2341	2350	K-MAL-H
2	1	KLH_1	R.LYTK(+151.03)QM(+15.99)EDALTAHGAR.V	Y	48.37	1970.92	16	-1.1	657.978	3	15.09	0	1	20180718_QX7_JRW_SA_T_II30.raw	0	0	6302	2575	2572	2587	K-MAL; Oxidation (M)
2	1	KLH_1	K.RPLRPFSDPINHNAFTHSNAK(+169.04)PTDVFEYSR.F	Y	54.1	3681.77	30	-2.7	737.36	5	41.88	0	1	20180718_QX7_JRW_SA_T_II30.raw	0	0	35191	2754	2734	2763	K-MAL-H
2	1	KLH_1	R.PLRPFSDPINHNAFTHSNAK(+169.04)PTDVFEYSR.F	Y	53.32	3525.67	29	4.4	882.429	4	45.68	0	1	20180718_QX7_JRW_SA_T_II30.raw	0	0	41088	2754	2735	2763	K-MAL-H
2	1	KLH_1	R.IIDTSGK(+169.04)QLPSDLIK.M	Y	78.92	1795.96	15	0.1	898.986	2	45.23	0	1	20180718_QX7_JRW_SA_T_II30.raw	0	0	40580	2874	2868	2882	K-MAL-H
2	1	KLH_1	N.AVVDSHRFNYK(+169.04)YDNLNLHGHNIEELEEVLR.S	Y	47.66	3791.83	30	2.4	759.375	5	49.57	0	1	20180718_QX7_JRW_SA_T_II30.raw	0	0	45525	3173	3163	3192	K-MAL-H
1	2	KLH_2	R.EHAK(+169.04)PADSFDYGR.L	Y	60.97	1660.71	13	-1.3	554.577	3	27.59	0	1	20180718_QX7_JRW_SA_T_II30.raw	0	0	18659	265	262	274	K-MAL-H
1	2	KLH_2	R.QPTLVHRPAKGHFDK(+169.04)PPVPVAQANLAVR.K	Y	52.08	3211.74	28	0.2	643.355	5	35.42	0	1	20180718_QX7_JRW_SA_T_II30.raw	0	0	29278	409 or 414	400	427	K-MAL-H
1	2	KLH_2	R.PAK(+169.04)GHFDKPPVPVAQANLAVR.K	Y	63.01	2380.27	21	3.9	596.076	4	37.56	0	1	20180718_QX7_JRW_SA_T_II30.raw	0	0	31753	409	407	427	K-MAL-H
1	2	KLH_2	K.GHFDK(+169.04)PPVPVAQANLAVR.K	Y	52.76	2084.08	18	1.4	695.702	3	44.89	0	1	20180718_QX7_JRW_SA_T_II30.raw	0	0	40189	414	410	427	K-MAL-H
1	2	KLH_2	R.AM(+15.99)ADLQDDK(+169.04)TSGGFQQIAAFHGEPK.W	Y	37.81	2846.28	25	-0.1	712.578	4	21.97	0	1	20180718_QX7_JRW_SA_T_II30.raw	0	0	12026	863	855	879	Oxidation (M); K-MAL-H
1	2	KLH_2	R.GK(+169.04)PYNTANC(+57.02)AIASMR.K	Y	82.97	1821.81	15	-0.5	911.914	2	34.48	0	1	20180718_QX7_JRW_SA_T_II30.raw	0	0	28175	1064	1063	1077	K-MAL-H; Carbamidomethylation
1	2	KLH_2	A.NC(+57.02)AIASMRK(+151.03)PLQPFGLDSVINPDDETR.E	Y	57.05	3194.51	27	5.2	1065.85	3	47.22	0	1	20180718_QX7_JRW_SA_T_II30.raw	0	0	42845	1071	1070	1096	Carbamidomethylation; K-MAL
1	2	KLH_2	R.KK(+169.04)PYNEADC(+57.02)AVNEMR.K	Y	66.5	1992.87	15	-1.8	665.295	3	29.66	0	1	20180718_QX7_JRW_SA_T_II30.raw	0	0	22437	1475	1474	1488	K-MAL-H; Carbamidomethylation
1	2	KLH_2	K.PLQPFNNPELNSDSMTLK(+169.04)HNLPQDSFDYQNR.F	Y	48.18	3827.75	31	1.3	957.946	4	51.95	0	1	20180718_QX7_JRW_SA_T_II30.raw	0	0	46380	1507	1490	1520	K-MAL-H
1	2	KLH_2	K.PLQPFNNPELNSDSM(+15.99)TLK(+151.03)HNLPQDSFDYQNR.F	Y	46.05	3825.73	31	-2.5	957.438	4	52.2	0	1	20180718_QX7_JRW_SA_T_II30.raw	0	0	48527	1507	1490	1520	Oxidation (M); K-MAL
1	2	KLH_2	K.PLQPFNNPELNSDSM(+15.99)TLK(+169.04)HNLPQDSFDYQNR.F	Y	45.02	3843.74	31	1.3	961.944	4	50.64	0	1	20180718_QX7_JRW_SA_T_II30.raw	0	0	45482	1507	1490	1520	Oxidation (M); K-MAL-H
1	2	KLH_2	M.TLK(+169.04)HNLPQDSFDYQNR.F	Y	53.43	2143.99	16	3.1	715.674	3	35.08	0	1	20180718_QX7_JRW_SA_T_II30.raw	0	0	27934	1507	1505	1520	K-MAL-H
1	2	KLH_2	T.LK(+169.04)HNLPQDSFDYQNR.F	Y	73.49	2042.94	15	-0.9	681.988	3	32.14	0	1	20180718_QX7_JRW_SA_T_II30.raw	0	0	25458	1507	1506	1520	K-MAL-H
1	2	KLH_2	G.ERK(+169.04)NIYYDGLSQHNLVR.K	Y	42.93	2273.12	17	-8.4	569.282	4	22.57	0	1	20180718_QX7_JRW_SA_T_II30.raw	0	0	13371	1656	1654	1670	K-MAL-H
1	2	KLH_2	K.EVSSLTTLEK(+169.04)HFLR.K	Y	58.95	1827.94	14	-1.1	914.975	2	50.04	0	1	20180718_QX7_JRW_SA_T_II30.raw	0	0	46068	1681	1672	1685	K-MAL-H
1	2	KLH_2	R.KALK(+151.03)NMQADDSPDGYQAIASFH.A	Y	82.77	2557.15	22	-2.5	853.39	3	39.35	0	1	20180718_QX7_JRW_SA_T_II30.raw	0	0	33835	1689	1686	1707	K-MAL
1	2	KLH_2	R.KALK(+151.03)NMQADDSPDGYQAIASFHALPPLC(+57.02)PSPSAAHR.H	Y	76.12	4011.9	36	0.5	1003.98	4	46.49	0	1	20180718_QX7_JRW_SA_T_II30.raw	0	0	42017	1689	1686	1721	K-MAL; Carbamidomethylation
1	2	KLH_2	R.KALK(+169.04)NMQADDSPDGYQAIASFH.A	Y	66.26	2575.17	22	-2.1	859.394	3	42.51	0	1	20180718_QX7_JRW_SA_T_II30.raw	0	0	36423	1689	1686	1707	K-MAL-H
1	2	KLH_2	R.KALK(+169.04)NMQADDSPDGYQAIASF.H	Y	36.45	2438.11	21	6.5	1220.07	2	49.89	0	1	20180718_QX7_JRW_SA_T_II30.raw	0	0	45901	1689	1686	1706	K-MAL-H
1	2	KLH_2	R.KALK(+169.04)NM(+15.99)QADDSPDGYQAIASFH.A	Y	56.02	2591.16	22	1.3	864.729	3	39.49	0	1	20180718_QX7_JRW_SA_T_II30.raw	0	0	32624	1689	1686	1707	K-MAL-H; Oxidation (M)
1	2	KLH_2	R.LYTVQFEDSLK(+169.04)R.H	Y	62.68	1666.82	12	0.7	556.615	3	43.98	0	1	20180718_QX7_JRW_SA_T_II30.raw	0	0	39136	1748	1738	1749	K-MAL-H
1	2	KLH_2	K.PQSALPDLVTQETYEHLFSHK(+169.04)TFPNPF.L	Y	34.37	3311.58	27	1.9	1104.87	3	54.91	0	1	20180718_QX7_JRW_SA_T_II30.raw	0	0	51300	1784	1764	1790	K-MAL-H
1	2	KLH_2	G.LSGK(+151.03)EAHC(+57.02)ALEQMK.D	Y	58.14	1751.8	14	-3.1	876.903	2	31.36	0	1	20180718_QX7_JRW_SA_T_II30.raw	0	0	24541	1902	1899	1912	K-MAL; Carbamidomethylation
1	2	KLH_2	K.PFSFGSPYNLNK(+169.04)R.T	Y	49.46	1694.81	13	1.2	848.411	2	44.72	0	1	20180718_QX7_JRW_SA_T_II30.raw	0	0	39992	1928	1917	1929	K-MAL-H
1	2	KLH_2	R.DLASLK(+169.04)SAMR.S	Y	38.91	1259.62	10	0.5	630.817	2	39.39	0	1	20180718_QX7_JRW_SA_T_II30.raw	0	0	27995	2102	2097	2106	K-MAL-H
1	2	KLH_2	R.DLASLK(+169.04)SAM(+15.99)R.S	Y	35.35	1275.61	10	2.2	638.815	2	34.9	0	1	20180718_QX7_JRW_SA_T_II30.raw	0	0	27358	2102	2097	2106	K-MAL-H; Oxidation (M)
1	2	KLH_2	G.SAVAIPYWDWTKPISK(+151.03)LPDLFTSPEYYDPWR.D	Y	31.16	3891.88	31	-9.8	973.968	4	53.51	0	1	20180718_QX7_JRW_SA_T_II30.raw	0	0	49984	2179 or 2183	2168	2198	K-MAL
1	2	KLH_2	A.VAIPYWDWTK(+151.03)PISK(+169.04)LPDLFTSPEYYDPWR.D	Y	60.22	3902.85	29	0	976.72	4	54	0	1	20180718_QX7_JRW_SA_T_II30.raw	0	0	50540	2179, 2183	2170	2198	K-MAL; K-MAL-H
1	2	KLH_2	K.IWAVWQALQK(+151.03)KR.K	Y	49.67	1676.91	12	0.6	559.979	3	50.42	0	1	20180718_QX7_JRW_SA_T_II30.raw	0	0	46504	2308	2299	2310	K-MAL
1	2	KLH_2	K.IWAVWQALQKK(+169.04)R.K	Y	51.01	1694.93	12	2.9	565.984	3	52.68	0	1	20180718_QX7_JRW_SA_T_II30.raw	0	0	47926	2308 or 2309	2299	2310	K-MAL-H
1	2	KLH_2	R.NFK(+169.04)YDITQALK.A	Y	56.48	1508.75	11	3.1	755.385	2	48.86	0	1	20180718_QX7_JRW_SA_T_II30.raw	0	0	44724	2436	2434	2444	K-MAL-H
1	2	KLH_2	K.YDITQALK(+169.04)AQSIHPEDVFDTDAPFFIK.V	Y	58.63	3277.58	27	6.1	1093.54	3	55.17	0	1	20180718_QX7_JRW_SA_T_II30.raw	0	0	51870	2444	2437	2463	K-MAL-H
1	2	KLH_2	K.QPLK(+169.04)PFSESR.N	Y	59.37	1356.67	10	-3.3	679.339	2	33.19	0	1	20180718_QX7_JRW_SA_T_II30.raw	0	0	26660	2739	2736	2745	K-MAL-H
1	2	KLH_2	R.YDITK(+169.04)VLK.Q	Y	67.98	1147.61	8	1.6	574.815	2	42.32	0	1	20180718_QX7_JRW_SA_T_II30.raw	0	0	37255	2851	2847	2854	K-MAL-H

## Sheet: Table SV
Table SV. Identification of Lys residues modified with maleimide (K-MAL) and hydrolyzed maleimide (K-MAL-H) groups, in peptides obtained by digestion of KLH-Cys1pP0 conjugates with Lys-C+ trypsin+v8.
Protein Group	Protein ID	Protein Accession	Peptide	Unique	-10lgP	Mass	Length	ppm	m/z	z	RT	Area Sample 1	Fraction		Source File	#Feature	#Feature Sample 1	Scan	K site	Start	End	PTM
1	2	KLH_2	T.LK(+169.04)HNLPQDSFDYQNR.F	Y	35.69	2042.94	15	-0.3	681.989	3	31.25	0	1		20180718_QX7_JRW_SA_G_II30.raw	0	0	24103	1507	1506	1520	K-MAL-H
