# Supplementary material for: Characterization by LC-MS/MS analysis of KLH vaccine conjugated with a tick antigen peptide
Source: Royal Society of Chemistry journal article supplement (doi:10.1039/d4an01449a), 2025-01-01
Supplement: d4an01449a3.pdf [file d4an01449a3.pdf]

## Supplementary Tables

### ***Characterization by LC-MS/MS analysis of KLH vaccine conjugated with a tick antigen peptides.***

**Authors:** Satomy Pousa<sup>a,\*</sup>, Pablo E. Ramos-Bermúdez<sup>b</sup>, Vladimir Besada<sup>a</sup>, Ania Cabrales-Rico<sup>c</sup>, Osmany Guirola Cruz<sup>b</sup>, Hilda Elisa Garay<sup>d</sup>, Alina Rodríguez-Mallón<sup>e</sup>, Katharina Zettl<sup>f</sup>, Jacek R Wiśniewski<sup>f</sup> and Luis Javier González<sup>a,\*</sup>, §.

(\*) Authors contributed equally to this work.

(§) Corresponding Author

#### **Affiliations:**

<sup>a</sup>Departments of Proteomics, Mass Spectrometry Laboratory, <sup>b</sup>Bioinformatics, <sup>c</sup>Purification and Analytic Group, <sup>d</sup>Laboratory of Peptide Synthesis and <sup>e</sup>Animal Biotechnology. Center for Genetic Engineering and Biotechnology. 31 Avenue, Cubanacan, Playa, Havana, Cuba.

<sup>f</sup>Department of Proteomics and Signal Transduction, Max Planck Institute of Biochemistry, 82152 Munich, Germany

#### **Email:**

Satomy Pousa (satomy.pousa@cigb.edu.cu) / 0000-0001-8365-9844

Pablo E. Ramos-Bermúdez (pablo.ramos@cigb.edu.cu) / 0000-0002-8439-984X

Vladimir Besada (vladimir.besada@cigb.edu.cu) / 0000-0003-3584-7714

Ania Cabrales-Rico (ania.cabrales@cigb.edu.cu) / 0000-0002-9868-1830

Osmany Guirola: (osmany.guirola@cigb.edu.cu) / 0000-0001-9987-3394

Hilda Elisa Garay (hilda.garay@cigb.edu.cu) / 0000-0003-3101-255X

Alina Rodríguez-Mallón (alina.rodriguez@cigb.edu.cu) / 0000-0002-6950-6793

Katharina Zettl (zettl@biochem.mpg.de) / 0000-0002-8103-2711

Jacek R Wiśniewski (jwisniew@biochem.mpg.de) / 0000-0002-8452-5095

Luis Javier González (luis.javier@cigb.edu.cu) / 0000-0002-8875-3642

**Index:**

|                  |    |
|------------------|----|
| Table S1.....    | 3  |
| Table S2.....    | 3  |
| Table S3.....    | 3  |
| Table S4.....    | 4  |
| Table S5.....    | 4  |
| Table S6.....    | 5  |
| Table S7.....    | 22 |
| Table S8.....    | 36 |
| Table S9.....    | 45 |
| Table S10.....   | 49 |
| Table S11.....   | 51 |
| Table S12.....   | 57 |
| Table S13.....   | 63 |
| Table S14.....   | 64 |
| References ..... | 65 |

**Table S1.** Diagnostic ions originated by the fragmentation of the peptide bond located at the *N*-terminal side of Pro<sup>11</sup> [1] in Cys<sup>1</sup>pP0 peptides that were used to validate the assignment of the type 2 peptides performed by Kojak [2] and pLink2 [3] software. These fragment ions provide information on the number of amino acids of the proteolytic fragment of Cys<sup>1</sup>pP0 in the structures of all assigned type 2 peptides

| # | Cys <sup>1</sup> pP0 | y'' <sub>n</sub> (α or β) | m (y'' <sub>n</sub> ) |
|---|----------------------|---------------------------|-----------------------|
| 1 | (1-14)               | y'' <sub>3</sub>          | 374.1563              |
| 2 | (1-16)               | y'' <sub>5</sub>          | 589.2833              |
| 3 | (1-17)               | y'' <sub>6</sub>          | 717.3782              |

**Table S2.** Diagnostic ions named as C+L correspond to the fragmentation of the pseudopeptide bond between the linker and the epsilon amino group of Lys residues present in all type 2 peptides with transcyclized linker that contain in their structures different proteolytic fragments of Cys<sup>1</sup>pP0 peptide (see **Fig. S2** and **Fig. S3**). C means the different proteolytic fragments of the Cys<sup>1</sup>pP0 peptide linked by a pseudopeptide bond to the transcyclized linker named L (+C<sub>7</sub>H<sub>6</sub>NO<sub>3</sub>) in this manuscript. C+L fragment ion is considered a b<sub>n</sub> ion type, and the 2+ is due to the addition of one proton and the carbonyl group with a positive charge (-C=O<sup>⊕</sup>).

| # | Cys <sup>1</sup> pP0 | C+L                                                                             |                                |
|---|----------------------|---------------------------------------------------------------------------------|--------------------------------|
|   |                      | Global formula                                                                  | m/z                            |
| 1 | (1-11)               | C <sub>40</sub> H <sub>63</sub> N <sub>13</sub> O <sub>15</sub> S <sub>1</sub>  | 499.7222 (2+) / 998.4366 (1+)  |
| 2 | (1-14)               | C <sub>55</sub> H <sub>84</sub> N <sub>16</sub> O <sub>22</sub> S <sub>1</sub>  | 677.2911 (2+) / 1353.5744 (1+) |
| 3 | (1-16)               | C <sub>64</sub> H <sub>102</sub> N <sub>19</sub> O <sub>25</sub> S <sub>1</sub> | 784.8547 (2+) / 1568.7016 (1+) |
| 4 | (1-17)               | C <sub>70</sub> H <sub>113</sub> N <sub>21</sub> O <sub>26</sub> S <sub>1</sub> | 848.9022 (2+) / 1696.7966 (1+) |

**Table S3.** The diagnostic ion named as C+80 corresponds to the fragmentation of the new pseudopeptide bond originated after the transcyclization process that transforms the thiosuccinimide linker into transcyclized (**Fig. S2** and **Fig. S3**). C corresponds to different proteolytic fragments of the Cys<sup>1</sup>pP0 peptide. The C+80 fragment ion is exclusive of transcyclized linker, and also provides information on the number of amino acids present in the proteolytic fragment of Cys<sup>1</sup>pP0 for all type 2 peptides assigned with transcyclized linker.

| # | Cys <sup>1</sup> pP0 | C+80                                                                            |                                |
|---|----------------------|---------------------------------------------------------------------------------|--------------------------------|
|   |                      | Global formula                                                                  | m/z                            |
| 1 | (1-11)               | C <sub>37</sub> H <sub>58</sub> N <sub>12</sub> O <sub>14</sub> S <sub>1</sub>  | 464.2036 (2+) / 927.3994 (1+)  |
| 2 | (1-14)               | C <sub>52</sub> H <sub>79</sub> N <sub>15</sub> O <sub>21</sub> S <sub>1</sub>  | 641.7726 (2+) / 1282.5374 (1+) |
| 3 | (1-16)               | C <sub>61</sub> H <sub>96</sub> N <sub>18</sub> O <sub>24</sub> S <sub>1</sub>  | 749.3361 (2+) / 1497.6644 (1+) |
| 4 | (1-17)               | C <sub>67</sub> H <sub>108</sub> N <sub>20</sub> O <sub>25</sub> S <sub>1</sub> | 813.3836 (2+) / 1625.7594 (1+) |

**Table S4.** Diagnostic ions named as C+L<sub>n</sub> corresponding to the fragmentation of the pseudopeptide bond between the linker and the epsilon amino group of Lys residues present in all type 2 peptides that contain in their structures different proteolytic fragments of Cys<sup>1</sup>pP0 peptide and two structural variants of the linker: hydrolyzed thiosuccinimide linkers (see **Fig. S2** and **Fig. S4**). C means the different proteolytic fragments of the Cys<sup>1</sup>pP0 peptide linked by a pseudopeptide bond to the hydrolyzed thiosuccinimide linkers named as L (+C<sub>7</sub>H<sub>7</sub>NO<sub>4</sub>) in this manuscript. C+L<sub>n</sub> fragment ion is considered a b<sub>n</sub> ion type, and the 2+ is due to the addition of one proton and the carbonyl group with a positive charge (-C=O<sup>⊕</sup>).

| # | Cys <sup>1</sup> pP0 | C+L <sub>n</sub>                                                                |                                |
|---|----------------------|---------------------------------------------------------------------------------|--------------------------------|
|   |                      | Global formula                                                                  | m/z                            |
| 1 | (1-11)               | C <sub>40</sub> H <sub>65</sub> N <sub>13</sub> O <sub>16</sub> S <sub>1</sub>  | 508.7275 (2+) / 1016.4471 (1+) |
| 2 | (1-14)               | C <sub>55</sub> H <sub>86</sub> N <sub>16</sub> O <sub>23</sub> S <sub>1</sub>  | 686.2964 (2+) / 1371.5851 (1+) |
| 3 | (1-16)               | C <sub>64</sub> H <sub>104</sub> N <sub>19</sub> O <sub>26</sub> S <sub>1</sub> | 794.3638 (2+) / 1587.7198 (1+) |
| 4 | (1-17)               | C <sub>70</sub> H <sub>115</sub> N <sub>21</sub> O <sub>27</sub> S <sub>1</sub> | 857.9074 (2+) / 1714.8070 (1+) |

**Table S5.** The diagnostic ion named as C+98 corresponds to the fragmentation of the new pseudopeptide bond originated after the hydrolysis process that transforms the thiosuccinimide linker into hydrolyzed thiosuccinimide linkers (**Fig. S2** and **Fig. S4**). C corresponds to different proteolytic fragments of the Cys<sup>1</sup>pP0 peptide. The C+98 fragment ion is exclusive of hydrolyzed thiosuccinimide linkers, and also provides information on the number of amino acids present in the proteolytic fragment of Cys<sup>1</sup>pP0 for all type 2 peptides assigned with hydrolyzed thiosuccinimide linkers.

| # | Cys <sup>1</sup> pP0 | C+98                                                                            |                                |
|---|----------------------|---------------------------------------------------------------------------------|--------------------------------|
|   |                      | Global formula                                                                  | m/z                            |
| 1 | (1-11)               | C <sub>37</sub> H <sub>60</sub> N <sub>12</sub> O <sub>15</sub> S <sub>1</sub>  | 473.2089 (2+) / 945.4100 (1+)  |
| 2 | (1-14)               | C <sub>52</sub> H <sub>81</sub> N <sub>15</sub> O <sub>22</sub> S <sub>1</sub>  | 650.7779 (2+) / 1300.5480 (1+) |
| 3 | (1-16)               | C <sub>61</sub> H <sub>98</sub> N <sub>18</sub> O <sub>25</sub> S <sub>1</sub>  | 758.3414 (2+) / 1515.6749 (1+) |
| 4 | (1-17)               | C <sub>67</sub> H <sub>110</sub> N <sub>20</sub> O <sub>26</sub> S <sub>1</sub> | 822.3889 (2+) / 1643.7699 (1+) |

**Table S6.** Identification of conjugation sites in KLH1-Cys<sup>1</sup>pP0 conjugate using Kojak [2] and pLink2 [3] software. Type 2 peptides were identified using transcyclized and hydrolyzer linker.

| #  | <i>m/z</i> exp. | <i>m/z</i> theor. | <i>z</i> | Elemental composition                                                            | Assignment <sup>1)</sup>  | pLink <sup>2)</sup>                                                              | Kojak <sup>3)</sup>     | Conjugation site <sup>4)</sup> |   |
|----|-----------------|-------------------|----------|----------------------------------------------------------------------------------|---------------------------|----------------------------------------------------------------------------------|-------------------------|--------------------------------|---|
| 1  | 878.4431        | 878.4445          | 2        | C <sub>72</sub> H <sub>122</sub> N <sub>24</sub> O <sub>25</sub> S <sub>1</sub>  | [1-6] <sup>5)</sup>       |                                                                                  | X                       | Nt                             |   |
| 2  | 585.9651        | 585.9656          | 3        |                                                                                  |                           |                                                                                  |                         |                                | X |
| 3  | 582.2919        | 582.2917          | 4        | C <sub>96</sub> H <sub>160</sub> N <sub>30</sub> O <sub>35</sub> S <sub>1</sub>  | [1-6]                     |                                                                                  | X                       |                                |   |
| 4  | 466.0280        | 466.0355          | 5        |                                                                                  |                           |                                                                                  |                         |                                | X |
| 5  | 795.3931        | 795.4009          | 4        | C <sub>133</sub> H <sub>220</sub> N <sub>40</sub> O <sub>48</sub> S <sub>1</sub> | [6-24] <sup>5)</sup>      |                                                                                  | X                       | K6                             |   |
| 6  | 937.9585        | 937.9672          | 4        | C <sub>157</sub> H <sub>258</sub> N <sub>46</sub> O <sub>58</sub> S <sub>1</sub> | [6-24]                    |                                                                                  | X                       |                                |   |
| 7  | 750.5697        | 750.5753          | 5        |                                                                                  |                           |                                                                                  |                         |                                | X |
| 8  | 615.2849        | 615.2916          | 5        | C <sub>127</sub> H <sub>202</sub> N <sub>40</sub> O <sub>45</sub> S <sub>2</sub> | [38-52] <sup>6)</sup>     | X                                                                                | X                       | K51                            |   |
| 9  | 571.7819        | 571.7897          | 4        | C <sub>94</sub> H <sub>158</sub> N <sub>30</sub> O <sub>34</sub> S <sub>1</sub>  | [79-84]                   |                                                                                  | X                       | K83                            |   |
| 10 | 571.9575        | 571.9615          | 3        | C <sub>70</sub> H <sub>120</sub> N <sub>24</sub> O <sub>24</sub> S <sub>1</sub>  | [79-84] <sup>5)</sup>     | X                                                                                |                         |                                |   |
| 11 | 742.5496        | 742.5563          | 5        | C <sub>163</sub> H <sub>242</sub> N <sub>46</sub> O <sub>52</sub> S <sub>1</sub> | [118-134]                 | X                                                                                | X                       | K133                           |   |
| 12 | 618.9582        | 618.9650          | 6        |                                                                                  |                           |                                                                                  |                         |                                | X |
| 13 | 746.1531        | 746.1584          | 5        | C <sub>163</sub> H <sub>244</sub> N <sub>46</sub> O <sub>53</sub> S <sub>1</sub> | [118-134] <sup>7)</sup>   |                                                                                  | H                       |                                |   |
| 14 | 785.3786        | 785.3773          | 4        | C <sub>139</sub> H <sub>204</sub> N <sub>40</sub> O <sub>42</sub> S <sub>1</sub> | [118-134] <sup>5)</sup>   |                                                                                  | X                       |                                |   |
| 15 | 628.4973        | 628.5034          | 5        |                                                                                  |                           |                                                                                  | X                       |                                | X |
| 16 | 655.0707        | 655.0695          | 4        | C <sub>111</sub> H <sub>177</sub> N <sub>31</sub> O <sub>40</sub> S <sub>1</sub> | [126-134]                 | X                                                                                | X                       |                                |   |
| 17 | 682.9968        | 683.0025          | 3        | C <sub>87</sub> H <sub>139</sub> N <sub>25</sub> O <sub>30</sub> S <sub>1</sub>  | [126-134] <sup>5)</sup>   | X                                                                                | X                       |                                |   |
| 18 | 527.4250        | 527.4308          | 6        | C <sub>132</sub> H <sub>215</sub> N <sub>41</sub> O <sub>47</sub> S <sub>1</sub> | [134-146]                 | X                                                                                | X                       | K134                           |   |
| 19 | 632.7104        | 632.7156          | 5        |                                                                                  |                           |                                                                                  | X                       |                                | X |
| 20 | 790.6339        | 790.6432          | 4        |                                                                                  |                           |                                                                                  | X                       |                                | X |
| 21 | 648.0708        | 648.0770          | 4        | C <sub>108</sub> H <sub>177</sub> N <sub>35</sub> O <sub>37</sub> S <sub>1</sub> | [134-146] <sup>5)</sup>   | X                                                                                | X                       |                                |   |
| 22 | 522.2539        | 522.2550          | 4        | C <sub>84</sub> H <sub>140</sub> N <sub>28</sub> O <sub>32</sub> S <sub>1</sub>  | [134-137]                 |                                                                                  | X                       |                                |   |
| 23 | 587.6332        | 587.6382          | 3        | C <sub>77</sub> H <sub>125</sub> N <sub>21</sub> O <sub>24</sub> S <sub>1</sub>  | [143-148] <sup>5)</sup>   | X                                                                                | X                       | K146                           |   |
| 24 | 583.5411        | 583.5467          | 4        | C <sub>101</sub> H <sub>163</sub> N <sub>27</sub> O <sub>34</sub> S <sub>1</sub> | [143-148]                 | X                                                                                |                         |                                |   |
| 25 | 777.7212        | 777.7271          | 3        |                                                                                  |                           |                                                                                  | X                       |                                |   |
| 26 | 588.0424        | 588.0499          | 4        | C <sub>101</sub> H <sub>165</sub> N <sub>27</sub> O <sub>35</sub> S <sub>1</sub> | [143-148] <sup>7)</sup>   |                                                                                  | H                       |                                |   |
| 27 | 652.5242        | 652.5298          | 5        | C <sub>137</sub> H <sub>224</sub> N <sub>42</sub> O <sub>48</sub> S <sub>1</sub> | [135-148]                 | X                                                                                | X                       |                                |   |
| 28 | 543.9350        | 543.9428          | 6        |                                                                                  |                           |                                                                                  |                         |                                | X |
| 29 | 672.8362        | 672.8441          | 4        |                                                                                  |                           | C <sub>113</sub> H <sub>186</sub> N <sub>36</sub> O <sub>38</sub> S <sub>1</sub> | [135-148] <sup>5)</sup> |                                |   |
| 30 | 538.4708        | 538.4768          | 5        |                                                                                  | X                         |                                                                                  |                         |                                | X |
| 31 | 1095.5075       | 1095.5154         | 4        | C <sub>185</sub> H <sub>292</sub> N <sub>52</sub> O <sub>65</sub> S <sub>3</sub> | [147-170] <sup>6)</sup>   | X                                                                                | X                       | K148                           |   |
| 32 | 876.6099        | 876.6139          | 5        |                                                                                  |                           |                                                                                  |                         |                                | X |
| 33 | 1099.5063       | 1099.5142         | 4        | C <sub>185</sub> H <sub>292</sub> N <sub>52</sub> O <sub>66</sub> S <sub>3</sub> | [147-170] <sup>6,8)</sup> |                                                                                  | X                       |                                |   |
| 34 | 879.8086        | 879.8123          | 5        |                                                                                  |                           |                                                                                  | X                       |                                | X |
| 35 | 880.2071        | 880.2160          | 5        | C <sub>185</sub> H <sub>294</sub> N <sub>52</sub> O <sub>66</sub> S <sub>3</sub> | [147-170] <sup>6,7)</sup> |                                                                                  | H                       |                                |   |
| 36 | 952.9450        | 952.9492          | 4        | C <sub>161</sub> H <sub>254</sub> N <sub>46</sub> O <sub>55</sub> S <sub>3</sub> | [147-170] <sup>6,5)</sup> | X                                                                                | X                       |                                |   |

|    |           |           |   |                                                                                  |                             |   |   |      |   |
|----|-----------|-----------|---|----------------------------------------------------------------------------------|-----------------------------|---|---|------|---|
| 37 | 762.5601  | 762.5609  | 5 |                                                                                  |                             |   | X |      |   |
| 38 | 957.4440  | 957.4518  | 4 | C <sub>161</sub> H <sub>256</sub> N <sub>46</sub> O <sub>56</sub> S <sub>3</sub> | [147-170] <sup>5,6,7)</sup> |   | H |      |   |
| 39 | 766.1576  | 766.1630  | 5 |                                                                                  |                             |   |   | H    |   |
| 40 | 765.7520  | 765.7599  | 5 | C <sub>161</sub> H <sub>254</sub> N <sub>46</sub> O <sub>56</sub> S <sub>3</sub> | [147-170] <sup>6,5,8)</sup> |   | X |      |   |
| 41 | 956.9401  | 956.9479  | 4 |                                                                                  |                             |   |   | X    |   |
| 42 | 711.8349  | 711.8405  | 4 | C <sub>119</sub> H <sub>190</sub> N <sub>36</sub> O <sub>41</sub> S <sub>2</sub> | [147-157]                   | X | X |      |   |
| 43 | 569.6671  | 569.6744  | 5 |                                                                                  |                             |   |   | X    |   |
| 44 | 572.8731  | 572.8734  | 5 | C <sub>119</sub> H <sub>190</sub> N <sub>36</sub> O <sub>42</sub> S <sub>2</sub> | [147-157] <sup>8)</sup>     |   | X |      |   |
| 45 | 569.2675  | 569.2748  | 4 | C <sub>95</sub> H <sub>152</sub> N <sub>30</sub> O <sub>31</sub> S <sub>2</sub>  | [147-157] <sup>5)</sup>     | X |   |      |   |
| 46 | 573.2675  | 573.2730  | 4 | C <sub>95</sub> H <sub>152</sub> N <sub>30</sub> O <sub>32</sub> S <sub>2</sub>  | [147-157] <sup>5,8)</sup>   | X | X |      |   |
| 47 | 766.6697  | 766.6766  | 3 | C <sub>98</sub> H <sub>148</sub> N <sub>26</sub> O <sub>34</sub> S <sub>2</sub>  | [168-172] <sup>6)</sup>     |   | X | K170 |   |
| 48 | 804.9795  | 804.9852  | 5 | C <sub>173</sub> H <sub>266</sub> N <sub>50</sub> O <sub>57</sub> S <sub>2</sub> | [177-198]                   | X | X | K189 |   |
| 49 | 863.4078  | 863.4134  | 4 | C <sub>149</sub> H <sub>228</sub> N <sub>44</sub> O <sub>47</sub> S <sub>2</sub> | [177-198] <sup>5)</sup>     | X |   |      |   |
| 50 | 690.9272  | 690.9327  | 5 |                                                                                  |                             |   |   |      | X |
| 51 | 694.1261  | 694.1317  | 5 | C <sub>149</sub> H <sub>228</sub> N <sub>44</sub> O <sub>48</sub> S <sub>2</sub> | [177-198] <sup>5,8)</sup>   | X |   |      |   |
| 52 | 723.6800  | 723.6796  | 3 | C <sub>89</sub> H <sub>145</sub> N <sub>27</sub> O <sub>34</sub> S <sub>1</sub>  | [228-232]                   |   | X | K229 |   |
| 53 | 543.0110  | 543.0115  | 4 |                                                                                  |                             |   |   |      |   |
| 54 | 838.6378  | 838.6405  | 4 | C <sub>138</sub> H <sub>223</sub> N <sub>41</sub> O <sub>50</sub> S <sub>3</sub> | [230-244] <sup>6)</sup>     | X |   | K232 |   |
| 55 | 842.6319  | 842.6398  | 4 | C <sub>138</sub> H <sub>223</sub> N <sub>41</sub> O <sub>51</sub> S <sub>3</sub> | [230-244] <sup>6,8)</sup>   |   | X |      |   |
| 56 | 674.3055  | 674.3134  | 5 |                                                                                  |                             |   |   |      |   |
| 57 | 843.1373  | 843.1437  | 4 | C <sub>138</sub> H <sub>225</sub> N <sub>41</sub> O <sub>51</sub> S <sub>3</sub> | [230-244] <sup>6,7)</sup>   |   | H |      |   |
| 58 | 674.7166  | 674.7166  | 5 |                                                                                  |                             |   |   |      |   |
| 59 | 927.7682  | 927.7639  | 3 | C <sub>114</sub> H <sub>185</sub> N <sub>35</sub> O <sub>40</sub> S <sub>3</sub> | [230-244] <sup>6,5)</sup>   |   | X |      |   |
| 60 | 700.0668  | 700.0735  | 4 | C <sub>114</sub> H <sub>185</sub> N <sub>35</sub> O <sub>41</sub> S <sub>3</sub> | [230-244] <sup>6,5,8)</sup> |   | X |      |   |
| 61 | 788.1407  | 788.1486  | 5 | C <sub>164</sub> H <sub>250</sub> N <sub>46</sub> O <sub>61</sub> S <sub>3</sub> | [331-351] <sup>6,8)</sup>   |   | X | K337 |   |
| 62 | 788.3730  | 788.3772  | 4 | C <sub>136</sub> H <sub>212</sub> N <sub>36</sub> O <sub>46</sub> S <sub>2</sub> | [337-351]                   | X |   |      |   |
| 63 | 860.7427  | 860.7455  | 3 | C <sub>112</sub> H <sub>174</sub> N <sub>30</sub> O <sub>36</sub> S <sub>2</sub> | [337-351] <sup>5)</sup>     | X |   |      |   |
| 64 | 866.0728  | 866.0772  | 3 | C <sub>112</sub> H <sub>174</sub> N <sub>30</sub> O <sub>37</sub> S <sub>2</sub> | [337-351] <sup>5,8)</sup>   | X |   |      |   |
| 65 | 964.4519  | 964.4559  | 3 | C <sub>125</sub> H <sub>191</sub> N <sub>33</sub> O <sub>44</sub> S <sub>1</sub> | [337-349]                   | X |   |      |   |
| 66 | 1047.702  | 1047.6991 | 5 | C <sub>237</sub> H <sub>345</sub> N <sub>59</sub> O <sub>72</sub> S <sub>2</sub> | [338-368] <sup>8)</sup>     | X | X | K351 |   |
| 67 | 873.2523  | 873.2510  | 6 |                                                                                  |                             |   |   |      |   |
| 68 | 876.2488  | 876.2527  | 6 | C <sub>237</sub> H <sub>347</sub> N <sub>59</sub> O <sub>73</sub> S <sub>2</sub> | [338-368] <sup>7,8)</sup>   |   | H |      |   |
| 69 | 870.5794  | 870.5846  | 6 | C <sub>237</sub> H <sub>345</sub> N <sub>59</sub> O <sub>71</sub> S <sub>2</sub> | [338-368]                   | X | X |      |   |
| 70 | 1162.8056 | 1162.8076 | 4 | C <sub>213</sub> H <sub>307</sub> N <sub>53</sub> O <sub>61</sub> S <sub>2</sub> | [338-368] <sup>5)</sup>     |   | X |      |   |
| 71 | 930.4362  | 930.4476  | 5 |                                                                                  |                             |   |   |      | X |
| 72 | 933.6405  | 933.6466  | 5 | C <sub>213</sub> H <sub>307</sub> N <sub>53</sub> O <sub>62</sub> S <sub>2</sub> | [338-368] <sup>5,8)</sup>   | X |   |      |   |
| 73 | 951.4409  | 951.4462  | 4 | C <sub>170</sub> H <sub>248</sub> N <sub>44</sub> O <sub>52</sub> S <sub>2</sub> | [338-356]                   | X |   |      |   |
| 74 | 955.9403  | 955.9493  | 4 | C <sub>170</sub> H <sub>250</sub> N <sub>44</sub> O <sub>53</sub> S <sub>2</sub> | [338-356] <sup>7)</sup>     |   | H |      |   |
| 75 | 955.4407  | 955.4449  | 4 | C <sub>170</sub> H <sub>248</sub> N <sub>44</sub> O <sub>53</sub> S <sub>2</sub> | [338-356] <sup>8)</sup>     | X |   |      |   |
| 76 | 685.9835  | 685.9891  | 3 | C <sub>91</sub> H <sub>134</sub> N <sub>26</sub> O <sub>25</sub> S <sub>2</sub>  | [350-356] <sup>5)</sup>     | X |   |      |   |
| 77 | 691.3156  | 691.3213  | 3 | C <sub>91</sub> H <sub>134</sub> N <sub>26</sub> O <sub>26</sub> S <sub>2</sub>  | [350-356] <sup>5,8)</sup>   | X |   |      |   |

|     |           |           |   |                                                                                  |                           |                                                                                  |                            |      |   |   |
|-----|-----------|-----------|---|----------------------------------------------------------------------------------|---------------------------|----------------------------------------------------------------------------------|----------------------------|------|---|---|
| 78  | 846.8000  | 846.8035  | 5 | C <sub>189</sub> H <sub>281</sub> N <sub>49</sub> O <sub>56</sub> S <sub>3</sub> | [352-372]                 | X                                                                                | X                          | K368 |   |   |
| 79  | 1058.2454 | 1058.2531 | 4 |                                                                                  |                           |                                                                                  |                            |      | X |   |
| 80  | 850.004   | 850.0024  | 5 |                                                                                  |                           | C <sub>189</sub> H <sub>281</sub> N <sub>49</sub> O <sub>57</sub> S <sub>3</sub> | [352-372] <sup>8)</sup>    |      | X | X |
| 81  | 732.7431  | 732.7510  | 5 |                                                                                  |                           | C <sub>165</sub> H <sub>243</sub> N <sub>43</sub> O <sub>46</sub> S <sub>3</sub> | [352-372] <sup>5)</sup>    |      |   | X |
| 82  | 590.2802  | 590.2808  | 5 | C <sub>124</sub> H <sub>199</sub> N <sub>35</sub> O <sub>42</sub> S <sub>3</sub> | [369-380]                 | X                                                                                | X                          | K372 |   |   |
| 83  | 737.5990  | 737.5991  | 4 |                                                                                  |                           |                                                                                  |                            |      | X | X |
| 84  | 983.1236  | 983.1303  | 3 |                                                                                  |                           |                                                                                  |                            |      |   | X |
| 85  | 593.8726  | 593.8834  | 5 | C <sub>124</sub> H <sub>201</sub> N <sub>35</sub> O <sub>43</sub> S <sub>3</sub> | [369-380] <sup>7)</sup>   |                                                                                  | H                          |      |   |   |
| 86  | 741.598   | 741.5978  | 4 | C <sub>124</sub> H <sub>199</sub> N <sub>35</sub> O <sub>43</sub> S <sub>3</sub> | [369-380] <sup>8)</sup>   | X                                                                                | X                          |      |   |   |
| 87  | 593.4800  | 593.4797  | 5 |                                                                                  |                           |                                                                                  |                            |      | X | X |
| 88  | 741.598   | 741.5978  | 4 |                                                                                  |                           |                                                                                  |                            |      | X | X |
| 89  | 593.4800  | 593.4797  | 5 |                                                                                  |                           |                                                                                  |                            |      |   | X |
| 90  | 596.6747  | 596.6793  | 5 | C <sub>124</sub> H <sub>199</sub> N <sub>35</sub> O <sub>44</sub> S <sub>3</sub> | [369-380] <sup>8)</sup>   |                                                                                  | X                          |      |   |   |
| 91  | 793.0405  | 793.0420  | 3 | C <sub>100</sub> H <sub>161</sub> N <sub>29</sub> O <sub>32</sub> S <sub>3</sub> | [369-380] <sup>5)</sup>   |                                                                                  | X                          |      |   |   |
| 92  | 595.0266  | 595.0334  | 4 |                                                                                  |                           |                                                                                  |                            | X    | X |   |
| 93  | 599.0262  | 599.0322  | 4 |                                                                                  |                           | C <sub>100</sub> H <sub>161</sub> N <sub>29</sub> O <sub>33</sub> S <sub>3</sub> | [369-380] <sup>5, 8)</sup> | X    | X |   |
| 94  | 618.7845  | 618.7925  | 4 | C <sub>104</sub> H <sub>162</sub> N <sub>30</sub> O <sub>38</sub> S <sub>1</sub> | [375-382]                 |                                                                                  | X                          | K380 |   |   |
| 95  | 634.6263  | 634.6318  | 3 | C <sub>80</sub> H <sub>124</sub> N <sub>24</sub> O <sub>28</sub> S <sub>1</sub>  | [375-382] <sup>5)</sup>   | X                                                                                |                            |      |   |   |
| 96  | 710.6632  | 710.6689  | 3 | C <sub>90</sub> H <sub>140</sub> N <sub>26</sub> O <sub>32</sub> S <sub>1</sub>  | [373-382] <sup>5)</sup>   | X                                                                                | X                          |      |   |   |
| 97  | 900.7518  | 900.7578  | 3 | C <sub>114</sub> H <sub>178</sub> N <sub>32</sub> O <sub>42</sub> S <sub>1</sub> | [373-382]                 |                                                                                  | X                          |      |   |   |
| 98  | 675.8142  | 675.8197  | 4 |                                                                                  |                           |                                                                                  |                            | X    | X |   |
| 99  | 852.7515  | 852.7520  | 3 | C <sub>110</sub> H <sub>174</sub> N <sub>30</sub> O <sub>38</sub> S <sub>1</sub> | [407-415]                 |                                                                                  | X                          | K407 |   |   |
| 100 | 639.8106  | 639.8154  | 4 |                                                                                  |                           |                                                                                  |                            |      | X | X |
| 101 | 662.6586  | 662.6631  | 3 |                                                                                  |                           | C <sub>86</sub> H <sub>136</sub> N <sub>24</sub> O <sub>28</sub> S <sub>1</sub>  | [407-415] <sup>5)</sup>    |      | X | X |
| 102 | 619.4785  | 619.4837  | 6 | C <sub>160</sub> H <sub>255</sub> N <sub>49</sub> O <sub>51</sub> S <sub>1</sub> | [408-426]                 | X                                                                                | X                          | K415 |   |   |
| 103 | 531.1240  | 531.1299  | 7 |                                                                                  |                           |                                                                                  |                            |      | X |   |
| 104 | 575.6627  | 575.6680  | 5 | C <sub>122</sub> H <sub>184</sub> N <sub>36</sub> O <sub>43</sub> S <sub>1</sub> | [441-450]                 | X                                                                                | X                          | K445 |   |   |
| 105 | 719.3277  | 719.3333  | 4 |                                                                                  |                           |                                                                                  |                            |      | X | X |
| 106 | 579.2631  | 579.2707  | 5 | C <sub>122</sub> H <sub>186</sub> N <sub>36</sub> O <sub>44</sub> S <sub>1</sub> | [441-450] <sup>7)</sup>   |                                                                                  | H                          |      |   |   |
| 107 | 581.2634  | 581.2702  | 4 | C <sub>98</sub> H <sub>148</sub> N <sub>30</sub> O <sub>34</sub> S <sub>1</sub>  | [441-450] <sup>5,7)</sup> |                                                                                  | H                          |      |   |   |
| 108 | 768.6823  | 768.6869  | 3 | C <sub>98</sub> H <sub>146</sub> N <sub>30</sub> O <sub>33</sub> S <sub>1</sub>  | [441-450] <sup>5)</sup>   | X                                                                                |                            |      |   |   |
| 109 | 576.7616  | 576.7676  | 4 |                                                                                  |                           |                                                                                  |                            |      | X |   |
| 110 | 671.3138  | 671.3145  | 4 | C <sub>108</sub> H <sub>176</sub> N <sub>36</sub> O <sub>40</sub> S <sub>2</sub> | [468-476] <sup>6)</sup>   | X                                                                                | X                          | K474 |   |   |
| 111 | 537.2528  | 537.2530  | 5 |                                                                                  |                           |                                                                                  |                            |      | X | X |
| 112 | 704.6560  | 704.6624  | 3 | C <sub>84</sub> H <sub>138</sub> N <sub>30</sub> O <sub>30</sub> S <sub>2</sub>  | [468-476] <sup>6,5)</sup> | X                                                                                |                            |      |   |   |
| 113 | 528.7429  | 528.7487  | 4 |                                                                                  |                           |                                                                                  |                            |      | X |   |
| 114 | 568.0131  | 568.0183  | 4 | C <sub>92</sub> H <sub>149</sub> N <sub>29</sub> O <sub>36</sub> S <sub>1</sub>  | [471-476]                 | X                                                                                |                            |      |   |   |
| 115 | 566.9285  | 566.9337  | 3 | C <sub>68</sub> H <sub>111</sub> N <sub>23</sub> O <sub>26</sub> S <sub>1</sub>  | [471-476] <sup>5)</sup>   | X                                                                                |                            |      |   |   |
| 116 | 598.5361  | 598.5422  | 4 | C <sub>98</sub> H <sub>159</sub> N <sub>33</sub> O <sub>35</sub> S <sub>1</sub>  | [554-560]                 | X                                                                                | X                          | K559 |   |   |
| 117 | 479.0289  | 479.0352  | 5 |                                                                                  |                           |                                                                                  |                            |      | X | X |
| 118 | 455.9701  | 455.9760  | 4 |                                                                                  |                           | C <sub>74</sub> H <sub>121</sub> N <sub>27</sub> O <sub>25</sub> S <sub>1</sub>  | [554-560] <sup>5)</sup>    |      | X | X |

|     |           |           |   |                                 |                           |                                |           |      |
|-----|-----------|-----------|---|---------------------------------|---------------------------|--------------------------------|-----------|------|
| 119 | 607.6264  | 607.6322  | 3 |                                 |                           | X                              | X         |      |
| 120 | 425.2052  | 425.2104  | 4 | $C_{72}H_{112}N_{24}O_{22}S_1$  | [651-655] <sup>5)</sup>   | X                              |           | K652 |
| 121 | 566.6069  | 566.6113  | 3 |                                 |                           | X                              |           |      |
| 122 | 567.7703  | 567.7767  | 4 |                                 |                           | $C_{96}H_{150}N_{30}O_{32}S_1$ | [651-655] |      |
| 123 | 572.2781  | 572.2793  | 4 | $C_{96}H_{152}N_{30}O_{33}S$    | [651-655] <sup>7)</sup>   |                                | H         |      |
| 124 | 711.7656  | 711.7734  | 7 | $C_{216}H_{331}N_{63}O_{67}S_3$ | [653-681] <sup>6)</sup>   |                                | X         | K668 |
| 125 | 777.8717  | 777.8749  | 4 | $C_{135}H_{206}N_{40}O_{41}S_2$ | [664-681] <sup>5)</sup>   | X                              | X         |      |
| 126 | 912.8345  | 912.8362  | 5 | $C_{196}H_{303}N_{57}O_{63}S_3$ | [656-681] <sup>6)</sup>   |                                | X         |      |
| 127 | 760.8655  | 760.8648  | 6 |                                 |                           | X                              |           |      |
| 128 | 1040.8932 | 1040.8925 | 5 | $C_{229}H_{343}N_{59}O_{76}S_2$ | [682-717] <sup>5)</sup>   |                                | X         | K690 |
| 129 | 1154.9458 | 1154.9454 | 5 | $C_{253}H_{381}N_{65}O_{86}S_2$ | [682-717]                 |                                | X         |      |
| 130 | 962.6211  | 962.6219  | 6 |                                 |                           | X                              | X         |      |
| 131 | 1158.5446 | 1158.5475 | 5 | $C_{253}H_{383}N_{65}O_{87}S_2$ | [682-717] <sup>7)</sup>   |                                | H         |      |
| 132 | 965.6205  | 965.6243  | 6 |                                 |                           | H                              |           |      |
| 133 | 646.0499  | 646.0560  | 4 | $C_{107}H_{173}N_{31}O_{39}S_2$ | [714-721]                 | X                              | X         | K717 |
| 134 | 861.069   | 861.0728  | 3 |                                 |                           | X                              |           |      |
| 135 | 650.0489  | 650.0552  | 4 | $C_{107}H_{173}N_{31}O_{40}S_2$ | [714-721] <sup>8)</sup>   | X                              | X         |      |
| 136 | 670.9796  | 670.9844  | 3 | $C_{83}H_{135}N_{25}O_{29}S_2$  | [714-721] <sup>5,8)</sup> | X                              | X         |      |
| 137 | 742.3402  | 742.3495  | 3 | $C_{92}H_{149}N_{27}O_{33}S_2$  | [717-721]                 |                                | X         |      |
| 138 | 557.0042  | 557.0142  | 4 |                                 |                           | X                              | X         |      |
| 139 | 552.2560  | 552.2613  | 3 | $C_{68}H_{111}N_{21}O_{23}S_2$  | [717-721] <sup>5)</sup>   | X                              |           |      |
| 140 | 1005.3302 | 1005.3360 | 6 | $C_{260}H_{413}N_{75}O_{86}S_2$ | [718-756]                 |                                | X         | K748 |
| 141 | 861.8522  | 861.8605  | 7 |                                 |                           | X                              |           |      |
| 142 | 864.1376  | 864.1456  | 7 | $C_{260}H_{413}N_{75}O_{87}S_2$ | [718-756] <sup>8)</sup>   |                                | X         |      |
| 143 | 1001.4903 | 1001.4895 | 3 | $C_{127}H_{204}N_{36}O_{46}S_1$ | [739-756] <sup>5)</sup>   |                                | X         |      |
| 144 | 751.1180  | 751.1231  | 4 |                                 |                           | X                              | X         |      |
| 145 | 715.1474  | 715.1530  | 5 | $C_{151}H_{243}N_{43}O_{55}S_1$ | [739-756]                 | X                              | X         |      |
| 146 | 893.6818  | 893.6893  | 4 |                                 |                           | X                              |           |      |
| 147 | 718.7489  | 718.7551  | 5 | $C_{151}H_{245}N_{43}O_{56}S_1$ | [739-756] <sup>7)</sup>   |                                | H         |      |
| 148 | 1157.8936 | 1157.8990 | 3 | $C_{146}H_{235}N_{43}O_{53}S_1$ | [749-767]                 |                                | X         | K756 |
| 149 | 868.6730  | 868.6757  | 4 |                                 |                           | X                              | X         |      |
| 150 | 695.1378  | 695.1420  | 5 | X                               | X                         |                                |           |      |
| 151 | 698.7365  | 698.7447  | 5 | $C_{146}H_{237}N_{43}O_{54}S_1$ | [749-767] <sup>7)</sup>   |                                | H         |      |
| 152 | 730.6070  | 730.6126  | 4 | $C_{122}H_{199}N_{37}O_{44}S_1$ | [749-767] <sup>5,7)</sup> |                                | H         |      |
| 153 | 584.6856  | 584.6917  | 5 |                                 |                           | H                              |           |      |
| 154 | 967.8090  | 967.8107  | 3 | $C_{122}H_{197}N_{37}O_{43}S_1$ | [749-767] <sup>5)</sup>   |                                | X         |      |
| 155 | 726.1093  | 726.1100  | 4 |                                 |                           | X                              |           |      |
| 156 | 631.7093  | 631.7181  | 5 | $C_{134}H_{216}N_{40}O_{46}S_1$ | [752-767]                 |                                | X         |      |
| 157 | 988.4799  | 988.4800  | 3 | $C_{125}H_{203}N_{35}O_{44}S_2$ | [757-770]                 |                                | X         | K767 |
| 158 | 741.612   | 741.6114  | 4 |                                 |                           | X                              | X         |      |
| 159 | 593.4913  | 593.4905  | 5 |                                 |                           | X                              | X         |      |



|     |           |           |   |                                                                                  |                           |                                                                                  |                         |      |   |
|-----|-----------|-----------|---|----------------------------------------------------------------------------------|---------------------------|----------------------------------------------------------------------------------|-------------------------|------|---|
| 160 | 746.1049  | 746.1146  | 4 | C <sub>125</sub> H <sub>205</sub> N <sub>35</sub> O <sub>45</sub> S <sub>2</sub> | [757-770] <sup>7)</sup>   |                                                                                  | H                       |      |   |
| 161 | 993.8126  | 993.8126  | 3 | C <sub>125</sub> H <sub>203</sub> N <sub>35</sub> O <sub>45</sub> S <sub>2</sub> | [757-770] <sup>8)</sup>   |                                                                                  | X                       |      |   |
| 162 | 745.611   | 745.6101  | 4 |                                                                                  |                           | X                                                                                | X                       |      |   |
| 163 | 1197.0838 | 1197.0836 | 2 | C <sub>101</sub> H <sub>165</sub> N <sub>29</sub> O <sub>34</sub> S <sub>2</sub> | [757-770] <sup>5)</sup>   |                                                                                  | X                       |      |   |
| 164 | 798.3874  | 798.3917  | 3 |                                                                                  |                           | X                                                                                | X                       |      |   |
| 165 | 603.5399  | 603.5483  | 4 | C <sub>101</sub> H <sub>167</sub> N <sub>29</sub> O <sub>35</sub> S <sub>2</sub> | [757-770] <sup>5,7)</sup> |                                                                                  | H                       |      |   |
| 166 | 902.0965  | 902.1010  | 3 | C <sub>114</sub> H <sub>182</sub> N <sub>32</sub> O <sub>42</sub> S <sub>1</sub> | [757-768]                 | X                                                                                | X                       |      |   |
| 167 | 1067.5108 | 1067.5153 | 2 | C <sub>90</sub> H <sub>144</sub> N <sub>26</sub> O <sub>32</sub> S <sub>1</sub>  | [757-768] <sup>5)</sup>   | X                                                                                |                         |      |   |
| 168 | 712.0128  | 712.0132  | 3 |                                                                                  |                           |                                                                                  | X                       |      |   |
| 169 | 602.8903  | 602.8895  | 5 | C <sub>132</sub> H <sub>200</sub> N <sub>36</sub> O <sub>41</sub> S <sub>2</sub> | [768-778]                 | X                                                                                | X                       | K770 |   |
| 170 | 753.3620  | 753.3601  | 4 |                                                                                  |                           | X                                                                                | X                       |      |   |
| 171 | 1004.1401 | 1004.1450 | 3 |                                                                                  |                           |                                                                                  | X                       |      |   |
| 172 | 757.8599  | 757.8633  | 4 | C <sub>132</sub> H <sub>202</sub> N <sub>36</sub> O <sub>42</sub> S <sub>2</sub> | [768-778] <sup>7)</sup>   |                                                                                  | H                       |      |   |
| 173 | 606.4879  | 606.4922  | 5 |                                                                                  |                           |                                                                                  | H                       |      |   |
| 174 | 1009.4764 | 1009.4760 | 3 | C <sub>132</sub> H <sub>200</sub> N <sub>36</sub> O <sub>42</sub> S <sub>2</sub> | [768-778] <sup>8)</sup>   | X                                                                                | X                       |      |   |
| 175 | 757.3602  | 757.3594  | 4 |                                                                                  |                           |                                                                                  | X                       |      |   |
| 176 | 606.0896  | 606.0891  | 5 |                                                                                  |                           |                                                                                  | X                       |      |   |
| 177 | 610.7901  | 610.7944  | 4 |                                                                                  |                           | C <sub>108</sub> H <sub>162</sub> N <sub>30</sub> O <sub>31</sub> S <sub>2</sub> | [768-778] <sup>5)</sup> |      | X |
| 178 | 814.0541  | 814.0566  | 3 | X                                                                                | X                         |                                                                                  |                         |      |   |
| 179 | 615.2913  | 615.2971  | 4 | C <sub>108</sub> H <sub>164</sub> N <sub>30</sub> O <sub>32</sub> S <sub>2</sub> | [768-778] <sup>5,7)</sup> |                                                                                  | H                       |      |   |
| 180 | 819.3825  | 819.3882  | 3 | C <sub>108</sub> H <sub>162</sub> N <sub>30</sub> O <sub>32</sub> S <sub>2</sub> | [768-778] <sup>5,8)</sup> | X                                                                                | X                       |      |   |
| 181 | 614.7876  | 614.7932  | 4 |                                                                                  |                           | X                                                                                | X                       |      |   |
| 182 | 674.5163  | 674.5215  | 6 | C <sub>175</sub> H <sub>285</sub> N <sub>53</sub> O <sub>55</sub> S <sub>1</sub> | [805-831]                 | X                                                                                |                         | K828 |   |
| 183 | 735.3577  | 735.3599  | 3 | C <sub>94</sub> H <sub>150</sub> N <sub>26</sub> O <sub>33</sub> S <sub>1</sub>  | [827-831]                 | X                                                                                | X                       |      |   |
| 184 | 551.7722  | 551.7718  | 4 |                                                                                  |                           | X                                                                                | X                       |      |   |
| 185 | 545.2670  | 545.2722  | 3 | C <sub>70</sub> H <sub>112</sub> N <sub>20</sub> O <sub>23</sub> S <sub>1</sub>  | [827-831] <sup>5)</sup>   | X                                                                                | X                       |      |   |
| 186 | 583.0301  | 583.0370  | 4 | C <sub>99</sub> H <sub>157</sub> N <sub>29</sub> O <sub>34</sub> S <sub>1</sub>  | [829-834]                 |                                                                                  | X                       | K831 |   |
| 187 | 586.9534  | 586.9579  | 3 | C <sub>75</sub> H <sub>119</sub> N <sub>23</sub> O <sub>24</sub> S <sub>1</sub>  | [829-834] <sup>5)</sup>   | X                                                                                | X                       |      |   |
| 188 | 771.4043  | 771.4114  | 4 | C <sub>132</sub> H <sub>220</sub> N <sub>42</sub> O <sub>41</sub> S <sub>1</sub> | [829-840]                 |                                                                                  | X                       |      |   |
| 189 | 617.3209  | 617.3307  | 5 |                                                                                  |                           |                                                                                  | X                       |      |   |
| 190 | 514.6029  | 514.6102  | 6 |                                                                                  |                           |                                                                                  | X                       |      |   |
| 191 | 733.6799  | 733.6874  | 3 | C <sub>89</sub> H <sub>147</sub> N <sub>29</sub> O <sub>34</sub> S <sub>1</sub>  | [840-844]                 |                                                                                  | X                       | K840 |   |
| 192 | 550.5169  | 550.5169  | 4 |                                                                                  |                           |                                                                                  | X                       |      |   |
| 193 | 668.6802  | 668.6787  | 6 | C <sub>169</sub> H <sub>284</sub> N <sub>50</sub> O <sub>58</sub> S <sub>2</sub> | [841-861]                 |                                                                                  | X                       | K855 |   |
| 194 | 642.831   | 642.8298  | 4 | C <sub>109</sub> H <sub>182</sub> N <sub>30</sub> O <sub>39</sub> S <sub>1</sub> | [856-864]                 | X                                                                                | X                       | K861 |   |
| 195 | 856.7718  | 856.7706  | 3 |                                                                                  |                           | X                                                                                | X                       |      |   |
| 196 | 647.3260  | 647.3330  | 4 | C <sub>109</sub> H <sub>184</sub> N <sub>30</sub> O <sub>40</sub> S <sub>1</sub> | [856-864] <sup>7)</sup>   |                                                                                  | H                       |      |   |
| 197 | 893.4140  | 893.4193  | 4 | C <sub>152</sub> H <sub>232</sub> N <sub>44</sub> O <sub>54</sub> S <sub>1</sub> | [862-880]                 | X                                                                                | X                       | K864 |   |
| 198 | 714.9320  | 714.9369  | 5 |                                                                                  |                           | X                                                                                | X                       |      |   |
| 199 | 718.5317  | 718.5396  | 5 | C <sub>152</sub> H <sub>234</sub> N <sub>44</sub> O <sub>55</sub> S <sub>1</sub> | [862-880] <sup>7)</sup>   |                                                                                  | H                       |      |   |
| 200 | 750.8456  | 750.8536  | 4 | C <sub>128</sub> H <sub>194</sub> N <sub>38</sub> O <sub>44</sub> S <sub>1</sub> | [862-880] <sup>5)</sup>   |                                                                                  | X                       |      |   |

|     |           |           |   |                                                                                  |                             |                                                                                  |           |       |
|-----|-----------|-----------|---|----------------------------------------------------------------------------------|-----------------------------|----------------------------------------------------------------------------------|-----------|-------|
| 201 | 989.4524  | 989.4512  | 4 | C <sub>171</sub> H <sub>252</sub> N <sub>48</sub> O <sub>57</sub> S <sub>2</sub> | [865-886] <sup>6)</sup>     |                                                                                  | X         | K880  |
| 202 | 1060.9844 | 1060.9923 | 4 | C <sub>183</sub> H <sub>274</sub> N <sub>52</sub> O <sub>61</sub> S <sub>2</sub> | [865-889] <sup>6)</sup>     |                                                                                  | X         |       |
| 203 | 848.9908  | 848.9954  | 5 |                                                                                  |                             | X                                                                                | X         |       |
| 204 | 852.5901  | 852.5975  | 5 | C <sub>183</sub> H <sub>276</sub> N <sub>52</sub> O <sub>62</sub> S <sub>2</sub> | [865-889] <sup>6,7)</sup>   |                                                                                  | H         |       |
| 205 | 710.6585  | 710.6659  | 6 |                                                                                  |                             |                                                                                  | H         |       |
| 206 | 738.5376  | 738.5445  | 5 | C <sub>159</sub> H <sub>238</sub> N <sub>46</sub> O <sub>52</sub> S <sub>2</sub> | [865-889] <sup>6,5,7)</sup> |                                                                                  | H         |       |
| 207 | 1224.2280 | 1224.2322 | 3 | C <sub>159</sub> H <sub>236</sub> N <sub>46</sub> O <sub>51</sub> S <sub>2</sub> | [865-889] <sup>6,5)</sup>   |                                                                                  | X         |       |
| 208 | 918.4220  | 918.4260  | 4 |                                                                                  |                             | X                                                                                | X         |       |
| 209 | 690.066   | 690.0706  | 4 | C <sub>116</sub> H <sub>181</sub> N <sub>33</sub> O <sub>41</sub> S <sub>2</sub> | [881-890]                   | X                                                                                | X         | K889  |
| 210 | 729.6655  | 729.6707  | 3 | C <sub>92</sub> H <sub>143</sub> N <sub>27</sub> O <sub>31</sub> S <sub>2</sub>  | [881-890] <sup>5)</sup>     | X                                                                                | X         |       |
| 211 | 694.5670  | 694.5738  | 4 | C <sub>116</sub> H <sub>183</sub> N <sub>33</sub> O <sub>42</sub> S <sub>2</sub> | [881-890] <sup>7)</sup>     |                                                                                  | H         |       |
| 212 | 882.5682  | 882.5748  | 6 | C <sub>236</sub> H <sub>337</sub> N <sub>61</sub> O <sub>77</sub> S <sub>1</sub> | [919-955] <sup>5)</sup>     | X                                                                                |           | K945  |
| 213 | 977.6133  | 977.6190  | 6 | C <sub>260</sub> H <sub>375</sub> N <sub>67</sub> O <sub>87</sub> S <sub>1</sub> | [919-955]                   | X                                                                                | X         |       |
| 214 | 1172.9337 | 1172.9418 | 5 |                                                                                  |                             |                                                                                  | X         |       |
| 215 | 1066.7587 | 1066.7583 | 4 | C <sub>181</sub> H <sub>279</sub> N <sub>55</sub> O <sub>63</sub> S <sub>1</sub> | [956-978]                   |                                                                                  | X         | K969  |
| 216 | 853.6026  | 853.6086  | 5 |                                                                                  |                             | X                                                                                |           |       |
| 217 | 711.5028  | 711.5079  | 6 |                                                                                  |                             | X                                                                                | X         |       |
| 218 | 609.9998  | 610.0084  | 7 |                                                                                  |                             |                                                                                  | X         |       |
| 219 | 714.5037  | 714.5103  | 6 | C <sub>181</sub> H <sub>281</sub> N <sub>55</sub> O <sub>64</sub> S <sub>1</sub> | [956-978] <sup>7)</sup>     |                                                                                  | H         |       |
| 220 | 616.4599  | 616.4644  | 6 | C <sub>157</sub> H <sub>241</sub> N <sub>49</sub> O <sub>53</sub> S <sub>1</sub> | [956-978] <sup>5)</sup>     | X                                                                                |           |       |
| 221 | 739.5514  | 739.5556  | 5 |                                                                                  |                             |                                                                                  | X         |       |
| 222 | 743.1513  | 743.1577  | 5 | C <sub>157</sub> H <sub>243</sub> N <sub>49</sub> O <sub>54</sub> S <sub>1</sub> | [956-978] <sup>5,7)</sup>   |                                                                                  | H         |       |
| 223 | 618.7838  | 618.7924  | 6 | C <sub>158</sub> H <sub>239</sub> N <sub>47</sub> O <sub>55</sub> S <sub>1</sub> | [956-973]                   |                                                                                  | X         |       |
| 224 | 742.3406  | 742.3487  | 5 |                                                                                  |                             | X                                                                                | X         |       |
| 225 | 927.6770  | 927.6846  | 4 |                                                                                  |                             |                                                                                  | X         |       |
| 226 | 870.8224  | 870.8278  | 5 |                                                                                  |                             | C <sub>188</sub> H <sub>293</sub> N <sub>53</sub> O <sub>64</sub> S <sub>1</sub> | [970-993] | X     |
| 227 | 725.8507  | 725.8582  | 6 |                                                                                  | X                           |                                                                                  |           |       |
| 228 | 945.7093  | 945.7172  | 4 | C <sub>164</sub> H <sub>255</sub> N <sub>47</sub> O <sub>54</sub> S <sub>1</sub> | [970-993] <sup>5)</sup>     |                                                                                  | X         | K978  |
| 229 | 778.9748  | 778.9789  | 5 | C <sub>170</sub> H <sub>260</sub> N <sub>46</sub> O <sub>57</sub> S <sub>1</sub> | [974-993]                   | X                                                                                | X         |       |
| 230 | 973.4654  | 973.4724  | 4 |                                                                                  |                             |                                                                                  | X         |       |
| 231 | 830.9014  | 830.9061  | 4 | C <sub>146</sub> H <sub>222</sub> N <sub>40</sub> O <sub>47</sub> S <sub>1</sub> | [974-993] <sup>5)</sup>     | X                                                                                |           |       |
| 232 | 962.7864  | 962.7906  | 3 | C <sub>122</sub> H <sub>192</sub> N <sub>34</sub> O <sub>45</sub> S <sub>1</sub> | [974-984]                   | X                                                                                | X         |       |
| 233 | 772.6981  | 772.7029  | 3 | C <sub>98</sub> H <sub>154</sub> N <sub>28</sub> O <sub>35</sub> S <sub>1</sub>  | [974-984] <sup>5)</sup>     | X                                                                                | X         |       |
| 234 | 840.1704  | 840.1750  | 4 | C <sub>148</sub> H <sub>233</sub> N <sub>39</sub> O <sub>48</sub> S <sub>1</sub> | [985-1000]                  | X                                                                                |           | K993  |
| 235 | 786.6422  | 786.6493  | 4 | C <sub>141</sub> H <sub>215</sub> N <sub>39</sub> O <sub>41</sub> S <sub>1</sub> | [1052-1063]                 |                                                                                  | X         | K1061 |
| 236 | 809.6231  | 809.6287  | 4 | C <sub>133</sub> H <sub>215</sub> N <sub>41</sub> O <sub>47</sub> S <sub>3</sub> | [1064-1078] <sup>6)</sup>   | X                                                                                | X         | K1065 |
| 237 | 813.6219  | 813.6274  | 4 | C <sub>133</sub> H <sub>215</sub> N <sub>41</sub> O <sub>48</sub> S <sub>3</sub> | [1064-1078] <sup>6,8)</sup> | X                                                                                | X         |       |
| 238 | 889.0747  | 889.0814  | 3 | C <sub>109</sub> H <sub>177</sub> N <sub>35</sub> O <sub>37</sub> S <sub>3</sub> | [1064-1078] <sup>6,5)</sup> | X                                                                                | X         |       |
| 239 | 945.2021  | 945.2061  | 4 | C <sub>161</sub> H <sub>253</sub> N <sub>45</sub> O <sub>58</sub> S <sub>1</sub> | [1079-1098]                 | X                                                                                | X         | K1097 |
| 240 | 922.9169  | 922.9217  | 4 | C <sub>164</sub> H <sub>234</sub> N <sub>42</sub> O <sub>54</sub> S <sub>1</sub> | [1099-1115]                 | X                                                                                | X         | K1109 |
| 241 | 1040.1314 | 1040.1387 | 3 | C <sub>140</sub> H <sub>196</sub> N <sub>36</sub> O <sub>44</sub> S <sub>1</sub> | [1099-1115] <sup>5)</sup>   | X                                                                                | X         |       |

|     |           |           |   |                                                                                  |                             |   |   |       |
|-----|-----------|-----------|---|----------------------------------------------------------------------------------|-----------------------------|---|---|-------|
| 242 | 955.1780  | 955.1823  | 4 | C <sub>169</sub> H <sub>241</sub> N <sub>43</sub> O <sub>57</sub> S <sub>1</sub> | [1098-1115]                 | X |   |       |
| 243 | 1083.1485 | 1083.1523 | 3 | C <sub>145</sub> H <sub>203</sub> N <sub>37</sub> O <sub>47</sub> S <sub>1</sub> | [1098-1115] <sup>5)</sup>   | X |   |       |
| 244 | 1128.9239 | 1128.9299 | 5 | C <sub>251</sub> H <sub>367</sub> N <sub>63</sub> O <sub>84</sub> S <sub>1</sub> | [1097-1130]                 |   | X |       |
| 245 | 1268.3416 | 1268.3442 | 4 | C <sub>227</sub> H <sub>329</sub> N <sub>57</sub> O <sub>74</sub> S <sub>1</sub> | [1097-1131] <sup>5)</sup>   | X |   |       |
| 246 | 568.0434  | 568.0428  | 4 | C <sub>96</sub> H <sub>161</sub> N <sub>27</sub> O <sub>34</sub> S <sub>1</sub>  | [1132-1137]                 | X | X |       |
| 247 | 572.5384  | 572.5460  | 4 | C <sub>96</sub> H <sub>163</sub> N <sub>27</sub> O <sub>35</sub> S <sub>1</sub>  | [1132-1137] <sup>7)</sup>   |   | H |       |
| 248 | 458.2307  | 458.2383  | 5 |                                                                                  |                             |   | H |       |
| 249 | 572.9630  | 572.9703  | 3 | C <sub>72</sub> H <sub>125</sub> N <sub>21</sub> O <sub>25</sub> S <sub>1</sub>  | [1132-1137] <sup>5,7)</sup> |   | H |       |
| 250 | 566.9621  | 566.9663  | 3 | C <sub>72</sub> H <sub>123</sub> N <sub>21</sub> O <sub>24</sub> S <sub>1</sub>  | [1132-1137] <sup>5)</sup>   | X | X |       |
| 251 | 657.5689  | 657.5737  | 4 | C <sub>108</sub> H <sub>179</sub> N <sub>33</sub> O <sub>41</sub> S <sub>1</sub> | [1133-1141]                 |   | X | K1137 |
| 252 | 683.9344  | 683.9406  | 5 | C <sub>152</sub> H <sub>231</sub> N <sub>41</sub> O <sub>47</sub> S <sub>1</sub> | [1138-1153]                 | X | X |       |
| 253 | 854.6695  | 854.6740  | 4 |                                                                                  |                             | X | X |       |
| 254 | 859.1713  | 859.1771  | 4 | C <sub>152</sub> H <sub>233</sub> N <sub>41</sub> O <sub>48</sub> S <sub>1</sub> | [1138-1153] <sup>7)</sup>   |   | H |       |
| 255 | 687.5370  | 687.5433  | 5 |                                                                                  |                             |   | H |       |
| 256 | 573.1142  | 573.1207  | 6 |                                                                                  |                             |   | H |       |
| 257 | 712.1029  | 712.1083  | 4 | C <sub>128</sub> H <sub>193</sub> N <sub>35</sub> O <sub>37</sub> S <sub>1</sub> | [1138-1153] <sup>5)</sup>   | X |   |       |
| 258 | 733.1138  | 733.1193  | 4 | C <sub>134</sub> H <sub>201</sub> N <sub>33</sub> O <sub>39</sub> S <sub>1</sub> | [1142-1153]                 | X | X |       |
| 259 | 553.6184  | 553.6230  | 3 | C <sub>69</sub> H <sub>119</sub> N <sub>21</sub> O <sub>24</sub> S <sub>1</sub>  | [1153-1158] <sup>5)</sup>   | X | X |       |
| 260 | 562.5303  | 562.5381  | 4 | C <sub>93</sub> H <sub>159</sub> N <sub>27</sub> O <sub>35</sub> S <sub>1</sub>  | [1153-1158] <sup>7)</sup>   |   | H |       |
| 261 | 450.2242  | 450.2321  | 5 |                                                                                  |                             |   | H |       |
| 262 | 1233.7552 | 1233.7631 | 5 | C <sub>268</sub> H <sub>399</sub> N <sub>71</sub> O <sub>89</sub> S <sub>4</sub> | [1154-1192] <sup>6)</sup>   |   | X |       |
| 263 | 1028.2960 | 1028.3038 | 6 |                                                                                  |                             |   | X | K1158 |
| 264 | 981.4701  | 981.4788  | 3 | C <sub>126</sub> H <sub>200</sub> N <sub>34</sub> O <sub>45</sub> S <sub>1</sub> | [1193-1203]                 |   | X |       |
| 265 | 736.361   | 736.3605  | 4 |                                                                                  |                             | X | X |       |
| 266 | 589.2900  | 589.2899  | 5 | C <sub>102</sub> H <sub>164</sub> N <sub>28</sub> O <sub>36</sub> S <sub>1</sub> | [1193-1203] <sup>5,7)</sup> | X | X |       |
| 267 | 598.2896  | 598.2974  | 4 |                                                                                  |                             |   | H |       |
| 268 | 740.8566  | 740.8636  | 4 |                                                                                  |                             |   | H |       |
| 269 | 592.8851  | 592.8925  | 5 | C <sub>126</sub> H <sub>202</sub> N <sub>34</sub> O <sub>46</sub> S <sub>1</sub> | [1193-1203] <sup>7)</sup>   |   | H |       |
| 270 | 791.3863  | 791.3904  | 3 | C <sub>102</sub> H <sub>162</sub> N <sub>28</sub> O <sub>35</sub> S <sub>1</sub> | [1193-1203] <sup>5)</sup>   | X | X |       |
| 271 | 569.9479  | 569.9543  | 3 | C <sub>72</sub> H <sub>118</sub> N <sub>22</sub> O <sub>24</sub> S <sub>1</sub>  | [1202-1207] <sup>5)</sup>   | X | X |       |
| 272 | 570.2786  | 570.2843  | 4 | C <sub>96</sub> H <sub>156</sub> N <sub>28</sub> O <sub>34</sub> S <sub>1</sub>  | [1202-1207]                 | X | X |       |
| 273 | 661.5712  | 661.5762  | 4 | C <sub>112</sub> H <sub>179</sub> N <sub>33</sub> O <sub>39</sub> S <sub>1</sub> | [1199-1207]                 |   | X |       |
| 274 | 529.4550  | 529.4630  | 5 |                                                                                  |                             | X | X |       |
| 275 | 519.0027  | 519.0106  | 4 | C <sub>88</sub> H <sub>141</sub> N <sub>27</sub> O <sub>29</sub> S <sub>1</sub>  | [1199-1207] <sup>5)</sup>   | X | X |       |
| 276 | 752.3671  | 752.3655  | 5 | C <sub>170</sub> H <sub>249</sub> N <sub>43</sub> O <sub>52</sub> S <sub>1</sub> | [1199-1220] <sup>5)</sup>   |   | X |       |
| 277 | 866.4133  | 866.4185  | 5 | C <sub>194</sub> H <sub>287</sub> N <sub>49</sub> O <sub>62</sub> S <sub>1</sub> | [1199-1220]                 |   | X |       |
| 278 | 722.1778  | 722.1833  | 6 |                                                                                  |                             | X | X |       |
| 279 | 619.1523  | 619.1583  | 7 |                                                                                  |                             | X |   |       |
| 280 | 1069.5106 | 1069.5145 | 4 | C <sub>191</sub> H <sub>284</sub> N <sub>48</sub> O <sub>62</sub> S <sub>1</sub> | [1204-1226]                 |   | X |       |
| 281 | 855.8153  | 855.8126  | 5 |                                                                                  |                             | X | X |       |
| 282 | 713.3400  | 713.3450  | 6 |                                                                                  |                             | X | X | K1220 |

|     |           |           |    |                                                                                  |                             |   |   |       |       |
|-----|-----------|-----------|----|----------------------------------------------------------------------------------|-----------------------------|---|---|-------|-------|
| 283 | 1235.5961 | 1235.5951 | 3  | C <sub>167</sub> H <sub>246</sub> N <sub>42</sub> O <sub>52</sub> S <sub>1</sub> | [1204-1226] <sup>5)</sup>   |   | X |       |       |
| 284 | 926.9425  | 926.9482  | 4  |                                                                                  |                             | X | X |       |       |
| 285 | 716.3395  | 716.3474  | 6  | C <sub>191</sub> H <sub>286</sub> N <sub>48</sub> O <sub>63</sub> S <sub>1</sub> | [1204-1226] <sup>7)</sup>   |   | H |       |       |
| 286 | 859.4074  | 859.4153  | 5  |                                                                                  |                             |   | H |       |       |
| 287 | 724.7014  | 724.7094  | 3  | C <sub>95</sub> H <sub>154</sub> N <sub>26</sub> O <sub>30</sub> S <sub>1</sub>  | [1216-1226] <sup>5)</sup>   |   | X |       |       |
| 288 | 596.0538  | 596.0587  | 4  | C <sub>101</sub> H <sub>169</sub> N <sub>29</sub> O <sub>35</sub> S <sub>1</sub> | [1219-1226]                 | X | X |       |       |
| 289 | 604.3158  | 604.3209  | 3  | C <sub>77</sub> H <sub>131</sub> N <sub>23</sub> O <sub>25</sub> S <sub>1</sub>  | [1219-1226] <sup>5)</sup>   | X | X |       |       |
| 290 | 661.5776  | 661.5831  | 4  | C <sub>114</sub> H <sub>183</sub> N <sub>31</sub> O <sub>39</sub> S <sub>1</sub> | [1221-1230]                 | X | X |       | K1226 |
| 291 | 691.6829  | 691.6865  | 3  | C <sub>90</sub> H <sub>145</sub> N <sub>25</sub> O <sub>29</sub> S <sub>1</sub>  | [1221-1230] <sup>5)</sup>   | X | X |       |       |
| 292 | 1045.1789 | 1045.1838 | 3  | C <sub>135</sub> H <sub>213</sub> N <sub>39</sub> O <sub>45</sub> S <sub>1</sub> | [1227-1239]                 | X | X | K1230 |       |
| 293 | 784.1342  | 784.1397  | 4  |                                                                                  |                             | X | X |       |       |
| 294 | 627.5074  | 627.5132  | 5  |                                                                                  |                             | X | X |       |       |
| 295 | 855.0922  | 855.0961  | 3  | C <sub>111</sub> H <sub>175</sub> N <sub>33</sub> O <sub>35</sub> S <sub>1</sub> | [1227-1239] <sup>5)</sup>   | X | X |       |       |
| 296 | 641.5682  | 641.5735  | 4  |                                                                                  |                             | X | X |       |       |
| 297 | 551.7740  | 551.7817  | 10 | C <sub>237</sub> H <sub>375</sub> N <sub>73</sub> O <sub>77</sub> S <sub>1</sub> | [1227-1260]                 |   | X |       |       |
| 298 | 612.9710  | 612.9789  | 9  |                                                                                  |                             |   | X |       |       |
| 299 | 689.4657  | 689.4752  | 8  |                                                                                  |                             |   | X |       |       |
| 300 | 787.8270  | 787.8271  | 7  |                                                                                  |                             | X | X |       |       |
| 301 | 918.9559  | 918.9644  | 6  |                                                                                  |                             |   | X |       |       |
| 302 | 706.3595  | 706.3613  | 7  | C <sub>213</sub> H <sub>337</sub> N <sub>67</sub> O <sub>67</sub> S <sub>1</sub> | [1227-1260] <sup>5)</sup>   |   | X |       |       |
| 303 | 618.1919  | 618.1921  | 8  |                                                                                  |                             |   | X |       |       |
| 304 | 646.0688  | 646.0767  | 4  | C <sub>111</sub> H <sub>177</sub> N <sub>33</sub> O <sub>36</sub> S              | [1227-1239] <sup>5,7)</sup> |   | H |       |       |
| 305 | 517.0551  | 517.0629  | 5  |                                                                                  |                             |   | H |       |       |
| 306 | 788.6351  | 788.6429  | 4  | C <sub>135</sub> H <sub>215</sub> N <sub>39</sub> O <sub>46</sub> S              | [1227-1239] <sup>7)</sup>   |   | H |       |       |
| 307 | 631.1081  | 631.1159  | 5  |                                                                                  |                             |   | H |       |       |
| 308 | 526.0901  | 526.0979  | 6  |                                                                                  |                             |   | H |       |       |
| 309 | 620.4356  | 620.4434  | 8  | C <sub>213</sub> H <sub>339</sub> N <sub>67</sub> O <sub>68</sub> S <sub>1</sub> | [1227-1260] <sup>5,7)</sup> |   | H |       |       |
| 310 | 614.9726  | 614.9800  | 9  | C <sub>237</sub> H <sub>377</sub> N <sub>73</sub> O <sub>78</sub> S <sub>1</sub> | [1227-1260] <sup>7)</sup>   |   | H |       |       |
| 311 | 821.4076  | 821.4122  | 4  | C <sub>137</sub> H <sub>228</sub> N <sub>40</sub> O <sub>51</sub> S <sub>1</sub> | [1260-1274]                 | X | X | K1260 |       |
| 312 | 904.7876  | 904.7922  | 3  | C <sub>113</sub> H <sub>190</sub> N <sub>34</sub> O <sub>41</sub> S <sub>1</sub> | [1260-1274] <sup>5)</sup>   | X | X |       |       |
| 313 | 660.9260  | 660.9339  | 5  | C <sub>137</sub> H <sub>230</sub> N <sub>40</sub> O <sub>52</sub> S              | [1260-1274] <sup>7)</sup>   |   | H |       |       |
| 314 | 1019.2111 | 1019.2093 | 3  | C <sub>135</sub> H <sub>223</sub> N <sub>35</sub> O <sub>43</sub> S <sub>1</sub> | [1322-1334]                 | X | X | K1333 |       |
| 315 | 764.6542  | 764.6593  | 4  |                                                                                  |                             |   | X |       |       |
| 316 | 829.1136  | 829.1215  | 3  | C <sub>111</sub> H <sub>185</sub> N <sub>29</sub> O <sub>33</sub> S <sub>1</sub> | [1322-1334] <sup>5)</sup>   |   | X |       |       |
| 317 | 752.0474  | 752.0553  | 3  | C <sub>95</sub> H <sub>160</sub> N <sub>28</sub> O <sub>33</sub> S <sub>1</sub>  | [1329-1334]                 |   | X |       |       |
| 318 | 564.2878  | 564.2934  | 4  |                                                                                  |                             | X | X |       |       |
| 319 | 561.9631  | 561.9664  | 3  | C <sub>95</sub> H <sub>160</sub> N <sub>28</sub> O <sub>33</sub> S <sub>1</sub>  | [1329-1334] <sup>5)</sup>   | X |   |       |       |
| 320 | 615.5233  | 615.5311  | 5  | C <sub>135</sub> H <sub>225</sub> N <sub>35</sub> O <sub>44</sub> S              | [1322-1334] <sup>7)</sup>   |   | H |       |       |
| 321 | 926.0926  | 926.1015  | 3  | C <sub>120</sub> H <sub>182</sub> N <sub>32</sub> O <sub>42</sub> S <sub>1</sub> | [1334-1344]                 |   | X | K1334 |       |
| 322 | 805.6307  | 805.6346  | 4  | C <sub>141</sub> H <sub>211</sub> N <sub>39</sub> O <sub>46</sub> S <sub>1</sub> | [1335-1348]                 | X | X | K1347 |       |
| 323 | 550.1286  | 550.1368  | 8  | C <sub>187</sub> H <sub>281</sub> N <sub>59</sub> O <sub>63</sub> S <sub>1</sub> | [1366-1388]                 |   | X | K1378 |       |

|     |           |           |   |                                                                                   |                             |   |   |       |
|-----|-----------|-----------|---|-----------------------------------------------------------------------------------|-----------------------------|---|---|-------|
| 324 | 638.1296  | 638.1351  | 6 | C <sub>163</sub> H <sub>243</sub> N <sub>53</sub> O <sub>53</sub> S <sub>1</sub>  | [1366-1388] <sup>5)</sup>   | X |   |       |
| 325 | 665.3010  | 665.3088  | 4 | C <sub>112</sub> H <sub>168</sub> N <sub>36</sub> O <sub>38</sub> S <sub>1</sub>  | [1371-1384] <sup>5)</sup>   |   | X |       |
| 326 | 915.0206  | 915.0264  | 5 | C <sub>201</sub> H <sub>296</sub> N <sub>54</sub> O <sub>65</sub> S <sub>2</sub>  | [1435-1460]                 | X | X | K1436 |
| 327 | 762.6899  | 762.6899  | 6 |                                                                                   |                             | X | X |       |
| 328 | 804.5682  | 804.5761  | 5 | C <sub>177</sub> H <sub>260</sub> N <sub>48</sub> O <sub>56</sub> S <sub>2</sub>  | [1435-1460] <sup>5,7)</sup> |   | H |       |
| 329 | 918.6212  | 918.6291  | 5 | C <sub>201</sub> H <sub>298</sub> N <sub>54</sub> O <sub>66</sub> S <sub>2</sub>  | [1435-1460] <sup>7)</sup>   |   | H |       |
| 330 | 800.9677  | 800.9734  | 5 | C <sub>177</sub> H <sub>258</sub> N <sub>48</sub> O <sub>55</sub> S <sub>2</sub>  | [1435-1460] <sup>5)</sup>   | X | X |       |
| 331 | 1000.9573 | 1000.9655 | 4 |                                                                                   |                             | X | X |       |
| 332 | 918.2202  | 918.2254  | 5 | C <sub>201</sub> H <sub>296</sub> N <sub>54</sub> O <sub>66</sub> S <sub>2</sub>  | [1435-1460] <sup>8)</sup>   | X | X |       |
| 333 | 765.3635  | 765.3557  | 6 |                                                                                   |                             | X |   |       |
| 334 | 572.5379  | 572.5367  | 4 | C <sub>96</sub> H <sub>155</sub> N <sub>31</sub> O <sub>32</sub> S <sub>1</sub>   | [1473-1477]                 | X | X |       |
| 335 | 458.2304  | 458.2308  | 5 |                                                                                   |                             | X | X |       |
| 336 | 572.9528  | 572.9578  | 3 | C <sub>72</sub> H <sub>117</sub> N <sub>25</sub> O <sub>22</sub> S <sub>1</sub>   | [1473-1477] <sup>5)</sup>   | X |   |       |
| 337 | 429.9649  | 429.9710  | 4 |                                                                                   |                             | X |   |       |
| 338 | 747.6392  | 747.6392  | 7 | C <sub>219</sub> H <sub>344</sub> N <sub>66</sub> O <sub>77</sub> S <sub>3</sub>  | [1474-1504] <sup>6)</sup>   |   | X | K1495 |
| 339 | 872.0774  | 872.0771  | 6 |                                                                                   |                             | X | X |       |
| 340 | 932.2377  | 932.2387  | 5 | C <sub>195</sub> H <sub>306</sub> N <sub>60</sub> O <sub>67</sub> S <sub>3</sub>  | [1474-1504] <sup>6,5)</sup> |   | X |       |
| 341 | 777.0347  | 777.0336  | 6 |                                                                                   |                             |   | X |       |
| 342 | 931.8216  | 931.8275  | 5 | C <sub>193</sub> H <sub>304</sub> N <sub>56</sub> O <sub>72</sub> S <sub>3</sub>  | [1478-1504] <sup>6)</sup>   | X |   |       |
| 343 | 1046.7570 | 1046.76   | 7 | C <sub>314</sub> H <sub>463</sub> N <sub>89</sub> O <sub>111</sub> S <sub>2</sub> | [1496-1544]                 | X | X | K1504 |
| 344 | 814.3652  | 814.3718  | 9 |                                                                                   |                             |   | X |       |
| 345 | 766.3659  | 766.3738  | 3 | C <sub>92</sub> H <sub>153</sub> N <sub>33</sub> O <sub>34</sub> S                | [1544-1548] <sup>7)</sup>   |   | H | K1544 |
| 346 | 823.7555  | 823.7605  | 3 | C <sub>105</sub> H <sub>177</sub> N <sub>29</sub> O <sub>37</sub> S <sub>1</sub>  | [1605-1612]                 |   | X | K1609 |
| 347 | 618.0715  | 618.0718  | 4 |                                                                                   |                             | X | X |       |
| 348 | 950.0033  | 950.0044  | 2 | C <sub>81</sub> H <sub>139</sub> N <sub>23</sub> O <sub>27</sub> S <sub>1</sub>   | [1605-1612] <sup>5)</sup>   |   | X |       |
| 349 | 633.6669  | 633.6722  | 3 |                                                                                   |                             | X | X |       |
| 350 | 639.6679  | 639.6657  | 3 | C <sub>81</sub> H <sub>141</sub> N <sub>23</sub> O <sub>28</sub> S <sub>1</sub>   | [1605-1612] <sup>5,7)</sup> |   | H |       |
| 351 | 622.5671  | 622.5750  | 4 | C <sub>105</sub> H <sub>179</sub> N <sub>29</sub> O <sub>38</sub> S               | [1605-1612] <sup>7)</sup>   |   | H |       |
| 352 | 653.3223  | 653.3270  | 3 | C <sub>81</sub> H <sub>136</sub> N <sub>24</sub> O <sub>30</sub> S <sub>1</sub>   | [1669-1676] <sup>5)</sup>   | X |   | K1669 |
| 353 | 632.8130  | 632.8139  | 4 | C <sub>105</sub> H <sub>174</sub> N <sub>30</sub> O <sub>40</sub> S <sub>1</sub>  | [1669-1676]                 | X | X |       |
| 354 | 671.3490  | 671.3491  | 5 | C <sub>141</sub> H <sub>238</sub> N <sub>42</sub> O <sub>50</sub> S <sub>1</sub>  | [1670-1684]                 | X | X | K1676 |
| 355 | 838.9298  | 838.9351  | 4 |                                                                                   |                             |   | X |       |
| 356 | 1118.2451 | 1118.2437 | 3 |                                                                                   | X                           | X |   |       |
| 357 | 696.3640  | 696.3689  | 4 | C <sub>117</sub> H <sub>200</sub> N <sub>36</sub> O <sub>40</sub> S <sub>1</sub>  | [1670-1684] <sup>5)</sup>   | X | X |       |
| 358 | 852.7502  | 852.7501  | 3 | C <sub>105</sub> H <sub>174</sub> N <sub>32</sub> O <sub>40</sub> S <sub>1</sub>  | [1670-1677]                 | X | X |       |
| 359 | 639.8146  | 639.8144  | 4 |                                                                                   |                             | X | X |       |
| 360 | 662.6572  | 662.6618  | 3 | C <sub>81</sub> H <sub>136</sub> N <sub>26</sub> O <sub>30</sub> S <sub>1</sub>   | [1670-1677] <sup>5)</sup>   | X |   |       |
| 361 | 588.0424  | 588.0499  | 4 | C <sub>101</sub> H <sub>165</sub> N <sub>27</sub> O <sub>35</sub> S               | [1670-1677] <sup>7)</sup>   |   | H |       |
| 362 | 843.4299  | 843.4378  | 4 | C <sub>141</sub> H <sub>240</sub> N <sub>42</sub> O <sub>51</sub> S <sub>1</sub>  | [1670-1684] <sup>7)</sup>   |   | H |       |
| 363 | 674.9439  | 674.9518  | 5 |                                                                                   |                             |   | H |       |
| 364 | 800.4025  | 800.4122  | 4 | C <sub>134</sub> H <sub>228</sub> N <sub>40</sub> O <sub>46</sub> S <sub>1</sub>  | [1677-1690]                 | X | X | K1684 |

|     |           |           |   |                                                                                   |                              |   |   |       |       |   |
|-----|-----------|-----------|---|-----------------------------------------------------------------------------------|------------------------------|---|---|-------|-------|---|
| 365 | 640.531   | 640.5308  | 5 |                                                                                   |                              | X | X |       |       |   |
| 366 | 657.8470  | 657.8459  | 4 | C <sub>110</sub> H <sub>190</sub> N <sub>34</sub> O <sub>36</sub> S <sub>1</sub>  | [1677-1690] <sup>5)</sup>    |   | X |       |       |   |
| 367 | 921.4351  | 921.4404  | 5 | C <sub>197</sub> H <sub>304</sub> N <sub>58</sub> O <sub>66</sub> S <sub>2</sub>  | [1691-1719] <sup>6)</sup>    | X | X | K1718 |       |   |
| 368 | 768.0292  | 768.0349  | 6 |                                                                                   |                              | X | X |       |       |   |
| 369 | 807.3816  | 807.3879  | 5 | C <sub>173</sub> H <sub>266</sub> N <sub>52</sub> O <sub>56</sub> S <sub>2</sub>  | [1691-1719] <sup>6, 5)</sup> | X |   |       |       |   |
| 370 | 748.8686  | 748.8772  | 4 | C <sub>136</sub> H <sub>202</sub> N <sub>38</sub> O <sub>37</sub> S <sub>1</sub>  | [1747-1763] <sup>5)</sup>    |   | X | K1747 |       |   |
| 371 | 713.3496  | 713.3566  | 5 | C <sub>160</sub> H <sub>240</sub> N <sub>44</sub> O <sub>47</sub> S <sub>1</sub>  | [1747-1763]                  | X | X |       |       |   |
| 372 | 891.4396  | 891.4444  | 4 |                                                                                   |                              |   |   |       |       | X |
| 373 | 753.3730  | 753.3808  | 4 | C <sub>136</sub> H <sub>204</sub> N <sub>38</sub> O <sub>38</sub> S               | [1747-1763] <sup>5,7)</sup>  |   | H |       |       |   |
| 374 | 602.8984  | 602.9062  | 5 |                                                                                   |                              |   |   |       |       | H |
| 375 | 716.9513  | 716.9592  | 5 | C <sub>160</sub> H <sub>242</sub> N <sub>44</sub> O <sub>48</sub> S               | [1747-1763] <sup>7)</sup>    |   | X |       |       |   |
| 376 | 983.7432  | 983.7432  | 8 | C <sub>351</sub> H <sub>535</sub> N <sub>93</sub> O <sub>111</sub> S <sub>1</sub> | [1748-1803]                  |   | X | K1792 |       |   |
| 377 | 874.5323  | 874.5504  | 9 |                                                                                   |                              |   |   |       |       | X |
| 378 | 1042.5166 | 1042.5243 | 7 | C <sub>327</sub> H <sub>497</sub> N <sub>87</sub> O <sub>101</sub> S <sub>1</sub> | [1748-1803] <sup>5)</sup>    | X | X |       |       |   |
| 379 | 788.5763  | 788.5831  | 5 | C <sub>171</sub> H <sub>264</sub> N <sub>46</sub> O <sub>59</sub> S <sub>1</sub>  | [1783-1803]                  | X | X |       |       |   |
| 380 | 985.4701  | 985.4777  | 4 |                                                                                   |                              |   |   |       |       | X |
| 381 | 842.9059  | 842.9108  | 4 | C <sub>153</sub> H <sub>238</sub> N <sub>44</sub> O <sub>50</sub> S <sub>1</sub>  | [1783-1803] <sup>5)</sup>    | X |   |       |       |   |
| 382 | 757.3567  | 757.3622  | 4 | C <sub>127</sub> H <sub>200</sub> N <sub>38</sub> O <sub>46</sub> S <sub>1</sub>  | [1793-1804]                  | X | X | K1803 |       |   |
| 383 | 606.0854  | 606.0912  | 5 |                                                                                   |                              |   |   |       | X     | X |
| 384 | 614.7904  | 614.7960  | 4 | C <sub>103</sub> H <sub>162</sub> N <sub>32</sub> O <sub>36</sub> S <sub>1</sub>  | [1793-1804] <sup>5)</sup>    | X | X |       |       |   |
| 385 | 485.2308  | 485.2366  | 4 | C <sub>78</sub> H <sub>128</sub> N <sub>28</sub> O <sub>28</sub> S <sub>1</sub>   | [1797-1894] <sup>5)</sup>    | X |   |       |       |   |
| 386 | 502.4345  | 502.4443  | 5 | C <sub>102</sub> H <sub>166</sub> N <sub>34</sub> O <sub>38</sub> S <sub>1</sub>  | [1797-1894]                  | X | X |       |       |   |
| 387 | 711.3338  | 711.3401  | 4 | C <sub>126</sub> H <sub>184</sub> N <sub>36</sub> O <sub>38</sub> S <sub>1</sub>  | [1811-1825] <sup>5)</sup>    | X | X |       | K1817 |   |
| 388 | 853.9001  | 853.9058  | 4 | C <sub>150</sub> H <sub>222</sub> N <sub>42</sub> O <sub>48</sub> S <sub>1</sub>  | [1811-1825]                  | X |   |       |       |   |
| 389 | 600.9977  | 601.0028  | 7 | C <sub>186</sub> H <sub>274</sub> N <sub>50</sub> O <sub>60</sub> S <sub>1</sub>  | [1911-1933]                  | X | X | K1914 |       |   |
| 390 | 700.9961  | 701.0020  | 6 |                                                                                   |                              |   |   |       | X     | X |
| 391 | 840.9955  | 841.0008  | 5 |                                                                                   |                              |   |   |       | X     | X |
| 392 | 1050.9944 | 1050.9990 | 4 |                                                                                   |                              |   |   |       | X     | X |
| 393 | 908.4240  | 908.4327  | 4 | C <sub>162</sub> H <sub>234</sub> N <sub>42</sub> O <sub>52</sub> S <sub>1</sub>  | [1911-1933] <sup>5)</sup>    | X | X |       |       |   |
| 394 | 726.9420  | 726.9478  | 5 |                                                                                   |                              |   |   |       | X     | X |
| 395 | 761.4938  | 761.4997  | 7 | C <sub>237</sub> H <sub>343</sub> N <sub>61</sub> O <sub>78</sub> S <sub>1</sub>  | [1911-1942]                  |   | X |       |       |   |
| 396 | 888.2435  | 888.2484  | 6 |                                                                                   |                              |   |   |       | X     | X |
| 397 | 1065.6906 | 1065.6967 | 5 |                                                                                   |                              |   |   |       | X     | X |
| 398 | 1331.8702 | 1331.8690 | 4 |                                                                                   |                              |   |   |       | X     |   |
| 399 | 793.2019  | 793.2048  | 6 | C <sub>213</sub> H <sub>305</sub> N <sub>55</sub> O <sub>68</sub> S <sub>1</sub>  | [1911-1942] <sup>5)</sup>    | X | X |       |       |   |
| 400 | 951.6411  | 951.6442  | 5 |                                                                                   |                              |   |   | X     | X     |   |
| 401 | 730.5455  | 730.5499  | 5 | C <sub>162</sub> H <sub>238</sub> N <sub>44</sub> O <sub>51</sub> S <sub>1</sub>  | [1911-1933] <sup>5,7)</sup>  |   | H |       |       |   |
| 402 | 608.9525  | 608.9595  | 6 |                                                                                   |                              |   |   |       | H     |   |
| 403 | 844.5950  | 844.6029  | 5 | C <sub>186</sub> H <sub>276</sub> N <sub>50</sub> O <sub>61</sub> S <sub>1</sub>  | [1911-1933] <sup>7)</sup>    |   | H |       |       |   |
| 404 | 703.9959  | 704.0037  | 6 |                                                                                   |                              |   |   |       | H     |   |
| 405 | 603.5682  | 603.5757  | 7 |                                                                                   |                              |   |   |       | H     |   |

|     |           |           |   |                                                                                  |                               |                                                                                  |                           |       |   |   |
|-----|-----------|-----------|---|----------------------------------------------------------------------------------|-------------------------------|----------------------------------------------------------------------------------|---------------------------|-------|---|---|
| 406 | 955.2385  | 955.2463  | 5 | C <sub>213</sub> H <sub>307</sub> N <sub>55</sub> O <sub>69</sub> S <sub>1</sub> | [1911-1942] <sup>5,7)</sup>   |                                                                                  | H                         |       |   |   |
| 407 | 796.1987  | 796.2066  | 6 |                                                                                  |                               |                                                                                  |                           |       | H |   |
| 408 | 1069.2914 | 1069.2993 | 5 | C <sub>237</sub> H <sub>345</sub> N <sub>61</sub> O <sub>79</sub> S <sub>1</sub> | [1911-1942] <sup>7)</sup>     |                                                                                  | H                         |       |   |   |
| 409 | 891.2429  | 891.2507  | 6 |                                                                                  |                               |                                                                                  |                           |       | H |   |
| 410 | 764.0661  | 764.0732  | 7 |                                                                                  |                               |                                                                                  |                           |       | H |   |
| 411 | 668.6835  | 668.6900  | 8 |                                                                                  |                               |                                                                                  |                           |       | H |   |
| 412 | 815.0279  | 815.0357  | 6 | C <sub>216</sub> H <sub>306</sub> N <sub>56</sub> O <sub>73</sub> S <sub>1</sub> | [1915-1942]                   |                                                                                  | X                         | K1933 |   |   |
| 413 | 863.7853  | 863.7833  | 5 | C <sub>192</sub> H <sub>268</sub> N <sub>50</sub> O <sub>63</sub> S <sub>1</sub> | [1915-1942] <sup>5)</sup>     | X                                                                                |                           |       |   |   |
| 414 | 1123.2422 | 1123.2466 | 4 | C <sub>192</sub> H <sub>285</sub> N <sub>51</sub> O <sub>68</sub> S <sub>3</sub> | [1995-2020] <sup>6)</sup>     | X                                                                                | X                         | K2012 |   |   |
| 415 | 1307.2352 | 1307.2386 | 3 | C <sub>168</sub> H <sub>247</sub> N <sub>45</sub> O <sub>58</sub> S <sub>3</sub> | [1995-2020] <sup>6,5)</sup>   | X                                                                                | X                         |       |   |   |
| 416 | 980.6818  | 980.6809  | 4 |                                                                                  |                               |                                                                                  |                           |       |   | X |
| 417 | 1312.5663 | 1312.5703 | 3 | C <sub>168</sub> H <sub>247</sub> N <sub>45</sub> O <sub>59</sub> S <sub>3</sub> | [1995-2020] <sup>6,5,8)</sup> | X                                                                                |                           |       |   |   |
| 418 | 687.5645  | 687.5693  | 4 | C <sub>118</sub> H <sub>179</sub> N <sub>33</sub> O <sub>39</sub> S <sub>2</sub> | [2012-2020]                   | X                                                                                |                           |       |   |   |
| 419 | 795.0286  | 795.0339  | 3 | C <sub>102</sub> H <sub>155</sub> N <sub>27</sub> O <sub>37</sub> S <sub>1</sub> | [2001-2013] <sup>5)</sup>     | X                                                                                |                           |       |   |   |
| 420 | 1192.0433 | 1192.0471 | 2 |                                                                                  |                               |                                                                                  |                           |       | X |   |
| 421 | 1313.2343 | 1313.2422 | 3 | C <sub>168</sub> H <sub>249</sub> N <sub>45</sub> O <sub>59</sub> S <sub>3</sub> | [1995-2020] <sup>5,7)</sup>   |                                                                                  | H                         |       |   |   |
| 422 | 985.1757  | 985.1835  | 4 |                                                                                  |                               |                                                                                  |                           |       | H |   |
| 423 | 902.3935  | 902.4014  | 5 |                                                                                  |                               | C <sub>192</sub> H <sub>287</sub> N <sub>51</sub> O <sub>69</sub> S <sub>3</sub> | [1995-2020] <sup>7)</sup> |       | H |   |
| 424 | 768.1187  | 768.1235  | 4 | C <sub>133</sub> H <sub>209</sub> N <sub>33</sub> O <sub>48</sub> S <sub>1</sub> | [2021-2032]                   | X                                                                                | X                         | K2023 |   |   |
| 425 | 833.7379  | 833.7406  | 3 | C <sub>109</sub> H <sub>171</sub> N <sub>27</sub> O <sub>38</sub> S <sub>1</sub> | [2021-2032] <sup>5)</sup>     | X                                                                                |                           |       |   |   |
| 426 | 795.6244  | 795.6301  | 4 | C <sub>133</sub> H <sub>215</sub> N <sub>37</sub> O <sub>49</sub> S <sub>2</sub> | [2024-2036]                   | X                                                                                | X                         | K2032 |   |   |
| 427 | 1060.5025 | 1060.5049 | 3 |                                                                                  |                               |                                                                                  |                           |       |   | X |
| 428 | 799.6214  | 799.6293  | 4 | C <sub>133</sub> H <sub>215</sub> N <sub>37</sub> O <sub>50</sub> S <sub>2</sub> | [2024-2036] <sup>8)</sup>     |                                                                                  | X                         |       |   |   |
| 429 | 870.4122  | 870.4160  | 3 | C <sub>109</sub> H <sub>177</sub> N <sub>31</sub> O <sub>39</sub> S <sub>2</sub> | [2024-2036] <sup>5)</sup>     | X                                                                                | X                         |       |   |   |
| 430 | 640.3106  | 640.3139  | 4 | C <sub>105</sub> H <sub>176</sub> N <sub>32</sub> O <sub>38</sub> S <sub>2</sub> | [2029-2036]                   | X                                                                                | X                         |       |   |   |
| 431 | 663.3236  | 663.3278  | 3 | C <sub>81</sub> H <sub>138</sub> N <sub>26</sub> O <sub>28</sub> S <sub>2</sub>  | [2029-2036] <sup>5)</sup>     | X                                                                                | X                         |       |   |   |
| 432 | 621.0475  | 621.0463  | 4 | C <sub>101</sub> H <sub>165</sub> N <sub>33</sub> O <sub>36</sub> S <sub>2</sub> | [2032-2038]                   |                                                                                  | X                         |       |   |   |
| 433 | 657.5592  | 657.5670  | 4 | C <sub>109</sub> H <sub>179</sub> N <sub>31</sub> O <sub>40</sub> S <sub>2</sub> | [2024-2036] <sup>5)</sup>     |                                                                                  | X                         |       |   |   |
| 434 | 800.1254  | 800.1332  | 4 | C <sub>133</sub> H <sub>217</sub> N <sub>37</sub> O <sub>50</sub> S <sub>2</sub> | [2024-2036] <sup>5,7)</sup>   |                                                                                  | H                         |       |   |   |
| 435 | 640.3003  | 640.3082  | 5 |                                                                                  |                               |                                                                                  |                           |       | H |   |
| 436 | 1223.3406 | 1223.3533 | 4 | C <sub>213</sub> H <sub>333</sub> N <sub>57</sub> O <sub>73</sub> S <sub>1</sub> | [2095-2127]                   |                                                                                  | X                         | K2100 |   |   |
| 437 | 978.8777  | 978.8836  | 5 |                                                                                  |                               |                                                                                  |                           |       | X | X |
| 438 | 769.7049  | 769.7112  | 6 | C <sub>208</sub> H <sub>306</sub> N <sub>56</sub> O <sub>62</sub> S <sub>1</sub> | [2164-2189]                   | X                                                                                | X                         | K2177 |   |   |
| 439 | 923.4463  | 923.4520  | 5 |                                                                                  |                               |                                                                                  |                           |       | X | X |
| 440 | 608.4424  | 608.4426  | 7 | C <sub>190</sub> H <sub>282</sub> N <sub>52</sub> O <sub>58</sub> S <sub>1</sub> | [2178-2198]                   |                                                                                  | X                         | K2189 |   |   |
| 441 | 709.6754  | 709.6818  | 6 |                                                                                  |                               |                                                                                  |                           |       | X | X |
| 442 | 851.4121  | 851.4166  | 5 |                                                                                  |                               |                                                                                  |                           |       | X | X |
| 443 | 669.3197  | 669.3249  | 6 | C <sub>180</sub> H <sub>264</sub> N <sub>48</sub> O <sub>55</sub> S <sub>1</sub> | [2178-2196]                   | X                                                                                |                           |       |   |   |
| 444 | 860.9156  | 860.9180  | 4 | C <sub>156</sub> H <sub>226</sub> N <sub>42</sub> O <sub>45</sub> S <sub>1</sub> | [2178-2196] <sup>5)</sup>     |                                                                                  | X                         |       |   |   |
| 445 | 688.9298  | 688.9354  | 5 |                                                                                  |                               |                                                                                  |                           |       | X | X |
| 446 | 640.3123  | 640.3174  | 4 | C <sub>112</sub> H <sub>172</sub> N <sub>32</sub> O <sub>35</sub> S <sub>1</sub> | [2178-2190] <sup>5)</sup>     | X                                                                                |                           |       |   |   |

|     |           |           |   |                                                                                  |                             |                                                                                  |                             |       |
|-----|-----------|-----------|---|----------------------------------------------------------------------------------|-----------------------------|----------------------------------------------------------------------------------|-----------------------------|-------|
| 447 | 686.0792  | 686.0838  | 4 | C <sub>116</sub> H <sub>185</sub> N <sub>35</sub> O <sub>38</sub> S <sub>2</sub> | [2197-2206]                 | X                                                                                | X                           | K2198 |
| 448 | 690.0788  | 690.0831  | 4 | C <sub>116</sub> H <sub>185</sub> N <sub>35</sub> O <sub>39</sub> S <sub>2</sub> | [2197-2206] <sup>8)</sup>   | X                                                                                | X                           |       |
| 449 | 729.6816  | 729.6865  | 3 | C <sub>92</sub> H <sub>147</sub> N <sub>29</sub> O <sub>29</sub> S <sub>2</sub>  | [2197-2206] <sup>5,8)</sup> | X                                                                                |                             |       |
| 450 | 724.3543  | 724.3543  | 3 | C <sub>92</sub> H <sub>147</sub> N <sub>29</sub> O <sub>28</sub> S <sub>2</sub>  | [2197-2206] <sup>5)</sup>   | X                                                                                | X                           |       |
| 451 | 548.0129  | 548.0208  | 4 | C <sub>92</sub> H <sub>149</sub> N <sub>29</sub> O <sub>29</sub> S <sub>2</sub>  | [2197-2206] <sup>5,7)</sup> |                                                                                  | H                           |       |
| 452 | 690.5792  | 690.5870  | 4 | C <sub>116</sub> H <sub>187</sub> N <sub>35</sub> O <sub>39</sub> S <sub>2</sub> | [2197-2206] <sup>7)</sup>   |                                                                                  | H                           |       |
| 453 | 552.6633  | 552.6711  | 5 |                                                                                  |                             |                                                                                  | H                           |       |
| 454 | 694.5779  | 694.5858  | 4 |                                                                                  |                             | C <sub>116</sub> H <sub>187</sub> N <sub>35</sub> O <sub>40</sub> S <sub>2</sub> | [2197-2206] <sup>7,8)</sup> |       |
| 455 | 555.8623  | 555.8701  | 5 |                                                                                  |                             |                                                                                  |                             | H     |
| 456 | 771.1319  | 771.1357  | 4 | C <sub>135</sub> H <sub>209</sub> N <sub>39</sub> O <sub>42</sub> S <sub>1</sub> | [2297-2308]                 | X                                                                                | X                           | K2307 |
| 457 | 1027.8387 | 1027.8457 | 3 |                                                                                  |                             |                                                                                  | X                           |       |
| 458 | 837.7528  | 837.7569  | 3 | C <sub>111</sub> H <sub>171</sub> N <sub>33</sub> O <sub>32</sub> S <sub>1</sub> | [2297-2308] <sup>5)</sup>   | X                                                                                |                             |       |
| 459 | 633.0648  | 633.0727  | 4 | C <sub>111</sub> H <sub>173</sub> N <sub>33</sub> O <sub>33</sub> S              | [2297-2308] <sup>5,7)</sup> |                                                                                  | H                           |       |
| 460 | 775.6311  | 775.6389  | 4 | C <sub>135</sub> H <sub>211</sub> N <sub>39</sub> O <sub>43</sub> S              | [2297-2308] <sup>7)</sup>   |                                                                                  | H                           |       |
| 461 | 620.7048  | 620.7127  | 5 |                                                                                  |                             | H                                                                                |                             |       |
| 462 | 681.3348  | 681.3368  | 4 | C <sub>117</sub> H <sub>184</sub> N <sub>34</sub> O <sub>39</sub> S <sub>1</sub> | [2341-2350]                 |                                                                                  | X                           | K2341 |
| 463 | 545.271   | 545.2709  | 5 |                                                                                  |                             | X                                                                                | X                           |       |
| 464 | 538.7654  | 538.7711  | 4 | C <sub>93</sub> H <sub>146</sub> N <sub>28</sub> O <sub>29</sub> S <sub>1</sub>  | [2341-2350] <sup>5)</sup>   | X                                                                                | X                           |       |
| 465 | 872.9209  | 872.9280  | 4 | C <sub>154</sub> H <sub>234</sub> N <sub>42</sub> O <sub>49</sub> S <sub>1</sub> | [2336-2351]                 | X                                                                                | X                           | K2350 |
| 466 | 698.5386  | 698.5444  | 5 |                                                                                  |                             |                                                                                  | X                           |       |
| 467 | 702.1387  | 702.1465  | 5 | C <sub>154</sub> H <sub>236</sub> N <sub>42</sub> O <sub>50</sub> S              | [2342-2357] <sup>7)</sup>   |                                                                                  | H                           |       |
| 468 | 1177.5658 | 1177.5736 | 4 | C <sub>205</sub> H <sub>320</sub> N <sub>54</sub> O <sub>69</sub> S <sub>2</sub> | [2351-2376]                 |                                                                                  | X                           | K2373 |
| 469 | 942.2552  | 942.2605  | 5 |                                                                                  |                             |                                                                                  | X                           |       |
| 470 | 785.3799  | 785.3850  | 6 |                                                                                  |                             |                                                                                  | X                           |       |
| 471 | 763.3593  | 763.3685  | 5 | C <sub>162</sub> H <sub>258</sub> N <sub>44</sub> O <sub>58</sub> S <sub>2</sub> | [2358-2376]                 |                                                                                  | X                           |       |
| 472 | 795.0334  | 795.0388  | 3 | C <sub>98</sub> H <sub>159</sub> N <sub>29</sub> O <sub>36</sub> S <sub>2</sub>  | [2363-2374] <sup>5,8)</sup> | X                                                                                |                             |       |
| 473 | 735.0918  | 735.0984  | 4 | C <sub>122</sub> H <sub>197</sub> N <sub>35</sub> O <sub>45</sub> S <sub>2</sub> | [2363-2374]                 | X                                                                                |                             |       |
| 474 | 695.9886  | 695.9973  | 3 | C <sub>86</sub> H <sub>140</sub> N <sub>24</sub> O <sub>34</sub> S <sub>1</sub>  | [2371-2374]                 |                                                                                  | X                           |       |
| 475 | 945.8584  | 945.8626  | 5 | C <sub>205</sub> H <sub>322</sub> N <sub>54</sub> O <sub>70</sub> S <sub>2</sub> | [2351-2376] <sup>7)</sup>   |                                                                                  | H                           |       |
| 476 | 788.3812  | 788.3868  | 6 |                                                                                  |                             |                                                                                  | H                           |       |
| 477 | 831.5651  | 831.5729  | 6 |                                                                                  |                             | C <sub>215</sub> H <sub>339</sub> N <sub>57</sub> O <sub>75</sub> S <sub>2</sub> | [2351-2378] <sup>7,8)</sup> |       |
| 478 | 550.7694  | 550.7692  | 4 | C <sub>91</sub> H <sub>150</sub> N <sub>26</sub> O <sub>35</sub> S <sub>1</sub>  | [2374-2378]                 | X                                                                                |                             | K2376 |
| 479 | 518.5057  | 518.5091  | 4 | C <sub>86</sub> H <sub>143</sub> N <sub>25</sub> O <sub>32</sub> S <sub>1</sub>  | [2375-2378]                 |                                                                                  | X                           |       |
| 480 | 555.2646  | 555.2724  | 4 | C <sub>91</sub> H <sub>152</sub> N <sub>26</sub> O <sub>36</sub> S               | [2374-2378] <sup>7)</sup>   |                                                                                  | H                           |       |
| 481 | 622.5489  | 622.5503  | 4 | C <sub>102</sub> H <sub>163</sub> N <sub>35</sub> O <sub>36</sub> S <sub>1</sub> | [2377-2383]                 | X                                                                                | X                           | K2378 |
| 482 | 498.2405  | 498.2417  | 5 |                                                                                  |                             | X                                                                                | X                           |       |
| 483 | 870.8114  | 870.8119  | 5 | C <sub>189</sub> H <sub>285</sub> N <sub>55</sub> O <sub>58</sub> S <sub>3</sub> | [2406-2434] <sup>5,6)</sup> | X                                                                                |                             | K2423 |
| 484 | 820.8884  | 820.8882  | 6 | C <sub>213</sub> H <sub>323</sub> N <sub>61</sub> O <sub>68</sub> S <sub>3</sub> | [2406-2434] <sup>6)</sup>   | X                                                                                | X                           |       |
| 485 | 907.2075  | 907.2154  | 5 | C <sub>192</sub> H <sub>291</sub> N <sub>57</sub> O <sub>65</sub> S <sub>3</sub> | [2406-2431] <sup>6)</sup>   |                                                                                  | X                           |       |
| 486 | 756.17295 | 756.1808  | 6 |                                                                                  |                             | X                                                                                |                             |       |
| 487 | 760.8677  | 760.8616  | 4 | C <sub>133</sub> H <sub>202</sub> N <sub>36</sub> O <sub>44</sub> S <sub>1</sub> | [2432-2443]                 |                                                                                  | X                           | K2434 |



|     |          |          |   |                                                                                  |                             |   |   |       |
|-----|----------|----------|---|----------------------------------------------------------------------------------|-----------------------------|---|---|-------|
| 488 | 814.9004 | 814.9055 | 4 | C <sub>136</sub> H <sub>226</sub> N <sub>38</sub> O <sub>52</sub> S <sub>1</sub> | [2506-2520]                 | X | X | K2506 |
| 489 | 655.7207 | 655.7285 | 5 | C <sub>136</sub> H <sub>228</sub> N <sub>38</sub> O <sub>53</sub> S              | [2506-2520] <sup>7)</sup>   |   | H |       |
| 490 | 901.0845 | 901.0895 | 3 | C <sub>113</sub> H <sub>177</sub> N <sub>33</sub> O <sub>42</sub> S <sub>1</sub> | [2632-2640]                 |   | X | K2633 |
| 491 | 676.0688 | 676.0685 | 4 |                                                                                  |                             | X | X |       |
| 492 | 541.0452 | 541.0563 | 5 |                                                                                  |                             | X |   |       |
| 493 | 710.9965 | 711.0006 | 3 | C <sub>89</sub> H <sub>139</sub> N <sub>27</sub> O <sub>32</sub> S <sub>1</sub>  | [2632-2640] <sup>5)</sup>   | X | X |       |
| 494 | 776.8408 | 776.8596 | 4 | C <sub>135</sub> H <sub>198</sub> N <sub>38</sub> O <sub>45</sub> S <sub>1</sub> | [2632-2648] <sup>5)</sup>   |   | X |       |
| 495 | 735.7323 | 735.7421 | 5 | C <sub>159</sub> H <sub>236</sub> N <sub>44</sub> O <sub>55</sub> S <sub>1</sub> | [2632-2648]                 | X | X |       |
| 496 | 919.4194 | 919.4264 | 4 |                                                                                  |                             |   | X |       |
| 497 | 537.9976 | 538.0045 | 4 | C <sub>89</sub> H <sub>141</sub> N <sub>27</sub> O <sub>33</sub> S <sub>1</sub>  | [2632-2640] <sup>5,7)</sup> |   | H |       |
| 498 | 680.5639 | 680.5717 | 4 | C <sub>113</sub> H <sub>179</sub> N <sub>33</sub> O <sub>43</sub> S <sub>1</sub> | [2632-2640] <sup>7)</sup>   |   | H |       |
| 499 | 544.6511 | 544.6589 | 5 |                                                                                  |                             |   | H |       |
| 500 | 694.9178 | 694.9235 | 5 | C <sub>144</sub> H <sub>228</sub> N <sub>44</sub> O <sub>50</sub> S <sub>3</sub> | [2719-2734] <sup>6)</sup>   | X |   | K2733 |
| 501 | 725.8292 | 725.8369 | 4 | C <sub>120</sub> H <sub>190</sub> N <sub>38</sub> O <sub>40</sub> S <sub>3</sub> | [2719-2734] <sup>6,5)</sup> | X | X |       |
| 502 | 581.9518 | 581.9597 | 3 | C <sub>71</sub> H <sub>122</sub> N <sub>24</sub> O <sub>23</sub> S <sub>2</sub>  | [2729-2734] <sup>5)</sup>   |   | X |       |
| 503 | 726.7763 | 726.7827 | 7 | C <sub>221</sub> H <sub>334</sub> N <sub>66</sub> O <sub>71</sub> S <sub>1</sub> | [2734-2763]                 |   | X | K2754 |
| 504 | 726.6769 | 726.6848 | 6 | C <sub>191</sub> H <sub>284</sub> N <sub>56</sub> O <sub>60</sub> S <sub>1</sub> | [2735-2763] <sup>5)</sup>   |   | X |       |
| 505 | 633.0611 | 633.0606 | 4 | C <sub>108</sub> H <sub>173</sub> N <sub>31</sub> O <sub>35</sub> S <sub>2</sub> | [2773-2780]                 | X | X | K2779 |
| 506 | 843.7501 | 843.7462 | 3 |                                                                                  |                             |   | X |       |
| 507 | 637.0525 | 637.0604 | 4 | C <sub>108</sub> H <sub>173</sub> N <sub>31</sub> O <sub>36</sub> S <sub>2</sub> | [2773-2780] <sup>8)</sup>   |   | X |       |
| 508 | 653.6531 | 653.6573 | 3 | C <sub>84</sub> H <sub>135</sub> N <sub>25</sub> O <sub>25</sub> S <sub>2</sub>  | [2773-2780] <sup>5)</sup>   | X | X |       |
| 509 | 649.0696 | 649.0695 | 4 | C <sub>109</sub> H <sub>177</sub> N <sub>31</sub> O <sub>40</sub> S <sub>1</sub> | [2780-2787]                 | X | X | K2780 |
| 510 | 741.6782 | 741.6836 | 3 | C <sub>92</sub> H <sub>147</sub> N <sub>27</sub> O <sub>35</sub> S <sub>1</sub>  | [2780-2784]                 | X | X |       |
| 511 | 556.5066 | 556.5146 | 4 |                                                                                  |                             | X | X |       |
| 512 | 551.5897 | 551.5953 | 3 | C <sub>68</sub> H <sub>109</sub> N <sub>21</sub> O <sub>25</sub> S <sub>1</sub>  | [2780-2784] <sup>5)</sup>   | X |   |       |
| 513 | 570.6890 | 570.6868 | 5 | C <sub>120</sub> H <sub>197</sub> N <sub>35</sub> O <sub>43</sub> S <sub>1</sub> | [2780-2789]                 | X | X | K2787 |
| 514 | 713.1091 | 713.1079 | 4 |                                                                                  |                             | X | X |       |
| 515 | 570.5374 | 570.5422 | 4 | C <sub>96</sub> H <sub>159</sub> N <sub>29</sub> O <sub>33</sub> S <sub>1</sub>  | [2780-2789] <sup>5)</sup>   | X | X |       |
| 516 | 907.7743 | 907.7765 | 3 | C <sub>114</sub> H <sub>185</sub> N <sub>33</sub> O <sub>42</sub> S <sub>1</sub> | [2781-2789]                 | X | X |       |
| 517 | 681.084  | 681.0842 | 4 |                                                                                  |                             | X | X |       |
| 518 | 545.0617 | 545.0693 | 5 |                                                                                  |                             |   | X |       |
| 519 | 717.6835 | 717.6887 | 3 | C <sub>90</sub> H <sub>147</sub> N <sub>27</sub> O <sub>32</sub> S <sub>1</sub>  | [2781-2789] <sup>5)</sup>   | X | X |       |
| 520 | 554.0216 | 554.0276 | 4 | C <sub>92</sub> H <sub>153</sub> N <sub>27</sub> O <sub>34</sub> S <sub>1</sub>  | [2785-2789]                 | X | X |       |
| 521 | 548.2741 | 548.2793 | 3 | C <sub>68</sub> H <sub>115</sub> N <sub>21</sub> O <sub>24</sub> S <sub>1</sub>  | [2785-2789] <sup>5)</sup>   | X | X |       |
| 522 | 574.2838 | 574.2902 | 5 | C <sub>120</sub> H <sub>199</sub> N <sub>35</sub> O <sub>44</sub> S              | [2780-2789] <sup>7)</sup>   |   | H |       |
| 523 | 685.5795 | 685.5873 | 4 | C <sub>114</sub> H <sub>187</sub> N <sub>33</sub> O <sub>43</sub> S              | [2781-2789] <sup>7)</sup>   |   | H |       |
| 524 | 548.6636 | 548.6714 | 5 |                                                                                  |                             |   | H |       |
| 525 | 861.4252 | 861.4325 | 4 | C <sub>150</sub> H <sub>236</sub> N <sub>42</sub> O <sub>49</sub> S <sub>1</sub> | [2790-2805]                 |   | X | K2804 |
| 526 | 689.3420 | 689.3470 | 5 |                                                                                  |                             | X | X |       |
| 527 | 574.6190 | 574.6237 | 6 |                                                                                  |                             | X | X |       |
| 528 | 718.8617 | 718.8663 | 4 | C <sub>126</sub> H <sub>198</sub> N <sub>36</sub> O <sub>39</sub> S <sub>1</sub> | [2790-2805] <sup>5)</sup>   | X | X |       |

|     |           |           |   |                                                                                  |                             |   |   |       |
|-----|-----------|-----------|---|----------------------------------------------------------------------------------|-----------------------------|---|---|-------|
| 529 | 748.3428  | 748.3491  | 6 | C <sub>195</sub> H <sub>294</sub> N <sub>52</sub> O <sub>64</sub> S <sub>3</sub> | [2845-2867]                 | X | X | K2852 |
| 530 | 897.8124  | 897.8175  | 5 |                                                                                  |                             | X | X |       |
| 531 | 901.0119  | 901.0165  | 5 | C <sub>195</sub> H <sub>294</sub> N <sub>52</sub> O <sub>65</sub> S <sub>3</sub> | [2845-2867] <sup>8)</sup>   | X | X |       |
| 532 | 979.4478  | 979.4539  | 4 | C <sub>171</sub> H <sub>256</sub> N <sub>46</sub> O <sub>54</sub> S <sub>3</sub> | [2845-2867] <sup>5)</sup>   | X | X |       |
| 533 | 783.7573  | 783.7651  | 5 |                                                                                  |                             | X | X |       |
| 534 | 872.4211  | 872.4246  | 3 | C <sub>112</sub> H <sub>179</sub> N <sub>31</sub> O <sub>37</sub> S <sub>2</sub> | [2845-2857] <sup>5)</sup>   | X | X |       |
| 535 | 797.1331  | 797.1365  | 4 | C <sub>136</sub> H <sub>217</sub> N <sub>37</sub> O <sub>47</sub> S <sub>2</sub> | [2845-2857]                 | X |   |       |
| 536 | 1027.4949 | 1027.4937 | 5 | C <sub>222</sub> H <sub>346</sub> N <sub>60</sub> O <sub>74</sub> S <sub>3</sub> | [2853-2882]                 | X | X | K2874 |
| 537 | 856.4172  | 856.4126  | 6 |                                                                                  |                             | X | X |       |
| 538 | 734.2055  | 734.2123  | 7 |                                                                                  |                             |   | X |       |
| 539 | 736.4999  | 736.4974  | 7 | C <sub>222</sub> H <sub>346</sub> N <sub>60</sub> O <sub>75</sub> S <sub>3</sub> | [2853-2882] <sup>8)</sup>   |   | X |       |
| 540 | 913.4352  | 913.4412  | 5 | C <sub>198</sub> H <sub>308</sub> N <sub>54</sub> O <sub>64</sub> S <sub>3</sub> | [2853-2882] <sup>5)</sup>   | X | X |       |
| 541 | 761.3627  | 761.3690  | 6 |                                                                                  |                             | X | X |       |
| 542 | 799.6550  | 799.6605  | 4 | C <sub>136</sub> H <sub>227</sub> N <sub>37</sub> O <sub>49</sub> S <sub>1</sub> | [2868-2882]                 | X | X |       |
| 543 | 875.7863  | 875.7899  | 3 | C <sub>112</sub> H <sub>189</sub> N <sub>31</sub> O <sub>39</sub> S <sub>1</sub> | [2868-2882] <sup>5)</sup>   | X | X |       |
| 544 | 661.5896  | 661.5975  | 4 | C <sub>112</sub> H <sub>191</sub> N <sub>31</sub> O <sub>40</sub> S <sub>1</sub> | [2868-2882] <sup>5,7)</sup> |   | H |       |
| 545 | 804.1558  | 804.1637  | 4 | C <sub>136</sub> H <sub>229</sub> N <sub>37</sub> O <sub>50</sub> S <sub>1</sub> | [2868-2882] <sup>7)</sup>   |   | H |       |
| 546 | 643.5247  | 643.5325  | 5 |                                                                                  |                             |   | H |       |
| 547 | 721.1510  | 721.1589  | 5 | C <sub>153</sub> H <sub>249</sub> N <sub>43</sub> O <sub>53</sub> S <sub>2</sub> | [2875-2893]                 |   | X | K2882 |
| 548 | 758.6255  | 758.6304  | 4 | C <sub>129</sub> H <sub>211</sub> N <sub>37</sub> O <sub>43</sub> S <sub>2</sub> | [2875-2893] <sup>5)</sup>   | X | X |       |
| 549 | 810.3817  | 810.3806  | 4 | C <sub>135</sub> H <sub>212</sub> N <sub>42</sub> O <sub>47</sub> S <sub>2</sub> | [2883-2897]                 | X | X | K2893 |
| 550 | 534.4468  | 534.4535  | 5 | C <sub>111</sub> H <sub>174</sub> N <sub>36</sub> O <sub>37</sub> S <sub>2</sub> | [2883-2897] <sup>5)</sup>   | X |   |       |
| 551 | 667.8070  | 667.8149  | 4 |                                                                                  |                             | X |   |       |
| 552 | 496.4720  | 496.4776  | 4 | C <sub>81</sub> H <sub>123</sub> N <sub>29</sub> O <sub>28</sub> S <sub>1</sub>  | [2888-2896] <sup>5)</sup>   | X | X |       |
| 553 | 517.2222  | 517.2278  | 4 | C <sub>84</sub> H <sub>124</sub> N <sub>30</sub> O <sub>30</sub> S <sub>1</sub>  | [2897-2904]                 | X |   | K2897 |
| 554 | 538.5373  | 538.5460  | 7 | C <sub>158</sub> H <sub>243</sub> N <sub>53</sub> O <sub>53</sub> S <sub>1</sub> | [2894-2910]                 |   | X |       |
| 555 | 674.3219  | 674.3275  | 5 | C <sub>140</sub> H <sub>223</sub> N <sub>45</sub> O <sub>50</sub> S <sub>1</sub> | [2910-2924]                 | X | X | K2910 |
| 556 | 562.1007  | 562.1080  | 6 |                                                                                  |                             |   | X |       |
| 557 | 481.9446  | 481.9508  | 7 |                                                                                  |                             |   | X |       |
| 558 | 700.0848  | 700.0919  | 4 | C <sub>116</sub> H <sub>185</sub> N <sub>39</sub> O <sub>40</sub> S <sub>1</sub> | [2910-2924] <sup>5)</sup>   | X |   |       |
| 559 | 855.3878  | 855.3939  | 6 | C <sub>222</sub> H <sub>328</sub> N <sub>62</sub> O <sub>75</sub> S <sub>2</sub> | [2925-2955] <sup>6)</sup>   | X | X | K2929 |
| 560 | 926.0916  | 926.0959  | 3 | C <sub>116</sub> H <sub>182</sub> N <sub>32</sub> O <sub>45</sub> S <sub>1</sub> | [2925-2934]                 | X |   |       |
| 561 | 1103.5052 | 1103.5077 | 2 | C <sub>92</sub> H <sub>144</sub> N <sub>26</sub> O <sub>35</sub> S <sub>1</sub>  | [2925-2934] <sup>5)</sup>   | X |   |       |
| 562 | 736.0046  | 736.0076  | 3 |                                                                                  |                             | X |   |       |
| 563 | 994.0436  | 994.0474  | 5 | C <sub>211</sub> H <sub>313</sub> N <sub>61</sub> O <sub>75</sub> S <sub>2</sub> | [2930-2959] <sup>6)</sup>   | X | X | K2955 |
| 564 | 828.5431  | 828.5405  | 6 |                                                                                  |                             | X | X |       |
| 565 | 710.3166  | 710.3215  | 7 |                                                                                  |                             | X | X |       |
| 566 | 733.4903  | 733.4969  | 6 | C <sub>187</sub> H <sub>275</sub> N <sub>55</sub> O <sub>65</sub> S <sub>2</sub> | [2930-2959] <sup>6,5)</sup> | X |   |       |
| 567 | 879.9897  | 879.9948  | 5 |                                                                                  |                             | X | X |       |
| 568 | 1099.7371 | 1099.7415 | 4 |                                                                                  |                             | X |   |       |
| 569 | 712.8871  | 712.8950  | 7 | C <sub>211</sub> H <sub>315</sub> N <sub>61</sub> O <sub>76</sub> S <sub>2</sub> | [2930-2959] <sup>6,7)</sup> |   | H |       |

|     |           |           |   |                                                                                  |                             |                                                                                 |                           |       |
|-----|-----------|-----------|---|----------------------------------------------------------------------------------|-----------------------------|---------------------------------------------------------------------------------|---------------------------|-------|
| 570 | 930.443   | 930.4433  | 6 | C <sub>252</sub> H <sub>362</sub> N <sub>66</sub> O <sub>77</sub> S <sub>1</sub> | [2987-3021]                 | X                                                                               | X                         | K2987 |
| 571 | 1116.3256 | 1116.3304 | 5 |                                                                                  |                             | X                                                                               | X                         |       |
| 572 | 1395.1649 | 1395.1613 | 4 |                                                                                  |                             | X                                                                               | X                         |       |
| 573 | 912.7641  | 912.7693  | 3 | C <sub>118</sub> H <sub>182</sub> N <sub>32</sub> O <sub>41</sub> S <sub>1</sub> | [3038-3047]                 | X                                                                               | X                         | K3044 |
| 574 | 684.8226  | 684.8293  | 4 |                                                                                  | X                           |                                                                                 |                           |       |
| 575 | 1083.5169 | 1083.5178 | 2 | C <sub>94</sub> H <sub>144</sub> N <sub>26</sub> O <sub>31</sub> S <sub>1</sub>  | [3038-3047] <sup>5)</sup>   | X                                                                               | X                         |       |
| 576 | 722.6833  | 722.6815  | 3 |                                                                                  |                             | X                                                                               |                           |       |
| 577 | 841.0538  | 841.0609  | 3 | C <sub>109</sub> H <sub>165</sub> N <sub>29</sub> O <sub>38</sub> S <sub>1</sub> | [3038-3047] <sup>9)</sup>   | X                                                                               |                           |       |
| 578 | 842.7167  | 842.7211  | 3 | C <sub>105</sub> H <sub>168</sub> N <sub>28</sub> O <sub>40</sub> S <sub>2</sub> | [3087-3094]                 | X                                                                               | X                         | K3087 |
| 579 | 848.0482  | 848.0533  | 3 | C <sub>105</sub> H <sub>168</sub> N <sub>28</sub> O <sub>41</sub> S <sub>2</sub> | [3087-3094] <sup>8)</sup>   | X                                                                               | X                         |       |
| 580 | 978.4405  | 978.4455  | 2 | C <sub>81</sub> H <sub>130</sub> N <sub>22</sub> O <sub>30</sub> S <sub>2</sub>  | [3087-3094] <sup>5)</sup>   | X                                                                               | X                         |       |
| 581 | 652.6338  | 652.6333  | 3 |                                                                                  |                             | X                                                                               |                           |       |
| 582 | 986.4429  | 986.4435  | 2 | C <sub>81</sub> H <sub>130</sub> N <sub>22</sub> O <sub>31</sub> S <sub>2</sub>  | [3087-3094] <sup>5,8)</sup> |                                                                                 | X                         |       |
| 583 | 657.9644  | 657.9650  | 3 |                                                                                  |                             | X                                                                               |                           |       |
| 584 | 935.1105  | 935.1184  | 3 | C <sub>119</sub> H <sub>191</sub> N <sub>33</sub> O <sub>41</sub> S <sub>2</sub> | [3078-3094] <sup>5)</sup>   |                                                                                 | X                         |       |
| 585 | 940.4458  | 940.4500  | 3 | C <sub>119</sub> H <sub>191</sub> N <sub>33</sub> O <sub>42</sub> S <sub>2</sub> | [3078-3094] <sup>5,8)</sup> | X                                                                               | X                         |       |
| 586 | 848.1564  | 848.1557  | 4 | C <sub>143</sub> H <sub>229</sub> N <sub>39</sub> O <sub>52</sub> S <sub>2</sub> | [3078-3094] <sup>8)</sup>   |                                                                                 | X                         |       |
| 587 | 844.1477  | 844.1564  | 4 | C <sub>143</sub> H <sub>229</sub> N <sub>39</sub> O <sub>51</sub> S <sub>2</sub> | [3078-3094]                 | X                                                                               | X                         |       |
| 588 | 1027.5074 | 1027.5261 | 3 | C <sub>137</sub> H <sub>214</sub> N <sub>38</sub> O <sub>41</sub> S <sub>1</sub> | [3112-3122]                 |                                                                                 | X                         | K3121 |
| 589 | 770.8859  | 770.8965  | 4 |                                                                                  |                             |                                                                                 | X                         |       |
| 590 | 837.4347  | 837.4373  | 3 | C <sub>113</sub> H <sub>176</sub> N <sub>32</sub> O <sub>31</sub> S <sub>1</sub> | [3112-3122] <sup>5)</sup>   | X                                                                               |                           |       |
| 591 | 528.7609  | 528.7686  | 4 | C <sub>87</sub> H <sub>146</sub> N <sub>28</sub> O <sub>31</sub> S <sub>1</sub>  | [3119-3122]                 |                                                                                 | X                         |       |
| 592 | 772.1672  | 772.1728  | 5 | C <sub>168</sub> H <sub>254</sub> N <sub>48</sub> O <sub>55</sub> S <sub>1</sub> | [3170-3192] <sup>5)</sup>   | X                                                                               |                           | K3173 |
| 593 | 1107.5271 | 1107.5309 | 4 | C <sub>192</sub> H <sub>292</sub> N <sub>54</sub> O <sub>65</sub> S <sub>1</sub> | [3170-3192]                 |                                                                                 | X                         |       |
| 594 | 886.2199  | 886.2258  | 5 |                                                                                  |                             | X                                                                               | X                         |       |
| 595 | 738.6832  | 738.6893  | 6 |                                                                                  |                             | X                                                                               | X                         |       |
| 596 | 780.1026  | 780.1085  | 4 | C <sub>135</sub> H <sub>197</sub> N <sub>39</sub> O <sub>45</sub> S <sub>1</sub> | [3170-3186] <sup>5)</sup>   | X                                                                               |                           |       |
| 597 | 775.7676  | 775.7755  | 5 | C <sub>168</sub> H <sub>256</sub> N <sub>48</sub> O <sub>56</sub> S <sub>1</sub> | [3170-3192] <sup>5,7)</sup> |                                                                                 | H                         |       |
| 598 | 741.6838  | 741.6917  | 6 | C <sub>192</sub> H <sub>294</sub> N <sub>54</sub> O <sub>66</sub> S <sub>1</sub> | [3170-3192] <sup>7)</sup>   |                                                                                 | H                         |       |
| 599 | 691.0121  | 691.0128  | 3 | C <sub>85</sub> H <sub>143</sub> N <sub>27</sub> O <sub>31</sub> S <sub>1</sub>  | [3170-3192]                 |                                                                                 | X                         | K3197 |
| 600 | 518.5114  | 518.5114  | 4 |                                                                                  |                             |                                                                                 | X                         |       |
| 601 | 418.6054  | 418.6132  | 5 |                                                                                  |                             | C <sub>85</sub> H <sub>145</sub> N <sub>27</sub> O <sub>32</sub> S <sub>1</sub> | [3196-3199] <sup>7)</sup> |       |
| 602 | 897.1288  | 897.1337  | 3 | C <sub>117</sub> H <sub>193</sub> N <sub>31</sub> O <sub>39</sub> S <sub>1</sub> | [3211-3220]                 | X                                                                               | X                         | K3216 |
| 603 | 673.0966  | 673.1021  | 4 |                                                                                  |                             | X                                                                               | X                         |       |
| 604 | 707.0405  | 707.0454  | 3 | C <sub>93</sub> H <sub>155</sub> N <sub>25</sub> O <sub>29</sub> S <sub>1</sub>  | [3211-3220] <sup>5)</sup>   | X                                                                               | X                         |       |
| 605 | 713.0416  | 713.0494  | 3 | C <sub>93</sub> H <sub>155</sub> N <sub>25</sub> O <sub>29</sub> S <sub>1</sub>  | [3211-3220] <sup>5,7)</sup> |                                                                                 | H                         |       |
| 606 | 677.5974  | 677.6053  | 4 | C <sub>117</sub> H <sub>193</sub> N <sub>31</sub> O <sub>39</sub> S <sub>1</sub> | [3211-3220] <sup>7)</sup>   |                                                                                 | H                         |       |
| 607 | 542.2779  | 542.2858  | 5 |                                                                                  |                             |                                                                                 | H                         |       |
| 608 | 1155.5181 | 1155.5214 | 4 | C <sub>198</sub> H <sub>296</sub> N <sub>52</sub> O <sub>72</sub> S <sub>2</sub> | [3221-3248]                 |                                                                                 | X                         |       |
| 609 | 953.9506  | 953.9567  | 4 | C <sub>169</sub> H <sub>254</sub> N <sub>44</sub> O <sub>53</sub> S <sub>2</sub> | [3229-3248]                 | X                                                                               |                           |       |
| 610 | 957.9491  | 957.9554  | 4 | C <sub>169</sub> H <sub>254</sub> N <sub>44</sub> O <sub>54</sub> S <sub>2</sub> | [3229-3248] <sup>8)</sup>   | X                                                                               |                           |       |

|     |           |           |   |                                                                                   |                             |   |   |       |  |
|-----|-----------|-----------|---|-----------------------------------------------------------------------------------|-----------------------------|---|---|-------|--|
| 611 | 770.3733  | 770.3792  | 3 | C <sub>101</sub> H <sub>157</sub> N <sub>27</sub> O <sub>33</sub> S <sub>1</sub>  | [3229-3241] <sup>5)</sup>   | X | X |       |  |
| 612 | 1155.0667 | 1155.0652 | 2 |                                                                                   |                             | X |   |       |  |
| 613 | 841.0892  | 841.0883  | 3 | C <sub>110</sub> H <sub>173</sub> N <sub>31</sub> O <sub>35</sub> S <sub>1</sub>  | [3270-3276]                 | X | X | K3275 |  |
| 614 | 631.068   | 631.0681  | 4 |                                                                                   |                             | X | X |       |  |
| 615 | 505.0491  | 505.0565  | 5 |                                                                                   | X                           |   |   |       |  |
| 616 | 650.9940  | 651.0005  | 3 | C <sub>86</sub> H <sub>135</sub> N <sub>25</sub> O <sub>25</sub> S <sub>1</sub>   | [3270-3276] <sup>5)</sup>   | X | X |       |  |
| 617 | 488.4945  | 488.5024  | 4 |                                                                                   |                             |   | X |       |  |
| 618 | 555.2761  | 555.2757  | 4 | C <sub>95</sub> H <sub>152</sub> N <sub>26</sub> O <sub>33</sub> S <sub>1</sub>   | [3272-3276]                 | X | X |       |  |
| 619 | 549.9365  | 549.9440  | 3 | C <sub>71</sub> H <sub>114</sub> N <sub>20</sub> O <sub>23</sub> S <sub>1</sub>   | [3272-3276] <sup>5)</sup>   | X | X |       |  |
| 620 | 635.5634  | 635.5712  | 4 | C <sub>110</sub> H <sub>175</sub> N <sub>31</sub> O <sub>36</sub> S <sub>1</sub>  | [3270-3276] <sup>7)</sup>   |   | H |       |  |
| 621 | 508.6507  | 508.6586  | 5 |                                                                                   |                             |   | H |       |  |
| 622 | 783.9791  | 783.9850  | 7 | C <sub>243</sub> H <sub>390</sub> N <sub>66</sub> O <sub>76</sub> S <sub>1</sub>  | [3276-3310]                 |   | X | K3276 |  |
| 623 | 914.488   | 914.4807  | 6 |                                                                                   |                             | X | X |       |  |
| 624 | 1097.1795 | 1097.1753 | 5 |                                                                                   | X                           | X |   |       |  |
| 625 | 819.4311  | 819.4370  | 6 | C <sub>219</sub> H <sub>352</sub> N <sub>60</sub> O <sub>66</sub> S <sub>1</sub>  | [3276-3310] <sup>5)</sup>   | X | X |       |  |
| 626 | 1228.6438 | 1228.6516 | 4 |                                                                                   |                             |   | X |       |  |
| 627 | 926.9636  | 926.9707  | 4 | C <sub>161</sub> H <sub>258</sub> N <sub>44</sub> O <sub>54</sub> S <sub>1</sub>  | [3276-3294]                 |   | X |       |  |
| 628 | 741.7731  | 741.7776  | 5 |                                                                                   |                             | X | X |       |  |
| 629 | 917.4802  | 917.4830  | 6 | C <sub>243</sub> H <sub>392</sub> N <sub>66</sub> O <sub>77</sub> S <sub>1</sub>  | [3276-3310] <sup>7)</sup>   |   | H |       |  |
| 630 | 786.5534  | 786.5579  | 7 |                                                                                   |                             |   | H |       |  |
| 631 | 781.5326  | 781.5407  | 8 | C <sub>278</sub> H <sub>447</sub> N <sub>75</sub> O <sub>86</sub> S <sub>1</sub>  | [3276-3317]                 |   | X | K3310 |  |
| 632 | 893.0420  | 893.0454  | 7 |                                                                                   |                             | X |   |       |  |
| 633 | 826.2252  | 826.2304  | 5 | C <sub>181</sub> H <sub>292</sub> N <sub>50</sub> O <sub>58</sub> S <sub>1</sub>  | [3295-3317]                 | X | X |       |  |
| 634 | 1032.5346 | 1032.5363 | 4 |                                                                                   |                             | X | X |       |  |
| 635 | 889.9662  | 889.9700  | 4 | C <sub>157</sub> H <sub>254</sub> N <sub>44</sub> O <sub>48</sub> S <sub>1</sub>  | [3295-3317] <sup>5)</sup>   |   | X |       |  |
| 636 | 1020.3621 | 1020.3692 | 6 | C <sub>272</sub> H <sub>435</sub> N <sub>73</sub> O <sub>85</sub> S <sub>1</sub>  | [3277-3317]                 |   | X |       |  |
| 637 | 874.7403  | 874.7456  | 7 |                                                                                   |                             | X | X |       |  |
| 638 | 829.8252  | 829.8331  | 5 | C <sub>181</sub> H <sub>294</sub> N <sub>50</sub> O <sub>59</sub> S <sub>1</sub>  | [3295-3317]                 |   | X |       |  |
| 639 | 694.6140  | 694.6141  | 4 | C <sub>120</sub> H <sub>199</sub> N <sub>33</sub> O <sub>40</sub> S <sub>1</sub>  | [3311-3321]                 | X | X | K3317 |  |
| 640 | 962.2581  | 962.2645  | 5 | C <sub>207</sub> H <sub>332</sub> N <sub>54</sub> O <sub>67</sub> S <sub>5</sub>  | [3322-3350]                 |   | X | K3325 |  |
| 641 | 968.6546  | 968.6625  | 5 | C <sub>207</sub> H <sub>332</sub> N <sub>54</sub> O <sub>69</sub> S <sub>5</sub>  | [3322-3350] <sup>8)</sup>   |   | X |       |  |
| 642 | 965.4556  | 965.4635  | 5 | C <sub>207</sub> H <sub>332</sub> N <sub>54</sub> O <sub>68</sub> S <sub>5</sub>  | [3322-3350] <sup>8)</sup>   |   | X |       |  |
| 643 | 968.6537  | 968.6625  | 5 | C <sub>207</sub> H <sub>332</sub> N <sub>54</sub> O <sub>69</sub> S <sub>5</sub>  | [3322-3350] <sup>8)</sup>   | X | X |       |  |
| 644 | 942.4276  | 942.4312  | 3 | C <sub>118</sub> H <sub>189</sub> N <sub>31</sub> O <sub>43</sub> S <sub>3</sub>  | [3323-3333]                 | X | X |       |  |
| 645 | 969.0578  | 969.0656  | 5 | C <sub>207</sub> H <sub>334</sub> N <sub>54</sub> O <sub>69</sub> S <sub>5</sub>  | [3322-3350] <sup>7,8)</sup> |   | H |       |  |
| 646 | 1164.0449 | 1164.0432 | 4 | C <sub>200</sub> H <sub>318</sub> N <sub>50</sub> O <sub>65</sub> S <sub>6</sub>  | [3326-3352] <sup>6)</sup>   | X | X | K3350 |  |
| 647 | 1168.0371 | 1168.0425 | 4 | C <sub>200</sub> H <sub>318</sub> N <sub>50</sub> O <sub>66</sub> S <sub>6</sub>  | [3326-3352] <sup>6,8)</sup> | X |   |       |  |
| 648 | 833.6492  | 833.6523  | 4 | C <sub>148</sub> H <sub>223</sub> N <sub>39</sub> O <sub>45</sub> S <sub>2</sub>  | [3351-3365] <sup>6)</sup>   | X | X | K3352 |  |
| 649 | 667.1186  | 667.1233  | 5 |                                                                                   |                             | X | X |       |  |
| 650 | 691.0803  | 691.0866  | 4 | C <sub>124</sub> H <sub>185</sub> N <sub>33</sub> O <sub>35</sub> S <sub>2</sub>  | [3351-3365] <sup>6,5)</sup> | X | X |       |  |
| 651 | 1148.6885 | 1148.6906 | 6 | C <sub>299</sub> H <sub>445</sub> N <sub>79</sub> O <sub>101</sub> S <sub>4</sub> | [3353-3398]                 | X | X | K3365 |  |

|     |           |           |   |                                                                                  |                           |   |   |
|-----|-----------|-----------|---|----------------------------------------------------------------------------------|---------------------------|---|---|
| 652 | 984.739   | 984.7358  | 7 |                                                                                  |                           | X | X |
| 653 | 1192.5357 | 1192.5397 | 5 | C <sub>258</sub> H <sub>385</sub> N <sub>67</sub> O <sub>88</sub> S <sub>4</sub> | [3353-3390] <sup>8)</sup> | X |   |
| 654 | 832.0572  | 832.0583  | 3 | C <sub>105</sub> H <sub>168</sub> N <sub>28</sub> O <sub>38</sub> S <sub>2</sub> | [3363-3370]               | X | X |
| 655 | 837.3845  | 837.3900  | 3 | C <sub>105</sub> H <sub>168</sub> N <sub>28</sub> O <sub>39</sub> S <sub>2</sub> | [3363-3370] <sup>8)</sup> | X | X |
| 656 | 962.4481  | 962.4506  | 2 | C <sub>81</sub> H <sub>130</sub> N <sub>22</sub> O <sub>28</sub> S <sub>2</sub>  | [3363-3370] <sup>5)</sup> | X | X |
| 657 | 641.9653  | 641.9700  | 3 |                                                                                  |                           | X | X |

<sup>1)</sup> Numbers inside brackets correspond to the position of the proteolytic peptide within the sequence of KLH2. All peptides from KLH2 shown in this table are linked to (C<sup>1</sup>-K<sup>16</sup>) fragment of Cys<sup>1</sup>pP0, except those peptides where it is specified if they are linked to (C<sup>1</sup>-K<sup>11</sup>), (C<sup>1</sup>-K<sup>14</sup>) or (C<sup>1</sup>-K<sup>17</sup>) fragment of Cys<sup>1</sup>pP0.

<sup>2)</sup> Identification of type 2 peptides in the KLH2-Cys<sup>1</sup>pP0 conjugate using pLink2 software [2].

<sup>3)</sup> Identification of type 2 peptides in the KLH2-Cys<sup>1</sup>pP0 conjugate using Kojak software [3].

<sup>4)</sup> Indicates the position where the peptide Cys<sup>1</sup>pP0 is added by the Michael addition to the free amino groups in the Lys residues or *N*-terminus of the KLH2.

<sup>5)</sup> Peptide from KLH1 linked to (C<sup>1</sup>-K<sup>11</sup>) fragment of Cys<sup>1</sup>pP0

<sup>6)</sup> Carbamidomethylation of Cys

<sup>7)</sup> Identification of type 2 peptides with the hydrolyzed linker

<sup>8)</sup> Met→ Met sulfoxide

<sup>9)</sup> Peptide from KLH1 linked to (C<sup>1</sup>-K<sup>14</sup>) fragment of Cys<sup>1</sup>pP0

**Table S7.** Identification of conjugation sites in KLH2-Cys<sup>1</sup>pP0 conjugate using Kojak [2] and pLink2 [3] software. Type 2 peptides were identified using transcyclized and hydrolyzer linker.

| #  | <i>m/z</i> exp. | <i>m/z</i> theor. | <i>z</i> | Elemental composition                                                            | Assignment <sup>1)</sup>  | pLink <sup>2)</sup> | Kojak <sup>3)</sup> | Conjugation site <sup>4)</sup> |   |
|----|-----------------|-------------------|----------|----------------------------------------------------------------------------------|---------------------------|---------------------|---------------------|--------------------------------|---|
| 1  | 907.4576        | 907.4655          | 2        | C <sub>75</sub> H <sub>128</sub> N <sub>24</sub> O <sub>26</sub> S               | [1-7] <sup>5)</sup>       |                     | X                   | Nt                             |   |
| 2  | 605.3050        | 605.3129          | 3        |                                                                                  |                           |                     | X                   |                                |   |
| 3  | 795.3933        | 795.4012          | 3        | C <sub>99</sub> H <sub>166</sub> N <sub>30</sub> O <sub>36</sub> S               | [1-7]                     |                     | X                   |                                |   |
| 4  | 596.7950        | 596.8029          | 4        |                                                                                  |                           |                     | X                   |                                |   |
| 5  | 477.6360        | 477.6439          | 5        |                                                                                  |                           |                     | X                   |                                |   |
| 6  | 601.2979        | 601.3055          | 4        | C <sub>99</sub> H <sub>166</sub> N <sub>30</sub> O <sub>37</sub> S               | [1-7] <sup>6)</sup>       |                     | H                   |                                |   |
| 7  | 503.2550        | 503.2628          | 5        | C <sub>105</sub> H <sub>178</sub> N <sub>32</sub> O <sub>37</sub> S              | [1-7] <sup>7)</sup>       |                     | X                   |                                |   |
| 8  | 854.1786        | 854.1860          | 4        | C <sub>143</sub> H <sub>241</sub> N <sub>41</sub> O <sub>53</sub> S              | [1-22] <sup>5)</sup>      |                     | X                   | K7                             |   |
| 9  | 996.7448        | 996.7527          | 4        | C <sub>167</sub> H <sub>279</sub> N <sub>47</sub> O <sub>63</sub> S              | [1-22]                    |                     | X                   |                                |   |
| 10 | 797.5958        | 797.6037          | 5        |                                                                                  |                           |                     | X                   |                                |   |
| 11 | 801.1958        | 801.2058          | 5        | C <sub>167</sub> H <sub>281</sub> N <sub>47</sub> O <sub>64</sub> S              | [1-22] <sup>6)</sup>      |                     | H                   |                                |   |
| 12 | 1045.9611       | 1045.9690         | 2        | C <sub>83</sub> H <sub>135</sub> N <sub>25</sub> O <sub>36</sub> S               | [7-17] <sup>5)</sup>      |                     | X                   |                                |   |
| 13 | 887.7290        | 887.7369          | 3        | C <sub>107</sub> H <sub>173</sub> N <sub>31</sub> O <sub>46</sub> S              | [7-17]                    |                     | X                   |                                |   |
| 14 | 915.44443       | 915.4523          | 3        | C <sub>114</sub> H <sub>190</sub> N <sub>32</sub> O <sub>44</sub> S              | [7-22] <sup>5)</sup>      | X                   | X                   |                                |   |
| 15 | 829.4017        | 829.4074          | 4        | C <sub>138</sub> H <sub>228</sub> N <sub>38</sub> O <sub>54</sub> S              | [7-22]                    | X                   | X                   |                                |   |
| 16 | 1477.4248       | 1477.4322         | 4        | C <sub>247</sub> H <sub>389</sub> N <sub>69</sub> O <sub>93</sub> S <sub>3</sub> | [8-52] <sup>5,8)</sup>    |                     | X                   | K22                            |   |
| 17 | 1176.0241       | 1176.0320         | 4        | C <sub>196</sub> H <sub>302</sub> N <sub>58</sub> O <sub>71</sub> S <sub>3</sub> | [23-55] <sup>5,8)</sup>   |                     | X                   | K52                            |   |
| 18 | 941.01926       | 941.0272          | 5        |                                                                                  |                           |                     | X                   |                                |   |
| 19 | 944.2197        | 944.2261          | 5        | C <sub>196</sub> H <sub>302</sub> N <sub>58</sub> O <sub>72</sub> S <sub>3</sub> | [23-55] <sup>5,8,9)</sup> | X                   |                     |                                |   |
| 20 | 1318.5976       | 1318.5983         | 4        | C <sub>220</sub> H <sub>340</sub> N <sub>64</sub> O <sub>81</sub> S <sub>3</sub> | [23-55] <sup>8)</sup>     | X                   | X                   |                                |   |
| 21 | 1055.0799       | 1055.0801         | 5        |                                                                                  |                           |                     | X                   |                                | X |
| 22 | 879.4011        | 879.4014          | 6        |                                                                                  |                           |                     | X                   |                                | X |
| 23 | 756.4802        | 756.4896          | 7        | C <sub>220</sub> H <sub>342</sub> N <sub>64</sub> O <sub>82</sub> S <sub>3</sub> | [23-55] <sup>8,6)</sup>   |                     | H                   |                                |   |
| 24 | 1058.2797       | 1058.2792         | 5        | C <sub>220</sub> H <sub>340</sub> N <sub>64</sub> O <sub>82</sub> S <sub>3</sub> | [23-55] <sup>8,9)</sup>   | X                   | X                   |                                |   |
| 25 | 882.0594        | 882.0673          | 6        |                                                                                  |                           |                     | X                   | X                              |   |
| 26 | 763.3396        | 763.3475          | 3        | C <sub>96</sub> H <sub>142</sub> N <sub>32</sub> O <sub>32</sub> S               | [117-127] <sup>5)</sup>   |                     | X                   | K119                           |   |
| 27 | 572.7547        | 572.7625          | 4        |                                                                                  |                           |                     | X                   |                                | X |
| 28 | 715.32192       | 715.3288          | 4        | C <sub>120</sub> H <sub>180</sub> N <sub>38</sub> O <sub>42</sub> S              | [117-127]                 | X                   |                     |                                |   |
| 29 | 572.45842       | 572.4646          | 5        |                                                                                  |                           |                     | X                   |                                |   |
| 30 | 1026.1641       | 1026.1619         | 3        | C <sub>134</sub> H <sub>202</sub> N <sub>40</sub> O <sub>42</sub> S <sub>1</sub> | [120-136] <sup>5)</sup>   | X                   | X                   | K135                           |   |
| 31 | 769.8740        | 769.8734          | 4        |                                                                                  |                           |                     | X                   |                                | X |
| 32 | 616.1002        | 616.1002          | 5        |                                                                                  |                           |                     | X                   |                                | X |
| 33 | 1216.2505       | 1216.2501         | 3        | C <sub>158</sub> H <sub>240</sub> N <sub>46</sub> O <sub>52</sub> S <sub>1</sub> | [120-136]                 | X                   | X                   |                                |   |
| 34 | 912.4400        | 912.4396          | 4        |                                                                                  |                           |                     | X                   |                                | X |
| 35 | 730.1538        | 730.1533          | 5        |                                                                                  |                           |                     | X                   |                                | X |
| 36 | 608.6288        | 608.6290          | 6        |                                                                                  |                           |                     | X                   |                                | X |
| 37 | 619.6924        | 619.7023          | 5        | C <sub>134</sub> H <sub>204</sub> N <sub>40</sub> O <sub>43</sub> S <sub>1</sub> | [120-136] <sup>5,6)</sup> |                     | H                   |                                |   |
| 38 | 916.9351        | 916.9422          | 4        | C <sub>158</sub> H <sub>242</sub> N <sub>46</sub> O <sub>53</sub> S <sub>1</sub> | [120-136] <sup>6)</sup>   |                     | H                   |                                |   |
| 39 | 733.7454        | 733.7554          | 5        |                                                                                  |                           |                     |                     | H                              |   |
| 40 | 611.6211        | 611.6307          | 6        |                                                                                  |                           |                     |                     | H                              |   |
| 41 | 1024.0102       | 1024.0181         | 2        | C <sub>88</sub> H <sub>143</sub> N <sub>25</sub> O <sub>29</sub> S <sub>1</sub>  | [128-136] <sup>5)</sup>   | X                   |                     |                                |   |
| 42 | 683.0157        | 683.0146          | 3        |                                                                                  |                           |                     | X                   |                                |   |
| 43 | 873.1030        | 873.1030          | 3        | C <sub>112</sub> H <sub>181</sub> N <sub>31</sub> O <sub>39</sub> S <sub>1</sub> | [128-136]                 | X                   |                     |                                |   |

|    |           |           |   |                                                                                  |                             |   |   |             |
|----|-----------|-----------|---|----------------------------------------------------------------------------------|-----------------------------|---|---|-------------|
| 44 | 655.0790  | 655.0792  | 4 |                                                                                  |                             | X | X |             |
| 45 | 515.4950  | 515.5028  | 4 | C <sub>83</sub> H <sub>139</sub> N <sub>27</sub> O <sub>32</sub> S               | [136-139]                   |   | X | <b>K136</b> |
| 46 | 641.3182  | 641.3242  | 4 | C <sub>107</sub> H <sub>176</sub> N <sub>34</sub> O <sub>37</sub> S              | [136-148] <sup>5)</sup>     | X |   |             |
| 47 | 513.2546  | 513.2609  | 5 |                                                                                  |                             | X |   |             |
| 48 | 627.3134  | 627.3140  | 5 | C <sub>131</sub> H <sub>214</sub> N <sub>40</sub> O <sub>47</sub> S <sub>1</sub> | [136-148]                   | X | X |             |
| 49 | 522.9293  | 522.9296  | 6 |                                                                                  |                             | X | X |             |
| 50 | 873.9180  | 873.9258  | 6 | C <sub>222</sub> H <sub>353</sub> N <sub>67</sub> O <sub>74</sub> S <sub>3</sub> | [137-172] <sup>5,8)</sup>   | X |   | <b>K148</b> |
| 51 | 876.5838  | 876.5917  | 6 | C <sub>222</sub> H <sub>353</sub> N <sub>67</sub> O <sub>75</sub> S <sub>3</sub> | [137-172] <sup>5,8,9)</sup> |   | X |             |
| 52 | 968.9621  | 968.9700  | 6 | C <sub>246</sub> H <sub>391</sub> N <sub>73</sub> O <sub>84</sub> S <sub>3</sub> | [137-172] <sup>8)</sup>     |   | X |             |
| 53 | 832.9668  | 832.9747  | 7 | C <sub>246</sub> H <sub>391</sub> N <sub>73</sub> O <sub>85</sub> S <sub>3</sub> | [137-172] <sup>8,9)</sup>   | X | X |             |
| 54 | 596.2871  | 596.2949  | 6 | C <sub>151</sub> H <sub>238</sub> N <sub>48</sub> O <sub>51</sub> S <sub>1</sub> | [140-156]                   |   | X |             |
| 55 | 612.3069  | 612.3071  | 4 | C <sub>105</sub> H <sub>164</sub> N <sub>34</sub> O <sub>32</sub> S <sub>1</sub> | [145-156] <sup>5)</sup>     | X | X |             |
| 56 | 490.0476  | 490.0473  | 5 |                                                                                  |                             | X | X |             |
| 57 | 754.8726  | 754.8734  | 4 | C <sub>129</sub> H <sub>202</sub> N <sub>40</sub> O <sub>42</sub> S <sub>1</sub> | [145-156]                   | X | X |             |
| 58 | 604.0999  | 604.1002  | 5 |                                                                                  |                             | X | X |             |
| 59 | 503.5841  | 503.5848  | 6 |                                                                                  |                             | X | X |             |
| 60 | 526.2548  | 526.2612  | 5 | C <sub>109</sub> H <sub>175</sub> N <sub>37</sub> O <sub>37</sub> S              | [148-156]                   | X |   |             |
| 61 | 876.9180  | 876.9276  | 6 | C <sub>222</sub> H <sub>355</sub> N <sub>67</sub> O <sub>75</sub> S <sub>3</sub> | [137-172] <sup>6,5)</sup>   |   | H |             |
| 62 | 971.9621  | 971.9717  | 6 | C <sub>246</sub> H <sub>393</sub> N <sub>73</sub> O <sub>85</sub> S <sub>3</sub> | [137-172] <sup>6)</sup>     |   | H |             |
| 63 | 616.8019  | 616.8098  | 4 | C <sub>105</sub> H <sub>166</sub> N <sub>34</sub> O <sub>33</sub> S <sub>1</sub> | [145-156] <sup>6,5)</sup>   |   | H |             |
| 64 | 493.6415  | 493.6494  | 5 |                                                                                  |                             |   | H |             |
| 65 | 759.3677  | 759.3760  | 4 | C <sub>129</sub> H <sub>204</sub> N <sub>40</sub> O <sub>43</sub> S <sub>1</sub> | [145-156] <sup>6)</sup>     |   | H |             |
| 66 | 607.6924  | 607.7023  | 5 |                                                                                  |                             |   | H |             |
| 67 | 506.5770  | 506.5866  | 6 |                                                                                  |                             |   | H |             |
| 68 | 905.6509  | 905.6588  | 4 | C <sub>150</sub> H <sub>231</sub> N <sub>47</sub> O <sub>52</sub> S <sub>3</sub> | [230-252] <sup>5,8)</sup>   |   | X | <b>K231</b> |
| 69 | 724.7207  | 724.7286  | 5 |                                                                                  |                             | X | X |             |
| 70 | 727.9207  | 727.9276  | 5 | C <sub>150</sub> H <sub>231</sub> N <sub>47</sub> O <sub>53</sub> S <sub>3</sub> | [230-252] <sup>5,8,9)</sup> | X |   |             |
| 71 | 838.7754  | 838.7816  | 5 | C <sub>174</sub> H <sub>269</sub> N <sub>53</sub> O <sub>62</sub> S <sub>3</sub> | [230-252] <sup>8)</sup>     | X | X |             |
| 72 | 701.8110  | 701.8184  | 6 | C <sub>174</sub> H <sub>269</sub> N <sub>53</sub> O <sub>63</sub> S <sub>3</sub> | [230-252] <sup>8,9)</sup>   | X | X |             |
| 73 | 775.0266  | 775.0275  | 6 | C <sub>193</sub> H <sub>302</sub> N <sub>60</sub> O <sub>68</sub> S <sub>3</sub> | [230-261] <sup>5,8)</sup>   | X | X |             |
| 74 | 870.0695  | 870.0717  | 6 | C <sub>217</sub> H <sub>340</sub> N <sub>66</sub> O <sub>78</sub> S <sub>3</sub> | [230-261] <sup>8)</sup>     | X | X |             |
| 75 | 872.7302  | 872.7375  | 6 | C <sub>217</sub> H <sub>340</sub> N <sub>66</sub> O <sub>79</sub> S <sub>3</sub> | [230-261] <sup>8,9)</sup>   | X |   |             |
| 76 | 623.2757  | 623.2836  | 4 | C <sub>105</sub> H <sub>156</sub> N <sub>32</sub> O <sub>37</sub> S              | [262-274] <sup>5)</sup>     |   | X | <b>K265</b> |
| 77 | 765.8486  | 765.8490  | 4 | C <sub>129</sub> H <sub>194</sub> N <sub>38</sub> O <sub>47</sub> S <sub>1</sub> | [262-274]                   | X | X |             |
| 78 | 612.8839  | 612.8814  | 5 |                                                                                  |                             | X | X |             |
| 79 | 627.7788  | 627.7862  | 4 | C <sub>105</sub> H <sub>158</sub> N <sub>32</sub> O <sub>38</sub> S              | [262-274] <sup>5,6)</sup>   |   | H |             |
| 80 | 502.4230  | 502.4305  | 5 |                                                                                  |                             |   | H |             |
| 81 | 770.3451  | 770.3525  | 4 | C <sub>129</sub> H <sub>196</sub> N <sub>38</sub> O <sub>48</sub> S <sub>1</sub> | [262-274] <sup>6)</sup>     |   | H |             |
| 82 | 616.4761  | 616.4835  | 5 |                                                                                  |                             |   | H |             |
| 83 | 513.8967  | 513.9042  | 6 |                                                                                  |                             |   | H |             |
| 84 | 524.5907  | 524.5919  | 3 | C <sub>63</sub> H <sub>106</sub> N <sub>22</sub> O <sub>23</sub> S <sub>1</sub>  | [300-304] <sup>5)</sup>     |   | X | <b>K302</b> |
| 85 | 720.6757  | 720.6837  | 3 | C <sub>87</sub> H <sub>146</sub> N <sub>28</sub> O <sub>34</sub> S               | [300-304] <sup>6)</sup>     |   | H |             |
| 86 | 540.7568  | 540.7648  | 4 |                                                                                  |                             |   | H |             |
| 87 | 432.8054  | 432.8134  | 5 |                                                                                  |                             |   | H |             |
| 88 | 1063.8282 | 1063.8361 | 3 | C <sub>145</sub> H <sub>209</sub> N <sub>37</sub> O <sub>41</sub> S <sub>2</sub> | [340-358] <sup>5)</sup>     |   | X |             |
| 89 | 798.1291  | 798.1290  | 4 |                                                                                  |                             | X | X |             |
| 90 | 1253.9211 | 1253.9244 | 3 | C <sub>169</sub> H <sub>247</sub> N <sub>43</sub> O <sub>51</sub> S <sub>2</sub> | [340-358]                   | X | X |             |

|     |           |           |   |                                                                                  |                           |                                                                                  |                         |             |             |             |             |             |             |             |             |             |             |             |             |             |             |             |             |             |             |             |
|-----|-----------|-----------|---|----------------------------------------------------------------------------------|---------------------------|----------------------------------------------------------------------------------|-------------------------|-------------|-------------|-------------|-------------|-------------|-------------|-------------|-------------|-------------|-------------|-------------|-------------|-------------|-------------|-------------|-------------|-------------|-------------|-------------|
| 91  | 940.6943  | 940.6953  | 4 |                                                                                  |                           | X                                                                                | X                       | <b>K353</b> |             |             |             |             |             |             |             |             |             |             |             |             |             |             |             |             |             |             |
| 92  | 752.7499  | 752.7578  | 5 |                                                                                  |                           |                                                                                  | X                       |             | <b>K353</b> |             |             |             |             |             |             |             |             |             |             |             |             |             |             |             |             |             |
| 93  | 944.6950  | 944.6953  | 4 | C <sub>169</sub> H <sub>247</sub> N <sub>43</sub> O <sub>52</sub> S <sub>2</sub> | [340-358] <sup>9)</sup>   | X                                                                                | X                       |             |             | <b>K353</b> |             |             |             |             |             |             |             |             |             |             |             |             |             |             |             |             |
| 94  | 981.1113  | 981.1191  | 6 | C <sub>266</sub> H <sub>374</sub> N <sub>68</sub> O <sub>81</sub> S <sub>2</sub> | [340-382] <sup>5)</sup>   | X                                                                                | X                       |             |             |             | <b>K353</b> |             |             |             |             |             |             |             |             |             |             |             |             |             |             |             |
| 95  | 841.0954  | 841.1032  | 7 |                                                                                  |                           |                                                                                  |                         |             |             |             |             |             | X           | <b>K353</b> |             |             |             |             |             |             |             |             |             |             |             |             |
| 96  | 1076.1554 | 1076.1633 | 6 | C <sub>290</sub> H <sub>412</sub> N <sub>74</sub> O <sub>91</sub> S <sub>2</sub> | [340-382]                 | X                                                                                | X                       |             |             |             |             | <b>K353</b> |             |             |             |             |             |             |             |             |             |             |             |             |             |             |
| 97  | 922.5618  | 922.5696  | 7 |                                                                                  |                           |                                                                                  |                         |             |             |             |             |             | X           |             | X           | <b>K353</b> |             |             |             |             |             |             |             |             |             |             |
| 98  | 807.3666  | 807.3745  | 8 |                                                                                  |                           |                                                                                  |                         |             |             |             |             |             |             |             | X           |             | <b>K353</b> |             |             |             |             |             |             |             |             |             |
| 99  | 1078.8212 | 1078.8291 | 6 |                                                                                  |                           |                                                                                  |                         |             |             |             |             |             |             |             | X           |             |             | <b>K353</b> |             |             |             |             |             |             |             |             |
| 100 | 924.8478  | 924.8546  | 7 | C <sub>290</sub> H <sub>412</sub> N <sub>74</sub> O <sub>92</sub> S <sub>2</sub> | [340-382] <sup>9)</sup>   | X                                                                                | X                       |             |             |             |             |             | <b>K353</b> |             |             |             |             |             |             |             |             |             |             |             |             |             |
| 101 | 809.3659  | 809.3738  | 8 |                                                                                  |                           |                                                                                  |                         |             |             |             |             |             |             |             |             |             |             |             | X           | <b>K353</b> |             |             |             |             |             |             |
| 102 | 662.3027  | 662.3106  | 3 |                                                                                  |                           | C <sub>88</sub> H <sub>129</sub> N <sub>25</sub> O <sub>24</sub> S <sub>2</sub>  | [352-358] <sup>5)</sup> |             |             |             |             |             |             |             | X           |             |             |             | X           |             | <b>K353</b> |             |             |             |             |             |
| 103 | 667.6369  | 667.6423  | 3 | C <sub>88</sub> H <sub>129</sub> N <sub>25</sub> O <sub>25</sub> S <sub>2</sub>  | [352-358] <sup>5,9)</sup> | X                                                                                | X                       |             |             |             |             |             |             |             | <b>K353</b> |             |             |             |             |             |             |             |             |             |             |             |
| 104 | 643.5420  | 643.5499  | 4 | C <sub>112</sub> H <sub>167</sub> N <sub>31</sub> O <sub>35</sub> S <sub>2</sub> | [352-358] <sup>9)</sup>   | X                                                                                | X                       |             |             |             |             |             |             |             |             |             |             |             | <b>K353</b> |             |             |             |             |             |             |             |
| 105 | 945.1905  | 945.1979  | 4 | C <sub>169</sub> H <sub>249</sub> N <sub>43</sub> O <sub>52</sub> S <sub>2</sub> | [340-358] <sup>6)</sup>   |                                                                                  | H                       |             |             |             |             |             |             |             |             |             |             |             |             |             |             | <b>K353</b> |             |             |             |             |
| 106 | 756.3524  | 756.3599  | 5 |                                                                                  |                           |                                                                                  |                         |             |             |             |             |             |             |             |             |             |             |             |             |             |             |             |             | H           | <b>K353</b> |             |
| 107 | 759.5511  | 759.5589  | 5 | C <sub>169</sub> H <sub>249</sub> N <sub>43</sub> O <sub>53</sub> S <sub>2</sub> | [340-358] <sup>6,9)</sup> |                                                                                  | H                       |             |             |             |             |             |             |             |             |             |             |             |             |             |             |             | <b>K353</b> |             |             |             |
| 108 | 984.1128  | 984.1209  | 6 | C <sub>266</sub> H <sub>376</sub> N <sub>68</sub> O <sub>82</sub> S <sub>2</sub> | [340-382] <sup>5,6)</sup> |                                                                                  | H                       |             |             |             |             |             |             |             |             |             |             |             |             |             |             |             |             | <b>K353</b> |             |             |
| 109 | 756.7852  | 756.7921  | 5 | C <sub>165</sub> H <sub>263</sub> N <sub>49</sub> O <sub>51</sub> S              | [407-427]                 | X                                                                                |                         | <b>K409</b> |             |             |             |             |             |             |             |             |             |             |             |             |             |             |             |             |             |             |
| 110 | 659.6284  | 659.6354  | 7 | C <sub>202</sub> H <sub>324</sub> N <sub>62</sub> O <sub>60</sub> S <sub>1</sub> | [400-427]                 |                                                                                  | X                       | <b>K414</b> |             |             |             |             |             |             |             |             |             |             |             |             |             |             |             |             |             |             |
| 111 | 729.1179  | 729.1257  | 4 | C <sub>127</sub> H <sub>201</sub> N <sub>39</sub> O <sub>38</sub> S              | [410-427] <sup>5)</sup>   |                                                                                  | X                       |             | <b>K414</b> |             |             |             |             |             |             |             |             |             |             |             |             |             |             |             |             |             |
| 112 | 871.6841  | 871.6920  | 4 | C <sub>151</sub> H <sub>239</sub> N <sub>45</sub> O <sub>48</sub> S              | [410-427]                 |                                                                                  | X                       |             |             | <b>K414</b> |             |             |             |             |             |             |             |             |             |             |             |             |             |             |             |             |
| 113 | 697.5500  | 697.5551  | 5 |                                                                                  |                           |                                                                                  |                         |             |             |             | X           |             |             | X           |             |             |             |             |             |             |             |             |             |             |             | <b>K414</b> |
| 114 | 1014.5306 | 1014.5300 | 3 | C <sub>133</sub> H <sub>213</sub> N <sub>41</sub> O <sub>39</sub> S <sub>1</sub> | [410-428] <sup>5)</sup>   |                                                                                  | X                       |             |             |             | <b>K414</b> |             |             |             |             |             |             |             |             |             |             |             |             |             |             |             |
| 115 | 761.1416  | 761.1495  | 4 |                                                                                  |                           |                                                                                  |                         |             |             |             |             |             |             | X           |             | <b>K414</b> |             |             |             |             |             |             |             |             |             |             |
| 116 | 609.1210  | 609.1212  | 5 |                                                                                  |                           |                                                                                  |                         |             |             |             |             | X           |             | X           |             |             | <b>K414</b> |             |             |             |             |             |             |             |             |             |
| 117 | 1204.6104 | 1204.6183 | 3 |                                                                                  |                           |                                                                                  |                         |             |             |             |             |             |             | X           |             |             |             | <b>K414</b> |             |             |             |             |             |             |             |             |
| 118 | 903.7161  | 903.7157  | 4 | C <sub>157</sub> H <sub>251</sub> N <sub>47</sub> O <sub>49</sub> S <sub>1</sub> | [410-428]                 | X                                                                                | X                       |             |             |             |             | <b>K414</b> |             |             |             |             |             |             |             |             |             |             |             |             |             |             |
| 119 | 723.1746  | 723.1741  | 5 |                                                                                  |                           |                                                                                  |                         |             |             |             |             |             | X           | X           |             |             |             |             |             | <b>K414</b> |             |             |             |             |             |             |
| 120 | 602.8055  | 602.8130  | 6 |                                                                                  |                           |                                                                                  |                         |             |             |             |             |             | X           | X           |             |             |             |             |             |             | <b>K414</b> |             |             |             |             |             |
| 121 | 516.8330  | 516.8409  | 7 |                                                                                  |                           |                                                                                  |                         |             |             |             |             |             |             | X           | <b>K414</b> |             |             |             |             |             |             |             |             |             |             |             |
| 122 | 765.6441  | 765.6521  | 4 | C <sub>133</sub> H <sub>215</sub> N <sub>41</sub> O <sub>40</sub> S <sub>1</sub> | [410-428] <sup>5,6)</sup> |                                                                                  | H                       |             |             |             |             |             | <b>K414</b> |             |             |             |             |             |             |             |             |             |             |             |             |             |
| 123 | 510.7628  | 510.7707  | 6 |                                                                                  |                           |                                                                                  |                         |             |             |             |             |             |             |             |             |             |             |             | H           |             |             | <b>K414</b> |             |             |             |             |
| 124 | 908.2117  | 908.2183  | 4 | C <sub>157</sub> H <sub>253</sub> N <sub>47</sub> O <sub>50</sub> S <sub>1</sub> | [410-428] <sup>6)</sup>   |                                                                                  | H                       |             |             |             |             |             |             | <b>K414</b> |             |             |             |             |             |             |             |             |             |             |             |             |
| 125 | 726.7694  | 726.7762  | 5 |                                                                                  |                           |                                                                                  |                         |             |             |             |             |             |             |             |             |             |             |             |             |             |             |             | H           |             | <b>K414</b> |             |
| 126 | 605.8078  | 605.8148  | 6 |                                                                                  |                           |                                                                                  |                         |             |             |             |             |             |             |             |             |             |             |             |             |             |             |             | H           | <b>K414</b> |             |             |
| 127 | 519.4067  | 519.4138  | 7 |                                                                                  |                           |                                                                                  |                         |             |             |             |             |             |             |             |             |             |             |             |             |             |             |             | H           |             |             |             |
| 128 | 922.1135  | 922.1123  | 3 |                                                                                  |                           | C <sub>115</sub> H <sub>186</sub> N <sub>34</sub> O <sub>43</sub> S <sub>1</sub> | [428-442] <sup>5)</sup> | X           |             |             |             |             |             |             |             |             |             |             | X           |             |             |             | <b>K428</b> |             |             |             |
| 129 | 834.3945  | 834.4024  | 4 | C <sub>139</sub> H <sub>224</sub> N <sub>40</sub> O <sub>53</sub> S              | [428-442]                 |                                                                                  | X                       | <b>K428</b> |             |             |             |             |             |             |             |             |             |             |             |             |             |             |             |             |             |             |
| 130 | 1114.2825 | 1114.2806 | 4 | C <sub>186</sub> H <sub>297</sub> N <sub>55</sub> O <sub>68</sub> S <sub>2</sub> | [429-452]                 | X                                                                                | X                       |             | <b>K443</b> |             |             |             |             |             |             |             |             |             |             |             |             |             |             |             |             |             |
| 131 | 743.1893  | 743.1898  | 6 |                                                                                  |                           |                                                                                  |                         | X           |             |             |             |             |             |             |             |             |             |             | <b>K443</b> |             |             |             |             |             |             |             |
| 132 | 551.2623  | 551.2629  | 4 | C <sub>89</sub> H <sub>148</sub> N <sub>28</sub> O <sub>33</sub> S <sub>2</sub>  | [443-447]                 |                                                                                  | X                       | <b>K443</b> |             |             |             |             |             |             |             |             |             |             |             |             |             |             |             |             |             |             |
| 133 | 555.7566  | 555.7656  | 4 | C <sub>89</sub> H <sub>150</sub> N <sub>28</sub> O <sub>34</sub> S <sub>2</sub>  | [443-447] <sup>6)</sup>   |                                                                                  | H                       |             |             | <b>K443</b> |             |             |             |             |             |             |             |             |             |             |             |             |             |             |             |             |
| 134 | 444.8053  | 444.8140  | 5 |                                                                                  |                           |                                                                                  |                         |             |             |             |             |             |             |             |             | H           | <b>K443</b> |             |             |             |             |             |             |             |             |             |
| 135 | 555.2615  | 555.2617  | 4 | C <sub>89</sub> H <sub>148</sub> N <sub>28</sub> O <sub>34</sub> S <sub>2</sub>  | [443-447] <sup>9)</sup>   |                                                                                  | X                       |             |             |             | <b>K443</b> |             |             |             |             |             |             |             |             |             |             |             |             |             |             |             |
| 136 | 961.2509  | 961.2588  | 5 | C <sub>204</sub> H <sub>317</sub> N <sub>63</sub> O <sub>66</sub> S <sub>3</sub> | [444-476] <sup>5,8)</sup> | X                                                                                | X                       |             |             |             |             |             |             |             |             |             |             |             |             |             |             |             |             |             |             |             |
| 137 | 801.2091  | 801.2170  | 6 |                                                                                  |                           |                                                                                  |                         |             |             |             |             | X           |             |             |             | X           |             |             |             |             |             |             |             |             |             |             |



|     |           |           |   |                                                                                  |                           |   |   |      |   |
|-----|-----------|-----------|---|----------------------------------------------------------------------------------|---------------------------|---|---|------|---|
| 138 | 1075.3039 | 1075.3118 | 5 | C <sub>228</sub> H <sub>355</sub> N <sub>69</sub> O <sub>76</sub> S <sub>3</sub> | [444-476] <sup>8)</sup>   |   | X | K452 |   |
| 139 | 896.2532  | 896.2611  | 6 |                                                                                  |                           |   |   |      | X |
| 140 | 768.3610  | 768.3678  | 7 |                                                                                  |                           |   | X |      | X |
| 141 | 898.9203  | 898.9269  | 6 | C <sub>228</sub> H <sub>355</sub> N <sub>69</sub> O <sub>77</sub> S <sub>3</sub> | [444-476] <sup>8,9)</sup> | X | X |      |   |
| 142 | 770.6460  | 770.6528  | 7 |                                                                                  |                           | X | X |      |   |
| 143 | 674.4393  | 674.4471  | 8 |                                                                                  |                           |   | X |      |   |
| 144 | 873.4177  | 873.4171  | 4 | C <sub>151</sub> H <sub>228</sub> N <sub>44</sub> O <sub>50</sub> S <sub>1</sub> | [448-469] <sup>5)</sup>   | X | X |      |   |
| 145 | 1015.9854 | 1015.9833 | 4 | C <sub>175</sub> H <sub>266</sub> N <sub>50</sub> O <sub>60</sub> S <sub>1</sub> | [448-469]                 | X | X |      |   |
| 146 | 812.9876  | 812.9882  | 5 |                                                                                  |                           | X | X |      |   |
| 147 | 899.2565  | 899.2629  | 6 | C <sub>228</sub> H <sub>357</sub> N <sub>69</sub> O <sub>77</sub> S <sub>3</sub> | [444-476] <sup>6,8)</sup> |   | H |      |   |
| 148 | 674.6924  | 674.6991  | 8 |                                                                                  |                           |   | H |      |   |
| 149 | 877.9097  | 877.9197  | 4 | C <sub>151</sub> H <sub>230</sub> N <sub>44</sub> O <sub>51</sub> S <sub>1</sub> | [448-469] <sup>5,6)</sup> |   | H |      |   |
| 150 | 702.5277  | 702.5374  | 5 |                                                                                  |                           |   | H |      |   |
| 151 | 816.5836  | 816.5903  | 5 | C <sub>175</sub> H <sub>268</sub> N <sub>50</sub> O <sub>61</sub> S <sub>1</sub> | [448-469] <sup>6)</sup>   |   | H |      |   |
| 152 | 704.6609  | 704.6624  | 3 | C <sub>84</sub> H <sub>138</sub> N <sub>30</sub> O <sub>30</sub> S <sub>2</sub>  | [470-478] <sup>5,8)</sup> | X | X | K476 |   |
| 153 | 528.7483  | 528.7487  | 4 |                                                                                  |                           | X | X |      |   |
| 154 | 671.3071  | 671.3150  | 4 | C <sub>108</sub> H <sub>176</sub> N <sub>36</sub> O <sub>40</sub> S <sub>2</sub> | [470-478] <sup>8)</sup>   | X | X |      |   |
| 155 | 537.2457  | 537.2535  | 5 |                                                                                  |                           | X | X |      |   |
| 156 | 766.8545  | 766.8624  | 6 | C <sub>203</sub> H <sub>299</sub> N <sub>55</sub> O <sub>64</sub> S <sub>2</sub> | [615-639]                 |   | X | K615 |   |
| 157 | 659.7317  | 659.7396  | 7 | C <sub>203</sub> H <sub>299</sub> N <sub>55</sub> O <sub>65</sub> S <sub>2</sub> | [615-639] <sup>9)</sup>   |   | X |      |   |
| 158 | 542.7535  | 542.7632  | 4 | C <sub>90</sub> H <sub>146</sub> N <sub>26</sub> O <sub>34</sub> S               | [652-656] <sup>6)</sup>   |   | H | K653 |   |
| 159 | 906.0205  | 906.0284  | 5 | C <sub>191</sub> H <sub>297</sub> N <sub>57</sub> O <sub>67</sub> S <sub>2</sub> | [657-682] <sup>8)</sup>   |   | X | K669 |   |
| 160 | 755.1837  | 755.1916  | 6 |                                                                                  |                           |   | X |      |   |
| 161 | 948.6313  | 948.6281  | 5 | C <sub>200</sub> H <sub>304</sub> N <sub>56</sub> O <sub>72</sub> S <sub>3</sub> | [703-728]                 | X | X | K722 |   |
| 162 | 790.6922  | 790.6913  | 6 |                                                                                  |                           | X | X |      |   |
| 163 | 780.0687  | 780.0674  | 3 | C <sub>103</sub> H <sub>164</sub> N <sub>28</sub> O <sub>32</sub> S <sub>1</sub> | [756-768] <sup>5)</sup>   | X | X | K757 |   |
| 164 | 727.8685  | 727.8687  | 4 | C <sub>127</sub> H <sub>202</sub> N <sub>34</sub> O <sub>42</sub> S <sub>1</sub> | [756-768]                 | X | X |      |   |
| 165 | 812.3994  | 812.4073  | 3 | C <sub>104</sub> H <sub>171</sub> N <sub>29</sub> O <sub>34</sub> S <sub>2</sub> | [758-771] <sup>5)</sup>   |   | X | K768 |   |
| 166 | 1002.4937 | 1002.4956 | 3 | C <sub>128</sub> H <sub>209</sub> N <sub>35</sub> O <sub>44</sub> S <sub>2</sub> | [758-771]                 | X | X |      |   |
| 167 | 752.1241  | 752.1237  | 4 |                                                                                  |                           | X | X |      |   |
| 168 | 756.1213  | 756.1224  | 4 | C <sub>128</sub> H <sub>209</sub> N <sub>35</sub> O <sub>45</sub> S <sub>2</sub> | [758-771] <sup>9)</sup>   | X | X |      |   |
| 169 | 605.4955  | 605.5026  | 5 | C <sub>128</sub> H <sub>211</sub> N <sub>35</sub> O <sub>45</sub> S <sub>2</sub> | [758-771] <sup>6)</sup>   |   | H |      |   |
| 170 | 630.7776  | 630.7836  | 4 | C <sub>108</sub> H <sub>162</sub> N <sub>30</sub> O <sub>34</sub> S <sub>3</sub> | [769-779] <sup>5,9)</sup> | X |   | K771 |   |
| 171 | 612.4893  | 612.4835  | 5 | C <sub>132</sub> H <sub>200</sub> N <sub>36</sub> O <sub>42</sub> S <sub>3</sub> | [769-779]                 |   | X |      |   |
| 172 | 773.3420  | 773.3499  | 4 | C <sub>132</sub> H <sub>200</sub> N <sub>36</sub> O <sub>44</sub> S <sub>3</sub> | [769-779] <sup>9)</sup>   |   | X |      |   |
| 173 | 618.8736  | 618.8815  | 5 |                                                                                  |                           |   | X |      |   |
| 174 | 525.98605 | 525.9939  | 4 | C <sub>86</sub> H <sub>133</sub> N <sub>29</sub> O <sub>31</sub> S               | [826-835] <sup>5)</sup>   |   | X | K829 |   |
| 175 | 939.9375  | 939.9352  | 4 | C <sub>163</sub> H <sub>242</sub> N <sub>46</sub> O <sub>53</sub> S <sub>2</sub> | [864-888] <sup>5,8)</sup> | X | X | K879 |   |
| 176 | 1082.4936 | 1082.5015 | 4 | C <sub>187</sub> H <sub>280</sub> N <sub>52</sub> O <sub>63</sub> S <sub>2</sub> | [864-888] <sup>8)</sup>   |   | X |      |   |
| 177 | 866.2018  | 866.2028  | 5 |                                                                                  |                           | X |   |      |   |
| 178 | 743.6663  | 743.6742  | 3 | C <sub>94</sub> H <sub>145</sub> N <sub>27</sub> O <sub>32</sub> S <sub>2</sub>  | [880-889] <sup>5,8)</sup> | X | X | K888 |   |
| 179 | 700.5660  | 700.5738  | 4 | C <sub>118</sub> H <sub>183</sub> N <sub>33</sub> O <sub>42</sub> S <sub>2</sub> | [880-889] <sup>8)</sup>   | X | X |      |   |
| 180 | 940.10267 | 940.1105  | 3 | C <sub>127</sub> H <sub>180</sub> N <sub>36</sub> O <sub>36</sub> S <sub>1</sub> | [917-931] <sup>5)</sup>   |   | X | K917 |   |
| 181 | 705.3340  | 705.3348  | 4 |                                                                                  |                           | X | X |      |   |
| 182 | 847.9018  | 847.9011  | 4 | C <sub>151</sub> H <sub>218</sub> N <sub>42</sub> O <sub>46</sub> S <sub>1</sub> | [917-931]                 | X | X |      |   |
| 183 | 678.5237  | 678.5225  | 5 |                                                                                  |                           | X | X |      |   |
| 184 | 568.0633  | 568.0716  | 5 | C <sub>127</sub> H <sub>182</sub> N <sub>36</sub> O <sub>37</sub> S <sub>1</sub> | [917-931] <sup>5,6)</sup> |   | H |      |   |

|     |           |           |   |                                                                                  |                              |                                                                                  |                             |              |
|-----|-----------|-----------|---|----------------------------------------------------------------------------------|------------------------------|----------------------------------------------------------------------------------|-----------------------------|--------------|
| 185 | 852.3962  | 852.4037  | 4 | C <sub>151</sub> H <sub>220</sub> N <sub>42</sub> O <sub>47</sub> S <sub>1</sub> | [917-931] <sup>6)</sup>      |                                                                                  | H                           |              |
| 186 | 682.1170  | 682.1246  | 5 |                                                                                  |                              |                                                                                  | H                           |              |
| 187 | 568.5975  | 568.6051  | 6 |                                                                                  |                              |                                                                                  | H                           |              |
| 188 | 633.1155  | 633.1231  | 5 | C <sub>141</sub> H <sub>217</sub> N <sub>39</sub> O <sub>42</sub> S              | [1051-1062] <sup>6)</sup>    |                                                                                  | H                           | <b>K1060</b> |
| 189 | 806.1214  | 806.1253  | 4 | C <sub>132</sub> H <sub>213</sub> N <sub>41</sub> O <sub>47</sub> S <sub>3</sub> | [1063-1077] <sup>8)</sup>    | X                                                                                | X                           | <b>K1064</b> |
| 190 | 810.6210  | 810.6279  | 4 | C <sub>132</sub> H <sub>215</sub> N <sub>41</sub> O <sub>48</sub> S <sub>3</sub> | [1063-1077] <sup>6)</sup>    |                                                                                  | H                           |              |
| 191 | 648.6968  | 648.7039  | 5 |                                                                                  |                              |                                                                                  | H                           |              |
| 192 | 871.2720  | 871.2799  | 7 | C <sub>266</sub> H <sub>407</sub> N <sub>75</sub> O <sub>84</sub> S <sub>3</sub> | [1065-1108] <sup>5,8)</sup>  |                                                                                  | X                           | <b>K1078</b> |
| 193 | 1111.3615 | 1111.3694 | 6 | C <sub>290</sub> H <sub>445</sub> N <sub>81</sub> O <sub>94</sub> S <sub>3</sub> | [1065-1108] <sup>8)</sup>    |                                                                                  | X                           |              |
| 194 | 952.7395  | 952.7463  | 7 |                                                                                  |                              | X                                                                                | X                           |              |
| 195 | 1046.8442 | 1046.8441 | 3 |                                                                                  |                              | C <sub>134</sub> H <sub>212</sub> N <sub>38</sub> O <sub>47</sub> S <sub>1</sub> | [1078-1096] <sup>5)</sup>   |              |
| 196 | 1236.9245 | 1236.9324 | 3 | C <sub>158</sub> H <sub>250</sub> N <sub>44</sub> O <sub>57</sub> S <sub>1</sub> | [1078-1096]                  |                                                                                  | X                           |              |
| 197 | 927.9522  | 927.9512  | 4 |                                                                                  |                              | X                                                                                | X                           |              |
| 198 | 742.5630  | 742.5626  | 5 |                                                                                  |                              | X                                                                                |                             |              |
| 199 | 798.9866  | 798.9944  | 5 | C <sub>173</sub> H <sub>268</sub> N <sub>50</sub> O <sub>57</sub> S              | [1078-1103] <sup>5)</sup>    | X                                                                                | X                           |              |
| 200 | 913.0473  | 913.0474  | 5 | C <sub>197</sub> H <sub>306</sub> N <sub>56</sub> O <sub>67</sub> S <sub>1</sub> | [1078-1103]                  | X                                                                                | X                           |              |
| 201 | 761.0397  | 761.0408  | 6 |                                                                                  |                              | X                                                                                | X                           |              |
| 202 | 789.8799  | 789.8876  | 4 | C <sub>134</sub> H <sub>214</sub> N <sub>38</sub> O <sub>48</sub> S <sub>1</sub> | [1078-1096] <sup>5,6)</sup>  |                                                                                  | H                           |              |
| 203 | 932.4474  | 932.4539  | 4 | C <sub>158</sub> H <sub>252</sub> N <sub>44</sub> O <sub>58</sub> S <sub>1</sub> | [1078-1096] <sup>6)</sup>    |                                                                                  | H                           |              |
| 204 | 746.1579  | 746.1647  | 5 |                                                                                  |                              |                                                                                  | H                           |              |
| 205 | 668.9888  | 668.9884  | 6 | C <sub>173</sub> H <sub>270</sub> N <sub>50</sub> O <sub>58</sub> S              | [1078-1103] <sup>5,6)</sup>  |                                                                                  | H                           |              |
| 206 | 655.0302  | 655.0376  | 7 | C <sub>197</sub> H <sub>308</sub> N <sub>56</sub> O <sub>68</sub> S <sub>1</sub> | [1078-1103] <sup>6)</sup>    |                                                                                  | H                           |              |
| 207 | 1600.4044 | 1600.4122 | 3 | C <sub>212</sub> H <sub>312</sub> N <sub>54</sub> O <sub>72</sub> S              | [1104-1130]                  |                                                                                  | X                           | <b>K1108</b> |
| 208 | 960.6426  | 960.6505  | 5 |                                                                                  |                              |                                                                                  | X                           |              |
| 209 | 1062.4886 | 1062.4976 | 4 |                                                                                  |                              | C <sub>188</sub> H <sub>276</sub> N <sub>48</sub> O <sub>63</sub> S              | [1104-1130] <sup>5,6)</sup> |              |
| 210 | 918.65258 | 918.6605  | 5 | C <sub>204</sub> H <sub>314</sub> N <sub>56</sub> O <sub>61</sub> S <sub>2</sub> | [1137-1162] <sup>8)</sup>    |                                                                                  | X                           | <b>K1157</b> |
| 211 | 837.4176  | 837.4231  | 3 | C <sub>110</sub> H <sub>176</sub> N <sub>30</sub> O <sub>33</sub> S <sub>2</sub> | [1150-1162] <sup>5,8)</sup>  | X                                                                                | X                           |              |
| 212 | 955.7945  | 955.8024  | 3 | C <sub>125</sub> H <sub>197</sub> N <sub>33</sub> O <sub>40</sub> S <sub>2</sub> | [1150-1162] <sup>8,10)</sup> | X                                                                                | X                           |              |
| 213 | 770.8816  | 770.8855  | 4 | C <sub>134</sub> H <sub>214</sub> N <sub>36</sub> O <sub>43</sub> S <sub>2</sub> | [1150-1162] <sup>8)</sup>    | X                                                                                | X                           |              |
| 214 | 616.9021  | 616.9100  | 5 |                                                                                  |                              |                                                                                  | X                           |              |
| 215 | 922.2545  | 922.2626  | 5 | C <sub>204</sub> H <sub>316</sub> N <sub>56</sub> O <sub>62</sub> S <sub>2</sub> | [1137-1162] <sup>6,8)</sup>  |                                                                                  | H                           |              |
| 216 | 768.7121  | 768.7201  | 6 |                                                                                  |                              |                                                                                  | H                           |              |
| 217 | 757.0129  | 757.0201  | 3 | C <sub>98</sub> H <sub>149</sub> N <sub>25</sub> O <sub>35</sub> S               | [1191-1195]                  |                                                                                  | X                           | <b>K1193</b> |
| 218 | 63.1072   | 763.1150  | 4 | C <sub>135</sub> H <sub>201</sub> N <sub>35</sub> O <sub>44</sub> S              | [1205-1216]                  | X                                                                                | X                           | <b>K1214</b> |
| 219 | 979.4557  | 979.4598  | 2 | C <sub>88</sub> H <sub>128</sub> N <sub>22</sub> O <sub>27</sub> S               | [1210-1216] <sup>5)</sup>    | X                                                                                | X                           |              |
| 220 | 653.3034  | 653.3091  | 3 |                                                                                  |                              | X                                                                                | X                           |              |
| 221 | 843.3900  | 843.3975  | 3 | C <sub>112</sub> H <sub>166</sub> N <sub>28</sub> O <sub>37</sub> S              | [1210-1216]                  | X                                                                                | X                           |              |
| 222 | 913.0583  | 913.0662  | 5 | C <sub>196</sub> H <sub>318</sub> N <sub>56</sub> O <sub>67</sub> S              | [1262-1292] <sup>5)</sup>    |                                                                                  | X                           | <b>K1283</b> |
| 223 | 1283.6479 | 1283.6470 | 4 | C <sub>220</sub> H <sub>356</sub> N <sub>62</sub> O <sub>77</sub> S <sub>1</sub> | [1262-1292]                  |                                                                                  | X                           |              |
| 224 | 1027.1216 | 1027.1191 | 5 |                                                                                  |                              | X                                                                                | X                           |              |
| 225 | 856.1015  | 856.1006  | 6 |                                                                                  |                              | X                                                                                | X                           |              |
| 226 | 1031.0041 | 1031.0077 | 2 | C <sub>88</sub> H <sub>141</sub> N <sub>25</sub> O <sub>30</sub> S               | [1276-1284] <sup>5)</sup>    | X                                                                                | X                           |              |
| 227 | 687.6691  | 687.6744  | 3 |                                                                                  |                              | X                                                                                | X                           |              |
| 228 | 877.7574  | 877.7627  | 3 | C <sub>112</sub> H <sub>179</sub> N <sub>31</sub> O <sub>40</sub> S              | [1276-1284]                  | X                                                                                | X                           |              |
| 229 | 658.5661  | 658.574   | 4 |                                                                                  |                              |                                                                                  | X                           |              |
| 230 | 983.8323  | 983.8312  | 3 | C <sub>129</sub> H <sub>205</sub> N <sub>35</sub> O <sub>42</sub> S <sub>1</sub> | [1276-1292] <sup>5)</sup>    | X                                                                                | X                           |              |
| 231 | 1173.9116 | 1173.9196 | 3 | C <sub>153</sub> H <sub>243</sub> N <sub>41</sub> O <sub>52</sub> S <sub>1</sub> | [1276-1292]                  |                                                                                  | X                           |              |

|     |           |           |   |                                                                                  |                             |                                                                    |                           |       |       |   |
|-----|-----------|-----------|---|----------------------------------------------------------------------------------|-----------------------------|--------------------------------------------------------------------|---------------------------|-------|-------|---|
| 232 | 880.6933  | 880.6916  | 4 |                                                                                  |                             | X                                                                  | X                         |       |       |   |
| 233 | 916.6610  | 916.6683  | 5 | C <sub>196</sub> H <sub>320</sub> N <sub>56</sub> O <sub>68</sub> S              | [1276-1292] <sup>6,5)</sup> |                                                                    | H                         |       |       |   |
| 234 | 764.0508  | 764.0582  | 6 |                                                                                  |                             |                                                                    |                           | H     |       |   |
| 235 | 885.1874  | 885.1943  | 4 | C <sub>153</sub> H <sub>245</sub> N <sub>41</sub> O <sub>53</sub> S <sub>1</sub> | [1276-1292] <sup>6)</sup>   |                                                                    | H                         |       |       |   |
| 236 | 835.0730  | 835.0732  | 3 | C <sub>109</sub> H <sub>167</sub> N <sub>31</sub> O <sub>35</sub> S <sub>1</sub> | [1284-1296] <sup>5)</sup>   | X                                                                  | X                         | K1292 |       |   |
| 237 | 626.5574  | 626.5569  | 4 |                                                                                  |                             |                                                                    | X                         |       | X     |   |
| 238 | 1025.1645 | 1025.1615 | 3 | C <sub>133</sub> H <sub>205</sub> N <sub>37</sub> O <sub>45</sub> S <sub>1</sub> | [1284-1296]                 | X                                                                  | X                         |       |       |   |
| 239 | 769.1233  | 769.1231  | 4 |                                                                                  |                             |                                                                    | X                         |       | X     |   |
| 240 | 615.5006  | 615.5006  | 5 |                                                                                  |                             |                                                                    | X                         |       | X     |   |
| 241 | 637.9826  | 637.9885  | 3 |                                                                                  |                             | C <sub>82</sub> H <sub>130</sub> N <sub>26</sub> O <sub>25</sub> S | [1289-1296] <sup>5)</sup> |       | X     | X |
| 242 | 478.7372  | 478.7433  | 4 |                                                                                  | X                           |                                                                    |                           |       | X     |   |
| 243 | 621.3017  | 621.3096  | 4 | C <sub>106</sub> H <sub>168</sub> N <sub>32</sub> O <sub>35</sub> S              | [1289-1296]                 |                                                                    | X                         |       |       |   |
| 244 | 773.6181  | 773.6257  | 4 | C <sub>133</sub> H <sub>207</sub> N <sub>37</sub> O <sub>46</sub> S <sub>1</sub> | [1284-1296] <sup>6)</sup>   |                                                                    | H                         |       |       |   |
| 245 | 619.0945  | 619.1022  | 5 |                                                                                  |                             |                                                                    |                           |       | H     |   |
| 246 | 516.0788  | 516.0864  | 6 |                                                                                  |                             |                                                                    |                           |       | H     |   |
| 247 | 681.3048  | 681.3127  | 3 | C <sub>86</sub> H <sub>132</sub> N <sub>26</sub> O <sub>28</sub> S <sub>2</sub>  | [1293-1301] <sup>5,8)</sup> |                                                                    | X                         |       | K1296 |   |
| 248 | 653.7967  | 653.8027  | 4 | C <sub>110</sub> H <sub>170</sub> N <sub>32</sub> O <sub>38</sub> S <sub>2</sub> | [1293-1301] <sup>8)</sup>   | X                                                                  |                           |       |       |   |
| 249 | 1261.0921 | 1261.0956 | 4 | C <sub>222</sub> H <sub>330</sub> N <sub>58</sub> O <sub>75</sub> S <sub>1</sub> | [1336-1366]                 | X                                                                  | X                         | 1349  |       |   |
| 250 | 1009.0786 | 1009.0781 | 5 |                                                                                  |                             |                                                                    | X                         |       | X     |   |
| 251 | 914.1036  | 914.1085  | 3 | C <sub>114</sub> H <sub>186</sub> N <sub>32</sub> O <sub>44</sub> S              | [1349-1359]                 | X                                                                  | X                         |       |       |   |
| 252 | 1003.8099 | 1003.8177 | 3 | C <sub>128</sub> H <sub>201</sub> N <sub>37</sub> O <sub>45</sub> S              | [1349-1366] <sup>5)</sup>   |                                                                    | X                         |       |       |   |
| 253 | 895.6736  | 895.6815  | 4 | C <sub>152</sub> H <sub>239</sub> N <sub>43</sub> O <sub>55</sub> S              | [1349-1366]                 |                                                                    | X                         |       |       |   |
| 254 | 1123.0256 | 1123.0320 | 4 | C <sub>198</sub> H <sub>294</sub> N <sub>52</sub> O <sub>66</sub> S              | [1336-1366] <sup>5,6)</sup> |                                                                    | H                         |       |       |   |
| 255 | 933.0779  | 933.0858  | 3 | C <sub>122</sub> H <sub>177</sub> N <sub>31</sub> O <sub>43</sub> S              | [1395-1403]                 |                                                                    | X                         | K1399 |       |   |
| 256 | 1003.4851 | 1003.4843 | 4 | C <sub>180</sub> H <sub>264</sub> N <sub>48</sub> O <sub>55</sub> S <sub>1</sub> | [1436-1461] <sup>5)</sup>   | X                                                                  | X                         | K1437 |       |   |
| 257 | 917.0454  | 917.0419  | 5 | C <sub>204</sub> H <sub>302</sub> N <sub>54</sub> O <sub>65</sub> S <sub>1</sub> | [1436-1461]                 | X                                                                  | X                         |       |       |   |
| 258 | 655.3101  | 655.3179  | 7 |                                                                                  |                             |                                                                    |                           |       |       | X |
| 259 | 806.5812  | 806.5911  | 5 | C <sub>180</sub> H <sub>266</sub> N <sub>48</sub> O <sub>56</sub> S <sub>1</sub> | [1436-1461] <sup>5,6)</sup> |                                                                    | H                         |       |       |   |
| 260 | 672.3176  | 672.3272  | 6 |                                                                                  |                             |                                                                    |                           |       |       | H |
| 261 | 767.3617  | 767.3713  | 6 | C <sub>204</sub> H <sub>304</sub> N <sub>54</sub> O <sub>66</sub> S <sub>1</sub> | [1436-1461] <sup>6)</sup>   |                                                                    | H                         |       |       |   |
| 262 | 657.8815  | 657.8909  | 7 |                                                                                  |                             |                                                                    |                           |       |       | H |
| 263 | 739.9977  | 740.0081  | 3 | C <sub>93</sub> H <sub>144</sub> N <sub>26</sub> O <sub>35</sub> S               | [1475-1479]                 |                                                                    | X                         | K1475 |       |   |
| 264 | 706.3223  | 706.3224  | 4 | C <sub>115</sub> H <sub>184</sub> N <sub>36</sub> O <sub>41</sub> S <sub>3</sub> | [1475-1489] <sup>5,8)</sup> | X                                                                  | X                         |       |       |   |
| 265 | 848.8807  | 848.8886  | 4 | C <sub>139</sub> H <sub>222</sub> N <sub>42</sub> O <sub>51</sub> S <sub>3</sub> | [1475-1489] <sup>8)</sup>   |                                                                    | X                         |       |       |   |
| 266 | 679.3126  | 679.3124  | 5 |                                                                                  |                             |                                                                    | X                         |       | X     |   |
| 267 | 682.5050  | 682.5114  | 5 | C <sub>139</sub> H <sub>222</sub> N <sub>42</sub> O <sub>52</sub> S <sub>3</sub> | [1475-1489] <sup>8,9)</sup> | X                                                                  | X                         |       |       |   |
| 268 | 906.5835  | 906.5913  | 6 | C <sub>228</sub> H <sub>361</sub> N <sub>65</sub> O <sub>81</sub> S <sub>4</sub> | [1475-1507] <sup>8,9)</sup> |                                                                    | X                         |       |       |   |
| 269 | 682.9053  | 682.9146  | 5 | C <sub>139</sub> H <sub>224</sub> N <sub>42</sub> O <sub>52</sub> S <sub>3</sub> | [1475-1489] <sup>8,6)</sup> |                                                                    | H                         |       |       |   |
| 270 | 970.4482  | 970.4561  | 5 | C <sub>204</sub> H <sub>323</sub> N <sub>59</sub> O <sub>70</sub> S <sub>4</sub> | [1475-1507] <sup>5,8)</sup> | X                                                                  | X                         | K1489 |       |   |
| 271 | 1084.5012 | 1084.5090 | 5 | C <sub>228</sub> H <sub>361</sub> N <sub>65</sub> O <sub>80</sub> S <sub>4</sub> | [1475-1507] <sup>8)</sup>   | X                                                                  | X                         |       |       |   |
| 272 | 903.92113 | 903.9255  | 6 |                                                                                  |                             |                                                                    | X                         |       | X     |   |
| 273 | 1087.7001 | 1087.7080 | 5 | C <sub>228</sub> H <sub>361</sub> N <sub>65</sub> O <sub>81</sub> S <sub>4</sub> | [1475-1507] <sup>8,9)</sup> |                                                                    | X                         |       |       |   |
| 274 | 906.5835  | 906.5913  | 6 |                                                                                  |                             |                                                                    |                           |       |       | X |
| 275 | 1180.7865 | 1180.7944 | 4 | C <sub>198</sub> H <sub>311</sub> N <sub>57</sub> O <sub>69</sub> S <sub>4</sub> | [1476-1507] <sup>5,8)</sup> | X                                                                  | X                         |       |       |   |
| 276 | 1058.8836 | 1058.8900 | 5 | C <sub>222</sub> H <sub>349</sub> N <sub>63</sub> O <sub>79</sub> S <sub>4</sub> | [1476-1507] <sup>8)</sup>   | X                                                                  | X                         |       |       |   |
| 277 | 1062.0812 | 1062.0890 | 5 | C <sub>222</sub> H <sub>349</sub> N <sub>63</sub> O <sub>80</sub> S <sub>4</sub> | [1476-1507] <sup>8,9)</sup> |                                                                    | X                         |       |       |   |
| 278 | 917.7656  | 917.7735  | 3 | C <sub>118</sub> H <sub>183</sub> N <sub>33</sub> O <sub>41</sub> S              | [1489-1498]                 | X                                                                  | X                         |       |       |   |

|     |           |           |   |                                                                                   |                             |                                                                                   |                           |       |
|-----|-----------|-----------|---|-----------------------------------------------------------------------------------|-----------------------------|-----------------------------------------------------------------------------------|---------------------------|-------|
| 279 | 1057.5153 | 1057.5135 | 3 | C <sub>135</sub> H <sub>216</sub> N <sub>38</sub> O <sub>46</sub> S <sub>2</sub>  | [1489-1507] <sup>5)</sup>   |                                                                                   | X                         |       |
| 280 | 1062.8396 | 1062.8452 | 3 | C <sub>135</sub> H <sub>216</sub> N <sub>38</sub> O <sub>47</sub> S <sub>2</sub>  | [1489-1507] <sup>5,9)</sup> | X                                                                                 |                           |       |
| 281 | 935.9540  | 935.9534  | 4 | C <sub>159</sub> H <sub>254</sub> N <sub>44</sub> O <sub>56</sub> S <sub>2</sub>  | [1489-1507]                 | X                                                                                 | X                         |       |
| 282 | 939.94423 | 939.9521  | 4 | C <sub>159</sub> H <sub>254</sub> N <sub>44</sub> O <sub>57</sub> S <sub>2</sub>  | [1489-1507] <sup>9)</sup>   |                                                                                   | X                         |       |
| 283 | 906.9176  | 906.9272  | 6 | C <sub>228</sub> H <sub>363</sub> N <sub>65</sub> O <sub>81</sub> S <sub>4</sub>  | [1475-1507] <sup>6,8)</sup> |                                                                                   | H                         |       |
| 284 | 932.2279  | 932.2358  | 5 | C <sub>199</sub> H <sub>302</sub> N <sub>58</sub> O <sub>68</sub> S <sub>2</sub>  | [1490-1520] <sup>5)</sup>   |                                                                                   | X                         |       |
| 285 | 1046.2809 | 1046.2888 | 5 | C <sub>223</sub> H <sub>340</sub> N <sub>64</sub> O <sub>78</sub> S <sub>2</sub>  | [1490-1520]                 | X                                                                                 | X                         |       |
| 286 | 1243.5800 | 1243.5879 | 6 | C <sub>328</sub> H <sub>484</sub> N <sub>92</sub> O <sub>105</sub> S <sub>2</sub> | [1490-1537]                 |                                                                                   | X                         |       |
| 287 | 1066.0686 | 1066.0764 | 7 |                                                                                   |                             | X                                                                                 | X                         |       |
| 288 | 932.9350  | 932.9429  | 8 |                                                                                   |                             |                                                                                   | X                         |       |
| 289 | 1068.3535 | 1068.3615 | 7 |                                                                                   |                             | C <sub>328</sub> H <sub>484</sub> N <sub>92</sub> O <sub>106</sub> S <sub>2</sub> | [1490-1537] <sup>9)</sup> |       |
| 290 | 934.9344  | 934.9422  | 8 |                                                                                   | X                           |                                                                                   |                           |       |
| 291 | 875.0674  | 875.0770  | 6 | C <sub>223</sub> H <sub>342</sub> N <sub>64</sub> O <sub>79</sub> S <sub>2</sub>  | [1490-1520] <sup>6)</sup>   |                                                                                   | H                         |       |
| 292 | 845.6893  | 845.6972  | 7 | C <sub>260</sub> H <sub>386</sub> N <sub>78</sub> O <sub>80</sub> S               | [1508-1546] <sup>5)</sup>   |                                                                                   | X                         |       |
| 293 | 967.71083 | 967.7187  | 4 | C <sub>169</sub> H <sub>255</sub> N <sub>49</sub> O <sub>54</sub> S               | [1523-1545] <sup>5)</sup>   |                                                                                   | X                         |       |
| 294 | 1110.2846 | 1110.2849 | 4 | C <sub>193</sub> H <sub>293</sub> N <sub>55</sub> O <sub>64</sub> S <sub>1</sub>  | [1523-1545]                 | X                                                                                 | X                         |       |
| 295 | 888.4303  | 888.4295  | 5 |                                                                                   |                             | X                                                                                 | X                         |       |
| 296 | 892.0252  | 892.0316  | 5 | C <sub>193</sub> H <sub>295</sub> N <sub>55</sub> O <sub>65</sub> S <sub>1</sub>  | [1523-1545] <sup>6)</sup>   |                                                                                   | H                         |       |
| 297 | 743.5210  | 743.5276  | 6 |                                                                                   |                             |                                                                                   | H                         |       |
| 298 | 716.3195  | 716.3256  | 3 | C <sub>84</sub> H <sub>139</sub> N <sub>29</sub> O <sub>33</sub> S <sub>2</sub>   | [1574-1583] <sup>5,8)</sup> | X                                                                                 | X                         |       |
| 299 | 680.0560  | 680.0624  | 4 | C <sub>108</sub> H <sub>177</sub> N <sub>35</sub> O <sub>43</sub> S <sub>2</sub>  | [1574-1583] <sup>8)</sup>   | X                                                                                 |                           | K1581 |
| 300 | 863.4113  | 863.4192  | 5 | C <sub>190</sub> H <sub>290</sub> N <sub>50</sub> O <sub>61</sub> S <sub>2</sub>  | [1582-1605]                 |                                                                                   | X                         |       |
| 301 | 719.6773  | 719.6840  | 6 |                                                                                   |                             |                                                                                   | X                         |       |
| 302 | 866.6103  | 866.6182  | 5 | C <sub>190</sub> H <sub>290</sub> N <sub>50</sub> O <sub>62</sub> S <sub>2</sub>  | [1582-1605] <sup>9)</sup>   |                                                                                   | X                         |       |
| 303 | 722.3497  | 722.3498  | 6 |                                                                                   |                             | X                                                                                 | X                         |       |
| 304 | 850.2521  | 850.2492  | 6 | C <sub>227</sub> H <sub>343</sub> N <sub>59</sub> O <sub>71</sub> S <sub>2</sub>  | [1584-1614]                 | X                                                                                 | X                         |       |
| 305 | 728.9212  | 728.9290  | 7 |                                                                                   |                             |                                                                                   | X                         |       |
| 306 | 609.0539  | 609.0618  | 4 | C <sub>108</sub> H <sub>169</sub> N <sub>29</sub> O <sub>33</sub> S               | [1603-1614] <sup>5)</sup>   |                                                                                   | X                         | K1605 |
| 307 | 601.4961  | 601.504   | 5 | C <sub>132</sub> H <sub>207</sub> N <sub>35</sub> O <sub>43</sub> S               | [1603-1614]                 |                                                                                   | X                         |       |
| 308 | 1126.5703 | 1126.5703 | 3 | C <sub>150</sub> H <sub>233</sub> N <sub>41</sub> O <sub>46</sub> S <sub>1</sub>  | [1606-1627] <sup>5)</sup>   | X                                                                                 | X                         |       |
| 309 | 845.1788  | 845.1797  | 4 |                                                                                   |                             | X                                                                                 | X                         |       |
| 310 | 676.3446  | 676.3453  | 5 |                                                                                   |                             | X                                                                                 | X                         |       |
| 311 | 1316.6591 | 1316.6586 | 3 |                                                                                   |                             | C <sub>174</sub> H <sub>271</sub> N <sub>47</sub> O <sub>56</sub> S <sub>1</sub>  | [1606-1627]               | X     |
| 312 | 987.7473  | 987.7459  | 4 | X                                                                                 | X                           |                                                                                   |                           |       |
| 313 | 790.3967  | 790.3983  | 5 |                                                                                   | X                           |                                                                                   |                           |       |
| 314 | 658.8326  | 658.8332  | 6 | X                                                                                 | X                           |                                                                                   |                           |       |
| 315 | 849.6740  | 849.6823  | 4 | C <sub>150</sub> H <sub>235</sub> N <sub>41</sub> O <sub>47</sub> S <sub>1</sub>  | [1606-1627] <sup>5,6)</sup> |                                                                                   | H                         |       |
| 316 | 679.9392  | 679.9474  | 5 | C <sub>174</sub> H <sub>273</sub> N <sub>47</sub> O <sub>57</sub> S <sub>1</sub>  | [1606-1627] <sup>6)</sup>   |                                                                                   | H                         |       |
| 317 | 793.9929  | 794.0004  | 5 |                                                                                   |                             |                                                                                   | H                         |       |
| 318 | 661.8275  | 661.8350  | 6 |                                                                                   |                             |                                                                                   | H                         |       |
| 319 | 701.3513  | 701.3516  | 4 |                                                                                   |                             | C <sub>117</sub> H <sub>196</sub> N <sub>32</sub> O <sub>45</sub> S <sub>1</sub>  | [1671-1681]               | X     |
| 320 | 886.44257 | 886.4504  | 3 | C <sub>114</sub> H <sub>185</sub> N <sub>33</sub> O <sub>38</sub> S               | [1672-1685] <sup>5)</sup>   |                                                                                   | X                         |       |
| 321 | 665.08193 | 665.0898  | 4 |                                                                                   |                             | X                                                                                 | X                         |       |
| 322 | 1076.5309 | 1076.5388 | 3 | C <sub>138</sub> H <sub>223</sub> N <sub>39</sub> O <sub>48</sub> S               | [1672-1685]                 |                                                                                   | X                         |       |
| 323 | 807.6510  | 807.6560  | 4 |                                                                                   |                             | X                                                                                 | X                         |       |
| 324 | 646.3195  | 646.3264  | 5 |                                                                                   |                             | X                                                                                 | X                         |       |
| 325 | 929.1409  | 929.1488  | 3 | C <sub>120</sub> H <sub>197</sub> N <sub>35</sub> O <sub>39</sub> S <sub>1</sub>  | [1672-1686] <sup>5)</sup>   |                                                                                   | X                         |       |

|     |           |           |   |                                                                                  |                               |   |   |              |
|-----|-----------|-----------|---|----------------------------------------------------------------------------------|-------------------------------|---|---|--------------|
| 326 | 697.1057  | 697.1135  | 4 |                                                                                  |                               |   | X |              |
| 327 | 557.8934  | 557.8924  | 5 |                                                                                  |                               | X | X |              |
| 328 | 839.6788  | 839.6797  | 4 |                                                                                  |                               | X | X |              |
| 329 | 671.9458  | 671.9454  | 5 | C <sub>144</sub> H <sub>235</sub> N <sub>41</sub> O <sub>49</sub> S <sub>1</sub> | [1672-1686]                   | X | X |              |
| 330 | 560.1146  | 560.1224  | 6 |                                                                                  |                               |   | X |              |
| 331 | 566.6155  | 566.6234  | 3 | C <sub>73</sub> H <sub>116</sub> N <sub>24</sub> O <sub>21</sub> S               | [1681-1685] <sup>5)</sup>     |   | X |              |
| 332 | 454.4223  | 454.4302  | 5 | C <sub>97</sub> H <sub>154</sub> N <sub>30</sub> O <sub>31</sub> S               | [1681-1685]                   |   | X |              |
| 333 | 669.5844  | 669.5925  | 4 | C <sub>114</sub> H <sub>187</sub> N <sub>33</sub> O <sub>39</sub> S              | [1672-1685] <sup>5,6)</sup>   |   | H |              |
| 334 | 535.8675  | 535.8755  | 5 |                                                                                  |                               |   | H |              |
| 335 | 812.1517  | 812.1587  | 4 | C <sub>138</sub> H <sub>225</sub> N <sub>39</sub> O <sub>49</sub> S              | [1672-1685] <sup>6)</sup>     |   | H |              |
| 336 | 561.4871  | 561.4945  | 5 | C <sub>120</sub> H <sub>199</sub> N <sub>35</sub> O <sub>40</sub> S <sub>1</sub> | [1672-1686] <sup>5,6)</sup>   |   | H |              |
| 337 | 675.5407  | 675.5475  | 5 | C <sub>144</sub> H <sub>237</sub> N <sub>41</sub> O <sub>50</sub> S <sub>1</sub> | [1672-1686] <sup>6)</sup>     |   | H |              |
| 338 | 563.1172  | 563.1242  | 6 |                                                                                  |                               |   | H |              |
| 339 | 832.7459  | 832.7450  | 3 | C <sub>108</sub> H <sub>170</sub> N <sub>30</sub> O <sub>36</sub> S <sub>1</sub> | [1738-1749] <sup>5)</sup>     | X | X |              |
| 340 | 1022.8323 | 1022.8333 | 3 |                                                                                  |                               | X |   |              |
| 341 | 767.3778  | 767.3770  | 4 | C <sub>132</sub> H <sub>208</sub> N <sub>36</sub> O <sub>46</sub> S <sub>1</sub> | [1738-1749]                   | X | X | <b>K1748</b> |
| 342 | 614.1044  | 614.1031  | 5 |                                                                                  |                               | X | X |              |
| 343 | 656.9231  | 656.9305  | 5 | C <sub>148</sub> H <sub>222</sub> N <sub>40</sub> O <sub>43</sub> S              | [1779-1792]                   | X | X |              |
| 344 | 1096.2967 | 1096.2948 | 4 |                                                                                  |                               |   | X |              |
| 345 | 877.2378  | 877.2374  | 5 | C <sub>198</sub> H <sub>297</sub> N <sub>51</sub> O <sub>60</sub> S <sub>1</sub> | [1764-1792] <sup>5)</sup>     | X | X |              |
| 346 | 1238.8531 | 1238.861  | 4 |                                                                                  |                               |   | X |              |
| 347 | 991.2921  | 991.2903  | 5 | C <sub>222</sub> H <sub>335</sub> N <sub>57</sub> O <sub>70</sub> S <sub>1</sub> | [1764-1792]                   | X | X | <b>K1784</b> |
| 348 | 826.243   | 826.2433  | 6 |                                                                                  |                               | X | X |              |
| 349 | 708.3467  | 708.3525  | 7 |                                                                                  |                               |   | X |              |
| 350 | 880.8295  | 880.8395  | 5 | C <sub>198</sub> H <sub>299</sub> N <sub>51</sub> O <sub>61</sub> S <sub>1</sub> | [1764-1792] <sup>5,6)</sup>   |   | H |              |
| 351 | 994.8839  | 994.8925  | 5 |                                                                                  |                               |   | H |              |
| 352 | 829.2366  | 829.2451  | 6 | C <sub>222</sub> H <sub>337</sub> N <sub>57</sub> O <sub>71</sub> S <sub>1</sub> | [1764-1792] <sup>6)</sup>     |   | H |              |
| 353 | 710.9171  | 710.9254  | 7 |                                                                                  |                               |   | H |              |
| 354 | 1016.7317 | 1016.7396 | 4 | C <sub>177</sub> H <sub>271</sub> N <sub>47</sub> O <sub>61</sub> S              | [1785-1806]                   |   | X |              |
| 355 | 924.6497  | 924.6493  | 5 | C <sub>204</sub> H <sub>308</sub> N <sub>54</sub> O <sub>67</sub> S <sub>1</sub> | [1785-1816] <sup>5)</sup>     |   | X |              |
| 356 | 1298.1180 | 1298.1260 | 4 |                                                                                  |                               |   | X |              |
| 357 | 1038.6979 | 1038.7023 | 5 | C <sub>228</sub> H <sub>346</sub> N <sub>60</sub> O <sub>77</sub> S <sub>1</sub> | [1785-1816]                   | X |   | <b>K1792</b> |
| 358 | 865.7516  | 865.7516  | 6 |                                                                                  |                               | X | X |              |
| 359 | 817.1853  | 817.1953  | 5 | C <sub>177</sub> H <sub>273</sub> N <sub>47</sub> O <sub>62</sub> S              | [1785-1806]                   |   | H |              |
| 360 | 868.7477  | 868.7550  | 6 | C <sub>228</sub> H <sub>348</sub> N <sub>60</sub> O <sub>78</sub> S <sub>1</sub> | [1785-1816]                   |   | H |              |
| 361 | 794.3679  | 794.3757  | 2 | C <sub>64</sub> H <sub>106</sub> N <sub>20</sub> O <sub>25</sub> S               | [1898-1903] <sup>5)</sup>     |   | X |              |
| 362 | 720.0002  | 720.0081  | 3 | C <sub>88</sub> H <sub>144</sub> N <sub>26</sub> O <sub>35</sub> S               | [1898-1903]                   |   | X |              |
| 363 | 886.0734  | 886.0813  | 3 |                                                                                  |                               |   | X |              |
| 364 | 664.8123  | 664.8129  | 4 | C <sub>108</sub> H <sub>178</sub> N <sub>34</sub> O <sub>38</sub> S <sub>3</sub> | [1898-1912] <sup>5,8)</sup>   | X | X | <b>K1902</b> |
| 365 | 668.8051  | 668.8116  | 4 | C <sub>108</sub> H <sub>178</sub> N <sub>34</sub> O <sub>39</sub> S <sub>3</sub> | [1898-1912] <sup>5,8,9)</sup> | X |   |              |
| 366 | 807.3787  | 807.3792  | 4 |                                                                                  |                               | X | X |              |
| 367 | 646.1041  | 646.1049  | 5 | C <sub>132</sub> H <sub>216</sub> N <sub>40</sub> O <sub>48</sub> S <sub>3</sub> | [1898-1912] <sup>8)</sup>     | X | X |              |
| 368 | 649.3046  | 649.3039  | 5 | C <sub>132</sub> H <sub>216</sub> N <sub>40</sub> O <sub>49</sub> S <sub>3</sub> | [1898-1912] <sup>8,9)</sup>   | X |   |              |
| 369 | 889.7416  | 889.7495  | 3 |                                                                                  |                               |   | X |              |
| 370 | 667.5562  | 667.5641  | 4 | C <sub>110</sub> H <sub>179</sub> N <sub>33</sub> O <sub>38</sub> S <sub>3</sub> | [1903-1916] <sup>5,8)</sup>   |   | X | <b>K1912</b> |
| 371 | 810.1289  | 810.1303  | 4 |                                                                                  |                               | X | X |              |
| 372 | 648.3060  | 648.3058  | 5 | C <sub>134</sub> H <sub>217</sub> N <sub>39</sub> O <sub>48</sub> S <sub>3</sub> | [1903-1916] <sup>8)</sup>     | X | X |              |

|     |           |           |   |                                                                                  |                             |                                                                                  |                           |              |   |
|-----|-----------|-----------|---|----------------------------------------------------------------------------------|-----------------------------|----------------------------------------------------------------------------------|---------------------------|--------------|---|
| 373 | 814.1230  | 814.1291  | 4 | C <sub>134</sub> H <sub>217</sub> N <sub>39</sub> O <sub>49</sub> S <sub>3</sub> | [1903-1916] <sup>8,9)</sup> | X                                                                                |                           |              |   |
| 374 | 651.4969  | 651.5048  | 5 |                                                                                  |                             |                                                                                  |                           |              | X |
| 375 | 619.6306  | 619.6385  | 3 | C <sub>77</sub> H <sub>129</sub> N <sub>23</sub> O <sub>26</sub> S <sub>2</sub>  | [1910-1916] <sup>5)</sup>   |                                                                                  | X                         |              |   |
| 376 | 607.5392  | 607.5471  | 4 | C <sub>101</sub> H <sub>167</sub> N <sub>29</sub> O <sub>36</sub> S <sub>2</sub> | [1910-1916]                 |                                                                                  | X                         |              |   |
| 377 | 611.5381  | 611.5458  | 4 | C <sub>101</sub> H <sub>167</sub> N <sub>29</sub> O <sub>37</sub> S <sub>2</sub> | [1910-1916] <sup>9)</sup>   |                                                                                  | X                         |              |   |
| 378 | 941.1236  | 941.1259  | 3 | C <sub>126</sub> H <sub>189</sub> N <sub>33</sub> O <sub>39</sub> S <sub>1</sub> | [1913-1928] <sup>5)</sup>   |                                                                                  | X                         | <b>K1916</b> |   |
| 379 | 706.0885  | 706.0964  | 4 |                                                                                  |                             |                                                                                  |                           |              |   |
| 380 | 1131.2161 | 1131.2142 | 3 | C <sub>150</sub> H <sub>227</sub> N <sub>39</sub> O <sub>49</sub> S <sub>1</sub> | [1913-1928]                 | X                                                                                | X                         |              |   |
| 381 | 848.6628  | 848.6626  | 4 |                                                                                  |                             |                                                                                  | X                         |              | X |
| 382 | 679.1238  | 679.1317  | 5 |                                                                                  |                             |                                                                                  |                           |              | X |
| 383 | 1137.2104 | 1137.2177 | 3 | C <sub>150</sub> H <sub>229</sub> N <sub>39</sub> O <sub>50</sub> S <sub>1</sub> | [1913-1928] <sup>6)</sup>   |                                                                                  | H                         |              |   |
| 384 | 853.1578  | 853.1652  | 4 |                                                                                  |                             |                                                                                  |                           |              | H |
| 385 | 682.7263  | 682.7338  | 5 |                                                                                  |                             |                                                                                  |                           |              | H |
| 386 | 842.0769  | 842.0733  | 3 |                                                                                  |                             | C <sub>111</sub> H <sub>166</sub> N <sub>32</sub> O <sub>34</sub> S <sub>1</sub> | [1917-1929] <sup>5)</sup> | X            | X |
| 387 | 1032.1610 | 1032.1616 | 3 | C <sub>135</sub> H <sub>204</sub> N <sub>38</sub> O <sub>44</sub> S <sub>1</sub> | [1917-1929]                 | X                                                                                |                           | <b>K1928</b> |   |
| 388 | 774.3732  | 774.3732  | 4 |                                                                                  |                             |                                                                                  | X                         |              | X |
| 389 | 1082.1802 | 1082.1881 | 3 | C <sub>143</sub> H <sub>214</sub> N <sub>40</sub> O <sub>45</sub> S              | [1917-1935] <sup>5)</sup>   |                                                                                  | X                         |              |   |
| 390 | 954.4606  | 954.4592  | 4 | C <sub>167</sub> H <sub>252</sub> N <sub>46</sub> O <sub>55</sub> S <sub>1</sub> | [1917-1935]                 | X                                                                                | X                         |              |   |
| 391 | 763.7697  | 763.7690  | 5 |                                                                                  |                             |                                                                                  | X                         |              | X |
| 392 | 725.5295  | 725.5355  | 5 | C <sub>154</sub> H <sub>231</sub> N <sub>45</sub> O <sub>55</sub> S              | [1929-1944]                 | X                                                                                |                           | <b>K1935</b> |   |
| 393 | 604.7730  | 604.7809  | 6 |                                                                                  |                             |                                                                                  |                           |              |   |
| 394 | 899.4106  | 899.4185  | 7 | C <sub>278</sub> H <sub>406</sub> N <sub>72</sub> O <sub>92</sub> S <sub>2</sub> | [1929-1967]                 |                                                                                  | X                         |              |   |
| 395 | 787.1093  | 787.1171  | 8 |                                                                                  |                             |                                                                                  |                           |              |   |
| 396 | 725.0758  | 725.0759  | 4 | C <sub>124</sub> H <sub>181</sub> N <sub>35</sub> O <sub>44</sub> S <sub>1</sub> | [1930-1944] <sup>5)</sup>   | X                                                                                | X                         |              |   |
| 397 | 867.6415  | 867.6421  | 4 | C <sub>148</sub> H <sub>219</sub> N <sub>41</sub> O <sub>54</sub> S <sub>1</sub> | [1930-1944]                 | X                                                                                | X                         |              |   |
| 398 | 694.3154  | 694.3152  | 5 |                                                                                  |                             |                                                                                  | X                         |              | X |
| 399 | 622.6776  | 622.6855  | 5 | C <sub>134</sub> H <sub>197</sub> N <sub>37</sub> O <sub>47</sub> S              | [1933-1944]                 |                                                                                  | X                         |              |   |
| 400 | 729.5714  | 729.5786  | 4 | C <sub>124</sub> H <sub>183</sub> N <sub>35</sub> O <sub>45</sub> S <sub>1</sub> | [1930-1944] <sup>5,6)</sup> |                                                                                  | H                         |              |   |
| 401 | 583.8571  | 583.8644  | 5 |                                                                                  |                             |                                                                                  |                           |              |   |
| 402 | 697.9094  | 697.9174  | 5 | C <sub>148</sub> H <sub>221</sub> N <sub>41</sub> O <sub>55</sub> S <sub>1</sub> | [1930-1944] <sup>6)</sup>   |                                                                                  | H                         |              |   |
| 403 | 581.7579  | 581.7658  | 6 |                                                                                  |                             |                                                                                  |                           |              | H |
| 404 | 1022.4760 | 1022.4727 | 5 | C <sub>221</sub> H <sub>331</sub> N <sub>59</sub> O <sub>77</sub> S <sub>2</sub> | [1945-1974]                 | X                                                                                | X                         | <b>K1967</b> |   |
| 405 | 680.9995  | 681.0074  | 3 | C <sub>90</sub> H <sub>141</sub> N <sub>23</sub> O <sub>29</sub> S               | [2023-2030] <sup>5)</sup>   | X                                                                                | X                         | <b>K2025</b> |   |
| 406 | 653.5659  | 653.5737  | 4 | C <sub>114</sub> H <sub>179</sub> N <sub>29</sub> O <sub>39</sub> S              | [2023-2030]                 |                                                                                  | X                         |              |   |
| 407 | 989.9914  | 989.9993  | 2 | C <sub>85</sub> H <sub>139</sub> N <sub>23</sub> O <sub>29</sub> S <sub>1</sub>  | [2026-2033] <sup>5)</sup>   |                                                                                  | X                         | <b>K2030</b> |   |
| 408 | 660.3355  | 660.3355  | 3 |                                                                                  |                             |                                                                                  | X                         |              | X |
| 409 | 850.4239  | 850.4238  | 3 | C <sub>109</sub> H <sub>177</sub> N <sub>29</sub> O <sub>39</sub> S <sub>1</sub> | [2026-2033]                 | X                                                                                | X                         |              |   |
| 410 | 638.0701  | 638.0698  | 4 |                                                                                  |                             |                                                                                  | X                         |              | X |
| 411 | 856.4190  | 856.4273  | 3 | C <sub>109</sub> H <sub>179</sub> N <sub>29</sub> O <sub>40</sub> S <sub>1</sub> | [2026-2033] <sup>6)</sup>   |                                                                                  | H                         |              |   |
| 412 | 736.1038  | 736.1130  | 4 | C <sub>124</sub> H <sub>205</sub> N <sub>33</sub> O <sub>45</sub> S <sub>2</sub> | [2026-2036] <sup>6)</sup>   |                                                                                  | H                         |              |   |
| 413 | 866.9178  | 866.9220  | 2 | C <sub>71</sub> H <sub>121</sub> N <sub>21</sub> O <sub>25</sub> S <sub>2</sub>  | [2031-2036] <sup>5)</sup>   | X                                                                                |                           | <b>K2033</b> |   |
| 414 | 578.2851  | 578.2839  | 3 |                                                                                  |                             |                                                                                  | X                         |              |   |
| 415 | 583.6077  | 583.6156  | 3 | C <sub>71</sub> H <sub>121</sub> N <sub>21</sub> O <sub>26</sub> S <sub>2</sub>  | [2031-2036] <sup>5,9)</sup> | X                                                                                | X                         |              |   |
| 416 | 768.3729  | 768.3723  | 3 | C <sub>95</sub> H <sub>159</sub> N <sub>27</sub> O <sub>35</sub> S <sub>2</sub>  | [2031-2036]                 | X                                                                                | X                         |              |   |
| 417 | 576.5322  | 576.5312  | 4 |                                                                                  |                             |                                                                                  | X                         |              | X |
| 418 | 773.7045  | 773.7039  | 3 | C <sub>95</sub> H <sub>159</sub> N <sub>27</sub> O <sub>36</sub> S <sub>2</sub>  | [2031-2036] <sup>9)</sup>   | X                                                                                |                           |              |   |
| 419 | 580.5301  | 580.5299  | 4 |                                                                                  |                             |                                                                                  | X                         |              | X |

|     |           |           |   |                                                                                  |                             |   |   |       |
|-----|-----------|-----------|---|----------------------------------------------------------------------------------|-----------------------------|---|---|-------|
| 420 | 981.1381  | 981.1481  | 3 | C <sub>124</sub> H <sub>205</sub> N <sub>33</sub> O <sub>45</sub> S <sub>2</sub> | [2026-2036] <sup>6)</sup>   |   | H |       |
| 421 | 736.1038  | 736.1130  | 4 |                                                                                  |                             |   | H |       |
| 422 | 589.0829  | 589.0920  | 5 |                                                                                  |                             |   | H |       |
| 423 | 744.0252  | 744.0251  | 3 | C <sub>91</sub> H <sub>152</sub> N <sub>28</sub> O <sub>33</sub> S <sub>2</sub>  | [2034-2038]                 |   | X | K2036 |
| 424 | 558.2705  | 558.2708  | 4 |                                                                                  |                             |   | X |       |
| 425 | 881.75134 | 881.7568  | 3 | C <sub>113</sub> H <sub>179</sub> N <sub>31</sub> O <sub>38</sub> S <sub>2</sub> | [2034-2046] <sup>5)</sup>   | X |   |       |
| 426 | 661.5690  | 661.5695  | 4 |                                                                                  |                             | X | X |       |
| 427 | 1071.8372 | 1071.8451 | 3 | C <sub>137</sub> H <sub>217</sub> N <sub>37</sub> O <sub>48</sub> S <sub>2</sub> | [2034-2046]                 |   | X |       |
| 428 | 804.1359  | 804.1358  | 4 |                                                                                  |                             | X | X |       |
| 429 | 643.5099  | 643.5102  | 5 |                                                                                  |                             | X | X |       |
| 430 | 808.1352  | 808.1345  | 4 |                                                                                  |                             |   | X |       |
| 431 | 646.7136  | 646.7092  | 5 | C <sub>137</sub> H <sub>217</sub> N <sub>37</sub> O <sub>49</sub> S <sub>2</sub> | [2034-2046] <sup>9)</sup>   |   | X |       |
| 432 | 705.6749  | 705.6828  | 3 |                                                                                  |                             |   | X |       |
| 433 | 916.1302  | 916.1381  | 3 | C <sub>121</sub> H <sub>192</sub> N <sub>34</sub> O <sub>37</sub> S              | [2037-2050] <sup>5)</sup>   |   | X | K2046 |
| 434 | 687.3477  | 687.3555  | 4 |                                                                                  |                             |   | X |       |
| 435 | 550.0781  | 550.0860  | 5 |                                                                                  |                             |   | X |       |
| 436 | 1106.2185 | 1106.2264 | 3 | C <sub>145</sub> H <sub>230</sub> N <sub>40</sub> O <sub>47</sub> S <sub>1</sub> | [2037-2050]                 |   | X |       |
| 437 | 829.9225  | 829.9218  | 4 |                                                                                  |                             | X | X |       |
| 438 | 664.1386  | 664.1390  | 5 |                                                                                  |                             | X | X |       |
| 439 | 553.6176  | 553.6171  | 6 |                                                                                  |                             | X | X |       |
| 440 | 826.4116  | 826.4097  | 3 | C <sub>109</sub> H <sub>169</sub> N <sub>29</sub> O <sub>35</sub> S <sub>1</sub> | [2039-2050] <sup>5)</sup>   | X | X |       |
| 441 | 620.0587  | 620.0593  | 4 |                                                                                  |                             | X | X |       |
| 442 | 762.6245  | 762.6255  | 4 | C <sub>133</sub> H <sub>207</sub> N <sub>35</sub> O <sub>45</sub> S <sub>1</sub> | [2039-2050]                 | X | X |       |
| 443 | 610.3008  | 610.3019  | 5 |                                                                                  |                             | X | X |       |
| 444 | 834.4177  | 834.4244  | 4 |                                                                                  |                             |   | H |       |
| 445 | 667.7342  | 667.7411  | 5 | C <sub>145</sub> H <sub>232</sub> N <sub>40</sub> O <sub>48</sub> S <sub>1</sub> | [2037-2050] <sup>6)</sup>   |   | H |       |
| 446 | 556.6118  | 556.6189  | 6 |                                                                                  |                             |   | H |       |
| 447 | 536.9246  | 536.9320  | 3 | C <sub>67</sub> H <sub>109</sub> N <sub>21</sub> O <sub>23</sub> S               | [2047-2051] <sup>5)</sup>   |   | X | K2050 |
| 448 | 684.0007  | 684.0062  | 3 | C <sub>86</sub> H <sub>140</sub> N <sub>26</sub> O <sub>30</sub> S               | [2047-2056] <sup>5)</sup>   |   | X |       |
| 449 | 760.0366  | 760.0432  | 3 | C <sub>96</sub> H <sub>156</sub> N <sub>28</sub> O <sub>34</sub> S               | [2047-2058] <sup>5)</sup>   |   | X |       |
| 450 | 502.4957  | 502.5016  | 4 | C <sub>82</sub> H <sub>135</sub> N <sub>29</sub> O <sub>28</sub> S               | [2071-2079] <sup>5)</sup>   | X | X | K2073 |
| 451 | 470.2350  | 470.2410  | 4 | C <sub>77</sub> H <sub>128</sub> N <sub>28</sub> O <sub>25</sub> S               | [2072-2079] <sup>5)</sup>   | X | X |       |
| 452 | 490.4411  | 490.4473  | 5 | C <sub>101</sub> H <sub>166</sub> N <sub>34</sub> O <sub>35</sub> S              | [2072-2079]                 | X | X |       |
| 453 | 1045.0104 | 1045.0125 | 2 | C <sub>85</sub> H <sub>145</sub> N <sub>27</sub> O <sub>30</sub> S <sub>2</sub>  | [2097-2106] <sup>5)</sup>   |   | X | K2102 |
| 454 | 697.0102  | 697.0109  | 3 |                                                                                  |                             | X | X |       |
| 455 | 523.00228 | 523.0101  | 4 |                                                                                  |                             | X | X |       |
| 456 | 702.3435  | 702.3425  | 3 | C <sub>85</sub> H <sub>145</sub> N <sub>27</sub> O <sub>31</sub> S <sub>2</sub>  | [2097-2106] <sup>5,9)</sup> | X | X |       |
| 457 | 887.0999  | 887.0992  | 3 | C <sub>109</sub> H <sub>183</sub> N <sub>33</sub> O <sub>40</sub> S <sub>2</sub> | [2097-2106]                 | X | X |       |
| 458 | 665.5765  | 665.5764  | 4 |                                                                                  |                             | X | X |       |
| 459 | 532.6548  | 532.6627  | 5 |                                                                                  |                             |   | X |       |
| 460 | 892.4281  | 892.4308  | 3 |                                                                                  |                             |   | X |       |
| 461 | 669.5761  | 669.5751  | 4 | C <sub>109</sub> H <sub>183</sub> N <sub>33</sub> O <sub>41</sub> S <sub>2</sub> | [2097-2106] <sup>9)</sup>   | X | X |       |
| 462 | 658.6636  | 658.6686  | 3 |                                                                                  |                             |   | X |       |
| 463 | 636.8118  | 636.8196  | 4 | C <sub>105</sub> H <sub>178</sub> N <sub>32</sub> O <sub>37</sub> S <sub>2</sub> | [2098-2106]                 | X | X |       |
| 464 | 640.8105  | 640.8184  | 4 | C <sub>105</sub> H <sub>178</sub> N <sub>32</sub> O <sub>38</sub> S <sub>2</sub> | [2098-2106] <sup>9)</sup>   |   | X |       |
| 465 | 703.0065  | 703.0144  | 3 | C <sub>85</sub> H <sub>147</sub> N <sub>27</sub> O <sub>31</sub> S <sub>2</sub>  | [2097-2106] <sup>5,6)</sup> |   | H |       |
| 466 | 527.5049  | 527.5128  | 4 |                                                                                  |                             |   | H |       |

|     |           |           |   |                                                                                  |                             |   |   |       |   |
|-----|-----------|-----------|---|----------------------------------------------------------------------------------|-----------------------------|---|---|-------|---|
| 467 | 893.0948  | 893.1027  | 3 | C <sub>109</sub> H <sub>185</sub> N <sub>33</sub> O <sub>41</sub> S <sub>2</sub> | [2097-2106] <sup>6)</sup>   |   | H |       |   |
| 468 | 670.0711  | 670.0790  | 4 |                                                                                  |                             |   | H |       |   |
| 469 | 536.2569  | 536.2648  | 5 |                                                                                  |                             |   | H |       |   |
| 470 | 674.0689  | 674.0778  | 4 | C <sub>109</sub> H <sub>185</sub> N <sub>33</sub> O <sub>42</sub> S <sub>2</sub> | [2097-2106] <sup>6,9)</sup> |   | H |       |   |
| 471 | 539.4551  | 539.4637  | 5 |                                                                                  |                             |   | H |       |   |
| 472 | 1001.4974 | 1001.4947 | 5 | C <sub>224</sub> H <sub>344</sub> N <sub>56</sub> O <sub>68</sub> S <sub>3</sub> | [2154-2183]                 | X | X | K2179 |   |
| 473 | 828.60706 | 828.6136  | 5 | C <sub>185</sub> H <sub>284</sub> N <sub>48</sub> O <sub>56</sub> S <sub>2</sub> | [2161-2183]                 | X |   |       |   |
| 474 | 1004.4886 | 1004.4943 | 3 | C <sub>131</sub> H <sub>207</sub> N <sub>33</sub> O <sub>46</sub> S              | [2180-2192]                 |   | X | K2183 |   |
| 475 | 1107.8684 | 1107.8683 | 3 | C <sub>151</sub> H <sub>221</sub> N <sub>37</sub> O <sub>46</sub> S <sub>1</sub> | [2180-2198] <sup>5)</sup>   |   | X |       |   |
| 476 | 973.7210  | 973.7194  | 4 | C <sub>175</sub> H <sub>259</sub> N <sub>43</sub> O <sub>56</sub> S <sub>1</sub> | [2180-2198]                 | X | X |       |   |
| 477 | 1095.0389 | 1095.0381 | 4 | C <sub>199</sub> H <sub>294</sub> N <sub>50</sub> O <sub>60</sub> S <sub>1</sub> | [2180-2208] <sup>5)</sup>   |   | X |       |   |
| 478 | 1237.6053 | 1237.6044 | 4 | C <sub>223</sub> H <sub>332</sub> N <sub>56</sub> O <sub>70</sub> S <sub>1</sub> | [2180-2208]                 |   | X |       |   |
| 479 | 1471.7151 | 1471.7148 | 3 | C <sub>202</sub> H <sub>294</sub> N <sub>50</sub> O <sub>60</sub> S <sub>1</sub> | [2184-2212] <sup>5)</sup>   |   | X | K2208 |   |
| 480 | 1104.0413 | 1104.0381 | 4 |                                                                                  |                             |   | X |       |   |
| 481 | 1246.6050 | 1246.6044 | 4 | C <sub>226</sub> H <sub>332</sub> N <sub>56</sub> O <sub>70</sub> S <sub>1</sub> | [2184-2212]                 | X | X |       |   |
| 482 | 997.4853  | 997.4850  | 5 |                                                                                  |                             |   | X |       | X |
| 483 | 831.4113  | 831.4055  | 6 |                                                                                  |                             |   | X |       |   |
| 484 | 1035.1693 | 1035.1771 | 3 | C <sub>135</sub> H <sub>211</sub> N <sub>37</sub> O <sub>45</sub> S              | [2199-2212]                 | X | X |       |   |
| 485 | 776.6325  | 776.6348  | 4 |                                                                                  |                             |   | X |       | X |
| 486 | 887.0268  | 887.0342  | 5 | C <sub>202</sub> H <sub>296</sub> N <sub>50</sub> O <sub>61</sub> S <sub>1</sub> | [2184-2212] <sup>5,6)</sup> |   | H |       |   |
| 487 | 1251.0996 | 1251.1071 | 4 | C <sub>226</sub> H <sub>334</sub> N <sub>56</sub> O <sub>71</sub> S <sub>1</sub> | [2184-2212] <sup>6)</sup>   |   | H |       |   |
| 488 | 834.3997  | 834.4073  | 6 |                                                                                  |                             |   | H |       |   |
| 489 | 800.3833  | 800.3820  | 3 | C <sub>102</sub> H <sub>159</sub> N <sub>29</sub> O <sub>36</sub> S <sub>1</sub> | [2209-2220] <sup>5)</sup>   | X | X | K2212 |   |
| 490 | 600.5363  | 600.5384  | 4 |                                                                                  |                             |   | X |       |   |
| 491 | 990.4624  | 990.4703  | 3 | C <sub>126</sub> H <sub>197</sub> N <sub>35</sub> O <sub>46</sub> S <sub>1</sub> | [2209-2220]                 |   | X |       |   |
| 492 | 743.1045  | 743.1046  | 4 |                                                                                  |                             |   | X |       | X |
| 493 | 594.6789  | 594.6853  | 5 |                                                                                  |                             |   | X |       |   |
| 494 | 605.0334  | 605.0411  | 4 | C <sub>102</sub> H <sub>161</sub> N <sub>29</sub> O <sub>37</sub> S <sub>1</sub> | [2209-2220] <sup>5,6)</sup> |   | H |       |   |
| 495 | 747.5998  | 747.6073  | 4 | C <sub>126</sub> H <sub>199</sub> N <sub>35</sub> O <sub>47</sub> S <sub>1</sub> | [2209-2220] <sup>6)</sup>   |   | H |       |   |
| 496 | 790.0796  | 790.0798  | 3 | C <sub>107</sub> H <sub>166</sub> N <sub>30</sub> O <sub>29</sub> S <sub>1</sub> | [2299-2309] <sup>5)</sup>   | X | X | K2308 |   |
| 497 | 980.1602  | 980.1681  | 3 | C <sub>131</sub> H <sub>204</sub> N <sub>36</sub> O <sub>39</sub> S <sub>1</sub> | [2299-2309]                 |   | X |       |   |
| 498 | 735.3780  | 735.3780  | 4 |                                                                                  |                             |   | X |       | X |
| 499 | 986.1629  | 986.1716  | 3 | C <sub>131</sub> H <sub>206</sub> N <sub>36</sub> O <sub>40</sub> S <sub>1</sub> | [2299-2309] <sup>6)</sup>   |   | H |       |   |
| 500 | 770.3677  | 770.3755  | 5 | C <sub>159</sub> H <sub>263</sub> N <sub>51</sub> O <sub>52</sub> S <sub>4</sub> | [2309-2326] <sup>8,9)</sup> |   | X | K2311 |   |
| 501 | 496.2516  | 496.2594  | 4 | C <sub>84</sub> H <sub>136</sub> N <sub>30</sub> O <sub>24</sub> S               | [2310-2316] <sup>5)</sup>   |   | X |       |   |
| 502 | 397.2013  | 397.2091  | 5 |                                                                                  |                             |   | X |       |   |
| 503 | 638.8247  | 638.8257  | 4 | C <sub>108</sub> H <sub>174</sub> N <sub>36</sub> O <sub>34</sub> S <sub>1</sub> | [2310-2316]                 | X | X |       |   |
| 504 | 511.2557  | 511.2621  | 5 |                                                                                  |                             |   | X |       |   |
| 505 | 599.7925  | 599.8004  | 4 | C <sub>102</sub> H <sub>162</sub> N <sub>32</sub> O <sub>33</sub> S              | [2311-2316]                 | X | X |       |   |
| 506 | 480.0340  | 480.0419  | 5 |                                                                                  |                             |   | X | X     |   |
| 507 | 709.0807  | 709.0811  | 4 | C <sub>117</sub> H <sub>189</sub> N <sub>37</sub> O <sub>37</sub> S <sub>4</sub> | [2312-2326] <sup>5,8)</sup> | X | X | K2316 |   |
| 508 | 681.5115  | 681.5193  | 5 | C <sub>141</sub> H <sub>227</sub> N <sub>43</sub> O <sub>47</sub> S <sub>4</sub> | [2312-2326] <sup>8)</sup>   |   | X |       |   |
| 509 | 568.0941  | 568.1008  | 6 |                                                                                  |                             |   | X |       |   |
| 510 | 684.7105  | 684.7184  | 5 | C <sub>141</sub> H <sub>227</sub> N <sub>43</sub> O <sub>48</sub> S <sub>4</sub> | [2312-2326] <sup>8,9)</sup> |   | X |       |   |
| 511 | 1012.9605 | 1012.9593 | 4 | C <sub>172</sub> H <sub>262</sub> N <sub>52</sub> O <sub>52</sub> S <sub>5</sub> | [2317-2342] <sup>5,8)</sup> | X |   | K2326 |   |
| 512 | 810.5692  | 810.5690  | 5 |                                                                                  |                             |   | X |       | X |
| 513 | 675.6343  | 675.6422  | 6 |                                                                                  |                             |   |   |       | X |



|     |           |           |   |                                                                                  |                               |                                                                                  |                             |              |   |
|-----|-----------|-----------|---|----------------------------------------------------------------------------------|-------------------------------|----------------------------------------------------------------------------------|-----------------------------|--------------|---|
| 514 | 813.7601  | 813.7680  | 5 | C <sub>172</sub> H <sub>262</sub> N <sub>52</sub> O <sub>53</sub> S <sub>5</sub> | [2317-2342] <sup>5,8,9)</sup> |                                                                                  | X                           |              |   |
| 515 | 1155.5272 | 1155.5255 | 4 | C <sub>196</sub> H <sub>300</sub> N <sub>58</sub> O <sub>62</sub> S <sub>5</sub> | [2317-2342] <sup>8)</sup>     | X                                                                                | X                           |              |   |
| 516 | 924.6141  | 924.6220  | 5 |                                                                                  |                               |                                                                                  |                             | X            |   |
| 517 | 927.8157  | 927.8210  | 5 | C <sub>196</sub> H <sub>300</sub> N <sub>58</sub> O <sub>63</sub> S <sub>5</sub> | [2317-2342] <sup>8,9)</sup>   |                                                                                  | X                           |              |   |
| 518 | 773.3455  | 773.3521  | 6 |                                                                                  |                               |                                                                                  |                             | X            |   |
| 519 | 814.1612  | 814.1711  | 5 | C <sub>172</sub> H <sub>264</sub> N <sub>52</sub> O <sub>53</sub> S <sub>5</sub> | [2317-2342] <sup>8,6,5)</sup> |                                                                                  | H                           |              |   |
| 520 | 678.6344  | 678.6439  | 6 |                                                                                  |                               |                                                                                  |                             | H            |   |
| 521 | 928.2170  | 928.2241  | 5 | C <sub>196</sub> H <sub>302</sub> N <sub>58</sub> O <sub>63</sub> S <sub>5</sub> | [2317-2342] <sup>8,6)</sup>   |                                                                                  | H                           |              |   |
| 522 | 773.6809  | 773.6880  | 6 |                                                                                  |                               |                                                                                  |                             | H            |   |
| 523 | 663.2979  | 663.3052  | 7 |                                                                                  |                               |                                                                                  |                             | H            |   |
| 524 | 547.5096  | 547.5175  | 4 | C <sub>88</sub> H <sub>147</sub> N <sub>29</sub> O <sub>34</sub> S               | [2381-2385]                   |                                                                                  | X                           | <b>K2381</b> |   |
| 525 | 894.8991  | 894.9070  | 4 | C <sub>148</sub> H <sub>234</sub> N <sub>42</sub> O <sub>55</sub> S <sub>3</sub> | [2408-2426] <sup>8)</sup>     |                                                                                  | X                           |              |   |
| 526 | 793.9553  | 793.9556  | 5 | C <sub>168</sub> H <sub>253</sub> N <sub>49</sub> O <sub>55</sub> S <sub>4</sub> | [2408-2433] <sup>5,8)</sup>   |                                                                                  | X                           |              |   |
| 527 | 908.00072 | 908.0086  | 5 | C <sub>192</sub> H <sub>291</sub> N <sub>55</sub> O <sub>65</sub> S <sub>4</sub> | [2408-2433] <sup>8)</sup>     |                                                                                  | X                           |              |   |
| 528 | 756.8403  | 756.8418  | 6 |                                                                                  |                               |                                                                                  |                             | X            |   |
| 529 | 726.6587  | 726.6653  | 6 | C <sub>187</sub> H <sub>280</sub> N <sub>54</sub> O <sub>59</sub> S <sub>4</sub> | [2408-2436] <sup>5,8)</sup>   | X                                                                                |                             |              |   |
| 530 | 985.8549  | 985.8499  | 5 | C <sub>211</sub> H <sub>318</sub> N <sub>60</sub> O <sub>69</sub> S <sub>4</sub> | [2408-2436] <sup>8)</sup>     | X                                                                                |                             |              |   |
| 531 | 821.7090  | 821.7095  | 6 |                                                                                  |                               |                                                                                  | X                           | X            |   |
| 532 | 704.4586  | 704.4664  | 7 |                                                                                  |                               |                                                                                  |                             | X            |   |
| 533 | 989.0410  | 989.0488  | 5 | C <sub>211</sub> H <sub>318</sub> N <sub>60</sub> O <sub>70</sub> S <sub>4</sub> | [2408-2436] <sup>8,9)</sup>   |                                                                                  | X                           |              |   |
| 534 | 824.3687  | 824.3754  | 6 |                                                                                  |                               |                                                                                  | X                           | X            |   |
| 535 | 989.0410  | 989.0488  | 5 |                                                                                  |                               |                                                                                  |                             | X            |   |
| 536 | 824.3675  | 824.3754  | 6 |                                                                                  |                               |                                                                                  | X                           | X            |   |
| 537 | 706.7446  | 706.7514  | 7 |                                                                                  |                               | X                                                                                | X                           |              |   |
| 538 | 707.0314  | 707.0394  | 7 | C <sub>211</sub> H <sub>320</sub> N <sub>60</sub> O <sub>70</sub> S <sub>4</sub> | [2408-2436] <sup>6,8)</sup>   |                                                                                  | H                           |              |   |
| 539 | 857.3980  | 857.4059  | 4 | C <sub>151</sub> H <sub>224</sub> N <sub>42</sub> O <sub>46</sub> S <sub>2</sub> | [2426-2444] <sup>5)</sup>     |                                                                                  | X                           |              |   |
| 540 | 686.1259  | 686.1263  | 5 |                                                                                  |                               |                                                                                  | X                           | X            |   |
| 541 | 800.1714  | 800.1793  | 5 | C <sub>175</sub> H <sub>262</sub> N <sub>48</sub> O <sub>56</sub> S <sub>2</sub> | [2426-2444]                   |                                                                                  | X                           |              |   |
| 542 | 803.3718  | 803.3782  | 5 | C <sub>175</sub> H <sub>262</sub> N <sub>48</sub> O <sub>57</sub> S <sub>2</sub> | [2426-2444] <sup>9)</sup>     | X                                                                                | X                           | <b>2436</b>  |   |
| 543 | 780.0558  | 780.0553  | 3 | C <sub>102</sub> H <sub>160</sub> N <sub>28</sub> O <sub>33</sub> S <sub>1</sub> | [2434-2444] <sup>5)</sup>     | X                                                                                | X                           |              |   |
| 544 | 970.1357  | 970.1436  | 3 | C <sub>126</sub> H <sub>198</sub> N <sub>34</sub> O <sub>43</sub> S <sub>1</sub> | [2434-2444]                   | X                                                                                |                             |              |   |
| 545 | 727.8608  | 727.8596  | 4 |                                                                                  |                               |                                                                                  | X                           | X            |   |
| 546 | 1369.6661 | 1369.6655 | 3 | C <sub>184</sub> H <sub>276</sub> N <sub>46</sub> O <sub>59</sub> S <sub>1</sub> | [2437-2463] <sup>5)</sup>     |                                                                                  | X                           |              |   |
| 547 | 1027.5017 | 1027.5011 | 4 |                                                                                  |                               |                                                                                  | X                           | X            |   |
| 548 | 822.1946  | 822.2025  | 5 |                                                                                  |                               |                                                                                  |                             | X            |   |
| 549 | 1559.7536 | 1559.7539 | 3 | C <sub>208</sub> H <sub>314</sub> N <sub>52</sub> O <sub>69</sub> S <sub>1</sub> | [2437-2463]                   | X                                                                                | X                           |              |   |
| 550 | 1170.0685 | 1170.0674 | 4 |                                                                                  |                               |                                                                                  | X                           | X            |   |
| 551 | 936.2565  | 936.2554  | 5 |                                                                                  |                               |                                                                                  | X                           | X            |   |
| 552 | 1031.9957 | 1032.0038 | 4 |                                                                                  |                               | C <sub>184</sub> H <sub>278</sub> N <sub>46</sub> O <sub>60</sub> S <sub>1</sub> | [2437-2463] <sup>5,6)</sup> |              | H |
| 553 | 825.7966  | 825.8046  | 5 |                                                                                  |                               |                                                                                  |                             | H            |   |
| 554 | 1174.5621 | 1174.5699 | 4 | C <sub>208</sub> H <sub>316</sub> N <sub>52</sub> O <sub>70</sub> S <sub>1</sub> | [2437-2463] <sup>6)</sup>     |                                                                                  | H                           |              |   |
| 555 | 939.8496  | 939.8575  | 5 |                                                                                  |                               |                                                                                  |                             | H            |   |
| 556 | 783.3747  | 783.3826  | 6 |                                                                                  |                               |                                                                                  |                             | H            |   |
| 557 | 912.09847 | 912.1064  | 3 | C <sub>120</sub> H <sub>184</sub> N <sub>30</sub> O <sub>41</sub> S              | [2456-2465]                   |                                                                                  | X                           | <b>K2463</b> |   |
| 558 | 891.7765  | 891.7770  | 3 | C <sub>110</sub> H <sub>185</sub> N <sub>33</sub> O <sub>42</sub> S <sub>1</sub> | [2508-2522] <sup>5)</sup>     | X                                                                                | X                           |              |   |
| 559 | 1081.8637 | 1081.8654 | 3 | C <sub>134</sub> H <sub>223</sub> N <sub>39</sub> O <sub>52</sub> S <sub>1</sub> | [2508-2522]                   | X                                                                                | X                           | <b>K2508</b> |   |
| 560 | 811.6508  | 811.6509  | 4 |                                                                                  |                               |                                                                                  |                             | X            | X |

|     |           |          |   |                                                                                  |                             |                                                                     |                           |       |
|-----|-----------|----------|---|----------------------------------------------------------------------------------|-----------------------------|---------------------------------------------------------------------|---------------------------|-------|
| 561 | 946.4485  | 946.4562 | 2 | C <sub>81</sub> H <sub>130</sub> N <sub>22</sub> O <sub>26</sub> S <sub>2</sub>  | [2574-2580] <sup>5)</sup>   |                                                                     | X                         | K2577 |
| 562 | 710.14588 | 710.1537 | 5 | C <sub>155</sub> H <sub>240</sub> N <sub>46</sub> O <sub>46</sub> S <sub>2</sub> | [2719-2739] <sup>5,8)</sup> |                                                                     | X                         | K2735 |
| 563 | 824.2070  | 824.2067 | 5 | C <sub>179</sub> H <sub>278</sub> N <sub>52</sub> O <sub>56</sub> S <sub>2</sub> | [2719-2739] <sup>8)</sup>   | X                                                                   | X                         |       |
| 564 | 686.99905 | 687.0669 | 6 |                                                                                  |                             |                                                                     | X                         |       |
| 565 | 807.6505  | 807.6491 | 4 | C <sub>140</sub> H <sub>219</sub> N <sub>41</sub> O <sub>43</sub> S <sub>2</sub> | [2721-2739] <sup>5,8)</sup> | X                                                                   | X                         |       |
| 566 | 760.3733  | 760.3738 | 5 | C <sub>164</sub> H <sub>257</sub> N <sub>47</sub> O <sub>53</sub> S <sub>2</sub> | [2721-2739] <sup>8)</sup>   | X                                                                   | X                         |       |
| 567 | 688.7094  | 688.7144 | 3 | C <sub>90</sub> H <sub>154</sub> N <sub>26</sub> O <sub>27</sub> S               | [2731-2739] <sup>5)</sup>   | X                                                                   | X                         |       |
| 568 | 878.7948  | 878.8027 | 3 | C <sub>114</sub> H <sub>192</sub> N <sub>32</sub> O <sub>37</sub> S              | [2731-2739]                 |                                                                     | X                         |       |
| 569 | 659.3468  | 659.3540 | 4 |                                                                                  |                             |                                                                     | X                         |       |
| 570 | 838.3967  | 838.4046 | 3 | C <sub>108</sub> H <sub>169</sub> N <sub>29</sub> O <sub>38</sub> S              | [2736-2743]                 | X                                                                   | X                         | K2739 |
| 571 | 729.3596  | 729.3607 | 3 | C <sub>93</sub> H <sub>148</sub> N <sub>28</sub> O <sub>31</sub> S <sub>1</sub>  | [2736-2745] <sup>5)</sup>   | X                                                                   | X                         |       |
| 572 | 547.2690  | 547.2725 | 4 |                                                                                  |                             |                                                                     | X                         |       |
| 573 | 919.4480  | 919.4490 | 3 | C <sub>117</sub> H <sub>186</sub> N <sub>34</sub> O <sub>41</sub> S <sub>1</sub> | [2736-2745]                 | X                                                                   | X                         |       |
| 574 | 689.8375  | 689.8387 | 4 |                                                                                  |                             |                                                                     | X                         |       |
| 575 | 552.0725  | 552.0725 | 5 |                                                                                  |                             |                                                                     | X                         |       |
| 576 | 422.4539  | 422.4617 | 4 | C <sub>68</sub> H <sub>115</sub> N <sub>23</sub> O <sub>25</sub> S               | [2791-2795] <sup>5)</sup>   |                                                                     | X                         | K2792 |
| 577 | 565.0201  | 565.0280 | 4 | C <sub>92</sub> H <sub>153</sub> N <sub>29</sub> O <sub>35</sub> S               | [2791-2795]                 |                                                                     | X                         |       |
| 578 | 710.3357  | 710.3363 | 3 | C <sub>86</sub> H <sub>141</sub> N <sub>27</sub> O <sub>34</sub> S <sub>1</sub>  | [2792-2795]                 |                                                                     | X                         |       |
| 579 | 533.0034  | 533.0042 | 4 |                                                                                  |                             |                                                                     | X                         |       |
| 580 | 537.4983  | 537.5068 | 4 | C <sub>86</sub> H <sub>143</sub> N <sub>27</sub> O <sub>35</sub> S <sub>1</sub>  | [2792-2795] <sup>6)</sup>   |                                                                     | H                         |       |
| 581 | 430.1986  | 430.2070 | 5 |                                                                                  |                             |                                                                     | H                         |       |
| 582 | 989.0093  | 989.0097 | 2 | C <sub>86</sub> H <sub>141</sub> N <sub>23</sub> O <sub>28</sub> S <sub>1</sub>  | [2847-2854] <sup>5)</sup>   | X                                                                   | X                         | K2851 |
| 583 | 659.6765  | 659.6757 | 3 |                                                                                  |                             |                                                                     | X                         |       |
| 584 | 849.7626  | 849.7640 | 3 | C <sub>110</sub> H <sub>179</sub> N <sub>29</sub> O <sub>38</sub> S <sub>1</sub> | [2847-2854]                 | X                                                                   | X                         |       |
| 585 | 637.5747  | 637.5750 | 4 |                                                                                  |                             |                                                                     | X                         |       |
| 586 | 665.6699  | 665.6793 | 3 | C <sub>86</sub> H <sub>143</sub> N <sub>23</sub> O <sub>29</sub> S <sub>1</sub>  | [2847-2854] <sup>5,6)</sup> |                                                                     | H                         |       |
| 587 | 642.0691  | 642.0776 | 4 | C <sub>110</sub> H <sub>181</sub> N <sub>29</sub> O <sub>39</sub> S <sub>1</sub> | [2847-2854] <sup>6)</sup>   |                                                                     | H                         |       |
| 588 | 513.8553  | 513.8636 | 5 |                                                                                  |                             |                                                                     | H                         |       |
| 589 | 608.6244  | 608.6323 | 6 | C <sub>154</sub> H <sub>248</sub> N <sub>42</sub> O <sub>58</sub> S              | [2916-2934]                 |                                                                     | X                         | K2929 |
| 590 | 676.6543  | 676.6622 | 3 | C <sub>84</sub> H <sub>138</sub> N <sub>24</sub> O <sub>32</sub> S               | [2989-2992]                 |                                                                     | X                         | K2991 |
| 591 | 618.4613  | 618.4692 | 6 | C <sub>165</sub> H <sub>245</sub> N <sub>45</sub> O <sub>51</sub> S              | [2989-3006]                 |                                                                     | X                         |       |
| 592 | 742.5957  | 742.6019 | 4 | C <sub>124</sub> H <sub>195</sub> N <sub>39</sub> O <sub>42</sub> S <sub>2</sub> | [3027-3038]                 | X                                                                   | X                         | K3031 |
| 593 | 594.2767  | 594.2831 | 5 |                                                                                  |                             |                                                                     | X                         |       |
| 594 | 495.3960  | 495.4039 | 6 |                                                                                  |                             |                                                                     | X                         |       |
| 595 | 557.0317  | 557.0396 | 4 | C <sub>93</sub> H <sub>157</sub> N <sub>29</sub> O <sub>32</sub> S               | [3124-3128]                 |                                                                     | X                         | K3126 |
| 596 | 423.2154  | 423.2237 | 5 | C <sub>88</sub> H <sub>150</sub> N <sub>28</sub> O <sub>30</sub> S               | [3127-3130]                 |                                                                     | X                         | K3129 |
| 597 | 622.5556  | 622.5634 | 4 | C <sub>106</sub> H <sub>171</sub> N <sub>31</sub> O <sub>36</sub> S              | [3129-3136]                 |                                                                     | X                         | K3130 |
| 598 | 498.2444  | 498.2523 | 5 |                                                                                  |                             |                                                                     | X                         |       |
| 599 | 787.0449  | 787.0503 | 3 | C <sub>100</sub> H <sub>159</sub> N <sub>29</sub> O <sub>35</sub> S <sub>1</sub> | [3130-3136]                 | X                                                                   |                           |       |
| 600 | 590.5405  | 590.5397 | 4 |                                                                                  |                             |                                                                     | X                         |       |
| 601 | 594.6797  | 594.6875 | 5 | C <sub>125</sub> H <sub>197</sub> N <sub>37</sub> O <sub>45</sub> S              | [3162-3174]                 | X                                                                   | X                         | K3165 |
| 602 | 898.0106  | 898.0134 | 5 | C <sub>193</sub> H <sub>289</sub> N <sub>53</sub> O <sub>67</sub> S <sub>2</sub> | [3227-3252]                 | X                                                                   | X                         | K3244 |
| 603 | 772.6464  | 772.6543 | 4 | C <sub>137</sub> H <sub>219</sub> N <sub>37</sub> O <sub>42</sub> S              | [3303-3321] <sup>5)</sup>   |                                                                     | X                         | K3317 |
| 604 | 915.2127  | 915.2205 | 4 | C <sub>161</sub> H <sub>257</sub> N <sub>43</sub> O <sub>52</sub> S <sub>1</sub> | [3303-3321]                 |                                                                     | X                         |       |
| 605 | 732.3785  | 732.3780 | 5 |                                                                                  |                             |                                                                     | X                         |       |
| 606 | 708.3740  | 708.3790 | 4 |                                                                                  |                             | C <sub>127</sub> H <sub>204</sub> N <sub>34</sub> O <sub>37</sub> S | [3305-3321] <sup>5)</sup> |       |
| 607 | 680.9523  | 680.9578 | 5 | C <sub>151</sub> H <sub>242</sub> N <sub>40</sub> O <sub>47</sub> S              | [3305-3321]                 | X                                                                   |                           |       |

|     |           |          |   |                                                                                  |                             |   |   |              |
|-----|-----------|----------|---|----------------------------------------------------------------------------------|-----------------------------|---|---|--------------|
| 608 | 546.2803  | 546.2881 | 4 | C <sub>92</sub> H <sub>156</sub> N <sub>28</sub> O <sub>31</sub> S               | [3322-3326]                 |   | X | <b>K3325</b> |
| 609 | 778.68202 | 778.6873 | 3 | C <sub>100</sub> H <sub>148</sub> N <sub>28</sub> O <sub>35</sub> S              | [3375-3386] <sup>5)</sup>   | X | X | <b>K3385</b> |
| 610 | 968.77071 | 968.7756 | 3 | C <sub>124</sub> H <sub>186</sub> N <sub>34</sub> O <sub>45</sub> S              | [3375-3386]                 | X | X |              |
| 611 | 726.82713 | 726.8336 | 4 |                                                                                  |                             | X | X |              |
| 612 | 806.1199  | 806.1245 | 4 | C <sub>135</sub> H <sub>209</sub> N <sub>41</sub> O <sub>47</sub> S <sub>2</sub> | [3375-3394] <sup>5,8)</sup> | X |   |              |

<sup>1)</sup> Numbers inside brackets correspond to the position of the proteolytic peptide within the sequence of KLH2. All peptides from KLH2 shown in this table are linked to (C<sup>1</sup>-K<sup>16</sup>) fragment of Cys<sup>1</sup>pP0, except those peptides where it is specified if they are linked to (C<sup>1</sup>-K<sup>11</sup>), (C<sup>1</sup>-K<sup>14</sup>) or (C<sup>1</sup>-K<sup>17</sup>) fragment of Cys<sup>1</sup>pP0.

<sup>2)</sup> Identification of type 2 peptides in the KLH2-Cys<sup>1</sup>pP0 conjugate using pLink2 software [2].

<sup>3)</sup> Identification of type 2 peptides in the KLH2-Cys<sup>1</sup>pP0 conjugate using Kojak software [3].

<sup>4)</sup> Indicates the position where the peptide Cys<sup>1</sup>pP0 is added by the Michael addition to the free amino groups in the Lys residues or *N*-terminus of the KLH2.

<sup>5)</sup> Peptide from KLH2 linked to (C<sup>1</sup>-K<sup>11</sup>) fragment of Cys<sup>1</sup>pP0

<sup>6)</sup> Identification of type 2 peptides with the hydrolyzed linker

<sup>7)</sup> Peptide from KLH2 linked to (C<sup>1</sup>-K<sup>17</sup>) fragment of Cys<sup>1</sup>pP0

<sup>8)</sup> Carbamidomethylation of Cys

<sup>9)</sup> Met→ Met sulfoxide

<sup>10)</sup> Peptide from KLH2 linked to (C<sup>1</sup>-K<sup>14</sup>) fragment of Cys<sup>1</sup>pP0

**Table S8.** Identification of type 2 peptides derived from the proteolytic digestion of KLH2-Cys<sup>1</sup>pP0 conjugate with trypsin using the MED-FASP method [4]. Type 2 peptides were identified using transcyclized linker.

| #  | Assignment <sup>1)</sup>           | z                                | Conjugation site <sup>2)</sup> | m/z theor | m/z exp   | Error (ppm) | RT1 <sup>3)</sup> | RT2 <sup>4)</sup> | Ion <sup>5)</sup> |
|----|------------------------------------|----------------------------------|--------------------------------|-----------|-----------|-------------|-------------------|-------------------|-------------------|
| 1  | [1-7]-(C1-K16)                     | 4                                | Nterm                          | 596.8019  | 596.8028  | -1.51       | 15.29             | 23.19             | 3                 |
| 2  | [7-22]-(C1-K11)                    | 3                                | K7                             | 915.4508  | 915.4522  | -1.57       | 39.50             | 39.75             | 2                 |
| 3  | [7-22]-(C1-K16)                    | 4                                |                                | 829.4060  | 829.4074  | -1.63       | 36.59             | 36.83             | 3                 |
| 4  | [23-55]-(C1-K11) <sup>6)</sup>     | 5                                | K52                            | 941.0257  | 941.0270  | -1.45       | 39.02             | -                 | -                 |
| 5  | [23-55]-(C1-K16) <sup>6)</sup>     | 6                                |                                | 879.4001  | 879.4014  | -1.42       | 37.23             | -                 | 3                 |
| 6  |                                    | 5                                |                                | 1055.0785 | 1055.0801 | -1.48       | 37.23             | -                 | 3                 |
| 7  | [128-136]-(C1-K11)                 | 3                                | K135                           | 683.0135  | 683.0146  | -1.56       | 34.11             | 34.52             | 1,2               |
| 8  |                                    | 2                                |                                | 1024.0164 | 1024.0180 | -1.51       | 34.11             | -                 | 1                 |
| 9  | [128-136]-(C1-K16)                 | 4                                |                                | 655.0781  | 655.0791  | -1.53       | 31.48             | 31.86             | 1,3               |
| 10 |                                    | 3                                |                                | 873.1015  | 873.1028  | -1.57       | 31.47             | 31.86             | 1,3               |
| 11 | [136-139]-(C1-K16)                 | 4                                | K136                           | 515.5020  | 515.5028  | -1.50       | 12.41             | 12.68             | 1,3               |
| 12 | [140-156]-(C1-K11)                 | 5                                | K148                           | 601.2984  | 601.2993  | -1.50       | 29.75             | -                 | -                 |
| 13 | [140-156]-(C1-K16)                 | 6                                |                                | 596.2940  | 596.2949  | -1.45       | 28.34             | -                 | 3                 |
| 14 | [145-156]-(C1-K11)                 | 4                                |                                | 612.3062  | 612.3071  | -1.39       | 22.63             | 23.05             | 1,2               |
| 15 |                                    | 5                                |                                | 490.0465  | 490.0472  | -1.43       | 22.63             | 23.06             | 1                 |
| 16 | [145-156]-(C1-K16)                 | 6                                |                                | 503.5840  | 503.5848  | -1.56       | 21.96             | 22.29             | 1,3               |
| 17 |                                    | 4                                |                                | 754.8722  | 754.8733  | -1.42       | 21.96             | 22.29             | 1,3               |
| 18 |                                    | 5                                |                                | 604.0993  | 604.1002  | -1.46       | 21.98             | 22.30             | 1,2,3             |
| 19 |                                    | [230-252]-(C1-K11) <sup>6)</sup> |                                | 5         | K231      | 724.7275    | 724.7285          | -1.41             | 35.68             |
| 20 | 4                                  |                                  | 905.6574                       | 905.6587  |           | -1.44       | 35.68             | -                 | 2                 |
| 21 | [230-252]-(C1-K16) <sup>6,7)</sup> | 6                                | 701.8174                       | 701.8184  |           | -1.38       | 30.13             | -                 | 3                 |
| 22 | [230-252]-(C1-K16) <sup>6)</sup>   | 5                                | 838.7803                       | 838.7815  |           | -1.43       | 33.62             | 33.78             | 3                 |

|           |                                  |   |      |           |           |       |       |       |     |
|-----------|----------------------------------|---|------|-----------|-----------|-------|-------|-------|-----|
| <b>23</b> | [230-261]-(C1-K11) <sup>6)</sup> | 6 |      | 775.0263  | 775.0274  | -1.46 | 43.39 | -     | 2   |
| <b>24</b> |                                  | 5 |      | 929.8300  | 929.8314  | -1.46 | 43.37 | -     | 2   |
| <b>25</b> | [230-261]-(C1-K16) <sup>6)</sup> | 6 |      | 870.0703  | 870.0716  | -1.48 | 41.44 | -     | 2,3 |
| <b>26</b> |                                  | 7 |      | 745.9185  | 745.9196  | -1.49 | 41.44 | -     | 3   |
| <b>27</b> | [300-304]-(C1-K11)               | 3 | K302 | 524.5911  | 524.5919  | -1.40 | 12.47 | 12.88 | 1   |
| <b>28</b> | [300-304]-(C1-K16)               | 4 |      | 536.2612  | 536.2620  | -1.59 | 13.72 | 14.09 | 1,3 |
| <b>29</b> |                                  | 3 |      | 714.6791  | 714.6801  | -1.45 | 13.72 | 14.09 | 1,3 |
| <b>30</b> | [340-358]-(C1-K11)               | 3 | K353 | 1063.8345 | 1063.8360 | -1.41 | 54.31 | -     | 2   |
| <b>31</b> |                                  | 4 |      | 798.1278  | 798.1290  | -1.44 | 54.31 | -     | 2   |
| <b>32</b> | [340-358]-(C1-K16) <sup>7)</sup> | 4 |      | 944.6925  | 944.6939  | -1.48 | 52.26 | 53.55 | 3   |
| <b>33</b> | [340-358]-(C1-K16)               | 4 |      | 940.6938  | 940.6952  | -1.46 | 53.87 | -     | 2,3 |
| <b>34</b> |                                  | 3 |      | 1253.9225 | 1253.9243 | -1.44 | 53.86 | -     | 3   |
| <b>35</b> |                                  | 5 |      | 752.7566  | 752.7577  | -1.46 | 53.90 | -     | 3   |
| <b>36</b> | [400-414]-(C1-K11)               | 5 | K409 | 546.4802  | 546.4810  | -1.54 | 20.55 | 20.72 | -   |
| <b>37</b> | [400-427]-(C1-K16)               | 7 |      | 659.6343  | 659.6353  | -1.54 | 31.59 | 31.80 | 3   |
| <b>38</b> |                                  | 6 |      | 769.4054  | 769.4066  | -1.52 | 31.59 | 31.78 | 3   |
| <b>39</b> | [407-427]-(C1-K11)               | 5 |      | 642.7381  | 642.7390  | -1.46 | 33.99 | 34.20 | -   |
| <b>40</b> | [407-427]-(C1-K16)               | 6 |      | 630.8270  | 630.8280  | -1.56 | 32.25 | 32.46 | 3   |
| <b>41</b> | [410-427]-(C1-K11)               | 4 | K414 | 729.1246  | 729.1257  | -1.44 | 38.01 | 38.20 | 2   |
| <b>42</b> | [410-427]-(C1-K16)               | 5 |      | 697.5540  | 697.5551  | -1.52 | 35.59 | 35.80 | 3   |
| <b>43</b> |                                  | 4 |      | 871.6906  | 871.6919  | -1.46 | 35.60 | 35.80 | 3   |
| <b>44</b> | [428-442]-(C1-K11)               | 3 | K428 | 922.1108  | 922.1122  | -1.52 | 36.57 | 36.85 | 2   |
| <b>45</b> | [428-442]-(C1-K16)               | 4 |      | 834.4010  | 834.4023  | -1.59 | 34.01 | 34.32 | 3   |
| <b>46</b> | [443-447]-(C1-K11)               | 3 | K443 | 544.5922  | 544.5930  | -1.35 | 15.62 | 16.10 | 1   |
| <b>47</b> | [443-447]-(C1-K16) <sup>7)</sup> | 4 |      | 555.2608  | 555.2616  | -1.49 | 13.45 | 13.67 | 3   |
| <b>48</b> |                                  | 4 |      | 551.2621  | 551.2629  | -1.45 | 16.19 | 16.60 | 1,3 |
| <b>49</b> | [443-452]-(C1-K16)               | 4 |      | 713.3335  | 713.3346  | -1.51 | 28.34 | 28.63 | 3   |

|           |                                    |   |       |           |           |          |       |       |     |
|-----------|------------------------------------|---|-------|-----------|-----------|----------|-------|-------|-----|
| <b>50</b> | [448-469]-(C1-K16)                 | 5 | K452  | 812.9870  | 812.9882  | -1.45    | 36.41 | 36.58 | 2,3 |
| <b>51</b> |                                    | 4 |       | 1015.9818 | 1015.9833 | -1.45    | 36.41 | 36.58 | 2,3 |
| <b>52</b> | [448-469]-(C1-K11)                 | 4 |       | 873.4158  | 873.4171  | -1.43    | 38.13 | 38.66 | 2   |
| <b>53</b> | [470-478]-(C1-K16) <sup>6)</sup>   | 5 | K476  | 537.2527  | 537.2535  | -1.45    | 15.85 | 16.20 | 2,3 |
| <b>54</b> |                                    | 4 |       | 671.3140  | 671.3149  | -1.34    | 15.85 | 16.19 | 3   |
| <b>55</b> | [652-656]-(C1-K16)                 | 4 | K653  | 538.2597  | 538.2605  | -1.49    | 16.06 | -     | 1,3 |
| <b>56</b> | [666-682]-(C1-K11)                 | 3 | K669  | 977.1421  | 977.1436  | -1.54    | 44.75 | 44.94 | 2   |
| <b>57</b> | [703-728]-(C1-K16)                 | 5 | K722  | 948.6266  | 948.6279  | -1.43    | 51.88 | -     | 3   |
| <b>58</b> |                                    | 6 |       | 790.6901  | 790.6913  | -1.48    | 51.88 | -     | 3   |
| <b>59</b> | [769-776]-(C1-K16)                 | 4 | K771  | 659.8017  | 659.8027  | -1.44    | 31.36 | -     | 3   |
| <b>60</b> | [769-776]-(C1-K11)                 | 3 |       | 689.3117  | 689.3126  | -1.31    | 34.22 | -     | -   |
| <b>61</b> | [826-835]-(C1-K11)                 | 4 | K829  | 525.9931  | 525.9938  | -1.43    | 34.11 | -     | -   |
| <b>62</b> | [917-931]-(C1-K11)                 | 4 | K917  | 705.3338  | 705.3348  | -1.42    | 44.32 | 44.50 | 2   |
| <b>63</b> |                                    | 3 |       | 940.1092  | 940.1105  | -1.35    | 44.29 | -     | -   |
| <b>64</b> | [917-931]-(C1-K16)                 | 5 |       | 678.5214  | 678.5224  | -1.44    | 41.22 | 41.38 | 3   |
| <b>65</b> |                                    | 4 |       | 847.8998  | 847.9010  | -1.44    | 41.22 | 41.38 | 3   |
| <b>66</b> | [1046-1062]-(C1-K11)               | 4 |       | K1060     | 787.3945  | 787.3956 | -1.46 | 50.13 | -   |
| <b>67</b> | [1063-1077]-(C1-K11) <sup>6)</sup> | 3 | K1064 | 884.4082  | 884.4094  | -1.39    | 30.62 | 30.92 | -   |
| <b>68</b> | [1063-1077]-(C1-K16) <sup>6)</sup> | 4 |       | 806.1241  | 806.1252  | -1.43    | 28.60 | 28.89 | 3   |
| <b>69</b> | [1078-1096]-(C1-K11)               | 3 | K1078 | 1046.8424 | 1046.8440 | -1.53    | 47.37 | 47.55 | -   |
| <b>70</b> |                                    | 4 |       | 785.3838  | 785.3850  | -1.46    | 47.39 | 47.55 | -   |
| <b>71</b> | [1078-1096]-(C1-K16)               | 4 |       | 927.9497  | 927.9512  | -1.59    | 44.07 | 44.26 | 3   |
| <b>72</b> |                                    | 3 |       | 1236.9304 | 1236.9323 | -1.54    | 44.08 | 44.26 | 3   |
| <b>73</b> | [1078-1103]-(C1-K11)               | 5 |       | 798.9932  | 798.9944  | -1.45    | 45.85 | 45.97 | -   |
| <b>74</b> |                                    | 4 |       | 998.4895  | 998.4910  | -1.50    | 45.86 | 45.97 | -   |
| <b>75</b> | [1078-1103]-(C1-K16)               | 6 |       | 761.0396  | 761.0408  | -1.51    | 43.49 | 43.64 | 3   |
| <b>76</b> |                                    | 5 |       | 913.0460  | 913.0474  | -1.47    | 43.49 | 43.64 | 3   |

|            |                                    |   |       |           |           |       |       |       |     |
|------------|------------------------------------|---|-------|-----------|-----------|-------|-------|-------|-----|
| <b>77</b>  | [1261-1264]-(C1-K16)               | 3 | K1261 | 700.0158  | 700.0169  | -1.52 | 16.46 | 16.89 | 1,3 |
| <b>78</b>  | [1276-1292]-(C1-K11)               | 3 | K1283 | 983.8296  | 983.8311  | -1.56 | 45.72 | 45.85 | -   |
| <b>79</b>  | [1276-1292]-(C1-K16)               | 4 |       | 880.6902  | 880.6915  | -1.50 | 42.71 | -     | 3   |
| <b>80</b>  |                                    | 3 |       | 1173.9176 | 1173.9194 | -1.56 | 42.71 | -     | 3   |
| <b>81</b>  | [1284-1296]-(C1-K11)               | 4 | K1292 | 626.5559  | 626.5568  | -1.44 | 32.61 | 32.95 | -   |
| <b>82</b>  | [1336-1366]-(C1-K16)               | 4 | K1349 | 1261.0936 | 1261.0956 | -1.55 | 54.08 | 54.35 | 2,3 |
| <b>83</b>  |                                    | 5 |       | 1009.0765 | 1009.0780 | -1.49 | 54.08 | 54.35 | 2,3 |
| <b>84</b>  | [1436-1461]-(C1-K11)               | 4 | K1437 | 1003.4827 | 1003.4842 | -1.47 | 53.82 | -     | 2   |
| <b>85</b>  | [1436-1461]-(C1-K16)               | 5 |       | 917.0405  | 917.0419  | -1.50 | 53.41 | -     | 2,3 |
| <b>86</b>  |                                    | 7 |       | 655.3169  | 655.3179  | -1.46 | 53.42 | -     | 3   |
| <b>87</b>  | [1472-1488]-(C1-K11) <sup>6)</sup> | 6 | K1474 | 524.4108  | 524.4116  | -1.40 | 27.59 | -     | -   |
| <b>88</b>  | [1474-1488]-(C1-K11) <sup>6)</sup> | 5 |       | 565.2586  | 565.2594  | -1.42 | 27.47 | -     | -   |
| <b>89</b>  | [1475-1488]-(C1-K11) <sup>6)</sup> | 3 | K1475 | 898.7276  | 898.7288  | -1.37 | 27.70 | 28.00 | -   |
| <b>90</b>  | [1489-1507]-(C1-K11)               | 3 | K1489 | 1057.5118 | 1057.5134 | -1.48 | 41.89 | 42.10 | -   |
| <b>91</b>  | [1489-1507]-(C1-K16) <sup>7)</sup> | 4 |       | 939.9506  | 939.9520  | -1.52 | 35.00 | 35.25 | 3   |
| <b>92</b>  | [1489-1507]-(C1-K16)               | 4 |       | 935.9518  | 935.9533  | -1.60 | 38.94 | 39.14 | 3   |
| <b>93</b>  | [1490-1520]-(C1-K11)               | 5 | K1507 | 932.2344  | 932.2357  | -1.39 | 46.37 | 46.47 | -   |
| <b>94</b>  | [1490-1520]-(C1-K16)               | 5 |       | 1046.2872 | 1046.2887 | -1.43 | 44.37 | -     | 3   |
| <b>95</b>  | [1523-1545]-(C1-K11)               | 3 | K1537 | 1289.9537 | 1289.9556 | -1.45 | 49.31 | -     | -   |
| <b>96</b>  |                                    | 4 |       | 967.7172  | 967.7186  | -1.47 | 49.31 | -     | -   |
| <b>97</b>  | [1523-1545]-(C1-K16)               | 5 |       | 888.4281  | 888.4294  | -1.51 | 46.95 | -     | 3   |
| <b>98</b>  |                                    | 4 |       | 1110.2832 | 1110.2848 | -1.49 | 46.96 | -     | 3   |
| <b>99</b>  | [1603-1614]-(C1-K11)               | 4 | K1605 | 609.0608  | 609.0617  | -1.52 | 41.23 | 41.50 | 1   |
| <b>100</b> | [1603-1614]-(C1-K16)               | 5 |       | 601.5030  | 601.5039  | -1.53 | 38.38 | 38.60 | 3   |
| <b>101</b> | [1606-1627]-(C1-K16)               | 5 | K1614 | 790.3970  | 790.3982  | -1.54 | 53.89 | -     | 3   |
| <b>102</b> |                                    | 4 |       | 987.7443  | 987.7459  | -1.54 | 53.88 | -     | 3   |
| <b>103</b> |                                    | 6 |       | 658.8321  | 658.8331  | -1.59 | 53.90 | -     | 3   |

|            |                                    |   |       |           |           |          |       |       |       |
|------------|------------------------------------|---|-------|-----------|-----------|----------|-------|-------|-------|
| <b>104</b> | [1615-1631]-(C1-K11)               | 4 | K1627 | 709.3612  | 709.3623  | -1.52    | 46.17 | 46.32 | -     |
| <b>105</b> | [1671-1681]-(C1-K11)               | 3 | K1671 | 744.7100  | 744.7112  | -1.61    | 29.75 | -     | -     |
| <b>106</b> | [1671-1681]-(C1-K16)               | 4 |       | 701.3504  | 701.3516  | -1.68    | 27.81 | 28.12 | 3     |
| <b>107</b> | [1672-1685]-(C1-K16)               | 5 | K1681 | 646.3253  | 646.3263  | -1.58    | 41.40 | -     | 3     |
| <b>108</b> |                                    | 4 |       | 807.6547  | 807.6559  | -1.55    | 41.41 | -     | 3     |
| <b>109</b> |                                    | 3 |       | 1076.5370 | 1076.5387 | -1.55    | 41.41 | -     | 3     |
| <b>110</b> | [1672-1685]-(C1-K11)               | 4 |       | 665.0887  | 665.0897  | -1.54    | 40.05 | -     | 2     |
| <b>111</b> |                                    | 3 |       | 886.4490  | 886.4504  | -1.54    | 44.51 | -     | -     |
| <b>112</b> | [1686-1689]-(C1-K16)               | 4 |       | K1686     | 507.5108  | 507.5116 | -1.58 | 16.15 | 16.56 |
| <b>113</b> | [1738-1749]-(C1-K11)               | 3 | K1748 | 832.7436  | 832.7449  | -1.56    | 38.93 | 39.33 | -     |
| <b>114</b> | [1738-1749]-(C1-K16)               | 4 |       | 767.3757  | 767.3768  | -1.50    | 36.02 | 36.27 | 2,3   |
| <b>115</b> |                                    | 3 |       | 1022.8316 | 1022.8332 | -1.56    | 36.02 | 36.27 | 3     |
| <b>116</b> | [1764-1792]-(C1-K16)               | 6 | K1784 | 826.2419  | 826.2432  | -1.57    | 53.57 | -     | 3     |
| <b>117</b> |                                    | 5 |       | 991.2888  | 991.2903  | -1.49    | 53.57 | -     | 3     |
| <b>118</b> | [1785-1806]-(C1-K16)               | 4 | K1792 | 1016.7379 | 1016.7395 | -1.55    | 49.56 | -     | 3     |
| <b>119</b> | [1898-1912]-(C1-K11) <sup>6)</sup> | 4 | K1902 | 664.8119  | 664.8129  | -1.43    | 26.51 | 26.75 | 1     |
| <b>120</b> |                                    | 3 |       | 886.0799  | 886.0812  | -1.47    | 26.52 | 26.75 | -     |
| <b>121</b> | [1898-1912]-(C1-K16) <sup>6)</sup> | 5 |       | 646.1039  | 646.1048  | -1.42    | 25.14 | 25.40 | 1,3   |
| <b>122</b> |                                    | 4 |       | 807.3779  | 807.3791  | -1.46    | 25.14 | 25.40 | 1,3   |
| <b>123</b> | [1913-1928]-(C1-K16)               | 4 | K1916 | 848.6612  | 848.6625  | -1.56    | 44.13 | 44.35 | 3     |
| <b>124</b> | [1917-1929]-(C1-K11)               | 3 | K1928 | 842.0720  | 842.0732  | -1.46    | 39.34 | 39.60 | -     |
| <b>125</b> | [1917-1929]-(C1-K16)               | 3 |       | 1032.1600 | 1032.1616 | -1.52    | 36.62 | -     | 3     |
| <b>126</b> |                                    | 4 |       | 774.3720  | 774.3731  | -1.45    | 36.35 | 36.62 | 3     |
| <b>127</b> | [1929-1944]-(C1-K11)               | 5 | K1935 | 611.4816  | 611.4824  | -1.37    | 28.19 | 28.50 | -     |
| <b>128</b> |                                    | 4 |       | 764.1000  | 764.1011  | -1.44    | 28.16 | 28.50 | -     |
| <b>129</b> | [1929-1944]-(C1-K16)               | 6 |       | 604.7800  | 604.7808  | -1.35    | 26.90 | 27.22 | 3     |
| <b>130</b> | [1930-1944]-(C1-K11)               | 4 |       | 725.0748  | 725.0758  | -1.41    | 31.07 | 31.38 | 2     |



|            |                                    |   |           |           |           |           |       |       |       |     |
|------------|------------------------------------|---|-----------|-----------|-----------|-----------|-------|-------|-------|-----|
| <b>131</b> | [1930-1944]-(C1-K16)               | 4 |           | 867.6408  | 867.6420  | -1.44     | 29.29 | 29.59 | 3     |     |
| <b>132</b> |                                    | 5 |           | 694.3142  | 694.3152  | -1.44     | 29.30 | 29.59 | 3     |     |
| <b>133</b> | [1945-1974]-(C1-K16)               | 5 | K1967     | 1022.4710 | 1022.4725 | -1.51     | 53.76 | -     | 3     |     |
| <b>134</b> | [1945-1974]-(C1-K11)               | 4 |           | 1135.2709 | 1135.2725 | -1.41     | 54.04 | -     | -     |     |
| <b>135</b> | [2023-2030]-(C1-K11)               | 3 | K2025     | 681.0062  | 681.0073  | -1.62     | 29.13 | 29.55 | 1,2   |     |
| <b>136</b> | [2023-2030]-(C1-K16)               | 4 |           | 653.5726  | 653.5737  | -1.61     | 27.30 | 27.64 | 1,3   |     |
| <b>137</b> | [2026-2033]-(C1-K11)               | 3 | K2030     | 660.3344  | 660.3354  | -1.51     | 30.26 | 30.60 | 1     |     |
| <b>138</b> | [2026-2033]-(C1-K16)               | 4 |           | 638.0687  | 638.0698  | -1.65     | 28.19 | 28.50 | 1,3   |     |
| <b>139</b> | [2031-2036]-(C1-K16)               | 4 | K2033     | 576.5302  | 576.5311  | -1.56     | 21.06 | 21.33 | 1,3   |     |
| <b>140</b> | [2034-2038]-(C1-K16)               | 3 | K2036     | 744.0239  | 744.0250  | -1.52     | 21.96 | 22.32 | 1,3   |     |
| <b>141</b> |                                    | 4 |           | 558.2699  | 558.2708  | -1.48     | 21.96 | 22.32 | 1,3   |     |
| <b>142</b> | [2037-2050]-(C1-K16)               | 5 | K2046     | 664.1379  | 664.1389  | -1.54     | 35.32 | 35.55 | 3     |     |
| <b>143</b> | [2039-2050]-(C1-K11)               | 4 |           | 620.0582  | 620.0592  | -1.57     | 37.60 | 37.87 | -     |     |
| <b>144</b> |                                    | 3 |           | 826.4084  | 826.4096  | -1.49     | 37.60 | 37.87 | -     |     |
| <b>145</b> | [2039-2050]-(C1-K16)               | 4 |           | 762.6242  | 762.6254  | -1.57     | 34.90 | 35.16 | 3     |     |
| <b>146</b> |                                    | 5 |           | 610.3009  | 610.3019  | -1.61     | 34.90 | 35.17 | 1,3   |     |
| <b>147</b> | [2097-2106]-(C1-K16) <sup>7)</sup> | 3 |           | K2102     | 892.4294  | 892.4308  | -1.53 | 28.32 | 28.68 | 2,3 |
| <b>148</b> |                                    | 4 | 669.5740  |           | 669.5750  | -1.53     | 28.32 | 28.68 | 3     |     |
| <b>149</b> | [2097-2106]-(C1-K16)               | 4 | 665.5753  |           | 665.5763  | -1.50     | 35.21 | 35.57 | 1,2,3 |     |
| <b>150</b> |                                    | 3 | 887.0978  |           | 887.0991  | -1.50     | 35.20 | 35.58 | 1,2,3 |     |
| <b>151</b> | [2097-2106]-(C1-K11) <sup>7)</sup> | 3 | 702.3414  |           | 702.3425  | -1.52     | 30.32 | 30.75 | 1,2   |     |
| <b>152</b> | [2097-2106]-(C1-K11)               | 3 | 697.0098  |           | 697.0108  | -1.48     | 38.37 | 38.75 | 1,2   |     |
| <b>153</b> |                                    | 2 | 1045.0107 |           | 1045.0123 | -1.48     | 38.37 | 38.75 | 2     |     |
| <b>154</b> | [2154-2183]-(C1-K16)               | 5 | K2179     |           | 1001.4931 | 1001.4946 | -1.52 | 54.21 | -     | 3   |
| <b>155</b> | [2180-2198]-(C1-K11)               | 3 | K2183     |           | 1107.8665 | 1107.8682 | -1.47 | 54.08 | -     | 2   |
| <b>156</b> | [2180-2198]-(C1-K16)               | 4 |           |           | 973.7178  | 973.7193  | -1.51 | 53.56 | -     | 2,3 |
| <b>157</b> | [2199-2212]-(C1-K16)               | 4 | K2208     | 776.6336  | 776.6348  | -1.51     | 37.61 | 37.83 | 3     |     |

|            |                                    |   |       |           |           |       |       |       |       |
|------------|------------------------------------|---|-------|-----------|-----------|-------|-------|-------|-------|
| <b>158</b> |                                    | 3 |       | 1035.1755 | 1035.1771 | -1.55 | 37.63 | 37.83 | 3     |
| <b>159</b> | [2199-2212]-(C1-K11)               | 3 |       | 845.0875  | 845.0888  | -1.50 | 40.90 | 41.15 | -     |
| <b>160</b> | [2209-2220]-(C1-K11)               | 3 | K2212 | 800.3807  | 800.3819  | -1.46 | 28.23 | 28.55 | -     |
| <b>161</b> | [2209-2220]-(C1-K16)               | 3 |       | 990.4687  | 990.4702  | -1.48 | 26.59 | 26.90 | 1,2,3 |
| <b>162</b> |                                    | 4 |       | 743.1034  | 743.1046  | -1.58 | 26.59 | 26.90 | 1,2,3 |
| <b>163</b> | [2299-2309]-(C1-K11)               | 3 | K2308 | 790.0785  | 790.0797  | -1.48 | 48.42 | 48.60 | -     |
| <b>164</b> | [2299-2309]-(C1-K16)               | 4 |       | 735.3768  | 735.3779  | -1.53 | 44.90 | 45.10 | 3     |
| <b>165</b> | [2311-2316]-(C1-K11)               | 4 | K2311 | 457.2334  | 457.2341  | -1.53 | 10.38 | 10.99 | -     |
| <b>166</b> | [2311-2316]-(C1-K16)               | 5 |       | 480.0411  | 480.0418  | -1.50 | 12.33 | 12.52 | 1,3   |
| <b>167</b> |                                    | 4 |       | 599.7994  | 599.8004  | -1.54 | 12.33 | 12.52 | 1,3   |
| <b>168</b> | [2381-2385]-(C1-K16)               | 4 | K2381 | 547.5166  | 547.5174  | -1.46 | 12.58 | 12.90 | 1,3   |
| <b>169</b> | [2408-2433]-(C1-K11)<br>6,7)       | 5 | K2425 | 797.1534  | 797.1545  | -1.41 | 45.03 | -     | -     |
| <b>170</b> | [2408-2433]-(C1-K11) <sup>6)</sup> | 5 |       | 793.9544  | 793.9556  | -1.44 | 48.44 | -     | -     |
| <b>171</b> |                                    | 4 |       | 992.1911  | 992.1925  | -1.39 | 48.45 | -     | -     |
| <b>172</b> | [2408-2433]-(C1-K16) <sup>6)</sup> | 5 |       | 908.0072  | 908.0085  | -1.45 | 46.00 | -     | 3     |
| <b>173</b> |                                    | 6 |       | 756.8407  | 756.8417  | -1.37 | 46.04 | -     | 3     |
| <b>174</b> | [2434-2444]-(C1-K11)               | 3 | K2436 | 780.0540  | 780.0552  | -1.54 | 42.71 | 42.93 | 2     |
| <b>175</b> | [2434-2444]-(C1-K16)               | 4 |       | 727.8585  | 727.8596  | -1.48 | 39.39 | 39.60 | 1,2,3 |
| <b>176</b> |                                    | 3 |       | 970.1420  | 970.1435  | -1.55 | 39.38 | 39.60 | 3     |
| <b>177</b> | [2437-2463]-(C1-K16)               | 4 | K2444 | 1170.0654 | 1170.0673 | -1.58 | 53.83 | -     | 2,3   |
| <b>178</b> | [2508-2522]-(C1-K11)               | 3 | K2508 | 891.7755  | 891.7769  | -1.61 | 41.67 | 41.93 | 2     |
| <b>179</b> | [2508-2522]-(C1-K16)               | 4 |       | 811.6496  | 811.6509  | -1.57 | 38.76 | 39.00 | 2,3   |
| <b>180</b> |                                    | 3 |       | 1081.8635 | 1081.8652 | -1.60 | 38.78 | -     | 3     |
| <b>181</b> | [262-274]-(C1-K16)                 | 5 | K265  | 612.8805  | 612.8814  | -1.37 | 23.32 | 23.58 | 3     |
| <b>182</b> |                                    | 4 |       | 765.8486  | 765.8497  | -1.47 | 23.32 | 23.58 | 3     |
| <b>183</b> | [262-274]-(C1-K11)                 | 4 |       | 623.2826  | 623.2835  | -1.44 | 24.35 | 24.73 | 1,2   |
| <b>184</b> |                                    | 3 |       | 830.7076  | 830.7087  | -1.36 | 24.35 | 24.73 | -     |

|            |                                    |   |          |          |          |       |       |       |     |
|------------|------------------------------------|---|----------|----------|----------|-------|-------|-------|-----|
| <b>185</b> | [2721-2739]-(C1-K16) <sup>6)</sup> | 5 | K2735    | 760.3726 | 760.3738 | -1.55 | 36.80 | 36.95 | 3   |
| <b>186</b> | [2721-2739]-(C1-K11) <sup>6)</sup> | 4 |          | 807.6478 | 807.6491 | -1.55 | 39.06 | 39.23 | -   |
| <b>187</b> | [2736-2745]-(C1-K11)               | 3 | K2739    | 729.3595 | 729.3607 | -1.55 | 29.25 | 29.65 | 2   |
| <b>188</b> | [2736-2745]-(C1-K16)               | 4 |          | 689.8376 | 689.8386 | -1.52 | 27.30 | 27.60 | 2,3 |
| <b>189</b> |                                    | 3 | 919.4475 | 919.4489 | -1.56    | 27.30 | 27.60 | 3     |     |
| <b>190</b> | [2791-2795]-(C1-K11)               | 4 | K2792    | 422.4610 | 422.4616 | -1.54 | 9.62  | 9.80  | 1   |
| <b>191</b> | [2791-2795]-(C1-K16)               | 4 |          | 565.0270 | 565.0279 | -1.55 | 11.34 | 11.59 | 1,3 |
| <b>192</b> |                                    | 4 |          | 533.0034 | 533.0042 | -1.41 | 13.16 | 13.55 | 1,3 |
| <b>193</b> | [2792-2795]-(C1-K16)               | 3 |          | 710.3352 | 710.3362 | -1.50 | 13.16 | 13.55 | 1,3 |
| <b>194</b> | [2847-2854]-(C1-K11)               | 3 | K2851    | 659.6746 | 659.6757 | -1.62 | 36.71 | 37.02 | 1,2 |
| <b>195</b> |                                    | 2 |          | 989.0080 | 989.0096 | -1.62 | 36.70 | 37.02 | -   |
| <b>196</b> | [2847-2854]-(C1-K16)               | 3 |          | 849.7626 | 849.7640 | -1.61 | 33.64 | 33.96 | 3   |
| <b>197</b> |                                    | 4 |          | 637.5739 | 637.5750 | -1.61 | 33.65 | 33.95 | 1,3 |
| <b>198</b> | [2989-3006]-(C1-K16)               | 6 | K2991    | 618.4682 | 618.4691 | -1.51 | 36.38 | -     | 3   |
| <b>199</b> | [3027-3038]-(C1-K16)               | 5 | K3031    | 594.2822 | 594.2830 | -1.38 | 19.74 | 19.94 | 1,3 |
| <b>200</b> |                                    | 6 |          | 495.4031 | 495.4038 | -1.45 | 19.75 | 19.94 | 3   |
| <b>201</b> |                                    | 4 |          | 742.6008 | 742.6018 | -1.38 | 19.74 | 19.94 | 3   |
| <b>202</b> | [3129-3136]-(C1-K16)               | 5 | K3130    | 498.2515 | 498.2522 | -1.49 | 14.84 | 15.20 | 3   |
| <b>203</b> |                                    | 4 |          | 622.5624 | 622.5634 | -1.53 | 14.85 | 15.20 | 1,3 |
| <b>204</b> | [3162-3174]-(C1-K16)               | 5 | K3165    | 594.6866 | 594.6874 | -1.45 | 23.00 | 23.35 | 3   |
| <b>205</b> | [3227-3252]-(C1-K16)               | 5 | K3244    | 898.0120 | 898.0133 | -1.45 | 47.41 | -     | 3   |
| <b>206</b> | [3322-3326]-(C1-K16)               | 4 | K3325    | 546.2872 | 546.2881 | -1.60 | 20.03 | 20.35 | 1,3 |
| <b>207</b> | [3375-3394]-(C1-K16) <sup>6)</sup> | 4 | K3385    | 948.6892 | 948.6906 | -1.50 | 31.30 | 31.50 | 3   |
| <b>208</b> | [3375-3394]-(C1-K11) <sup>6)</sup> | 4 |          | 806.1232 | 806.1244 | -1.49 | 33.38 | 33.60 | 2   |

<sup>1)</sup> Numbers inside brackets and parentheses correspond to the position of the proteolytic peptide within the sequences of KLH2 and Cys<sup>1</sup>pP0, respectively.

- 2) Indicates the position where the peptide Cys<sup>1</sup>pP0 is added by the Michael addition to the free amino groups in the Lys residues or N-terminus of the KLH2.
- 3) Retention time of the first peak of type 2 peptides
- 4) Retention time of the second peak of type 2 peptides
- 5) Type 2 peptides containing the P+71 ion fragment (1), C+80 ion fragment (2), y5  $\alpha/\beta$  fragment ion ( $m/z = 589.282, 1+$ ) (3) or not containing any ion fragments (-).
- 6) Carbamidomethylation of Cys
- 7) Met  $\rightarrow$  Met sulfoxide

**Table S9.** Identification of type 2 peptides derived from the proteolytic digestion of KLH2-Cys<sup>1</sup>pP0 conjugate with trypsin using the MED-FASP method [4]. Type 2 peptides were identified using hydrolyzed thiosuccinimide linker.

|    | Assignment <sup>1)</sup>           | z | Conjugation site <sup>2)</sup> | m/z theor. | m/z exp. | Error (ppm) | RT1 <sup>3)</sup> | RT2 <sup>4)</sup> | RT3 <sup>5)</sup> | RT4 <sup>6)</sup> | Ion <sup>7)</sup> |
|----|------------------------------------|---|--------------------------------|------------|----------|-------------|-------------------|-------------------|-------------------|-------------------|-------------------|
| 1  | [128 - 136]-(C1-K11)               | 3 | (K135)                         | 689.0140   | 689.0181 | -1.60       | 30.08             | -                 | -                 | -                 | -                 |
| 2  | [128 - 136]-(C1-K16)               | 4 |                                | 659.5804   | 659.5814 | -1.59       | 24.03             | 24.28             | -                 | -                 | 5                 |
| 3  | [145 - 156]-(C1-K11)               | 4 | (K148)                         | 616.8088   | 616.8094 | -1.46       | 19.64             | 19.48             | 20.35             | 20.55             | 1,4               |
| 4  |                                    | 5 |                                | 493.6486   | 493.6493 | -1.46       | 19.64             | 19.48             | 20.36             | 20.55             | -                 |
| 5  | [145 - 156]-(C1-K16)               | 5 |                                | 604.4014   | 604.4023 | -1.48       | 19.60             | 19.43             | 20.12             | 20.32             | 1,3,6,5           |
| 6  |                                    | 6 |                                | 506.5858   | 506.5866 | -1.48       | 19.59             | 19.43             | 20.12             | 20.32             | 1,3,5             |
| 4  |                                    | 4 |                                | 459.3448   | 459.3459 | -1.48       | 19.60             | 19.43             | 20.11             | 20.31             | 1,5               |
| 8  | [262 - 244]-(C1-K11)               | 4 |                                | (K265)     | 624.4853 | 624.4861    | -1.35             | 20.88             | 20.98             | 21.65             | 21.8              |
| 9  |                                    | 5 | 502.4298                       |            | 502.4305 | -1.35       | 20.88             | 20.98             | 21.65             | 21.8              | -                 |
| 10 | [262 - 244]-(C1-K16)               | 5 | 616.4826                       |            | 616.4835 | -1.40       | 20.53             | 20.65             | 21.09             | 21.20             | 1, 5              |
| 11 |                                    | 6 | 513.9034                       |            | 513.9042 | -1.52       | 20.53             | 20.65             | 21.09             | 21.20             | 5                 |
| 12 | [300 - 304]-(C1-K16)               | 4 | (K302)                         | 540.4639   | 540.4644 | -1.48       | 9.68              | 9.80              | 10.60             | 11.04             | 1,3, 5            |
| 13 |                                    | 5 |                                | 432.8124   | 432.8133 | -1.43       | 9.68              | 9.82              | 10.60             | 11.06             | 1,3,4,5           |
| 14 | [340 - 358]-(C1-K16) <sup>8)</sup> | 5 | (K353)                         | 459.5544   | 459.5588 | -1.45       | 50.11             | -                 | -                 | -                 | 5                 |
| 15 | [340 - 358]-(C1-K16)               | 5 |                                | 456.3584   | 456.3598 | -1.48       | 52.26             | 53.50             | -                 | -                 | 2,5               |
| 16 |                                    | 4 |                                | 945.1964   | 945.1948 | -1.51       | 52.25             | -                 | -                 | -                 | 5                 |
| 14 | [443 - 444]-(C1-K16)               | 4 | (K443)                         | 555.4644   | 555.4656 | -1.53       | 12.49             | 12.63             | -                 | -                 | 1,3,5             |
| 18 |                                    | 5 |                                | 444.8133   | 444.8140 | -1.54       | 12.49             | 12.63             | 13.45             | 13.65             | 5                 |
| 19 | [448 - 469]-(C1-K11)               | 5 | (K452)                         | 402.5363   | 402.5343 | -1.45       | 35.24             | 36.52             | -                 | -                 | 2                 |
| 20 | [448 - 469]-(C1-K16)               | 5 |                                | 816.5891   | 816.5903 | -1.44       | 33.32             | 34.35             | -                 | -                 | 2,5               |
| 21 |                                    | 6 |                                | 680.6589   | 680.6599 | -1.44       | 33.33             | 34.35             | -                 | -                 | 5                 |
| 22 | [652 - 656]-(C1-K11) <sup>9)</sup> | 3 | (K653)                         | 533.2592   | 533.2600 | -1.44       | 13.15             | 13.55             | -                 | -                 | -                 |
| 23 | [652 - 656]-(C1-K16) <sup>9)</sup> | 4 |                                | 542.4623   | 542.4631 | -1.54       | 14.24             | 14.68             | -                 | -                 | 5                 |
| 24 | [652 - 656]-(C1-K16)               | 3 |                                | 423.3442   | 423.3483 | -1.44       | 14.24             | 14.68             | -                 | -                 | 5                 |
| 25 | [914 - 931]-(C1-K11)               | 4 | (K914)                         | 409.8364   | 409.8345 | -1.48       | 41.18             | 42.58             | -                 | -                 | 1                 |

|    |                                      |   |         |           |           |       |       |       |       |       |         |
|----|--------------------------------------|---|---------|-----------|-----------|-------|-------|-------|-------|-------|---------|
| 26 | [914 - 931]-(C1-K16)                 | 5 |         | 682.1235  | 682.1245  | -1.44 | 38.43 | 39.64 | -     | -     | 6,5     |
| 24 |                                      | 4 |         | 852.4024  | 852.4034  | -1.50 | 38.42 | -     | -     | -     | 6,5     |
| 28 | [1063 - 1044]-(C1-K11)               | 4 | (K1064) | 668.0604  | 668.0614  | -1.46 | 24.45 | 24.90 | -     | -     | -       |
| 29 | [1063 - 1044]-(C1-K16)               | 4 |         | 810.6264  | 810.6249  | -1.48 | 24.43 | 24.89 | 26.14 | 26.30 | 5       |
| 30 | [1063 - 1044]-(C1-K16) <sup>9)</sup> | 5 |         | 648.4029  | 648.4039  | -1.51 | 24.43 | 24.89 | 26.14 | 26.30 | 5       |
| 31 | [1048 - 1096]-(C1-K11)               | 4 |         | 489.8864  | 489.8846  | -1.52 | 45.15 | -     | -     | -     | 2       |
| 32 | [1048 - 1103]-(C1-K11)               | 5 | (K1048) | 802.5953  | 802.5965  | -1.44 | 44.34 | -     | -     | -     | 2       |
| 33 | [1048 - 1096]-(C1-K16)               | 4 |         | 932.4524  | 932.4538  | -1.53 | 40.53 | 42.03 | -     | -     | 5       |
| 34 |                                      | 5 |         | 446.1635  | 446.1646  | -1.50 | 40.53 | 42.03 | -     | -     | 5       |
| 35 |                                      | 4 |         | 655.0366  | 655.0345  | -1.46 | 40.98 | 42.11 | -     | -     | 5       |
| 36 |                                      | 6 |         | 464.0414  | 464.0425  | -1.46 | 40.98 | 42.12 | -     | -     | 5       |
| 34 | [1104 - 1130]-(C1-K11)               | 4 | (K1108) | 1062.4958 | 1062.4946 | -1.51 | 54.09 | -     | -     | -     | 2       |
| 38 | [1261 - 1264]-(C1-K11)               | 4 | (K1261) | 384.2004  | 384.2010  | -1.55 | 12.42 | 12.40 | -     | -     | 1, 3    |
| 39 | [1261 - 1264]-(C1-K16)               | 4 |         | 529.4664  | 529.4643  | -1.60 | 12.63 | 12.9  | 13.61 | 13.90 | 1,3,5   |
| 40 |                                      | 5 |         | 424.0144  | 424.0154  | -1.56 | 12.63 | 12.9  | 13.61 | 13.90 | 1,3,5   |
| 41 | [1246 - 1292]-(C1-K16)               | 4 | (K1283) | 885.1928  | 885.1942  | -1.55 | 40.19 | -     | -     | -     | 5       |
| 42 | [1284 - 1296]-(C1-K16)               | 5 | (K1292) | 619.1012  | 619.1021  | -1.45 | 24.46 | 24.58 | 28.35 | 28.50 | 6, 5    |
| 43 | [1336 - 1366]-(C1-K11) <sup>9)</sup> | 4 | (K1349) | 1123.0303 | 1123.0320 | -1.44 | 54.31 | 54.45 | 54.68 | -     | 2       |
| 44 | [1336 - 1366]-(C1-K16) <sup>9)</sup> | 5 |         | 1012.6486 | 1012.6801 | -1.50 | 54.00 | -     | -     | -     | 2, 5    |
| 45 | [1436 - 1461]-(C1-K11)               | 5 | (K1434) | 806.5898  | 806.5910  | -1.51 | 53.42 | 53.65 | 53.83 | -     | 2, 6    |
| 46 | [1436 - 1461]-(C1-K16)               | 5 |         | 920.6426  | 920.6440  | -1.52 | 51.22 | 52.44 | -     | -     | 5       |
| 44 |                                      | 6 |         | 464.3401  | 464.3413  | -1.56 | 51.26 | 52.46 | -     | -     | 5       |
| 48 |                                      | 4 |         | 654.8898  | 654.8908  | -1.52 | 51.24 | 52.46 | -     | -     | 5       |
| 49 | [1490 - 1520]-(C1-K16)               | 6 | (K1504) | 845.0454  | 845.0440  | -1.44 | 41.85 | 42.45 | 42.92 | -     | 2, 5    |
| 50 | [1523 - 1545]-(C1-K16)               | 6 | (K1534) | 443.5265  | 443.5246  | -1.48 | 44.43 | 45.64 | -     | -     | 5       |
| 51 |                                      | 5 |         | 892.0302  | 892.0316  | -1.52 | 44.42 | 45.64 | 44.44 | -     | 5       |
| 52 | [1546 - 1550]-(C1-K16)               | 4 | (K1546) | 568.0208  | 568.0216  | -1.41 | 15.68 | -     | -     | -     | 5       |
| 53 | [1642 - 1685]-(C1-K11)               | 4 | (K1681) | 669.5913  | 669.5924  | -1.61 | 41.33 | 43.04 | -     | -     | 2, 6, 4 |
| 54 |                                      | 5 |         | 535.8446  | 535.8455  | -1.60 | 41.36 | 43.04 | -     | -     | 6, 4    |
| 55 | [1642 - 1685]-(C1-K16)               | 4 |         | 812.1543  | 812.1586  | -1.60 | 38.64 | 40.13 | -     | -     | 1, 2, 5 |

|    |                                      |   |         |          |          |       |       |       |        |       |            |
|----|--------------------------------------|---|---------|----------|----------|-------|-------|-------|--------|-------|------------|
| 56 |                                      | 5 |         | 649.9244 | 649.9285 | -1.60 | 38.64 | 40.13 | -      | -     | 2, 5       |
| 54 | [1438 - 1449]-(C1-K11)               | 4 | (K1448) | 629.3123 | 629.3133 | -1.55 | 34.69 | 35.95 | -      | -     | 2, 6       |
| 58 | [1438 - 1449]-(C1-K16)               | 4 |         | 441.8483 | 441.8495 | -1.55 | 32.25 | 32.38 | 33.36  | -     | 5          |
| 59 | [1485 - 1806]-(C1-K16)               | 5 | (K1492) | 814.1940 | 814.1953 | -1.54 | 44.50 | -     | -      | -     | 2, 5       |
| 60 | [1898 - 1912]-(C1-K11)               | 4 | (K1902) | 669.3145 | 669.3155 | -1.49 | 23.01 | 23.15 | 24.20  | 24.35 | 1, 4       |
| 61 | [1898 - 1912]-(C1-K16)               | 4 |         | 811.8805 | 811.8814 | -1.51 | 21.25 | 21.45 | 22.09  | 22.20 | 5          |
| 62 | [1898 - 1912]-(C1-K16) <sup>9)</sup> | 6 |         | 541.5896 | 541.5904 | -1.51 | 23.14 | -     | -      | -     | 5          |
| 63 | [1930 - 1944]-(C1-K11)               | 5 | (K1935) | 583.8635 | 583.8643 | -1.44 | 24.24 | 24.35 | 28.25  | 28.42 | -          |
| 64 |                                      | 4 |         | 429.5444 | 429.5485 | -1.44 | 24.24 | 24.35 | 28.28  | 28.42 | -          |
| 65 | [1930 - 1944]-(C1-K16)               | 6 |         | 581.4649 | 581.4658 | -1.43 | 26.00 | 26.88 | 24.08  | -     | 5          |
| 66 |                                      | 5 |         | 694.9163 | 694.9143 | -1.46 | 26.00 | 26.15 | 26.88  | 24.08 | 5          |
| 64 | [2023 - 2030]-(C1-K11)               | 4 | (K2025) | 515.5092 | 515.5101 | -1.40 | 23.85 | 24.10 | -      | -     | -          |
| 68 | [2094 - 2106]-(C1-K11) <sup>8)</sup> | 3 | (K2102) | 403.0133 | 403.0143 | -1.52 | 32.25 | 32.4  | 34.03  | 34.24 | 1, 2, 6, 4 |
| 69 | [2094 - 2106]-(C1-K11)               | 3 |         | 408.3449 | 408.3460 | -1.55 | 25.00 | 25.25 | 26.24  | 26.49 | 2,         |
| 40 |                                      | 4 |         | 524.5119 | 524.5124 | -1.56 | 32.21 | 32.41 | 34.03  | 34.24 | 6          |
| 41 | [2094 - 2106]-(C1-K16) <sup>8)</sup> | 4 |         | 644.0466 | 644.0444 | -1.59 | 23.45 | 23.95 | 24.80  | 25.05 | 5          |
| 42 |                                      | 5 |         | 539.4629 | 539.4634 | -1.48 | 23.49 | 23.95 | 24.80  | 25.10 | 6, 5       |
| 43 |                                      | 4 |         | 640.0449 | 640.0490 | -1.54 | 29.96 | 30.15 | 31.483 | 31.40 | 1, 2, 5    |
| 44 | [2094 - 2106]-(C1-K16)               | 3 |         | 893.1013 | 893.1024 | -1.53 | 29.96 | 30.15 | 31.483 | 31.40 | 1, 2, 5    |
| 45 |                                      | 5 |         | 536.2639 | 536.2644 | -1.53 | 29.96 | 30.15 | 31.483 | 31.40 | 5          |
| 46 | [2209 - 2220]-(C1-K11)               | 4 | (K2212) | 605.0401 | 605.0410 | -1.49 | 23.45 | 23.95 | 25.14  | 25.30 | 5          |
| 44 | [2209 - 2220]-(C1-K16)               | 5 |         | 598.2864 | 598.2844 | -1.54 | 22.44 | 22.9  | 23.48  | 23.94 | 6,5        |
| 48 |                                      | 4 |         | 444.6061 | 444.6042 | -1.50 | 22.44 | 22.9  | 23.48  | 23.94 | 5          |
| 49 | [2381 - 2385]-(C1-K16)               | 4 | (K2381) | 552.0192 | 552.0200 | -1.54 | 9.39  | 9.48  | 9.65   | 9.45  | 1, 3, 5    |
| 80 | [2434 - 2444]-(C1-K16)               | 4 | (K2436) | 432.3611 | 432.3622 | -1.54 | 36.43 | -     | -      | -     | 5          |
| 81 |                                      | 5 |         | 586.0904 | 586.0914 | -1.60 | 36.45 | -     | -      | -     | 5          |
| 82 | [2508 - 2522]-(C1-K16)               | 5 | (K2508) | 653.1233 | 653.1244 | -1.65 | 36.55 | -     | -      | -     | 5          |
| 83 | [2436 - 2445]-(C1-K11)               | 4 | (K2439) | 551.4442 | 551.4451 | -1.59 | 23.46 | 23.95 | 25.43  | 25.65 | 5          |
| 84 | [2492 - 2495]-(C1-K16)               | 5 | (K2492) | 430.2063 | 430.2040 | -1.63 | 9.58  | 9.64  | 10.00  | 10.30 | 1, 3, 6,5  |
| 85 | [2844 - 2854]-(C1-K11)               | 3 | (K2851) | 665.6481 | 665.6492 | -1.65 | 32.21 | 34.03 | -      | -     | 1          |

|           |                        |   |          |          |       |       |       |   |   |      |
|-----------|------------------------|---|----------|----------|-------|-------|-------|---|---|------|
| <b>86</b> |                        | 4 | 499.5105 | 499.5114 | -1.40 | 32.24 | 34.02 | - | - | -    |
| <b>84</b> | [2844 - 2854]-(C1-K16) | 5 | 513.8628 | 513.8634 | -1.60 | 29.92 | 31.40 | - | - | 5    |
| <b>88</b> |                        | 4 | 642.0465 | 642.0446 | -1.64 | 29.89 | 31.39 | - | - | 1, 5 |

- 1) Numbers inside brackets and parentheses correspond to the position of the proteolytic peptide within the sequences of KLH2 and Cys<sup>1</sup>pP0, respectively.
- 2) Indicates the position where the peptide Cys<sup>1</sup>pP0 is added by the Michael addition to the free amino groups in the Lys residues or N-terminus of the KLH2.
- 3) Retention time of the first peak of type 2 peptides
- 4) Retention time of the second peak of type 2 peptides
- 5) Retention time of the third peak of type 2 peptides
- 6) Retention time of the fourth peak of type 2 peptides
- 7) Type 2 peptides containing the P+71 ion fragment (1), C+98 ion fragment (2), P+203 ion fragment (3), backbone fragment ions  $*(\alpha/\beta)b_n/*(\alpha/\beta)y_n$  generated from P+71 ion (4), backbone fragment ions  $*(\alpha/\beta)b_n/*(\alpha/\beta)y_n$  generated from C+98 ion (5), y5  $\alpha/\beta$  fragment ion (m/z = 589.282, 1+) (6) or not containing any ion fragments (-).
- 8) Met → Met sulfoxide
- 9) Carbamidomethylation of Cys



**Table S10.** Amino acid changes detected in KLH1 using the Peaks software [5].

| #      | Assignment <sup>i)</sup> | Amino acid change                                  | m/z exp   | z | error (ppm) |
|--------|--------------------------|----------------------------------------------------|-----------|---|-------------|
| 1      | [84-117]                 | Leu <sup>89</sup> →Met                             | 1279.2992 | 3 | 2.2         |
| 1      | [84-117] <sup>i)</sup>   | Leu <sup>89</sup> →Met                             | 963.7238  | 4 | 1.0         |
| 1      | [86-117]                 | Leu <sup>89</sup> →Met                             | 1175.2340 | 3 | 4.2         |
| 2      | [190-215]                | Glu <sup>198</sup> →Gln                            | 789.3654  | 4 | -2.5        |
| 3      | [190-215]                | Asp <sup>191</sup> →Val                            | 1047.1602 | 3 | -2.3        |
| 4 y 5  | [451-462]                | Ala <sup>459</sup> →Val, Tyr <sup>461</sup> →Phe   | 676.8098  | 2 | 0.4         |
| 6      | [760-767]                | Ser <sup>766</sup> →Ala                            | 381.7296  | 2 | 1.4         |
| 7      | [907-916]                | Leu <sup>916</sup> →Arg                            | 565.8121  | 2 | 0.4         |
| 8      | [956-969]                | Trp <sup>959</sup> →Ser                            | 527.9172  | 3 | 5.0         |
| 9      | [1079-1097]              | Glu <sup>1079</sup> →Gln                           | 694.0261  | 3 | -8.9        |
| 10, 11 | [1605-1612]              | Leu <sup>1605</sup> →Tyr, Lys <sup>1609</sup> →Ser | 455.7479  | 2 | 0.5         |
| 12     | [1764-1774]              | Thr <sup>1774</sup> →Arg                           | 622.3472  | 2 | -1.6        |
| 13     | [1764-1782]              | Glu <sup>1768</sup> →Gln                           | 698.3643  | 3 | -4.4        |
| 14     | [1845-1857]              | Ile <sup>1845</sup> →Gln                           | 484.2420  | 3 | 7.2         |
| 15     | [1858-1883]              | Glu <sup>1858</sup> →Gln                           | 779.6208  | 4 | -6.2        |
| 16     | [1915-1942]              | Ser <sup>1917</sup> →Val                           | 833.1284  | 4 | -7.6        |
| 17     | [2101-2127]              | Ala <sup>2117</sup> →Val                           | 913.1328  | 3 | 0.3         |
| 18     | [2101-2127]              | Asp <sup>2109</sup> →Asn                           | 903.4582  | 3 | -2.9        |
| 19     | [2105-2127]              | Ala <sup>2117</sup> →Val                           | 768.3929  | 3 | -1.0        |
| 20     | [2152-2162]              | Arg <sup>2162</sup> →Lys                           | 677.3751  | 2 | 1.2         |
| 21     | [2178-2189]              | His <sup>2184</sup> →Asp                           | 470.5863  | 3 | 1.5         |
| 22, 23 | [2271-2290]              | Ser <sup>2274</sup> →Ala, Ile <sup>2286</sup> →Ala | 777.0494  | 3 | 2.1         |
| 22, 23 | [2271-2291]              | Ser <sup>2274</sup> →Ala, Ile <sup>2286</sup> →Ala | 822.7377  | 3 | 4.4         |
| 24     | [2274-2296]              | Asp <sup>2284</sup> →Asn                           | 542.6719  | 5 | -5.8        |
| 25     | [2276-2296]              | Ile <sup>2286</sup> →Ala                           | 617.7957  | 4 | -2.5        |
| 25     | [2276-2291]              | Ile <sup>2286</sup> →Ala                           | 631.2957  | 3 | -1.9        |
| 25     | [2276-2296]              | Ile <sup>2286</sup> →Ala                           | 617.7974  | 4 | 0.4         |
| 25     | [2277-2296]              | Ile <sup>2286</sup> →Ala                           | 596.0397  | 4 | 0.9         |
| 25     | [2277-2291]              | Ile <sup>2286</sup> →Ala                           | 902.9265  | 2 | 0.9         |
| 25     | [2277-2296]              | Ile <sup>2286</sup> →Ala                           | 1191.0726 | 2 | 1.3         |
| 25     | [2278-2291]              | Ile <sup>2286</sup> →Ala                           | 430.2085  | 4 | 0.1         |
| 25     | [2278-2296]              | Ile <sup>2286</sup> →Ala                           | 459.6284  | 5 | 4.5         |
| 26     | [2318-2340]              | Tyr <sup>2331</sup> →His                           | 695.8424  | 4 | -1.1        |
| 26     | [2321-2340]              | Tyr <sup>2331</sup> →His                           | 631.5591  | 4 | 0.5         |
| 26     | [2325-2340]              | Tyr <sup>2331</sup> →His                           | 513.2506  | 4 | -0.9        |
| 26     | [2326-2340]              | Tyr <sup>2331</sup> →His                           | 645.9855  | 3 | 1.2         |

|                       |                           |                                                                                                           |          |   |      |
|-----------------------|---------------------------|-----------------------------------------------------------------------------------------------------------|----------|---|------|
| <b>26</b>             | [2326-2340]               | Tyr <sup>2331</sup> →His                                                                                  | 645.9855 | 3 | 1.2  |
| <b>26</b>             | [2328-2340]               | Tyr <sup>2331</sup> →His                                                                                  | 412.9547 | 4 | -0.7 |
| <b>26</b>             | [2330-2340]               | Tyr <sup>2331</sup> →His                                                                                  | 468.8961 | 3 | -2.1 |
| <b>26</b>             | [2330-2340]               | Tyr <sup>2331</sup> →His                                                                                  | 468.8969 | 3 | -0.5 |
| <b>26</b>             | [2331-2340]               | Tyr <sup>2331</sup> →His                                                                                  | 634.3090 | 2 | -5.5 |
| <b>27</b>             | [2576-2587]               | Gln <sup>2576</sup> →Lys                                                                                  | 650.3290 | 2 | 2.6  |
| <b>28</b>             | [2576-2633] <sup>i)</sup> | Gly <sup>2595</sup> →Trp                                                                                  | 827.6458 | 8 | -0.2 |
| <b>29, 30, 31, 32</b> | [2790-2804]               | Glu <sup>2790</sup> →Ser, Glu <sup>2791</sup> →His,<br>Thr <sup>2794</sup> →Val, Ala <sup>2797</sup> →Gly | 424.9880 | 4 | 1.3  |
| <b>33</b>             | [2843-2852]               | Arg <sup>2844</sup> →His                                                                                  | 632.3389 | 2 | -2.1 |

<sup>1)</sup> Numbers inside brackets correspond to the position of the proteolytic peptide of the sequence of KLH1.

i) Methionine sulfoxide

**Table S11.** Amino acid changes detected in KLH2 using the Peaks software [5].

| #  | Assignment <sup>1)</sup> | Modification site                              | m/z       | z | error (ppm) |
|----|--------------------------|------------------------------------------------|-----------|---|-------------|
| 1  | [8-22]                   | Ser <sup>11</sup> →His                         | 834.9264  | 2 | 1.0         |
| 2  | [8-22]                   | Ser <sup>13</sup> →Asn                         | 823.4216  | 2 | 5.0         |
| 3  | [73-80]                  | Leu <sup>78</sup> →Met                         | 519.2764  | 2 | 0.7         |
| 4  | [73-80]                  | Leu <sup>78</sup> →Met, Leu <sup>73</sup> →Asn | 519.7565  | 2 | 1.9         |
| 5  | [87-119]                 | Gly <sup>114</sup> →Asp                        | 1246.9608 | 3 | -0.3        |
| 5  | [92-119]                 | Gly <sup>114</sup> →Asp                        | 1085.2017 | 3 | 2.0         |
| 5  | [94-119]                 | Gly <sup>114</sup> →Asp                        | 749.1242  | 4 | 2.3         |
| 5  | [97-119]                 | Gly <sup>114</sup> →Asp                        | 627.3265  | 4 | 0.7         |
| 5  | [99-119]                 | Gly <sup>114</sup> →Asp                        | 1159.6086 | 2 | 3.2         |
| 5  | [99-119]                 | Gly <sup>114</sup> →Asp                        | 580.3090  | 4 | 4.9         |
| 5  | [100-119]                | Gly <sup>114</sup> →Asp                        | 548.0449  | 4 | -1.1        |
| 5  | [101-119]                | Gly <sup>114</sup> →Asp                        | 692.6992  | 3 | 3.4         |
| 5  | [102-119]                | Gly <sup>114</sup> →Asp                        | 494.5109  | 4 | -3.3        |
| 5  | [102-119]                | Gly <sup>114</sup> →Asp                        | 659.0153  | 3 | 1.6         |
| 5  | [106-119]                | Gly <sup>114</sup> →Asp                        | 500.2685  | 3 | 0.6         |
| 5  | [106-116]                | Gly <sup>114</sup> →Asp                        | 628.8299  | 2 | 0.4         |
| 5  | [108-119]                | Gly <sup>114</sup> →Asp                        | 643.8235  | 2 | 1.7         |
| 5  | [109-119]                | Gly <sup>114</sup> →Asp                        | 600.3060  | 2 | -0.6        |
| 5  | [110-119]                | Gly <sup>114</sup> →Asp                        | 531.7769  | 2 | 0           |
| 5  | [113-119]                | Gly <sup>114</sup> →Asp                        | 353.1743  | 2 | 0.1         |
| 6  | [120-135]                | Asp <sup>122</sup> →His                        | 494.0011  | 4 | 2.5         |
| 7  | [192-217]                | Glu <sup>200</sup> →Gln                        | 800.1133  | 4 | -6.9        |
| 8  | [202-217]                | Ser <sup>203</sup> →Thr                        | 655.3145  | 3 | -0.2        |
| 8  | [203-217]                | Ser <sup>203</sup> →Thr                        | 621.6306  | 3 | -2.5        |
| 9  | [232-265]                | Asp <sup>237</sup> →Asn                        | 786.1641  | 5 | -9.8        |
| 10 | [266-274]                | Ala <sup>267</sup> →Leu/Ile                    | 535.2516  | 2 | 1.1         |
| 11 | [266-299] <sup>ii)</sup> | Ser <sup>269</sup> →Val                        | 1299.2634 | 3 | -9.3        |
| 11 | [266-302] <sup>i)</sup>  | Ser <sup>269</sup> →Val                        | 1046.2483 | 4 | -1.1        |
| 12 | [318-339] <sup>ii)</sup> | Ser <sup>333</sup> →Ala                        | 643.8136  | 4 | 1.7         |
| 12 | [324-339] <sup>ii)</sup> | Ser <sup>333</sup> →Ala                        | 642.9651  | 3 | 0.7         |
| 12 | [326-339] <sup>ii)</sup> | Ser <sup>333</sup> →Ala                        | 556.5994  | 3 | 1.9         |
| 12 | [327-339] <sup>ii)</sup> | Ser <sup>333</sup> →Ala                        | 504.5646  | 3 | -0.1        |
| 12 | [329-339] <sup>ii)</sup> | Ser <sup>333</sup> →Ala                        | 672.2985  | 2 | 0.1         |
| 12 | [332-339] <sup>ii)</sup> | Ser <sup>333</sup> →Ala                        | 481.7346  | 2 | 0.9         |
| 13 | [331-353] <sup>ii)</sup> | Glu <sup>331</sup> →His                        | 860.4118  | 3 | -2.3        |
| 14 | [340-353] <sup>i)</sup>  | Leu <sup>346</sup> →Met oxidated               | 758.8500  | 2 | 7.8         |

|          |                          |                                                                           |           |   |      |
|----------|--------------------------|---------------------------------------------------------------------------|-----------|---|------|
| 15       | [359-382]                | Asp <sup>373</sup> →Asn                                                   | 542.8453  | 5 | -7.2 |
| 16       | [410-422]                | Ala <sup>420</sup> →Arg                                                   | 483.2612  | 3 | -7.9 |
| 17       | [410-425]                | Ala <sup>425</sup> →Arg                                                   | 582.6499  | 3 | -5.4 |
| 18       | [429-443]                | Asp <sup>432</sup> →Asn                                                   | 883.4516  | 2 | -6.8 |
| 19       | [453-476] <sup>ii)</sup> | Asp <sup>455</sup> →Asn                                                   | 671.8336  | 4 | -8.8 |
| 20       | [453-469]                | Ala <sup>465</sup> →Gly                                                   | 616.3083  | 3 | 1.2  |
| 21,22    | [459-476] <sup>ii)</sup> | Ala <sup>459</sup> →Trp, Thr <sup>460</sup> →Pro                          | 537.5308  | 4 | 2.1  |
| 23       | [495-506]                | Arg <sup>506</sup> →Lys                                                   | 688.3949  | 2 | -0.5 |
| 24       | [603-615]                | Ala <sup>605</sup> →Asn                                                   | 483.5718  | 3 | -1.5 |
| 24       | [605-615]                | Ala <sup>605</sup> →Asn                                                   | 399.8722  | 3 | 0.8  |
| 25       | [606-615]                | Ile <sup>606</sup> →His                                                   | 554.2694  | 2 | -1.3 |
| 26       | [657-669] <sup>ii)</sup> | Ser <sup>661</sup> →Trp                                                   | 806.3871  | 2 | -1.7 |
| 26       | [659-669] <sup>ii)</sup> | Ser <sup>661</sup> →Trp                                                   | 702.3370  | 2 | -4.8 |
| 27       | [683-702]                | Val <sup>696</sup> →Glu                                                   | 607.5411  | 4 | 2.5  |
| 27,28,29 | [683-702]                | Val <sup>696</sup> →Glu, His <sup>700</sup> →Asp, His <sup>689</sup> →Glu | 1198.5563 | 2 | 0.6  |
| 27,28    | [687-702]                | Val <sup>696</sup> →Glu, His <sup>700</sup> →Asp                          | 630.6349  | 3 | -0.8 |
| 30       | [772-779]                | Gly <sup>773</sup> →Ala                                                   | 558.7695  | 2 | 2.1  |
| 30       | [772-779] <sup>i)</sup>  | Gly <sup>773</sup> →Ala                                                   | 566.7664  | 2 | 0.9  |
| 30       | [773-779]                | Gly <sup>773</sup> →Ala                                                   | 465.7294  | 2 | 1.5  |
| 31,32    | [780-787]                | Glu <sup>784</sup> →Asp, Leu <sup>786</sup> →Ala                          | 455.7317  | 2 | 4.9  |
| 33,34    | [845-863]                | Val <sup>846</sup> →Ala, Thr <sup>850</sup> →Asn                          | 731.0200  | 3 | 2.1  |
| 33,34    | [846-863]                | Val <sup>846</sup> →Ala, Thr <sup>850</sup> →Asn                          | 697.3355  | 3 | -0.5 |
| 35       | [918-933]                | Ser <sup>932</sup> →Pro                                                   | 640.9664  | 3 | -0.2 |
| 35       | [918-934]                | Ser <sup>932</sup> →Pro                                                   | 669.9777  | 3 | 0.8  |
| 35       | [918-933]                | Ser <sup>932</sup> →Pro                                                   | 640.9673  | 3 | 1.2  |
| 36       | [955-972]                | His <sup>959</sup> →Tyr                                                   | 1053.9719 | 2 | -0.5 |
| 36       | [958-972]                | His <sup>959</sup> →Tyr                                                   | 594.2758  | 3 | -1.2 |
| 36       | [959-972]                | His <sup>959</sup> →Tyr                                                   | 532.2478  | 3 | -4.3 |
| 36       | [963-972]                | His <sup>959</sup> →Tyr                                                   | 529.7503  | 2 | 6.8  |
| 37       | [973-992]                | Asp <sup>977</sup> →Ala                                                   | 564.0306  | 4 | 3.1  |
| 38       | [1006-1014]              | Val <sup>1008</sup> →Leu/Ile                                              | 567.2858  | 2 | 1.6  |
| 39       | [1019-1033]              | Val <sup>1021</sup> →Leu/Ile                                              | 797.8972  | 2 | -1.5 |
| 40       | [1019-1045]              | Arg <sup>1045</sup> →His                                                  | 779.6302  | 4 | 0.2  |
| 40       | [1030-1045]              | Arg <sup>1045</sup> →His                                                  | 500.0043  | 4 | 2.0  |
| 40       | [1031-1045]              | Arg <sup>1045</sup> →His                                                  | 637.3237  | 3 | -1.5 |
| 40       | [1034-1045]              | Arg <sup>1045</sup> →His                                                  | 518.5854  | 3 | -0.4 |
| 40       | [1034-1050]              | Arg <sup>1045</sup> →His                                                  | 532.5050  | 4 | 2.4  |
| 40       | [1034-1046]              | Arg <sup>1045</sup> →His                                                  | 547.5972  | 3 | 1.6  |
| 40       | [1035-1045]              | Arg <sup>1045</sup> →His                                                  | 695.8437  | 2 | 0.8  |

|          |                            |                                                                             |           |   |      |
|----------|----------------------------|-----------------------------------------------------------------------------|-----------|---|------|
| 41       | [1065-1078] <sup>ii)</sup> | Thr <sup>1068</sup> →Ser                                                    | 528.2567  | 3 | 5.8  |
| 42       | [1074-1098] <sup>i)</sup>  | Ala <sup>1074</sup> →His                                                    | 734.3569  | 4 | -3.6 |
| 42       | [1074-1108] <sup>i)</sup>  | Ala <sup>1074</sup> →His                                                    | 696.3461  | 6 | -4.9 |
| 43       | [1079-1098]                | Asp <sup>1086</sup> →Asn                                                    | 760.0382  | 3 | -4.3 |
| 44       | [1109-1136]                | Glu <sup>1114</sup> →Gln                                                    | 847.9255  | 4 | -6.7 |
| 45       | [1109-1136]                | Glu <sup>1116</sup> →Gln                                                    | 678.5436  | 5 | -4.2 |
| 46       | [1137-1149]                | Glu <sup>1149</sup> →Gln                                                    | 509.6014  | 3 | 2.2  |
| 47       | [1141-1157]                | Leu <sup>1147</sup> →Tyr, His <sup>1149</sup> insertion                     | 1008.5466 | 2 | 7.8  |
| 48       | [1194-1214]                | Glu <sup>1195</sup> →Gln                                                    | 636.8230  | 4 | -7.0 |
| 49       | [1196-1210]                | Asn <sup>1210</sup> →Arg                                                    | 440.7334  | 4 | 1.9  |
| 50       | [1276-1283]                | Leu <sup>1279</sup> →Ser                                                    | 454.7443  | 2 | -2.5 |
| 51       | [1323-1335]                | Leu <sup>1323</sup> →Arg                                                    | 801.9478  | 2 | -4.9 |
| 52       | [1385-1399]                | Trp <sup>1396</sup> →Ser                                                    | 552.9456  | 3 | 2.1  |
| 53       | [1438-1461]                | Asp <sup>1444</sup> →Asn                                                    | 704.0975  | 4 | 0.1  |
| 54       | [1439-1461]                | Thr <sup>1446</sup> →Ala                                                    | 656.0749  | 4 | -0.2 |
| 54       | [1442-1461]                | Thr <sup>1446</sup> →Ala                                                    | 584.2875  | 4 | -0.9 |
| 55,56    | [1476-1489] <sup>ii)</sup> | Glu <sup>1479</sup> → Asp, Ala <sup>1480</sup> → Pro                        | 854.8750  | 2 | 0.6  |
| 57       | [1476-1489] <sup>ii)</sup> | Asp <sup>1481</sup> → Asn                                                   | 565.9194  | 3 | -8.3 |
| 58       | [1475-1489] <sup>ii)</sup> | Val <sup>1484</sup> → Leu/Ile                                               | 613.6226  | 3 | 0.4  |
| 58       | [1476-1489] <sup>ii)</sup> | Val <sup>1484</sup> → Leu/Ile                                               | 570.9248  | 3 | 1.4  |
| 59       | [1476-1489] <sup>ii)</sup> | Arg <sup>1488</sup> → Leu/Ile                                               | 827.3665  | 2 | 0.6  |
| 59       | [1475-1489] <sup>ii)</sup> | Arg <sup>1488</sup> → Leu/Ile                                               | 594.6121  | 3 | 1.2  |
| 60       | [1497-1507]                | Pro <sup>1497</sup> →Thr, Glu <sup>1498</sup> →His                          | 623.8043  | 2 | -6.6 |
| 61       | [1582-1605]                | Ile <sup>1589</sup> →Met                                                    | 691.5926  | 4 | 7.8  |
| 62       | [1584-1605]                | Met <sup>1596</sup> →Thr                                                    | 622.3151  | 4 | 1.4  |
| 63,64,65 | [1584-1605]                | Ser <sup>1586</sup> →Glu,Ile <sup>1589</sup> →Val, His <sup>1599</sup> →Leu | 840.7545  | 3 | 0.5  |
| 63,64,65 | [1584-1602]                | Ser <sup>1586</sup> →Glu,Ile <sup>1589</sup> →Val, His <sup>1599</sup> →Leu | 1058.5076 | 2 | 1.1  |
| 63,64,65 | [1584-1605] <sup>i)</sup>  | Ser <sup>1586</sup> →Glu,Ile <sup>1589</sup> →Val, His <sup>1599</sup> →Leu | 846.0864  | 3 | 0.7  |
| 66       | [1584-1605]                | His <sup>1599</sup> →Asp                                                    | 832.0718  | 3 | 2.0  |
| 67       | [1590-1605]                | Phe <sup>1598</sup> →Val                                                    | 631.3157  | 3 | -2.3 |
| 68       | [1606-1614]                | Ser <sup>1610</sup> →Glu                                                    | 358.5264  | 3 | 1.9  |
| 69       | [1606-1614]                | His <sup>1613</sup> →Asn                                                    | 504.7718  | 2 | 0.3  |
| 70       | [1614-1627]                | Lys <sup>1614</sup> →Arg                                                    | 508.6140  | 3 | -3.6 |
| 71       | [1642-1655]                | Arg <sup>1655</sup> →His                                                    | 782.9209  | 2 | -1.5 |
| 72       | [1672-1681]                | Thr <sup>1677</sup> →Asp                                                    | 560.7916  | 2 | 2.4  |
| 73       | [1690-1707]                | Ala <sup>1693</sup> →Asp                                                    | 1012.9195 | 2 | 1.3  |
| 73       | [1690-1707] <sup>i)</sup>  | Ala <sup>1693</sup> →Asp                                                    | 1020.9155 | 2 | -0.1 |
| 74       | [1764-1784]                | Asp <sup>1770</sup> →Asn                                                    | 610.5617  | 4 | -2.1 |
| 75       | [1764-1784]                | His <sup>1779</sup> →Asp                                                    | 806.7402  | 3 | 9.9  |

|                  |                            |                                                                              |           |   |      |
|------------------|----------------------------|------------------------------------------------------------------------------|-----------|---|------|
| <b>76</b>        | [1792-1816]                | Ala <sup>1793</sup> →Asp                                                     | 713.1020  | 4 | 9.6  |
| <b>77</b>        | [1793-1816]                | Glu <sup>1796</sup> →Gln                                                     | 892.7620  | 3 | -6.9 |
| <b>78</b>        | [1793-1816]                | Glu <sup>1798</sup> →Gln                                                     | 669.8214  | 4 | -9.9 |
| <b>79</b>        | [1793-1816]                | Glu <sup>1800</sup> →Gln                                                     | 892.7606  | 3 | -8.5 |
| <b>80</b>        | [1913-1928]                | Lys <sup>1916</sup> →Asn                                                     | 905.4488  | 2 | 5.4  |
| <b>81</b>        | [1936-1967]                | Thr <sup>1939</sup> →Leu/Ile                                                 | 965.1912  | 4 | -9.3 |
| <b>82</b>        | [1930-1944]                | Asp <sup>1941</sup> →Asn                                                     | 475.4724  | 4 | 0.4  |
| <b>83</b>        | [1936-1944]                | Asp <sup>1941</sup> →Asn                                                     | 393.5124  | 3 | 0.2  |
| <b>84</b>        | [1929-1967]                | Glu <sup>1953</sup> →Gln                                                     | 787.7031  | 6 | -4.6 |
| <b>85</b>        | [1929-1967]                | Val <sup>1955</sup> →Thr                                                     | 1181.8087 | 4 | 9.7  |
| <b>86</b>        | [2004-2022]                | Ala <sup>2004</sup> →Thr                                                     | 721.9979  | 3 | -0.6 |
| <b>87</b>        | [2037-2046]                | Leu <sup>2037</sup> →Gln                                                     | 429.5534  | 3 | 6.4  |
| <b>88</b>        | [2051-2073]                | Leu <sup>2069</sup> →Phe                                                     | 1208.6168 | 2 | 5.6  |
| <b>88</b>        | [2052-2073]                | Leu <sup>2069</sup> →Phe                                                     | 1151.0962 | 2 | -0.4 |
| <b>88</b>        | [2057-2070]                | Leu <sup>2069</sup> →Phe                                                     | 773.4067  | 2 | 1.0  |
| <b>88</b>        | [2059-2070]                | Leu <sup>2069</sup> →Phe                                                     | 659.3520  | 2 | 2.4  |
| <b>88</b>        | [2061-2073]                | Leu <sup>2069</sup> →Phe                                                     | 715.4009  | 2 | 0.7  |
| <b>88</b>        | [2063-2073]                | Leu <sup>2069</sup> →Phe                                                     | 602.3154  | 2 | -1.7 |
| <b>88</b>        | [2066-2073]                | Leu <sup>2069</sup> →Phe                                                     | 454.7404  | 2 | 1.2  |
| <b>88</b>        | [2067-2073]                | Leu <sup>2069</sup> →Phe                                                     | 411.2245  | 2 | 1.6  |
| <b>89</b>        | [2120-2129]                | Ser <sup>2129</sup> →Gln                                                     | 520.7793  | 2 | -1.0 |
| <b>90</b>        | [2154-2179]                | Ala <sup>2162</sup> →Asn                                                     | 1018.5049 | 3 | 3.3  |
| <b>91</b>        | [2213-2243]                | Leu <sup>2243</sup> →Gln                                                     | 888.4324  | 4 | 7.3  |
| <b>92,93</b>     | [2213-2248]                | Leu <sup>2243</sup> →Ala, Glu <sup>2247</sup> →Leu                           | 1008.7646 | 4 | 7.0  |
| <b>94,95, 96</b> | [2236-2249]                | Leu <sup>2239</sup> →Tyr, Thr <sup>2242</sup> →Ala, Thr <sup>2249</sup> →Arg | 809.9427  | 2 | -1.1 |
| <b>97</b>        | [2252-2272]                | Cys <sup>2252</sup> →Ser                                                     | 806.0796  | 3 | 8.2  |
| <b>98</b>        | [2250-2272] <sup>ii)</sup> | Val <sup>2261</sup> →Met, Ala <sup>2264</sup> →Thr                           | 704.0779  | 4 | 3.1  |
| <b>99</b>        | [2280-2298]                | Tyr <sup>2282</sup> →Phe                                                     | 574.0240  | 4 | -3.6 |
| <b>100</b>       | [2276-2298]                | Ala <sup>2288</sup> →Leu/Ile                                                 | 678.0875  | 4 | 6.9  |
| <b>101</b>       | [2343-2381] <sup>i)</sup>  | Val <sup>2346</sup> →Pro                                                     | 929.6542  | 5 | 2.9  |
| <b>102</b>       | [2386-2397]                | His <sup>2393</sup> →Asp                                                     | 632.8556  | 2 | -0.7 |
| <b>103</b>       | [2426-2436]                | His <sup>2428</sup> →Asp                                                     | 492.2195  | 3 | 1.3  |
| <b>104</b>       | [2445-2463]                | His <sup>2449</sup> →Asp                                                     | 1078.0146 | 2 | -0.4 |
| <b>105</b>       | [2480-2508]                | Ile <sup>2484</sup> →Asn, Glu <sup>2490</sup> →Gln                           | 737.1091  | 4 | 8.9  |
| <b>106</b>       | [2634-2650] <sup>i)</sup>  | His <sup>2642</sup> →Gln                                                     | 1049.4475 | 2 | 1.0  |
| <b>107</b>       | [2719-2735] <sup>ii)</sup> | Gln <sup>2723</sup> →Pro                                                     | 513.7607  | 4 | 4.5  |
| <b>108</b>       | [2721-2735] <sup>ii)</sup> | Gln <sup>2723</sup> →Pro                                                     | 578.2885  | 3 | 2.0  |
| <b>108</b>       | [2723-2735] <sup>ii)</sup> | Gln <sup>2723</sup> →Pro                                                     | 510.2554  | 3 | -3.9 |
| <b>108</b>       | [2723-2735] <sup>ii)</sup> | Gln <sup>2723</sup> →Pro                                                     | 764.8828  | 2 | 0.5  |

|                 |                           |                                                    |           |   |      |
|-----------------|---------------------------|----------------------------------------------------|-----------|---|------|
| <b>109</b>      | [2736-2754]               | Lys <sup>2739</sup> →Arg                           | 727.3795  | 3 | -3.7 |
| <b>110</b>      | [2757-2765]               | Arg <sup>2765</sup> →Lys                           | 537.2428  | 2 | -0.3 |
| <b>111,112</b>  | [2855-2869]               | His <sup>2859</sup> →Phe, Glu <sup>2867</sup> →Ala | 630.6305  | 3 | -6.4 |
| <b>111,112</b>  | [2855-2869] <sup>i)</sup> | His <sup>2859</sup> →Phe, Glu <sup>2867</sup> →Ala | 641.2984  | 3 | 0.9  |
| <b>111,112</b>  | [2855-2869]               | His <sup>2859</sup> →Phe, Glu <sup>2867</sup> →Ala | 635.9661  | 3 | -0.2 |
| <b>111,112</b>  | [2857-2869]               | His <sup>2859</sup> →Phe, Glu <sup>2867</sup> →Ala | 549.5999  | 3 | 0.2  |
| <b>112</b>      | [2861-2869]               | Glu <sup>2867</sup> →Ala                           | 547.2700  | 2 | 1.3  |
| <b>112</b>      | [2862-2869]               | Glu <sup>2867</sup> →Ala                           | 489.7565  | 2 | 1.4  |
| <b>113,114</b>  | [2870-2884]               | Ile <sup>2870</sup> →Val, Arg <sup>2882</sup> →Ser | 759.3889  | 2 | 0.8  |
| <b>114</b>      | [2875-2884]               | Arg <sup>2882</sup> →Ala                           | 523.7724  | 2 | 1.0  |
| <b>115, 116</b> | [2885-2895]               | Gly <sup>2892</sup> →Gln, Gly <sup>2893</sup> →Ala | 424.5294  | 3 | -2.1 |
| <b>117</b>      | [2916-2934]               | Gly <sup>2918</sup> →Asp                           | 713.0278  | 3 | 1.4  |
| <b>117</b>      | [2916-2929]               | Gly <sup>2918</sup> →Asp                           | 774.3738  | 2 | -2.1 |
| <b>118, 119</b> | [2989-3006]               | Lys <sup>2991</sup> →Arg, Ile <sup>2999</sup> →Val | 718.0257  | 3 | -4.5 |
| <b>119</b>      | [2992-3006]               | Ile <sup>2999</sup> →Val                           | 604.6218  | 3 | 0.5  |
| <b>119</b>      | [2992-3006]               | Ile <sup>2999</sup> →Val                           | 906.4286  | 2 | 0.1  |
| <b>119</b>      | [2992-3006]               | Ile <sup>2999</sup> →Val                           | 609.9546  | 3 | -7.8 |
| <b>119</b>      | [2993-3006]               | Ile <sup>2999</sup> →Val                           | 561.6071  | 3 | -0.4 |
| <b>119</b>      | [2994-3006]               | Ile <sup>2999</sup> →Val                           | 773.3787  | 2 | 1.0  |
| <b>119</b>      | [2996-3006]               | Ile <sup>2999</sup> →Val                           | 467.9039  | 3 | 1.6  |
| <b>120</b>      | [2992-3006]               | Ile <sup>2999</sup> →Val                           | 467.9734  | 4 | -5.8 |
| <b>121, 122</b> | [3007-3026]               | Ile <sup>3009</sup> →Thr, Ser <sup>3021</sup> →Asn | 741.3451  | 3 | -0.6 |
| <b>121, 122</b> | [3007-3026]               | Ile <sup>3009</sup> →Thr, Ser <sup>3021</sup> →Asn | 1111.5149 | 2 | 0.2  |
| <b>121, 122</b> | [3007-3026] <sup>i)</sup> | Ile <sup>3009</sup> →Thr, Ser <sup>3021</sup> →Asn | 1119.5160 | 2 | 3.4  |
| <b>121, 122</b> | [3009-3026]               | Ile <sup>3009</sup> →Thr, Ser <sup>3021</sup> →Asn | 668.6551  | 3 | 0.5  |
| <b>122</b>      | [3010-3026]               | Ser <sup>3021</sup> →Asn                           | 951.9561  | 2 | 1.5  |
| <b>122</b>      | [3014-3026]               | Ser <sup>3021</sup> →Asn                           | 775.8482  | 2 | -1.2 |
| <b>122</b>      | [3015-3026]               | Ser <sup>3021</sup> →Asn                           | 702.3167  | 2 | 2.4  |
| <b>122</b>      | [3016-3026]               | Ser <sup>3021</sup> →Asn                           | 628.7814  | 2 | 1.1  |
| <b>122</b>      | [3017-3026]               | Ser <sup>3021</sup> →Asn                           | 593.2618  | 2 | -0.5 |
| <b>122</b>      | [3019-3026]               | Ser <sup>3021</sup> →Asn                           | 492.2336  | 2 | 1.8  |
| <b>123, 124</b> | [3094-3116] <sup>i)</sup> | Ser <sup>3097</sup> →Thr, Ala <sup>3099</sup> →Glu | 878.0879  | 3 | 2.7  |
| <b>123, 124</b> | [3097-3116] <sup>i)</sup> | Ser <sup>3097</sup> →Thr, Ala <sup>3099</sup> →Glu | 776.3851  | 3 | 1.3  |
| <b>125</b>      | [3101-3116]               | Tyr <sup>3103</sup> →Phe                           | 902.9581  | 2 | 2.2  |
| <b>125</b>      | [3101-3116]               | Tyr <sup>3103</sup> →Phe                           | 602.3057  | 3 | -1.4 |
| <b>126, 127</b> | [3188-3204]               | Ser <sup>3193</sup> →Asn, Asn <sup>3201</sup> →Thr | 501.7804  | 4 | 0.7  |
| <b>126</b>      | [3188-3200]               | Ser <sup>3193</sup> →Asp                           | 508.2812  | 3 | 4.4  |
| <b>126</b>      | [3188-3200]               | Ser <sup>3193</sup> →Asn                           | 761.4232  | 2 | 0.5  |
| <b>126</b>      | [3189-3200]               | Ser <sup>3193</sup> →Asn                           | 478.9401  | 3 | -0.5 |

|                               |                            |                                                                                                           |           |   |      |
|-------------------------------|----------------------------|-----------------------------------------------------------------------------------------------------------|-----------|---|------|
| <b>126</b>                    | [3190-3200]                | Ser <sup>3193</sup> →Asn                                                                                  | 661.3636  | 2 | -1.7 |
| <b>126</b>                    | [3191-3200]                | Ser <sup>3193</sup> →Asn                                                                                  | 597.3340  | 2 | -2.5 |
| <b>126</b>                    | [3192-3200]                | Ser <sup>3193</sup> →Asn                                                                                  | 355.5460  | 3 | 2.2  |
| <b>126</b>                    | [3192-3200]                | Ser <sup>3193</sup> →Asn                                                                                  | 532.8128  | 2 | -2.5 |
| <b>127, 128,<br/>129, 130</b> | [3222-3244]                | Asn <sup>3233</sup> →Tyr, Ser <sup>3236</sup> →Thr, Val <sup>3238</sup> →Ala,<br>Pro <sup>3242</sup> →Ala | 1255.1392 | 2 | -0.4 |
| <b>131</b>                    | [3267-3280]                | Val <sup>3279</sup> →L/I                                                                                  | 901.9203  | 2 | 3.0  |
| <b>132</b>                    | [3267-3280] <sup>i)</sup>  | Val <sup>3279</sup> →L/I                                                                                  | 606.9470  | 3 | 1.9  |
| <b>133</b>                    | [3356-3374]                | Asn <sup>3363</sup> →His                                                                                  | 566.7847  | 4 | 1.5  |
| <b>134</b>                    | [3358-3374]                | Asn <sup>3363</sup> →His                                                                                  | 517.2491  | 4 | -0.9 |
| <b>135</b>                    | [3386-3402] <sup>ii)</sup> | Thr <sup>3389</sup> →Ala                                                                                  | 659.9877  | 3 | 1.9  |

1) Numbers inside brackets correspond to the position of the proteolytic peptide of the sequence of KLH2.

i) Methionine sulfoxide

ii) Carbamidomethylation of Cys



**Table S12.** Post-translational modifications found in KLH proteins using the Peaks software [5].

| #                          | Protein | Residue             | Assignment <sup>1)</sup> | m/z exp.  | m/z theor. | Z | Error (ppm) |
|----------------------------|---------|---------------------|--------------------------|-----------|------------|---|-------------|
| <b>Oxidation to nitro</b>  |         |                     |                          |           |            |   |             |
| 1                          | KLH1    | Tyr <sup>461</sup>  | [451-467]                | 627.2889  | 627.2901   | 3 | -1.9        |
| 2                          |         | Tyr <sup>946</sup>  | [946-955]                | 598.2608  | 598.2589   | 2 | 3.2         |
| 3                          |         | Tyr <sup>1361</sup> | [1349-1365]              | 519.2578  | 519.2549   | 4 | 5.6         |
| 4                          |         | Tyr <sup>1444</sup> | [1437-1460]              | 716.5759  | 716.5744   | 4 | 2.1         |
| 5                          |         | Tyr <sup>1737</sup> | [1736-1746]              | 707.8544  | 707.8511   | 2 | 4.7         |
| 6                          |         | Tyr <sup>1940</sup> | [1934-1942]              | 594.2476  | 594.2458   | 2 | 3.0         |
| 7                          |         | Tyr <sup>1945</sup> | [1943-1958]              | 991.9680  | 991.9668   | 2 | 1.2         |
| 8                          |         | Tyr <sup>2647</sup> | [2641-2648]              | 519.2214  | 519.2196   | 2 | 3.5         |
| 9                          |         | Tyr <sup>2768</sup> | [2764-2772]              | 631.2837  | 631.2831   | 2 | 1.0         |
| 1                          | KLH2    | Tyr <sup>74</sup>   | [73-80]                  | 532.7890  | 532.7900   | 2 | -1.9        |
| 2                          |         | Tyr <sup>439</sup>  | [429-443]                | 604.6310  | 604.6301   | 3 | 1.5         |
| 3                          |         | Tyr <sup>1287</sup> | [1284-1292]              | 541.2609  | 541.2613   | 2 | -0.7        |
| 4                          |         | Tyr <sup>1324</sup> | [1323-1335]              | 802.9360  | 802.9349   | 2 | 1.4         |
| 5                          |         | Tyr <sup>1362</sup> | [1350-1366]              | 964.9530  | 964.9519   | 2 | 1.1         |
| 6                          |         | Tyr <sup>1477</sup> | [1476-1489]              | 581.2477  | 581.2468   | 3 | 1.5         |
| 7                          |         | Tyr <sup>1604</sup> | [1584-1605]              | 641.0587  | 641.0582   | 4 | 0.8         |
| 8                          |         | Tyr <sup>1739</sup> | [1738-1748]              | 694.3439  | 694.3400   | 2 | 5.6         |
| 9                          |         | Tyr <sup>1942</sup> | [1930-1944]              | 486.9653  | 486.9642   | 4 | 2.3         |
| 10                         |         | Tyr <sup>2039</sup> | [2037-2046]              | 439.5552  | 439.5540   | 3 | 2.7         |
| 11                         |         | Tyr <sup>2193</sup> | [2184-2208]              | 1000.4786 | 1000.4775  | 3 | 1.1         |
| 12                         |         | Tyr <sup>2431</sup> | [2426-2436]              | 514.5580  | 514.5577   | 3 | 0.6         |
| 13                         |         | Tyr <sup>2437</sup> | [2437-2444]              | 498.7544  | 498.7531   | 2 | 2.6         |
| 14                         |         | Tyr <sup>3379</sup> | [3375-3385]              | 422.8631  | 422.8631   | 3 | 0.0         |
| <b>Hydroxylation (Tyr)</b> |         |                     |                          |           |            |   |             |
| 1                          | KLH1    | Tyr <sup>946</sup>  | [946-955]                | 583.7651  | 583.7638   | 2 | 2.2         |
| 2                          |         | Tyr <sup>1043</sup> | [1035-1051]              | 529.0002  | 528.9996   | 4 | 1.1         |
| 3                          |         | Tyr <sup>1108</sup> | [1098-1109]              | 499.9062  | 499.9049   | 3 | 2.6         |
| 4                          |         | Tyr <sup>1193</sup> | [1193-1198]              | 392.6902  | 392.6896   | 2 | 1.5         |
| 5                          |         | Tyr <sup>1361</sup> | [1349-1365]              | 512.0078  | 512.0074   | 4 | 0.8         |
| 6                          |         | Tyr <sup>1737</sup> | [1736-1746]              | 693.3585  | 693.3560   | 2 | 3.6         |
| 7                          |         | Tyr <sup>2153</sup> | [2152-2162]              | 699.3745  | 699.3742   | 2 | 0.4         |
| 8                          |         | Tyr <sup>2192</sup> | [2190-2196]              | 523.7327  | 523.7323   | 2 | 0.8         |
| 9                          |         | Tyr <sup>2208</sup> | [2207-2218]              | 470.8937  | 470.8929   | 3 | 1.7         |
| 10                         |         | Tyr <sup>2215</sup> | [2207-2218]              | 470.8937  | 470.8929   | 3 | 1.7         |
| 11                         |         | Tyr <sup>2351</sup> | [2351-2357]              | 465.2405  | 465.2398   | 2 | 1.5         |
| 12                         |         | Tyr <sup>2435</sup> | [2435-2461]              | 798.8958  | 798.8904   | 4 | 6.8         |
| 13                         |         | Tyr <sup>2768</sup> | [2764-2772]              | 616.7875  | 616.7880   | 2 | -0.8        |
| 14                         |         | Tyr <sup>3229</sup> | [3221-3240]              | 1002.956  | 1002.9542  | 2 | 1.8         |

|                            |                     |                     |                               |          |          |      |      |
|----------------------------|---------------------|---------------------|-------------------------------|----------|----------|------|------|
| 1                          | KLH2                | Tyr <sup>74</sup>   | [73-80]                       | 518.2947 | 518.2949 | 2    | -0.4 |
| 2                          |                     | Tyr <sup>439</sup>  | [429-442]                     | 827.9004 | 827.8987 | 2    | 2.1  |
| 2                          |                     | Tyr <sup>439</sup>  | [429-443]                     | 891.9482 | 891.9461 | 2    | 2.4  |
| 3                          |                     | Tyr <sup>457</sup>  | [453-469]                     | 626.3145 | 626.3107 | 3    | 6.1  |
| 4                          |                     | Tyr <sup>631</sup>  | [616-639] <sup>ii)</sup>      | 733.8403 | 733.8389 | 4    | 1.9  |
| 5                          |                     | Tyr <sup>987</sup>  | [976-992]                     | 648.298  | 648.2983 | 3    | -0.5 |
| 6                          |                     | Tyr <sup>1115</sup> | [1109-1136]                   | 681.9437 | 681.9417 | 5    | 2.9  |
| 7                          |                     | Tyr <sup>1159</sup> | [1158-1162] <sup>i)</sup>     | 366.6730 | 366.6728 | 2    | 0.5  |
| 8                          |                     | Tyr <sup>1194</sup> | [1194-1214]                   | 854.4316 | 854.4264 | 3    | 6.1  |
| 9                          |                     | Tyr <sup>1287</sup> | [1284-1292]                   | 526.7675 | 526.7662 | 2    | 2.5  |
| 10                         |                     | Tyr <sup>1477</sup> | [1475-1489] <sup>i,iii)</sup> | 619.6128 | 619.6133 | 3    | -0.8 |
| 11                         |                     | Tyr <sup>1777</sup> | [1764-1784]                   | 614.8095 | 614.8073 | 4    | 3.6  |
| 12                         |                     | Tyr <sup>1942</sup> | [1929-1944]                   | 518.7431 | 518.7419 | 4    | 2.3  |
| 13                         |                     | Tyr <sup>2026</sup> | [2026-2030]                   | 328.1690 | 328.1684 | 2    | 1.8  |
| 13                         |                     | Tyr <sup>2026</sup> | [2026-2033] <sup>iii)</sup>   | 539.2642 | 539.2646 | 2    | -0.7 |
| 14                         |                     | Tyr <sup>2039</sup> | [2039-2046]                   | 509.7401 | 509.7397 | 2    | 0.8  |
| 14                         |                     | Tyr <sup>2039</sup> | [2037-2046]                   | 429.8908 | 429.8906 | 3    | 0.5  |
| 15                         |                     | Tyr <sup>2437</sup> | [2437-2444]                   | 484.2587 | 484.2580 | 2    | 1.4  |
| 16                         |                     | Tyr <sup>2670</sup> | [2692-2708]                   | 532.9986 | 532.9983 | 4    | 0.6  |
| 17                         | Tyr <sup>3256</sup> | [3256-3264]         | 548.7690                      | 548.7667 | 2        | 4.2  |      |
| 18                         | Tyr <sup>3371</sup> | [3367-3374]         | 330.8383                      | 330.8383 | 3        | 0.0  |      |
| 19                         | Tyr <sup>3378</sup> | [3375-3385]         | 413.1996                      | 413.1997 | 3        | -0.2 |      |
| <b>Hydroxylation (Trp)</b> |                     |                     |                               |          |          |      |      |
| 1                          | KLH1                | Trp <sup>771</sup>  | [771-778]                     | 535.7764 | 535.7742 | 2    | 4.1  |
| 2                          |                     | Trp <sup>959</sup>  | [956-969]                     | 566.2628 | 566.2617 | 3    | 1.9  |
| 3                          |                     | Trp <sup>1759</sup> | [1748-1763]                   | 628.3254 | 628.3244 | 3    | 1.6  |
| 4                          |                     | Trp <sup>2016</sup> | [2013-2023]                   | 491.2399 | 491.2392 | 3    | 1.4  |
| 4                          |                     | Trp <sup>2016</sup> | [2013-2023] <sup>ii)</sup>    | 496.5715 | 496.5709 | 3    | 1.2  |
| 5                          |                     | Trp <sup>2195</sup> | [2190-2198]                   | 430.2043 | 430.2033 | 3    | 2.3  |
| 5                          |                     | Trp <sup>2195</sup> | [2190-2196]                   | 523.7335 | 523.7323 | 2    | 2.3  |
| 6                          |                     | Trp <sup>2427</sup> | [2424-2434]                   | 482.2403 | 482.2394 | 3    | 1.9  |
| 6                          |                     | Trp <sup>2427</sup> | [2424-2434] <sup>ii)</sup>    | 487.5719 | 487.5710 | 3    | 1.8  |
| 6                          |                     | Trp <sup>2427</sup> | [2424-2431]                   | 528.7314 | 528.7318 | 2    | -0.8 |
| 7                          |                     | Trp <sup>2711</sup> | [2707-2718]                   | 796.9163 | 796.9139 | 2    | 3.0  |
| 1                          | KLH2                | Trp <sup>641</sup>  | [640-650]                     | 707.4044 | 707.4030 | 2    | 2.0  |
| 2                          |                     | Trp <sup>927</sup>  | [918-931]                     | 570.2665 | 570.2668 | 3    | -0.5 |
| 3                          |                     | Trp <sup>1396</sup> | [1390-1399]                   | 629.291  | 629.2905 | 2    | 0.8  |
| 4                          |                     | Trp <sup>1759</sup> | [1749-1763]                   | 614.9935 | 614.9927 | 3    | 1.3  |
| 4                          |                     | Trp <sup>1759</sup> | [1749-1763]                   | 614.9935 | 614.9927 | 3    | 1.3  |
| 5                          |                     | Trp <sup>1761</sup> | [1749-1763]                   | 614.9951 | 614.9927 | 3    | 3.9  |
| 6                          |                     | Trp <sup>1887</sup> | [1886-1897]                   | 522.945  | 522.9438 | 3    | 2.3  |
| 7                          |                     | Trp <sup>1890</sup> | [1886-1897]                   | 522.9448 | 522.9438 | 3    | 1.9  |
| 8                          | Trp <sup>2018</sup> | [2016-2022]         | 498.2248                      | 498.2236 | 2        | 2.4  |      |

|                               |                     |                            |                            |          |          |      |      |
|-------------------------------|---------------------|----------------------------|----------------------------|----------|----------|------|------|
| 9                             |                     | Trp <sup>2175</sup>        | [2161-2179]                | 721.3622 | 721.3622 | 3    | 0.0  |
| 10                            |                     | Trp <sup>2300</sup>        | [2299-2308]                | 629.8516 | 629.8502 | 2    | 2.2  |
| 11                            |                     | Trp <sup>2303</sup>        | [2299-2308]                | 629.8564 | 629.8502 | 2    | 9.8  |
| 12                            |                     | Trp <sup>2404</sup>        | [2403-2407] <sup>i)</sup>  | 385.1884 | 385.1886 | 2    | -0.5 |
| 12                            |                     | Trp <sup>2404</sup>        | [2403-2407] <sup>i)</sup>  | 385.1882 | 385.1886 | 2    | -1.0 |
| 13                            |                     | Trp <sup>2429</sup>        | [2426-2436]                | 378.9226 | 378.9227 | 4    | -0.3 |
| 13                            |                     | Trp <sup>2429</sup>        | [2426-2436] <sup>ii)</sup> | 382.9218 | 382.9214 | 4    | 1.0  |
| 14                            |                     | Trp <sup>3086</sup>        | [3078-3091]                | 525.9484 | 525.9471 | 3    | 2.5  |
| <b>Hydroxylation (His)</b>    |                     |                            |                            |          |          |      |      |
| 1                             | KLH1                | His <sup>783</sup>         | [779-786]                  | 494.7782 | 494.7764 | 2    | 3.6  |
| 2                             |                     | His <sup>1376</sup>        | [1366-1378]                | 412.6909 | 412.6907 | 4    | 0.5  |
| 3                             |                     | His <sup>2439</sup>        | [2435-2461]                | 798.8916 | 798.8904 | 4    | 1.5  |
| 1                             | KLH2                | His <sup>1201</sup>        | [1194-1214]                | 854.4259 | 854.4264 | 3    | -0.6 |
| 2                             |                     | His <sup>1206</sup>        | [1194-1214]                | 854.4294 | 854.4264 | 3    | 3.5  |
| 3                             |                     | His <sup>1905</sup>        | [1903-1912] <sup>i)</sup>  | 616.7755 | 616.7731 | 2    | 3.9  |
| 4                             |                     | His <sup>2728</sup>        | [2719-2735] <sup>i)</sup>  | 700.3460 | 700.3419 | 3    | 5.9  |
| <b>Di-hydroxylation (Trp)</b> |                     |                            |                            |          |          |      |      |
| 1                             | KLH1                | Trp <sup>352</sup>         | [352-368]                  | 562.5280 | 562.5268 | 4    | 2.1  |
| 1                             |                     | Trp <sup>352</sup>         | [352-368]                  | 562.5289 | 562.5268 | 4    | 3.7  |
| 2                             |                     | Trp <sup>643</sup>         | [639-649] <sup>ii)</sup>   | 725.3702 | 725.3684 | 2    | 2.5  |
| 3                             |                     | Trp <sup>881</sup>         | [881-889] <sup>i)</sup>    | 547.2358 | 547.2343 | 2    | 2.7  |
| 4                             |                     | Trp <sup>959</sup>         | [956-969]                  | 571.5930 | 571.5933 | 3    | -0.5 |
| 5                             |                     | Trp <sup>1757</sup>        | [1748-1763]                | 633.6568 | 633.6560 | 3    | 1.3  |
| 6                             |                     | Trp <sup>1759</sup>        | [1748-1763]                | 633.6569 | 633.6560 | 3    | 1.4  |
| 7                             |                     | Trp <sup>1788</sup>        | [1884-1893]                | 666.8570 | 666.8560 | 2    | 1.5  |
| 8                             |                     | Trp <sup>1885</sup>        | [1884-1893]                | 666.8566 | 666.8560 | 2    | 0.9  |
| 9                             |                     | Trp <sup>1955</sup>        | [1943-1958]                | 985.4708 | 985.4691 | 2    | 1.7  |
| 10                            |                     | Trp <sup>2016</sup>        | [2013-2023]                | 496.5715 | 496.5709 | 3    | 1.2  |
| 10                            |                     | Trp <sup>2016</sup>        | [2013-2023] <sup>ii)</sup> | 501.9026 | 501.9025 | 3    | 0.2  |
| 11                            |                     | Trp <sup>2195</sup>        | [2190-2196]                | 531.7299 | 531.7298 | 2    | 0.2  |
| 12                            |                     | Trp <sup>2301</sup>        | [2297-2306]                | 631.3130 | 631.3138 | 2    | -1.3 |
| 13                            |                     | Trp <sup>2427</sup>        | [2424-2434]                | 730.8538 | 730.8526 | 2    | 1.6  |
| 13                            | Trp <sup>2427</sup> | [2424-2434] <sup>ii)</sup> | 738.8523                   | 738.8500 | 2        | 3.1  |      |
| 14                            | Trp <sup>2711</sup> | [2707-2718]                | 804.9124                   | 804.9113 | 2        | 1.4  |      |
| 15                            | Trp <sup>2999</sup> | [2988-3021]                | 979.2117                   | 979.2106 | 4        | 1.1  |      |
| 1                             | KLH2                | Trp <sup>96</sup>          | [87-99]                    | 800.8608 | 800.8612 | 2    | -0.5 |
| 2                             |                     | Trp <sup>354</sup>         | [354-358]                  | 380.6744 | 380.6743 | 2    | 0.3  |
| 3                             |                     | Trp <sup>644</sup>         | [640-650]                  | 715.4017 | 715.4005 | 2    | 1.7  |
| 3                             |                     | Trp <sup>644</sup>         | [640-650]                  | 715.4017 | 715.4005 | 2    | 1.7  |
| 4                             |                     | Trp <sup>880</sup>         | [880-888] <sup>i)</sup>    | 568.2405 | 568.2395 | 2    | 1.8  |
| 5                             |                     | Trp <sup>927</sup>         | [918-931]                  | 575.6006 | 575.5984 | 3    | 3.8  |
| 6                             |                     | Trp <sup>1346</sup>        | [1336-1349]                | 820.8842 | 820.8824 | 2    | 2.2  |
| 7                             | Trp <sup>1396</sup> | [1390-1399]                | 637.2866                   | 637.2880 | 2        | -2.2 |      |

|                                    |      |                     |                             |          |          |   |      |
|------------------------------------|------|---------------------|-----------------------------|----------|----------|---|------|
| 8                                  |      | Trp <sup>1759</sup> | [1749-1763]                 | 465.4952 | 465.4952 | 4 | 0.0  |
| 9                                  |      | Trp <sup>1855</sup> | [1847-1860]                 | 512.9356 | 512.9352 | 3 | 0.8  |
| 10                                 |      | Trp <sup>1890</sup> | [1886-1897]                 | 791.9107 | 791.9092 | 2 | 1.9  |
| 11                                 |      | Trp <sup>2175</sup> | [2161-2179] <sup>ii)</sup>  | 732.0275 | 732.0255 | 3 | 2.7  |
| 12                                 |      | Trp <sup>2300</sup> | [2299-2308]                 | 637.8479 | 637.8477 | 2 | 0.3  |
| 13                                 |      | Trp <sup>2303</sup> | [2299-2308]                 | 637.8482 | 637.8477 | 2 | 0.8  |
| 14                                 |      | Trp <sup>2404</sup> | [2403-2407] <sup>i)</sup>   | 393.1863 | 393.1861 | 2 | 0.5  |
| 15                                 |      | Trp <sup>2429</sup> | [2426-2436]                 | 510.2263 | 510.2259 | 3 | 0.8  |
| 15                                 |      | Trp <sup>2429</sup> | [2427-2433]                 | 337.4764 | 337.4766 | 3 | -0.6 |
| 16                                 |      | Trp <sup>2839</sup> | [2835-2843]                 | 613.7801 | 613.7787 | 2 | 2.3  |
| <b>Di-hydroxylation (Tyr)</b>      |      |                     |                             |          |          |   |      |
| 1                                  | KLH1 | Tyr <sup>946</sup>  | [946-955]                   | 591.7629 | 591.7612 | 2 | 2.9  |
| 2                                  |      | Tyr <sup>2351</sup> | [2351-2357]                 | 473.2379 | 473.2372 | 2 | 1.5  |
| 1                                  | KLH2 | Tyr <sup>74</sup>   | [73-80]                     | 526.2939 | 526.2923 | 2 | 3.0  |
| 2                                  |      | Tyr <sup>2026</sup> | [2026-2033] <sup>iii)</sup> | 547.2623 | 547.2620 | 2 | 0.5  |
| 3                                  |      | Tyr <sup>2437</sup> | [2437-2444]                 | 492.2556 | 492.2555 | 2 | 0.2  |
| <b>Di-hydroxylation (Phe)</b>      |      |                     |                             |          |          |   |      |
| 1                                  | KLH1 | Phe <sup>304</sup>  | [303-308]                   | 365.6794 | 365.6795 | 2 | -0.3 |
| 2                                  |      | Phe <sup>2646</sup> | [2641-2648]                 | 512.7219 | 512.7220 | 2 | -0.2 |
| <b>Quinone</b>                     |      |                     |                             |          |          |   |      |
| 1                                  | KLH1 | Tyr <sup>74</sup>   | [73-80]                     | 525.2853 | 525.2846 | 2 | 1.3  |
| 1                                  | KLH2 | Trp <sup>1396</sup> | [1390-1399]                 | 636.2809 | 636.2811 | 2 | -0.3 |
| 2                                  |      | Trp <sup>1855</sup> | [1847-1860]                 | 384.4499 | 384.45   | 4 | -0.3 |
| <b>Trp oxidation to kynurenine</b> |      |                     |                             |          |          |   |      |
| 1                                  | KLH1 | Trp <sup>352</sup>  | [352-368]                   | 555.5302 | 555.5281 | 4 | 3.8  |
| 2                                  |      | Trp <sup>930</sup>  | [919-945]                   | 792.1234 | 792.1223 | 4 | 1.4  |
| 3                                  |      | Trp <sup>959</sup>  | [956-969]                   | 421.9475 | 421.9482 | 4 | -1.7 |
| 4                                  |      | Trp <sup>1759</sup> | [1748-1763]                 | 624.3244 | 624.3244 | 3 | 0.0  |
| 5                                  |      | Trp <sup>1955</sup> | [1943-1958]                 | 971.4746 | 971.4717 | 2 | 3.0  |
| 6                                  |      | Trp <sup>2016</sup> | [2013-2023]                 | 487.2401 | 487.2392 | 3 | 1.8  |
| 7                                  |      | Trp <sup>2195</sup> | [2190-2198]                 | 426.2041 | 426.2033 | 3 | 1.9  |
| 7                                  |      | Trp <sup>2195</sup> | [2190-2196]                 | 517.7333 | 517.7323 | 2 | 1.9  |
| 1                                  | KLH2 | Trp <sup>644</sup>  | [640-650]                   | 701.4030 | 701.4030 | 2 | 0.0  |
| 2                                  |      | Trp <sup>1759</sup> | [1749-1763]                 | 458.4977 | 458.4965 | 4 | 2.6  |
| 3                                  |      | Trp <sup>1761</sup> | [1749-1763]                 | 610.9937 | 610.9927 | 3 | 1.6  |
| 4                                  |      | Trp <sup>1855</sup> | [1847-1860]                 | 377.9547 | 377.9546 | 4 | 0.3  |
| 5                                  |      | Trp <sup>1887</sup> | [1886-1897]                 | 518.9461 | 518.9438 | 3 | 4.4  |
| 6                                  |      | Trp <sup>1890</sup> | [1886-1897]                 | 777.9177 | 777.9117 | 2 | 7.7  |
| 7                                  |      | Trp <sup>2197</sup> | [2184-2198]                 | 634.9679 | 634.9680 | 3 | -0.2 |
| 8                                  |      | Trp <sup>2300</sup> | [2299-2308]                 | 623.8522 | 623.8502 | 2 | 3.2  |
| 9                                  |      | Trp <sup>2303</sup> | [2299-2308]                 | 623.8522 | 623.8502 | 2 | 3.2  |
| <b>Trp oxidation to oxolactone</b> |      |                     |                             |          |          |   |      |
| 1                                  | KLH1 | Trp <sup>959</sup>  | [956-969]                   | 565.5909 | 565.5898 | 3 | 1.9  |

|                              |      |                     |                            |           |           |   |      |
|------------------------------|------|---------------------|----------------------------|-----------|-----------|---|------|
| 2                            |      | Trp <sup>2711</sup> | [2707-2718]                | 795.9076  | 795.9061  | 2 | 1.9  |
| 1                            | KLH2 | Trp <sup>3086</sup> | [3078-3091]                | 525.2755  | 525.2753  | 3 | 0.4  |
| <b>Formylation</b>           |      |                     |                            |           |           |   |      |
| 1                            | KLH1 | Lys <sup>232</sup>  | [230-244] <sup>i)</sup>    | 604.6194  | 604.6183  | 3 | 1.8  |
| 2                            |      | Lys <sup>372</sup>  | [369-380]                  | 469.8974  | 469.8966  | 3 | 1.7  |
| 3                            |      | Lys <sup>1132</sup> | [1132-1137]                | 365.2291  | 365.2287  | 2 | 1.1  |
| 4                            |      | Lys <sup>1198</sup> | [1193-1203]                | 468.2458  | 468.2450  | 3 | 1.7  |
| 5                            |      | Lys <sup>1333</sup> | [1322-1334]                | 758.4608  | 758.4599  | 2 | 1.2  |
| 6                            |      | Lys <sup>1609</sup> | [1605-1612]                | 465.2879  | 465.2866  | 2 | 2.8  |
| 7                            |      | Lys <sup>2032</sup> | [2024-2036]                | 820.4003  | 820.4026  | 2 | -2.8 |
| 8                            |      | Lys <sup>2198</sup> | [2197-2206]                | 601.3127  | 601.3105  | 2 | 3.7  |
| 9                            |      | Lys <sup>2341</sup> | [2341-2350]                | 591.8182  | 591.8165  | 2 | 2.9  |
| 10                           |      | Lys <sup>2350</sup> | [2342-2357]                | 650.3360  | 650.3349  | 3 | 1.7  |
| 11                           |      | Lys <sup>3173</sup> | [3170-3192]                | 722.6067  | 722.6051  | 4 | 2.2  |
| 12                           |      | Lys <sup>3275</sup> | [3270-3276]                | 327.8551  | 327.8554  | 3 | -0.9 |
| 1                            | KLH2 | Lys <sup>52</sup>   | [23-55] <sup>i)</sup>      | 933.6757  | 933.6721  | 4 | 3.9  |
| 2                            |      | Lys <sup>135</sup>  | [120-136]                  | 527.5165  | 527.5141  | 4 | 4.5  |
| 3                            |      | Lys <sup>136</sup>  | [136-148]                  | 398.9657  | 398.9651  | 4 | 1.5  |
| 4                            |      | Lys <sup>414</sup>  | [410-428]                  | 518.7919  | 518.7901  | 4 | 3.5  |
| 5                            |      | Lys <sup>1292</sup> | [1284-1296]                | 511.9292  | 511.9278  | 3 | 2.7  |
| 6                            |      | Lys <sup>1475</sup> | [1475-1489] <sup>i)</sup>  | 618.2834  | 618.2817  | 3 | 2.7  |
| 7                            |      | Lys <sup>1537</sup> | [1523-1545]                | 966.8157  | 966.8095  | 3 | 6.4  |
| 8                            |      | Lys <sup>1614</sup> | [1606-1627]                | 803.4274  | 803.4243  | 3 | 3.9  |
| 9                            |      | Lys <sup>1681</sup> | [1672-1685]                | 563.3062  | 563.3049  | 3 | 2.3  |
| 10                           |      | Lys <sup>1784</sup> | [1764-1792]                | 853.9375  | 853.9349  | 4 | 3.0  |
| 11                           |      | Lys <sup>1912</sup> | [1903-1916] <sup>i)</sup>  | 849.4074  | 849.4021  | 2 | 6.2  |
| 12                           |      | Lys <sup>2030</sup> | [2026-2033]                | 505.2821  | 505.2814  | 2 | 1.4  |
| 13                           |      | Lys <sup>2102</sup> | [2097-2106]                | 560.2957  | 560.2946  | 2 | 2.0  |
| 14                           |      | Lys <sup>2212</sup> | [2209-2220]                | 715.3517  | 715.3509  | 2 | 1.1  |
| 15                           |      | Lys <sup>2308</sup> | [2299-2309]                | 699.9006  | 699.8976  | 2 | 4.3  |
| 16                           |      | Lys <sup>2444</sup> | [2437-2463]                | 1046.5217 | 1046.5192 | 3 | 2.4  |
| 17                           |      | Lys <sup>2508</sup> | [2508-2522]                | 852.4446  | 852.4432  | 2 | 1.6  |
| 18                           |      | Lys <sup>3321</sup> | [3318-3324]                | 461.3100  | 461.3098  | 2 | 0.4  |
| <b>Phosphorylation (Thr)</b> |      |                     |                            |           |           |   |      |
| 1                            | KLH2 | Thr <sup>2031</sup> | [2026-2033]                | 531.2670  | 531.2671  | 2 | -0.2 |
| 2                            |      | Thr <sup>1588</sup> | [1584-1605]                | 866.0659  | 866.0688  | 3 | -3.3 |
| 3                            |      | Thr <sup>2031</sup> | [2026-2033] <sup>iv)</sup> | 547.2623  | 547.2620  | 2 | 0.5  |
| 3                            |      | Thr <sup>2031</sup> | [2026-2033] <sup>v)</sup>  | 539.2642  | 539.2646  | 2 | -0.7 |
| 3                            |      | Thr <sup>2031</sup> | [2026-2033] <sup>vi)</sup> | 522.2645  | 522.2628  | 2 | 3.3  |
| 3                            |      | Thr <sup>2031</sup> | [2026-2033]                | 531.2677  | 531.2671  | 2 | 1.1  |
| <b>N-glycosylation</b>       |      |                     |                            |           |           |   |      |
| 1                            | KLH1 | Asn <sup>387</sup>  | [381-407] <sup>vii)</sup>  | 733.1655  | 733.1652  | 5 | 0.4  |
| 1                            |      | Asn <sup>387</sup>  | [381-407] <sup>viii)</sup> | 952.7232  | 952.7206  | 4 | 2.7  |

|          |      |                    |                            |           |           |   |      |
|----------|------|--------------------|----------------------------|-----------|-----------|---|------|
| <b>1</b> |      | Asn <sup>387</sup> | [381-407] <sup>ix)</sup>   | 820.9286  | 820.9244  | 4 | 5.1  |
| <b>1</b> |      | Asn <sup>387</sup> | [381-407] <sup>x)</sup>    | 784.4142  | 784.4086  | 4 | 7.1  |
| <b>1</b> |      | Asn <sup>387</sup> | [383-406] <sup>viii)</sup> | 870.6787  | 870.6770  | 4 | 2.0  |
| <b>1</b> |      | Asn <sup>387</sup> | [383-406] <sup>x)</sup>    | 936.1598  | 936.1508  | 3 | 9.6  |
| <b>1</b> | KLH2 | Asn <sup>389</sup> | [383-399] <sup>vii)</sup>  | 1276.6051 | 1276.6012 | 2 | 3.1  |
| <b>1</b> |      | Asn <sup>389</sup> | [383-399] <sup>viii)</sup> | 1349.6321 | 1349.6324 | 2 | -0.2 |
| <b>1</b> |      | Asn <sup>389</sup> | [383-399] <sup>viii)</sup> | 900.0952  | 900.0909  | 3 | 4.8  |
| <b>1</b> |      | Asn <sup>389</sup> | [383-399] <sup>xi)</sup>   | 905.4226  | 905.4225  | 3 | 0.1  |
| <b>1</b> |      | Asn <sup>389</sup> | [383-409] <sup>x)</sup>    | 788.9299  | 788.9221  | 4 | 9.9  |
| <b>1</b> |      | Asn <sup>389</sup> | [385-399] <sup>viii)</sup> | 828.0652  | 828.0660  | 3 | -1.0 |

<sup>1)</sup> Numbers inside brackets correspond to the position of the proteolytic peptide of the sequence of KLH1.

- <sup>i)</sup> Carbamidomethylation of Cys
- <sup>ii)</sup> Methionine sulfoxide
- <sup>iii)</sup> Phosphorylation of Thr
- <sup>iv)</sup> Dihydroxylation of Tyr
- <sup>v)</sup> Hydroxylation of Tyr
- <sup>vi)</sup> Dehydration of Asp
- <sup>vii)</sup> N-glycosylation (Hex<sub>2</sub>HexNAc<sub>2</sub>)
- <sup>viii)</sup> N-glycosylation (Hex<sub>2</sub>HexNAc<sub>2</sub>dHex<sub>1</sub>)
- <sup>ix)</sup> N-glycosylation (HexNAc<sub>1</sub>dHex<sub>1</sub>)
- <sup>x)</sup> N-glycosylation (HexNAcylation)
- <sup>xi)</sup> N-glycosylation (Hex<sub>3</sub>HexNAc<sub>2</sub>)

**Table S13.** Summary of diagnostic ions corresponding to PTMs found in KLH proteins using the Peaks software [5].

| PTM                  | $\Delta m$                                                              | Immonium ions or other diagnostic ions (Th)                                                                                                                                                                                                                                                                                                                | Reference |
|----------------------|-------------------------------------------------------------------------|------------------------------------------------------------------------------------------------------------------------------------------------------------------------------------------------------------------------------------------------------------------------------------------------------------------------------------------------------------|-----------|
| Tyr nitration        | (+44.99)Da                                                              | 181.06                                                                                                                                                                                                                                                                                                                                                     | [6]       |
| Tyr hydroxylation    | (+15.99)Da                                                              | 152.07                                                                                                                                                                                                                                                                                                                                                     | [7]       |
| Tyr di-hydroxylation | (+31.99)Da                                                              | 168.07                                                                                                                                                                                                                                                                                                                                                     |           |
| Trp hydroxylation    | (+15.99)Da                                                              | 175.09, 146.09                                                                                                                                                                                                                                                                                                                                             | [7]       |
| Trp di-hydroxylation | (+31.99)Da                                                              | 191.08                                                                                                                                                                                                                                                                                                                                                     |           |
| Kynurenine           | (+3.99)Da                                                               | 163.09                                                                                                                                                                                                                                                                                                                                                     | [8]       |
| Lys formylation      | (+27.99)Da                                                              | 112.08                                                                                                                                                                                                                                                                                                                                                     | [9]       |
| Phosphorylation      | (+79.97)Da                                                              | Neutral loss -97.98 Da                                                                                                                                                                                                                                                                                                                                     | [10]      |
| N-glycosylation      | (+203.08)Da<br>(+349.14)Da<br>(+730.26)Da<br>(+876.32)Da<br>(+892.32)Da | N-acetylhexosamines (HexNAc, 204.08)<br>HexNAc – H <sub>2</sub> O (186.08)<br>HexNAc – 2H <sub>2</sub> O (168.07)<br>HexNAc – C <sub>2</sub> H <sub>4</sub> O <sub>2</sub> (144.07)<br>HexNAc – CH <sub>6</sub> O <sub>3</sub> (138.06)<br>HexNAc – C <sub>2</sub> H <sub>6</sub> O <sub>3</sub> (126.06)<br>Hexosa (Hex. 163.06)<br>HexNAc + Hex (366.14) | [11-13]   |

**Table S14.** Identification of the thioether bond in KLH1 and KLH2 using Kojak [2].

|   | Protein     | Assignment <sup>1)</sup>             | Thioether bond <sup>2)</sup>         | m/z exp. | m/z theor. | z     | Error (ppm) |
|---|-------------|--------------------------------------|--------------------------------------|----------|------------|-------|-------------|
| 1 | KLH1        | [477-492]                            | C <sup>480</sup> -H <sup>482</sup>   | 502.9702 | 502.9780   | 4     | -15.5       |
| 2 |             | [891-906] <sup>i)</sup>              | C <sup>894</sup> -H <sup>896</sup>   | 496.9611 | 496.9689   | 4     | -15.7       |
| 3 |             | [1292-1321] <sup>ii)</sup>           | C <sup>1309</sup> -H <sup>1311</sup> | 574.5854 | 574.5939   | 6     | -14.8       |
| 4 |             | [1720-1735] <sup>i)</sup>            | C <sup>1723</sup> -H <sup>1725</sup> | 491.2071 | 491.2149   | 4     | -15.9       |
| 1 | KLH2        | [56-72]                              | C <sup>60</sup> -H <sup>62</sup>     | 674.9725 | 674.9803   | 3     | -11.6       |
|   |             | [56-72] <sup>i)</sup>                |                                      | 510.4781 | 510.4859   | 4     | -15.3       |
| 2 |             | [477-494]                            | C <sup>482</sup> -H <sup>484</sup>   | 742.6539 | 742.6617   | 3     | -10.5       |
|   |             |                                      |                                      | 445.9923 | 446.0002   | 5     | -17.7       |
| 3 |             | [890-905] <sup>i)</sup>              | C <sup>893</sup> -H <sup>895</sup>   | 492.9623 | 492.9702   | 4     | -16.0       |
| 4 |             | [1297-1322]                          | C <sup>1310</sup> -H <sup>1312</sup> | 758.8250 | 758.8328   | 4     | -10.3       |
| 5 |             | [1722-1737] <sup>i)</sup>            | C <sup>1725</sup> -H <sup>1727</sup> | 492.2086 | 492.2165   | 4     | -16.0       |
| 6 | [2107-2153] | C <sup>2141</sup> -H <sup>2143</sup> | 749.0424                             | 749.0503 | 7          | -10.5 |             |
| 7 | [2557-2573] | C <sup>2561</sup> -H <sup>2563</sup> | 503.2061                             | 503.2139 | 4          | -15.5 |             |

<sup>1)</sup> Numbers inside brackets correspond to the position of the proteolytic peptide of the sequence of KLH1 or KLH2.

<sup>2)</sup> Residue in the sequence of KLH1 or KLH2 that is forming the thioether bond (Cys-His)

i) Methionine sulfoxide

ii) Deamidation of Asn



## References

1. Hunt, D.F., et al., *Protein sequencing by tandem mass spectrometry*. Proceedings of the National Academy of Sciences, 1986. **83**(17): p. 6233-6237, <https://doi.org/10.1073/pnas.83.17.6233>
2. Hoopmann, M.R., et al., *Kojak: efficient analysis of chemically cross-linked protein complexes*. Journal of proteome research, 2015. **14**(5): p. 2190-2198, <https://doi.org/10.1021/pr501321h>
3. Chen, Z.-L., et al., *A high-speed search engine pLink 2 with systematic evaluation for proteome-scale identification of cross-linked peptides*. Nature communications, 2019. **10**(1): p. 1-12, <https://doi.org/10.1038/s41467-019-11337-z>
4. Wisniewski, J.R. and M. Mann, *Consecutive proteolytic digestion in an enzyme reactor increases depth of proteomic and phosphoproteomic analysis*. Analytical chemistry, 2012. **84**(6): p. 2631-2637, <https://doi.org/10.1021/ac300006b>
5. Ma, B., et al., *PEAKS: powerful software for peptide de novo sequencing by tandem mass spectrometry*. Rapid communications in mass spectrometry, 2003. **17**(20): p. 2337-2342, <https://doi.org/10.1002/rcm.1196>
6. Petersson, A.S., et al., *Investigation of tyrosine nitration in proteins by mass spectrometry*. Journal of mass spectrometry, 2001. **36**(6): p. 616-625, <https://doi.org/10.1002/jms.161>
7. Mous, L., et al., *Development of novel mass spectrometric methods for identifying HOCl-induced modifications to proteins*. PROTEOMICS, 2009. **9**(6): p. 1617-1631, <https://doi.org/10.1002/pmic.200800391>.
8. Vazquez, S., et al., *A study of kynurenine fragmentation using electrospray tandem mass spectrometry*. Journal of the American Society for Mass Spectrometry, 2001. **12**(7): p. 786-794, [https://doi.org/10.1016/S1044-0305\(01\)00255-0](https://doi.org/10.1016/S1044-0305(01)00255-0).
9. Kelstrup, C.D., et al., *Analytical utility of mass spectral binning in proteomic experiments by SPectral Immonium Ion Detection (SPIID)*. Molecular & Cellular Proteomics, 2014. **13**(8): p. 1914-1924, <https://doi.org/10.1074/mcp.o113.035915>
10. Tholey, A., J. Reed, and W.D. Lehmann, *Electrospray tandem mass spectrometric studies of phosphopeptides and phosphopeptide analogues*. J Mass Spectrom, 1999. **34**(2): p. 117-23, [https://doi.org/10.1002/\(sici\)1096-9888\(199902\)34:2<117::aid-jms769>3.0.co;2-v](https://doi.org/10.1002/(sici)1096-9888(199902)34:2<117::aid-jms769>3.0.co;2-v)
11. Zhao, P., et al., *Combining high-energy C-trap dissociation and electron transfer dissociation for protein O-GlcNAc modification site assignment*. Journal of proteome research, 2011. **10**(9): p. 4088-4104, <https://doi.org/10.1021/pr2002726>
12. Toghi Eshghi, S., et al., *GPQuest: a spectral library matching algorithm for site-specific assignment of tandem mass spectra to intact N-glycopeptides*. Analytical chemistry, 2015. **87**(10): p. 5181-5188, <https://doi.org/10.1021/acs.analchem.5b00024>
13. Pioch, M., et al., *GlyXtoolMS: an open-source pipeline for semiautomated analysis of glycopeptide mass spectrometry data*. Analytical chemistry, 2018. **90**(20): p. 11908-11916, <https://doi.org/10.1021/acs.analchem.8b02087>
